# Supplementary material for: Impact of Protein Stability, Cellular Localization, and Abundance on Proteomic Detection of Tumor-Derived Proteins in Plasma
Source: PLoS One. 2011 Jul 29;6(7):e23090. doi: 10.1371/journal.pone.0023090 (PMC3146523; doi:10.1371/journal.pone.0023090)
Supplement: Table S1 — Proteins identified in the tumor and plasma of the A431 human cell lines xenografted mouse model. (XLS) [file pone.0023090.s002.xls]

## Sheet: A431_tumor_plasma_submit
Supplementary Table I: Proteins identified in the tumor and plasma of the A431 human cell lines xenografted mouse model.
	Note:
	column C: whether a protein group is human specific or mouse specific or shared between two species
	column D: wehter a protein group is identified in plasma sample or tumor sample or both
	column E: whether a human protein has mouse homologue
	column F to U: total peptides, unique peptides, treated/untreated ratios and standard deviation of the ratios for proteins identified in A431s plasma, A431gr plasma, A431s tumor and A431gr tumor sample
	column V: whether a protein is in extracellular group
	column W: number of tryptic peptides for the protein group. For multiple sequence, using the one with the most number of tryptic peptides
	column X: instability score (Guruprasad, K., Protein Eng, 1990. 4(2): p. 155-61.). For multiple sequence, uses averaged score
	column Y: wheter a protein is stable or not (stable: instability score <40; unstable: instability score >=40)
Gene_symbol	Indistinguishable_Proteins	human_or_mouse	source	mouse_homologues	total.plasma.A431s	unique.plasma.A431s	treated/untreated ratio (plasma.A431s)	stdev.plasma.A431s	total.plasma.A43gr	unique.plasma.A43gr	treated/untreated ratio (plasma.A43gr)	stdev.plasma.A43gr	total.tumor.A431s	unique.tumor.A431s	treated/untreated ratio (tumor.A431s)	stdev.tumor.A431s	total.tumor.A43gr	unique.tumor.A43gr	treated/untreated ratio (tumor.A43gr)	stdev.tumor.A43gr	is_extracellular	number_tryptic_peptides	instablity_score	is_stable	Gene Ontology Cellular Location	Description
AZGP1	IPI00166729 ; IPI00816309 ; IPI00871596	human	plasma and tumor	Yes	5	2							4	4			2	1			Yes	16	44.1976	No	plasmamembrane;cell;proteincomplex;extracellularregion; /// plasmamembrane;cell;proteincomplex;	ALPHA-2-GLYCOPROTEIN 1, ZINC.
ITIH3	IPI00028413 ; IPI00873416 ; IPI00876950	human	plasma and tumor	Yes					2	1	-0.807355	0.07	27	4			21	3			Yes	45.5	32.6293	Yes	extracellularregion;	ISOFORM 1 OF INTER-ALPHA-TRYPSIN INHIBITOR HEAVY CHAIN H3 PRECURSOR.
PKP1	IPI00071509 ; IPI00218528 ; IPI00888683	human	plasma and tumor	Yes	2	1							233	30	1.18442	0.1	212	23	1	0.06	No	58.3333	51.4403	No	plasmamembrane;nucleus;cytoskeleton;	ISOFORM 2 OF PLAKOPHILIN-1.
PRDX1	IPI00000874 ; IPI00640741 ; IPI00641244	human	plasma and tumor	Yes	2	2	-2.58015	0	28	3	-0.536053	0.07	95	9	-0.0426443	0.07	132	10	0.104697	0.08	No	13	23.433	Yes	cytoplasm;nucleus;cytoplasmicmembrane-boundedvesicle;"GO:0005634,IDA;GO:0005737,IDA"	PEROXIREDOXIN-1.
MDH2	IPI00291006	human	plasma and tumor	Yes					10	3	-0.918386	0.03	55	12	0.0291463	0.06	87	10	0	0.15	No	24	31.9234	Yes	mitochondrion;"GO:0005739,IDA;GO:0005739,EXP"	MALATE DEHYDROGENASE, MITOCHONDRIAL PRECURSOR.
HSPG2	IPI00024284	human	plasma and tumor	Yes					1	1			33	10	0.304006	0.03	50	22	0.599462	0.09	Yes	188	46.1301	No	extracellularregion;proteinaceousextracellularmatrix;	BASEMENT MEMBRANE-SPECIFIC HEPARAN SULFATE PROTEOGLYCAN CORE PROTEIN PRECURSOR.
DSC1	IPI00007425 ; IPI00216099 ; IPI00386975	human	plasma and tumor	Yes	18	5							117	16	1.59946	0.12	31	10	0.556393	0.05	No	48	43.2046	No	cell; /// plasmamembrane;cell;	DESMOCOLLIN 1 ISOFORM DSC1B PREPROPROTEIN.
S100A9	IPI00027462	human	plasma and tumor	Yes	25	5			25	5			390	4			401	5			No	8	38.6754	Yes	nucleus;cytoplasm;"GO:0005634,IDA;GO:0005737,IDA"	PROTEIN S100-A9.
PRDX5	IPI00024915 ; IPI00375306 ; IPI00375307 ; IPI00759663 ; IPI00876999	human	plasma and tumor	Yes					1	1			44	7	0.358454	0.13	55	6	0.434403	0.03	No	10.2	18.6267	Yes	cytoplasm;mitochondrion;peroxisome;"GO:0005739,IDA;GO:0005777,IDA" /// mitochondrion;cytoplasm;peroxisome;"GO:0005739,IDA;GO:0005777,IDA" /// mitochondrion;	ISOFORM MITOCHONDRIAL OF PEROXIREDOXIN-5, MITOCHONDRIAL PRECURSOR.
FGB	IPI00298497	human	plasma and tumor	Yes	185	12	-4.31034	8.65	108	11	-0.0703893	0.3	45	5	0.599462	0.13	77	6	0.152003	0.27	Yes	34	42.4656	No	extracellularspace;plasmamembrane;cell;nucleus;proteincomplex;extracellularregion;cytoplasm;cytoplasmicmembrane-boundedvesicle;"GO:0005576,EXP;GO:0005576,EXP;GO:0005576,EXP;GO:0005576,EXP;GO:0005634,IDA;GO:0005737,IDA;GO:0005886,IDA;GO:0005886,EXP;GO:0016	FIBRINOGEN BETA CHAIN PRECURSOR.
LDHA	IPI00217966 ; IPI00607708 ; IPI00795075	human	plasma and tumor	Yes	4	1			15	6	-0.713696	0.02	220	15	-0.226509	0.1	292	16	0.136062	0.06	No	24.3333	24.7892	Yes	cytosol;cytoplasm; /// cytoplasm;	ISOFORM 1 OF L-LACTATE DEHYDROGENASE A CHAIN.
CSTB	IPI00021828	human	plasma and tumor	Yes					10	3			36	4			34	4			No	8	39.3	Yes	intracellular;cytoplasm;nucleus;	CYSTATIN-B.
IDH1	IPI00027223	human	plasma and tumor	Yes	1	1							15	9			19	7			No	34	28.1592	Yes	cytosol;cytoplasm;peroxisome;	ISOCITRATE DEHYDROGENASE [NADP] CYTOPLASMIC.
C3	IPI00783987 ; IPI00887739	human	plasma and tumor	Yes	21	4	-4.80323	7.36	28	11			26	5			32	10	-0.137504	0.01	Yes	106.5	42.4744	No	extracellularregion;"GO:0005576,EXP;GO:0005576,EXP;GO:0005576,EXP;GO:0005576,EXP;GO:0005576,EXP"	COMPLEMENT C3 PRECURSOR (FRAGMENT).
TPI1	IPI00451401 ; IPI00465028 ; IPI00796633	human	plasma and tumor	Yes	58	5	-4.2854	5.7	1	1			136	13	-0.275007	0.11	150	14	0.251539	0.04	No	16.6667	23.591	Yes	cytosol;"GO:0005829,EXP"	ISOFORM 2 OF TRIOSEPHOSPHATE ISOMERASE.
PGLYRP2	IPI00163207 ; IPI00394992	human	plasma and tumor	Yes	46	5	-5.06134	13.78	8	2	-4.2765	5.12					2	1	0.643856	0.05	Yes	29.5	45.5406	No	cell;intracellular;extracellularregion;	ISOFORM 1 OF N-ACETYLMURAMOYL-L-ALANINE AMIDASE PRECURSOR.
BLMH	IPI00219575 ; IPI00873294	human	plasma and tumor	Yes	17	2			15	1			7	2			3	1			No	35	34.5499	Yes	cell;nucleus;cytoplasm;	BLEOMYCIN HYDROLASE.
CMPK1	IPI00219953 ; IPI00514049 ; IPI00514929	human	plasma and tumor	Yes	1	1							13	5			13	5			No	14	34.7506	Yes	nucleus;cytoplasm;	CYTIDINE MONOPHOSPHATE (UMP-CMP) KINASE 1, CYTOSOLIC.
CFL1	IPI00012011	human	plasma and tumor	Yes					1	1			129	7	0.251539	0.06	195	7	0.200913	0.05	No	14	41.1578	No	intracellular;cytoplasm;nucleus;cytoskeleton;	COFILIN-1.
ORM2;ORM1	IPI00020091 ; IPI00022429 ; IPI00884926	human	plasma and tumor	Yes					2	2			2	2							Yes	14.5	36.9702	Yes	extracellularspace;extracellularregion;	ALPHA-1-ACID GLYCOPROTEIN 2 PRECURSOR.
SBSN	IPI00373937	human	plasma and tumor	Yes	6	3							90	6			35	7			Yes	14	15.5547	Yes	extracellularregion;	SUPRABASIN PRECURSOR.
PARK7	IPI00298547	human	plasma and tumor	Yes					2	1			35	5	0.0144996	0.04	66	7	0.251539	0.05	No	14	27.855	Yes	nucleus;cytoplasm;"GO:0005634,IDA;GO:0005737,IDA"	PROTEIN DJ-1.
GPI	IPI00027497 ; IPI00848316	human	plasma and tumor	Yes					4	3			101	15	-0.613532	0.04	112	16	0.0291463	0.02	Yes	38	26.7213	Yes	extracellularspace;cytoplasm;	GLUCOSE-6-PHOSPHATE ISOMERASE.
APOH	IPI00298828	human	plasma and tumor	Yes					76	4	0.184425	0.05									Yes	20	48.1	No	extracellularspace;cell;nucleus;extracellularregion;cytoplasm;"GO:0005634,IDA;GO:0005737,IDA;GO:0005623,IDA;GO:0005615,IDA;GO:0005615,IDA;GO:0005615,IDA"	BETA-2-GLYCOPROTEIN 1 PRECURSOR.
FABP5;FABP5L7;FABP5L2;FABP5	IPI00007797 ; IPI00787709 ; IPI00788781	human	plasma and tumor	Yes	26	3	-2.86196	3.37	20	3	-0.250962	0.02	605	7	0.643856	0.07	238	7	0.643856	0.06	No	10.3333	18.0426	Yes	cytoplasm;	FATTY ACID-BINDING PROTEIN, EPIDERMAL.
SOD2	IPI00022314 ; IPI00607577 ; IPI00847322	human	plasma and tumor	Yes	1	1			13	3			3	3							No	12	39.3612	Yes	mitochondrion;	SUPEROXIDE DISMUTASE [MN], MITOCHONDRIAL PRECURSOR.
TTR	IPI00022432 ; IPI00646384 ; IPI00855916	human	plasma and tumor	Yes	21	5			10	3			3	2							Yes	9.33333	29.7156	Yes	extracellularregion;	TRANSTHYRETIN PRECURSOR.
FGA	IPI00021885 ; IPI00029717 ; IPI00871469 ; IPI00893597	human	plasma and tumor	Yes	143	13	-4.26228	4.04	29	3			1	1			1	1			Yes	35.25	40.7725	No	extracellularspace;extracellularregion;plasmamembrane;proteincomplex;cytoplasmicmembrane-boundedvesicle;"GO:0005576,EXP;GO:0005576,EXP;GO:0005576,EXP;GO:0005576,EXP;GO:0005886,EXP;GO:0016023,EXP" /// extracellularspace;plasmamembrane;proteincomplex;extrac	ISOFORM 1 OF FIBRINOGEN ALPHA CHAIN PRECURSOR.
CYCS	IPI00465315 ; IPI00872914	human	plasma and tumor	Yes					4	2			31	5			15	3			No	9	11.3762	Yes	cytosol;nucleus;proteincomplex;mitochondrion;intracellular;"GO:0005634,IDA;GO:0005829,IMP;GO:0005829,EXP;GO:0005829,EXP;GO:0005829,EXP" /// mitochondrion;	CYTOCHROME C.
ECM1	IPI00003351 ; IPI00645849	human	plasma and tumor	Yes	1	1							50	11	0.0588937	0.13	36	10	0.0892673	0.27	Yes	39.5	71.963	No	extracellularregion;proteinaceousextracellularmatrix; /// extracellularregion;	EXTRACELLULAR MATRIX PROTEIN 1 PRECURSOR.
APOA2	IPI00021854	human	plasma and tumor	Yes	26	2	-0.963474	0.12	174	2	0.0740006	0.05	5	2	1	0					Yes	7	27.226	Yes	intracellular;extracellularspace;organelle;extracellularregion;"GO:0005576,EXP;GO:0005576,EXP;GO:0043226,EXP;GO:0005622,EXP;GO:0005615,IDA;GO:0005615,IDA;GO:0005615,IDA;GO:0005615,IDA;GO:0005615,IDA"	APOLIPOPROTEIN A-II PRECURSOR.
CLU	IPI00291262 ; IPI00400826 ; IPI00793848 ; IPI00795633	human	plasma and tumor	Yes					11	2							3	2			Yes	30.3333	52.7551	No	extracellularspace;extracellularregion;	CLUSTERIN PRECURSOR.
GAPDH	IPI00219018 ; IPI00795257	human	plasma and tumor	Yes	102	7	-3.69153	4.71	14	5			407	13	-0.604071	0.13	704	13	-0.15056	0.06	No	21	15.6134	Yes	cell;cytoplasm;	GLYCERALDEHYDE-3-PHOSPHATE DEHYDROGENASE.
PZP	IPI00025426 ; IPI00748437 ; IPI00884981	human	plasma and tumor	Yes					2	2			2	1							Yes	65.5	36.7702	Yes	extracellularregion;	ISOFORM 1 OF PREGNANCY ZONE PROTEIN PRECURSOR.
ACAT2	IPI00291419	human	plasma and tumor	Yes					1	1	-1.39506	0	33	9	-0.454176	0.15	27	7	0.321928	0.17	No	24	34.9615	Yes	cytoplasm;	ACETYL-COA ACETYLTRANSFERASE, CYTOSOLIC.
DSC3	IPI00031549 ; IPI00218928	human	plasma and tumor	Yes	4	4							149	19	1.152	0.08	103	15	1.05889	0.04	No	58	39.6416	No	plasmamembrane;cell;	ISOFORM 3A OF DESMOCOLLIN-3 PRECURSOR.
GSN	IPI00026314 ; IPI00641047 ; IPI00646773 ; IPI00647556	human	plasma and tumor	Yes	1	1							67	16	-0.0840643	0	104	15			Yes	27	33.161	Yes	extracellularregion;cell;cytoplasm;cytosol;cytoskeleton;"GO:0005576,IDA;GO:0005829,IDA" /// cell; /// cell;cytosol;cytoskeleton;extracellularregion;cytoplasm;"GO:0005576,IDA;GO:0005829,IDA"	ISOFORM 1 OF GELSOLIN PRECURSOR.
TLN1	IPI00298994	human	plasma and tumor	Yes	1	1			4	2			153	38	0.120294	0.19	195	52	0.184425	0.14	No	161	37.1494	Yes	plasmamembrane;cell;cytoskeleton;intracellular;organelle;cytoplasm;"GO:0043226,IDA;GO:0005622,IDA"	TALIN-1.
;ANXA2	IPI00334627 ; IPI00418169 ; IPI00455315	human	plasma and tumor	Yes	1	1							276	15	-0.137504	0.15	383	15	-0.0426443	0.06	Yes	28	36.9752	Yes	proteinaceousextracellularmatrix;extracellularregion;cytoplasmicmembrane-boundedvesicle; /// proteinaceousextracellularmatrix;plasmamembrane;cell;extracellularregion;cytoplasmicmembrane-boundedvesicle;	UNCHARACTERIZED PROTEIN ENSP00000329640.
SFN	IPI00013890 ; IPI00411765	human	plasma and tumor	Yes	1	1	-2.75275	0	9	1	-0.757023	0.04	556	13	0.168123	0.09	877	12	0.251539	0.06	Yes	21	48.5928	No	extracellularspace;extracellularregion;cytoplasm;nucleus; /// extracellularspace;nucleus;extracellularregion;cytoplasm;	ISOFORM 1 OF 14-3-3 PROTEIN SIGMA.
A1BG	IPI00022895 ; IPI00644018 ; IPI00646799 ; IPI00745089	human	plasma and tumor	Yes	43	7			8	1			2	1							Yes	18	46.998	No	extracellularregion;"GO:0005576,IDA"	ALPHA-1B-GLYCOPROTEIN PRECURSOR.
CAT	IPI00465436	human	plasma and tumor	Yes	1	1							26	13			17	7			No	38	30.1529	Yes	mitochondrion;peroxisome;"GO:0005777,IDA"	CATALASE.
MIF	IPI00293276	human	plasma and tumor	Yes					6	2	0.268817	0.04	28	3	0.0740006	0.18	21	3	0.599462	0.06	Yes	5	34.2052	Yes	extracellularspace;extracellularregion;"GO:0005576,IDA"	MACROPHAGE MIGRATION INHIBITORY FACTOR.
B2M	IPI00004656 ; IPI00796379 ; IPI00868938	human	plasma and tumor	Yes	29	4	-2.26903	1.45	29	4	0.736966	0.02	25	4	0.415037	0.02	10	2	0.473931	0.01	Yes	7.5	32.3274	Yes	extracellularregion;endosome;plasmamembrane;proteincomplex;Golgiapparatus;"GO:0005794,EXP;GO:0005794,IDA;GO:0005886,IDA;GO:0005886,EXP;GO:0005886,EXP;GO:0005768,EXP" /// plasmamembrane;proteincomplex;extracellularregion;	BETA-2-MICROGLOBULIN.
PFN1	IPI00216691	human	plasma and tumor	Yes	1	1			19	3			72	7	0.168123	0.12	79	6	-0.0426443	0.05	No	10	43.5686	No	cytoskeleton;cytoplasm;	PROFILIN-1.
ENO1	IPI00465248	human	plasma and tumor	Yes	91	7			124	8			560	19	-0.111031	0.08	811	18	0.168123	0.06	No	32	36.527	Yes	plasmamembrane;nucleus;proteincomplex;cytosol;cytoplasm;	ISOFORM ALPHA-ENOLASE OF ALPHA-ENOLASE.
PRDX2	IPI00027350 ; IPI00794777	human	plasma and tumor	Yes	1	1							15	3	-0.505891	0.25	13	2			No	12.5	21.0495	Yes	cytoplasm;	PEROXIREDOXIN-2.
S100A8	IPI00007047	human	plasma and tumor	Yes	9	2			1	1			439	7	-0.0285692	0.74	292	8	2.05889	0.02	not annotated	9	25.0366	Yes		PROTEIN S100-A8.
CTSD	IPI00011229 ; IPI00658053 ; IPI00852597 ; IPI00853455 ; IPI00879328	human	plasma and tumor	Yes	4	2			1	1			58	9	0.971431	0.07	34	6	0.286304	0.05	Yes	17.75	37.9444	No	extracellularregion;lysosome;cytoplasmicmembrane-boundedvesicle;mitochondrion;	CATHEPSIN D PRECURSOR.
ALDOA	IPI00465439 ; IPI00796333	human	plasma and tumor	Yes					38	4	-1.33914	0.13	210	15	-0.201634	0.16	287	16	0.234465	0.11	No	25	35.9637	Yes	nucleus;cytoplasm;"GO:0005634,IDA;GO:0005737,IDA"	FRUCTOSE-BISPHOSPHATE ALDOLASE A.
ACTBL2	IPI00003269	human	plasma and tumor	Yes	1	1							162	6	0.136062	0	181	7	0.0439433	0.03	No	25	36.3516	Yes	cytoplasm;cytoskeleton;	PROTEIN BETA-ACTIN-LIKE.
F7	IPI00382606	human	plasma and tumor	Yes					9	2			1	1			10	3			Yes	41	48.4683	No	extracellularregion;	FACTOR VII ACTIVE SITE MUTANT IMMUNOCONJUGATE.
ALDOC	IPI00418262 ; IPI00789171 ; IPI00792375	human	plasma and tumor	Yes	83	1			38	1			41	9	-0.0703893	0.16	80	11	0.454032	0.05	No	20.3333	23.3356	Yes	mitochondrion;	FRUCTOSE-BISPHOSPHATE ALDOLASE C.
ARG1	IPI00038356 ; IPI00291560 ; IPI00398768	human	plasma and tumor	Yes	6	3							8	5							No	17.5	23.9021	Yes	cytoplasm;	ISOFORM 3 OF ARGINASE-1.
TKT	IPI00643920 ; IPI00788802 ; IPI00789310 ; IPI00792641 ; IPI00793119	human	plasma and tumor	Yes	2	2			3	2			108	13	-0.298658	0.09	118	15	0.0588937	0.01	No	33.5	35.292	Yes	cytosol;"GO:0005829,EXP"	TRANSKETOLASE.
CD44	IPI00297160 ; IPI00305064 ; IPI00418465 ; IPI00419219 ; IPI00798069 ; IPI00827555 ; IPI00827650 ; IPI00827658 ; IPI00827795 ; IPI00827893 ; IPI00827937 ; IPI00827982 ; IPI00828056 ; IPI00828064 ; IPI00828108 ; IPI00828117 ; IPI00828192	human	plasma and tumor	Yes					4	1			59	6	-0.0426443	0.12	24	3			Yes	23.6923	36.4662	Yes	cell;plasmamembrane;extracellularregion;cytoplasm;Golgiapparatus;"GO:0005737,IDA;GO:0005794,IDA;GO:0005886,IDA;GO:0005886,IDA;GO:0005623,IDA;GO:0005576,IDA" /// cell;	ISOFORM 12 OF CD44 ANTIGEN PRECURSOR.
IGHA1;IGHA2;IGH@	IPI00061977 ; IPI00166866 ; IPI00383164 ; IPI00384952 ; IPI00386524 ; IPI00386879 ; IPI00423460 ; IPI00423462 ; IPI00426060 ; IPI00430842 ; IPI00449920 ; IPI00641229 ; IPI00642017 ; IPI00647704 ; IPI00719233 ; IPI00744561 ; IPI00783993 ; IPI00784758 ; IPI	human	plasma and tumor		3	2			1	1			1	1			8	3			No	23.4444	45.0171	No	cell;	IGHA1 PROTEIN.
PDCD4	IPI00240675 ; IPI00290110	human	plasma and tumor		1	1							8	6	1.18442	0.02	7	5	1.88897	0.05	No	28.5	36.0768	Yes	cytosol;nucleus;cytoplasm;"GO:0005634,IMP;GO:0005737,IMP;GO:0005829,IDA"	PROGRAMMED CELL DEATH 4 ISOFORM 2.
MTAP	IPI00011876 ; IPI00382958	human	plasma and tumor		12	3	-3.83794	2.88					11	5	-0.0285692	0.1	18	5	-0.163499	0	No	14.5	41.2982	No	cytoplasm;	S-METHYL-5'-THIOADENOSINE PHOSPHORYLASE.
HSPE1	IPI00220362	human	plasma and tumor						1	1			22	5			9	3			No	11	23.7519	Yes	mitochondrion;"GO:0005739,IDA"	10 KDA HEAT SHOCK PROTEIN, MITOCHONDRIAL.
DSP	IPI00013933 ; IPI00217182	human	plasma and tumor		37	16			10	6			721	84	1.32193	0.05	849	92	1	0.08	No	218.5	49.0035	No	plasmamembrane;cytoplasm;cytoskeleton;"GO:0005856,IDA" /// plasmamembrane;cytoskeleton;cytoplasm;"GO:0005856,IDA"	ISOFORM DPI OF DESMOPLAKIN.
NUBP2	IPI00644674 ; IPI00872338	human	plasma and tumor						2	1			3	2			6	2			No	15	42.9565	No	nucleus;	NUCLEOTIDE-BINDING PROTEIN 2.
ATP6V1C1	IPI00007814 ; IPI00789054 ; IPI00873237	human	plasma and tumor		1	1							3	2	0.0144996	0	2	2	0.184425	0	No	27.3333	30.6284	Yes	cell;proteincomplex;	VACUOLAR PROTON PUMP SUBUNIT C 1.
CDSN	IPI00386809 ; IPI00646774 ; IPI00889561 ; IPI00892693 ; IPI00894350	human	plasma and tumor		20	2							20	4			6	3			Yes	13	56.8896	No	plasmamembrane;cytoskeleton;extracellularregion;"GO:0005856,IDA"	CORNEODESMOSIN PRECURSOR.
PTPRF	IPI00107831 ; IPI00465186 ; IPI00480183 ; IPI00641061 ; IPI00642154 ; IPI00655814 ; IPI00853169 ; IPI00853550 ; IPI00871665	human	plasma and tumor		1	1							1	1	1.94342	0	4	2			No	74.2857	42.5125	No	cell;plasmamembrane;	RECEPTOR-TYPE TYROSINE-PROTEIN PHOSPHATASE F PRECURSOR.
U2AF1	IPI00005613 ; IPI00457142 ; IPI00619914 ; IPI00619942	human	plasma and tumor						1	1			10	4	0.415037	0.08	8	3	0.168123	0.01	No	12.6667	67.5502	No	nucleoplasm;nucleus;"GO:0005634,IDA" /// nucleus;	SPLICING FACTOR U2AF 35 KDA SUBUNIT.
MTHFD1	IPI00218342 ; IPI00794900	human	plasma and tumor		7	1							14	7	1.94342	0.17	16	11			No	64	31.8151	Yes	mitochondrion;cytoplasm;	C-1-TETRAHYDROFOLATE SYNTHASE, CYTOPLASMIC.
PI3	IPI00021434	human	plasma and tumor		8	1	-1.03562	0.07					47	4	0.810966	0.03	23	5	0.0740006	0.05	Yes	9	35.5513	Yes	extracellularregion;proteinaceousextracellularmatrix;	ELAFIN PRECURSOR.
POF1B	IPI00103242 ; IPI00646687 ; IPI00794787 ; IPI00871285	human	plasma and tumor		2	2															No	24.5	57.4466	No	nucleus;cytoplasm;Golgiapparatus;"GO:0005634,IDA;GO:0005737,IDA;GO:0005794,IDA"	ISOFORM 1 OF PROTEIN POF1B.
S100A7	IPI00219806	human	plasma and tumor		2	1			10	3			239	7	0.713119	0.06	124	4	0.395929	0.01	Yes	7	41.301	No	plasmamembrane;cytosol;nucleus;extracellularregion;cytoplasm;endoplasmicreticulum;"GO:0005576,IDA;GO:0005576,IDA;GO:0005634,IDA;GO:0005737,IDA;GO:0005783,IDA;GO:0005829,IDA"	PROTEIN S100-A7.
HSD17B4	IPI00019912 ; IPI00847995	human	plasma and tumor		2	1							17	7			3	2			No	35.5	29.804	Yes	mitochondrion;peroxisome;"GO:0005777,EXP" /// mitochondrion;peroxisome;	PEROXISOMAL MULTIFUNCTIONAL ENZYME TYPE 2.
CA2	IPI00218414 ; IPI00790885	human	plasma and tumor		5	1							35	8			16	4			No	12	21.6846	Yes	nucleus;cytoplasm;"GO:0005634,IDA;GO:0005737,IDA"	CARBONIC ANHYDRASE 2.
HPX	IPI00022488	human	plasma and tumor		5	1			15	2			16	2			11	2			Yes	29	33.8816	Yes	extracellularspace;extracellularregion;	HEMOPEXIN PRECURSOR.
DSG1	IPI00025753	human	plasma and tumor		74	11			31	5			189	20	1.94342	0.02	184	19	0.836501	0.07	No	43	40.2042	No	cell;plasmamembrane;cytosol;"GO:0005829,EXP;GO:0005886,EXP"	DESMOGLEIN-1 PRECURSOR.
	IPI00328587	human	plasma and tumor		7	1							21	3			47	3			No	30	34.774	Yes	proteincomplex;cytosol;	ENOLASE.
TMEM205	IPI00063130	human	plasma and tumor						2	1			2	1			3	2			No	9	39.1958	Yes	cell;cytoplasmicmembrane-boundedvesicle;	TRANSMEMBRANE PROTEIN 205.
PRSS3	IPI00015614 ; IPI00220839 ; IPI00385250 ; IPI00843764	human	plasma and tumor		28	2			12	1							2	1			Yes	15	24.0173	Yes	extracellularspace;extracellularregion;"GO:0005615,IDA"	ISOFORM A OF TRYPSIN-3 PRECURSOR.
TGM3	IPI00300376	human	plasma and tumor		6	4			2	1											No	47	33.128	Yes	plasmamembrane;nucleus;intracellular;cytoplasm;Golgiapparatus;"GO:0005634,IDA;GO:0005737,IDA;GO:0005794,IDA;GO:0005622,IDA;GO:0005886,IDA"	PROTEIN-GLUTAMINE GAMMA-GLUTAMYLTRANSFERASE E PRECURSOR.
MACROD1	IPI00155601	human	plasma and tumor						1	1			2	2	-0.189034	0	1	1			No	27	40.5551	No	mitochondrion;	MACRO DOMAIN-CONTAINING PROTEIN 1.
NDUFA4	IPI00011770	human	plasma and tumor						1	1			9	2			2	1			No	6	22.5346	Yes	cell;proteincomplex;mitochondrion;"GO:0005739,IDA"	NADH DEHYDROGENASE [UBIQUINONE] 1 ALPHA SUBCOMPLEX SUBUNIT 4.
DCD	IPI00027547 ; IPI00847793	human	plasma and tumor		20	1			7	1			2	2			8	3			Yes	8	24.4073	Yes	extracellularregion;"GO:0005576,IDA"	DERMCIDIN PRECURSOR.
ACAT1	IPI00030363 ; IPI00062003 ; IPI00440499	human	plasma and tumor		5	1							2	2			9	7	1.73697	0	No	23.6667	37.618	No	mitochondrion;"GO:0005739,EXP;GO:0005739,EXP" /// mitochondrion;"GO:0005739,IDA"	ACETYL-COA ACETYLTRANSFERASE, MITOCHONDRIAL PRECURSOR.
RALY	IPI00011268 ; IPI00216044 ; IPI00641351 ; IPI00642213 ; IPI00847752	human	plasma and tumor		2	1							9	5			10	3			No	19.6667	35.6906	No	nucleus;	RNA BINDING PROTEIN (FRAGMENT).
	IPI00247167	human	plasma and tumor		2	1							11	3			7	2			not annotated	16	79.9	No		PUTATIVE UNCHARACTERIZED PROTEIN LOC342897.
GOT2	IPI00018206	human	plasma and tumor						5	2			7	4			11	6	0.943416	0	No	33	25.5351	Yes	plasmamembrane;mitochondrion;"GO:0005739,IDA;GO:0005739,EXP;GO:0005886,IDA"	ASPARTATE AMINOTRANSFERASE, MITOCHONDRIAL PRECURSOR.
PMPCA	IPI00166749 ; IPI00642047	human	plasma and tumor		1	1	-5.02989	0					1	1	-0.163499	0	3	2			No	20.5	36.2747	Yes	mitochondrion;	MITOCHONDRIAL-PROCESSING PEPTIDASE SUBUNIT ALPHA, MITOCHONDRIAL PRECURSOR.
IGL@;IGLV4-3;IGLV3-25;IGL@;IGLC1;IGLC2;IGLC3;IGLV3-21;IGLV2-14;IGLC1;IGLC2;IGLC3	IPI00154742 ; IPI00382938 ; IPI00450309 ; IPI00550162 ; IPI00555945 ; IPI00642632 ; IPI00658130 ; IPI00718819 ; IPI00719373 ; IPI00719452 ; IPI00744476 ; IPI00745660 ; IPI00784519 ; IPI00784589 ; IPI00784627 ; IPI00784711 ; IPI00784713 ; IPI00784935 ; IPI	human	plasma and tumor		4	2			1	1			1	1			6	1			Yes	12.2	44.8232	No	extracellularregion;"GO:0005576,EXP;GO:0005576,EXP;GO:0005576,EXP"	IGL@ PROTEIN.
LGALS7	IPI00219221	human	plasma and tumor		6	3			6	2			385	7	0.184425	0.1	429	5	0.0144996	0.08	Yes	11	37.5338	Yes	extracellularspace;nucleus;extracellularregion;cytoplasm;	GALECTIN-7.
HSPB1	IPI00025512 ; IPI00888192	human	plasma and tumor		3	3			1	1			205	11			241	11			No	9	50.5187	No	cell;cytoplasm;nucleus;cytoskeleton;"GO:0005623,IDA"	HEAT SHOCK PROTEIN BETA-1.
;IGKV1-5;IGKC	IPI00384397 ; IPI00387107 ; IPI00387111 ; IPI00419424 ; IPI00430808 ; IPI00550731 ; IPI00736885 ; IPI00743194 ; IPI00743389 ; IPI00827773 ; IPI00827829 ; IPI00829600 ; IPI00829663 ; IPI00829947 ; IPI00854709 ; IPI00893819	human	plasma and tumor		2	2			2	1							8	2			Yes	6.44444	40.3821	No	extracellularregion; /// extracellularregion;"GO:0005576,EXP;GO:0005576,EXP;GO:0005576,EXP"	MYOSIN-REACTIVE IMMUNOGLOBULIN LIGHT CHAIN VARIABLE REGION (FRAGMENT).
HRNR	IPI00398625 ; IPI00787362	human	plasma and tumor		531	24			106	12			14	5			18	9			not annotated	93.5	69.7214	No		HORNERIN.
CSTA	IPI00032325 ; IPI00794081	human	plasma and tumor		23	3			8	3			25	4			18	4			No	7	13.8508	Yes	nucleus;cytoskeleton;intracellular;cytoplasm;"GO:0005856,IDA;GO:0005634,IDA"	CYSTATIN-A.
	IPI00470657	human	plasma and tumor		48	2			10	1							15	4	0.0740006	0.05	not annotated	25	39.0769	Yes		ANTI-COLORECTAL CARCINOMA HEAVY CHAIN.
TXN	IPI00216298 ; IPI00552768	human	plasma and tumor		1	1			1	1			103	5	0.168123	0.05	28	3	0.268817	0.02	No	7.5	26.8771	Yes	cytosol;mitochondrion;cytoplasm;"GO:0005829,EXP;GO:0005829,EXP"	THIOREDOXIN.
MARCKS	IPI00219301	human	plasma and tumor						2	1			21	6			49	6			No	11	60.2606	No	cell;nucleus;cytoskeleton;microtubuleorganizingcenter;cytoplasm;	MYRISTOYLATED ALANINE-RICH C-KINASE SUBSTRATE.
PPIA	IPI00419585 ; IPI00877002 ; IPI00887678	human	plasma and tumor		19	1			31	2	-0.124328	0.03	81	7	0.915936	0.14	93	7	0.666576	0.08	Yes	17.5	10.6521	Yes	cytosol;nucleus;extracellularregion;cytoplasm;"GO:0005576,EXP;GO:0005634,IDA;GO:0005737,IDA;GO:0005829,EXP;GO:0005829,EXP"	PEPTIDYL-PROLYL CIS-TRANS ISOMERASE A.
FLG	IPI00026256 ; IPI00654788 ; IPI00746718	human	plasma and tumor		13	5			5	4			1298	84	1.21759	0.02	511	58	0.713119	0.02	No	160.333	73.1699	No	cytoplasmicmembrane-boundedvesicle;cytoskeleton;"GO:0016023,IDA" /// cytoskeleton;	FILAGGRIN.
KPRP	IPI00514908	human	plasma and tumor		2	1							6	5	2.8365	0.01					No	22	93.3531	No	cytoplasm;	KERATINOCYTE PROLINE-RICH PROTEIN.
SERPINB12	IPI00033583 ; IPI00643202 ; IPI00789302	human	plasma and tumor		7	2			3	3											No	19.3333	38.2216	No	cytoplasm;	SERPIN B12.
PSMB8	IPI00000783 ; IPI00215824 ; IPI00552984 ; IPI00640155 ; IPI00893032	human	plasma and tumor		2	1							5	4	-0.389567	0.06					No	16.3333	31.3787	Yes	intracellular;cytoplasm;proteincomplex;cytosol;nucleus; /// proteincomplex;cytosol;nucleus;intracellular;cytoplasm; /// proteincomplex;cytosol;intracellular;	ISOFORM 1 OF PROTEASOME SUBUNIT BETA TYPE-8 PRECURSOR.
DDX21	IPI00015953 ; IPI00477179	human	plasma and tumor		2	1											5	3	-0.669027	0	No	51	45.6771	No	nucleolus;nucleus;	ISOFORM 1 OF NUCLEOLAR RNA HELICASE 2.
GGH	IPI00023728	human	plasma and tumor		1	1							5	4			1	1			Yes	20	36.6808	Yes	extracellularregion;lysosome;cytoplasmicmembrane-boundedvesicle;	GAMMA-GLUTAMYL HYDROLASE PRECURSOR.
PYCARD	IPI00001699 ; IPI00221360 ; IPI00221362	human	plasma and tumor		1	1							23	8	0.358454	0.08	16	6	0.810966	0.01	Yes	11	27.1182	Yes	intracellular;extracellularregion;cytoplasm;proteincomplex;cytosol; /// proteincomplex;cytosol;intracellular;extracellularregion;cytoplasm;	ISOFORM 1 OF APOPTOSIS-ASSOCIATED SPECK-LIKE PROTEIN CONTAINING A CARD.
SFRS2IP	IPI00181359 ; IPI00746412 ; IPI00795657	human	plasma and tumor						1	1			5	2	0.535332	0					No	75	67.7945	No	nucleoplasm;proteincomplex;nucleus;	SFRS2-INTERACTING PROTEIN.
FLG2	IPI00397801	human	plasma and tumor		32	8			7	4			79	25	1.88897	0.02	7	4	1.21759	0	not annotated	76	55.1601	No		FILAGGRIN-2.
DMKN	IPI00454602 ; IPI00890826	human	plasma and tumor		11	1							63	6			23	4			Yes	13	30.656	Yes	extracellularspace;extracellularregion;	ISOFORM 1 OF DERMOKINE PRECURSOR.
CALML5	IPI00021536	human	plasma and tumor		17	2			8	5			63	6			45	6			not annotated	9	39.4507	Yes		CALMODULIN-LIKE PROTEIN 5.
DECR1	IPI00003482 ; IPI00789705	human	plasma and tumor		1	1							4	3			4	4	0.599462	0.03	No	14.5	29.2087	Yes	mitochondrion;	2,4-DIENOYL-COA REDUCTASE, MITOCHONDRIAL PRECURSOR.
	IPI00743690	human	plasma and tumor						1	1	-0.356144	0	2	2	-0.604071	0	1	1	-0.0426443	0	not annotated	13	1.37805	Yes		SIMILAR TO CYCLOPHILIN A.
CKB	IPI00022977	human	plasma and tumor						1	1			5	5	1.55639	0					No	24	42.6493	No	cytoplasm;cytosol;mitochondrion;"GO:0005829,EXP"	CREATINE KINASE B-TYPE.
TGM1	IPI00305622	human	plasma and tumor		2	2			2	2			10	3			17	2			No	55	38.9307	Yes	cell;plasmamembrane;cytoskeleton;"GO:0005623,IDA"	PROTEIN-GLUTAMINE GAMMA-GLUTAMYLTRANSFERASE K.
CCDC86	IPI00012199 ; IPI00412260 ; IPI00446362	human	plasma and tumor		1	1							2	1			4	3	0.168123	0	No	13.3333	96.0803	No	nucleus;	COILED-COIL DOMAIN-CONTAINING PROTEIN 86.
ASPRV1	IPI00102281	human	plasma and tumor		1	1							29	3			3	1			No	15	53.3528	No	cell;	RETROVIRAL-LIKE ASPARTIC PROTEASE 1 PRECURSOR.
SERPINB4;SERPINB3	IPI00010303 ; IPI00307466 ; IPI00412407 ; IPI00796012 ; IPI00889694	human	plasma and tumor		3	1							128	14			95	12	0.234465	0	No	21.75	31.0692	Yes	cytoplasm;	SERPIN B4.
SERPINA1	IPI00305457 ; IPI00553177 ; IPI00790784	human	plasma and tumor						3	1							14	6			Yes	19.3333	25.1625	Yes	extracellularspace;nucleolus;nucleus;extracellularregion;cytoplasmicmembrane-boundedvesicle;"GO:0005576,EXP;GO:0005615,IMP;GO:0005634,IDA;GO:0005730,IDA;GO:0016023,EXP"	PRO2275.
CASP14	IPI00013885	human	plasma and tumor		3	3							12	7	0.454032	0	1	1	1.21759	0	No	20	49.9409	No	cytoplasm;nucleus;	CASPASE-14 PRECURSOR.
PRSS1;PRSS2	IPI00011694 ; IPI00011695 ; IPI00169276 ; IPI00815665	human	plasma and tumor		21	3			7	1			1	1							Yes	11	30.1818	Yes	extracellularregion; /// extracellularspace;extracellularregion;"GO:0005576,IDA;GO:0005615,IMP"	TRYPSIN-1 PRECURSOR.
TUFM	IPI00027107	human	plasma and tumor		2	1							26	7	-0.613532	0.11	55	9	-0.0426443	0.06	No	33	34.5798	Yes	mitochondrion;intracellular;"GO:0005739,IDA"	TU TRANSLATION ELONGATION FACTOR, MITOCHONDRIAL PRECURSOR.
OPTN	IPI00304189 ; IPI00514792 ; IPI00554537	human	plasma and tumor						1	1			5	3			2	2			No	49	49.85	No	cytoplasm;Golgiapparatus;"GO:0005737,IDA;GO:0005794,IDA"	ISOFORM 1 OF OPTINEURIN.
SAA4	IPI00019399	human	Plasma only	Yes	4	2															Yes	9	30.7338	Yes	extracellularregion;	SERUM AMYLOID A-4 PROTEIN PRECURSOR.
KLKB1	IPI00654888	human	Plasma only	Yes	51	8	-3.89336	4.37	2	2	-2.29278	0									Yes	48	39.4674	Yes	extracellularregion;cytoplasm;"GO:0005737,IDA"	PLASMA KALLIKREIN PRECURSOR.
F11	IPI00008556 ; IPI00216588	human	Plasma only		37	2	-4.44361	10.54													Yes	41	38.0181	Yes	extracellularregion;cell; /// cell;extracellularregion;	ISOFORM 1 OF COAGULATION FACTOR XI PRECURSOR.
C5	IPI00032291 ; IPI00816741	human	Plasma only						4	2											Yes	82.5	36.9997	Yes	extracellularspace;plasmamembrane;proteincomplex;extracellularregion;"GO:0005576,EXP" /// extracellularregion;	COMPLEMENT C5 PRECURSOR.
APOC2	IPI00021856	human	Plasma only		3	1			25	2											Yes	5	40.0951	No	extracellularspace;extracellularregion;"GO:0005576,EXP;GO:0005615,IDA;GO:0005615,IDA;GO:0005615,IDA;GO:0005615,IDA"	APOLIPOPROTEIN C-II PRECURSOR.
GAPDH	IPI00794605	human	Plasma only	Yes	38	3			10	3											not annotated	11	13.587	Yes		18 KDA PROTEIN.
PLUNC	IPI00009856	human	Plasma only		3	3															Yes	7	33.8551	Yes	extracellularregion;"GO:0005576,IDA"	PROTEIN PLUNC PRECURSOR.
	IPI00060800 ; IPI00748189	human	Plasma only		2	2															Yes	12.5	36.8579	Yes	extracellularregion;	UNCHARACTERIZED PROTEIN UNQ773/PRO1567 PRECURSOR.
LCN1	IPI00009650	human	Plasma only		2	2															Yes	13	27.1955	Yes	extracellularregion;	LIPOCALIN-1 PRECURSOR.
APOB	IPI00022229	human	Plasma only	Yes	1	1			2	2											Yes	311	35.8644	Yes	intracellular;extracellularspace;organelle;extracellularregion;endosome;plasmamembrane;cell;endoplasmicreticulum;cytoplasmicmembrane-boundedvesicle;"GO:0005576,EXP;GO:0005576,EXP;GO:0005576,EXP;GO:0005576,EXP;GO:0043226,EXP;GO:0005622,EXP;GO:0005886,EXP;G	APOLIPOPROTEIN B-100 PRECURSOR.
SERPINA3	IPI00550991 ; IPI00847635	human	Plasma only						2	2											Yes	28	42.1265	No	nucleus;intracellular;extracellularregion;	ALPHA-1-ANTICHYMOTRYPSIN PRECURSOR.
C20orf114	IPI00291410	human	Plasma only		3	3															Yes	28	40.8248	No	extracellularregion;	ISOFORM 1 OF LONG PALATE, LUNG AND NASAL EPITHELIUM CARCINOMA- ASSOCIATED PROTEIN 1 PRECURSOR.
F12	IPI00019581	human	Plasma only	Yes	9	2	-4.52982	2.46													Yes	33	47.9476	No	extracellularregion;	COAGULATION FACTOR XII PRECURSOR.
HRG	IPI00022371	human	Plasma only	Yes					6	2											Yes	25	49.9459	No	extracellularregion;cytoplasmicmembrane-boundedvesicle;"GO:0005576,EXP;GO:0016023,EXP"	HISTIDINE-RICH GLYCOPROTEIN PRECURSOR.
SMR3B	IPI00023011	human	Plasma only		2	2															Yes	2	79.2443	No	extracellularspace;extracellularregion;	SUBMAXILLARY GLAND ANDROGEN-REGULATED PROTEIN 3 HOMOLOG B PRECURSOR.
C4A	IPI00032258	human	Plasma only	Yes	76	12	-4.54535	17.92	6	3	-3.87873	0									Yes	99	45.8139	No	extracellularregion;"GO:0005576,EXP;GO:0005576,EXP;GO:0005576,EXP"	COMPLEMENT C4-A PRECURSOR.
C6orf174	IPI00647205	human	Plasma only		3	3															No	73	65.3649	No	cell;	UNCHARACTERIZED PROTEIN C6ORF174 PRECURSOR.
C1QB	IPI00477992 ; IPI00643948	human	Plasma only	Yes	9	2															Yes	13.5	17.0747	Yes	extracellularspace;proteincomplex;extracellularregion;"GO:0005576,EXP;GO:0005576,EXP"	COMPLEMENT COMPONENT 1, Q SUBCOMPONENT, B CHAIN PRECURSOR.
AMY2B;AMY1A;AMY1B;AMY1C;AMY2A	IPI00021447 ; IPI00025476 ; IPI00300786 ; IPI00646265 ; IPI00886843	human	Plasma only						3	2											Yes	26.25	21.7315	Yes	extracellularregion; /// extracellularspace;extracellularregion;	ALPHA-AMYLASE 2B PRECURSOR.
C20orf11	IPI00016634	human	Tumor only										2	1			5	2			No	18	42.8513	No	nucleus;	PROTEIN C20ORF11.
VIM	IPI00418471 ; IPI00552689	human	Tumor only										184	19	0.888969	0.05	248	19	0.0892673	0.04	No	26	58.0766	No	cytoskeleton;cytoplasm;"GO:0005737,IDA;GO:0005856,IDA" /// cytoskeleton;	VIMENTIN.
DNAJB4	IPI00003848 ; IPI00645574	human	Tumor only										6	3	0.340075	0.01	1	1			not annotated	18	47.093	No		DNAJ HOMOLOG SUBFAMILY B MEMBER 4.
UBE2L3	IPI00021347	human	Tumor only										20	4	0.251539	0.01	27	4	0.251539	0.03	No	9	45.2851	No	intracellular;proteincomplex;	UBIQUITIN-CONJUGATING ENZYME E2 L3.
PICALM	IPI00216184 ; IPI00290738 ; IPI00400849 ; IPI00784628 ; IPI00871365 ; IPI00871890 ; IPI00872089	human	Tumor only										11	7			12	5			No	26.3333	28.9506	Yes	cell;plasmamembrane;proteincomplex;organelle;cytoplasm;Golgiapparatus;"GO:0005886,IDA" /// plasmamembrane;proteincomplex;cytoplasm; /// proteincomplex;cytoplasm;	ISOFORM 2 OF PHOSPHATIDYLINOSITOL-BINDING CLATHRIN ASSEMBLY PROTEIN.
FLOT2	IPI00789008 ; IPI00795979 ; IPI00872619	human	Tumor only										5	2			3	3			No	40.3333	31.9333	Yes	plasmamembrane;cell;proteincomplex; /// cell;plasmamembrane;proteincomplex;"GO:0005623,IDA"	FLOTILLIN 2.
EIF4A3	IPI00009328	human	Tumor only										22	4			19	3			No	29	41.254	No	cytoplasm;nucleus;"GO:0005737,IDA"	EUKARYOTIC INITIATION FACTOR 4A-III.
RAE1	IPI00019733	human	Tumor only										6	4	0.152003	0	8	4	0.0740006	0	No	20	45.0364	No	cytoplasm;proteincomplex;nucleus;nuclearenvelope;cytoskeleton;"GO:0005635,EXP"	MRNA EXPORT FACTOR.
CAPZA1	IPI00005969 ; IPI00873484	human	Tumor only										37	10	0.321928	0.05	30	7	0.268817	0	No	19	43.0486	No	proteincomplex;cytoskeleton;	F-ACTIN-CAPPING PROTEIN SUBUNIT ALPHA-1.
PAFAH1B2	IPI00026546	human	Tumor only										8	3	-0.0143553	0.09	9	3	0.286304	0.02	No	13	35.0926	Yes	cytoplasm;	PLATELET-ACTIVATING FACTOR ACETYLHYDROLASE IB SUBUNIT BETA.
PSME2	IPI00384051 ; IPI00746205	human	Tumor only										37	6			26	5			No	23.5	30.5335	Yes	cytosol;proteincomplex;intracellular; /// proteincomplex;intracellular;	UNCHARACTERIZED PROTEIN PSME2.
GNB2L1	IPI00641950 ; IPI00848226	human	Tumor only										99	9	0.0439433	0.09	106	10	0.0291463	0.05	No	21.5	22.6726	Yes	cell;cytoplasm;	LUNG CANCER ONCOGENE 7.
FSTL1	IPI00029723	human	Tumor only										2	2			1	1			Yes	23	52.9899	No	extracellularspace;extracellularregion;"GO:0005576,EXP"	FOLLISTATIN-RELATED PROTEIN 1 PRECURSOR.
LSM12	IPI00410324 ; IPI00867714	human	Tumor only										2	2			1	1			not annotated	11	50.961	No		ISOFORM 1 OF PROTEIN LSM12 HOMOLOG.
SF3B2	IPI00477803	human	Tumor only										25	9			6	5			No	48	65.3054	No	nucleus;	PUTATIVE UNCHARACTERIZED PROTEIN DKFZP781L0540 (FRAGMENT).
FAM62B	IPI00409635 ; IPI00827920 ; IPI00893476	human	Tumor only										7	4			8	5			No	57.6667	44.0152	No	cell;plasmamembrane;	ISOFORM 2 OF EXTENDED SYNAPTOTAGMIN-2.
NACA	IPI00023748 ; IPI00797126 ; IPI00797259	human	Tumor only										36	5			27	3			No	15.5	63.1831	No	cytoplasm;proteincomplex;nucleus;	NASCENT POLYPEPTIDE-ASSOCIATED COMPLEX SUBUNIT ALPHA.
RAB18	IPI00014577 ; IPI00478787 ; IPI00479988 ; IPI00844361	human	Tumor only										5	3	0.234465	0	7	3	-0.475085	0.01	No	17.75	26.3915	Yes	intracellular;cellular_component;plasmamembrane; /// intracellular;	RAS-RELATED PROTEIN RAB-18.
RPL13A	IPI00304612 ; IPI00398949 ; IPI00398964 ; IPI00398983 ; IPI00432865	human	Tumor only										8	2	0	0.08	5	2	-0.250962	0	No	14.5	29.7123	Yes	cytosol;intracellular;ribosome;"GO:0005829,EXP;GO:0005829,EXP" /// intracellular;ribosome;	60S RIBOSOMAL PROTEIN L13A.
GMPPB	IPI00002496 ; IPI00030920 ; IPI00797050	human	Tumor only														3	3	0.184425	0	not annotated	19	44.7969	No		ISOFORM 2 OF MANNOSE-1-PHOSPHATE GUANYLTRANSFERASE BETA.
HBXIP	IPI00012831	human	Tumor only										18	4	1.2863	0.08					No	10	48.5775	No	cytoplasm;cytosol;"GO:0005829,IDA"	HEPATITIS B VIRUS X-INTERACTING PROTEIN.
DDX50	IPI00031554	human	Tumor only														4	2			No	49	57.573	No	nucleus;	ATP-DEPENDENT RNA HELICASE DDX50.
COQ9	IPI00385901 ; IPI00470631	human	Tumor only										3	2			1	1			No	13.5	51.0604	No	mitochondrion;	ISOFORM 2 OF UBIQUINONE BIOSYNTHESIS PROTEIN COQ9, MITOCHONDRIAL PRECURSOR.
ERMP1	IPI00257903	human	Tumor only										9	7			15	11	0.0740006	0	No	39	40.1929	No	cell;endoplasmicreticulum;	ENDOPLASMIC RETICULUM METALLOPEPTIDASE 1.
SRP54	IPI00009822	human	Tumor only										8	5			6	1			No	40	34.6448	Yes	nucleoplasm;cytoplasm;nucleolus;nucleus;"GO:0005730,IDA;GO:0005737,IDA"	SIGNAL RECOGNITION PARTICLE 54 KDA PROTEIN.
TUBA1B	IPI00387144	human	Tumor only										340	17	0.120294	0.26					No	23	37.3266	Yes	proteincomplex;cytoskeleton;	TUBULIN ALPHA-1B CHAIN.
NUP98	IPI00006038 ; IPI00216688 ; IPI00337395 ; IPI00337396 ; IPI00337397	human	Tumor only										5	4							No	67.2	27.9986	Yes	cell;nucleoplasm;proteincomplex;nucleus;nuclearenvelope;"GO:0005635,IDA;GO:0043234,IDA"	ISOFORM 1 OF NUCLEAR PORE COMPLEX PROTEIN NUP98-NUP96 PRECURSOR.
PDLIM5	IPI00553102 ; IPI00555593	human	Tumor only														12	6			not annotated	25	45.1456	No		PDZ AND LIM DOMAIN 5 ISOFORM B.
YBX1	IPI00031812	human	Tumor only										35	7			60	7			No	20	65.9062	No	nucleus;cytoplasm;	NUCLEASE-SENSITIVE ELEMENT-BINDING PROTEIN 1.
DSTN	IPI00473014 ; IPI00845388	human	Tumor only										60	8	0.104697	0.09	55	5	0.104697	0.08	No	13	42.8673	No	cytoskeleton;intracellular;cytoplasm;	DESTRIN.
RCN3	IPI00101037	human	Tumor only										7	5			7	4			No	14	41.164	No	intracellular;organelle;endoplasmicreticulum;	RETICULOCALBIN-3 PRECURSOR.
HNRNPA1	IPI00215965 ; IPI00465365 ; IPI00797148	human	Tumor only										88	8	0.358454	0.04	129	10	0.217591	0.08	No	21.5	41.107	No	nucleoplasm;nucleus;cytoplasm;"GO:0005654,IDA;GO:0005634,IDA;GO:0005737,IDA"	ISOFORM A1-B OF HETEROGENEOUS NUCLEAR RIBONUCLEOPROTEIN A1.
WBP11	IPI00170786	human	Tumor only										3	2							No	36	65.9892	No	nucleus;cytoplasm;	WW DOMAIN-BINDING PROTEIN 11.
WIBG	IPI00305092 ; IPI00790634	human	Tumor only										7	3			7	4			not annotated	11	67.5916	No		ISOFORM 1 OF PROTEIN WIBG HOMOLOG.
RPL4	IPI00003918 ; IPI00793341 ; IPI00794087 ; IPI00794736	human	Tumor only										65	10	0.666576	0.08	34	7	-0.0285692	0.12	No	14	31.4896	No	intracellular;ribosome;cytosol;"GO:0005829,EXP"	60S RIBOSOMAL PROTEIN L4.
ARL8B	IPI00018871 ; IPI00789069	human	Tumor only										7	3			1	1			No	9.5	47.9769	No	intracellular;endosome;cell;lysosome;cytoplasm;cytoskeleton;"GO:0005737,IDA;GO:0005623,IDA;GO:0005856,IDA"	ADP-RIBOSYLATION FACTOR-LIKE PROTEIN 8B.
STX4	IPI00029730 ; IPI00644806 ; IPI00797749 ; IPI00798227	human	Tumor only										2	1			6	4			Yes	15.6667	45.9064	No	cell;plasmamembrane;cytosol;extracellularregion;vacuole;"GO:0005829,EXP;GO:0005886,IDA;GO:0005886,IDA;GO:0005576,IDA" /// plasmamembrane;cytoplasm;	SYNTAXIN-4.
PSMD14	IPI00024821	human	Tumor only										14	7			25	6	0.286304	0	No	16	41.4384	No	intracellular;cytoplasm;cytosol;nucleus;proteincomplex;"GO:0005634,IDA;GO:0005737,IDA"	26S PROTEASOME NON-ATPASE REGULATORY SUBUNIT 14.
KIAA1522	IPI00001632 ; IPI00641889 ; IPI00872465	human	Tumor only										7	3			3	2			not annotated	37.3333	70.821	No		HYPOTHETICAL PROTEIN LOC57648.
PHGDH	IPI00011200 ; IPI00642548	human	Tumor only										25	11	0.0291463	0.13	33	13	0.37707	0.06	Yes	25	28.0688	Yes	extracellularregion;	D-3-PHOSPHOGLYCERATE DEHYDROGENASE.
PABPN1	IPI00005792 ; IPI00414963	human	Tumor only										4	3	0.494109	0	2	1			No	14.5	57.3794	No	cytoplasm;nucleoplasm;nucleus;"GO:0005634,IDA;GO:0005654,EXP;GO:0005737,IDA" /// nucleoplasm;nucleus;cytoplasm;"GO:0005634,IDA;GO:0005654,EXP;GO:0005737,IDA"	ISOFORM 1 OF POLYADENYLATE-BINDING PROTEIN 2.
STAT3	IPI00306436 ; IPI00412752 ; IPI00784414	human	Tumor only										34	8	0.862496	0.02	27	7	0.268817	0.03	No	48	47.7687	No	nucleus;cytoplasm;"GO:0005634,IDA"	ISOFORM DEL-701 OF SIGNAL TRANSDUCER AND ACTIVATOR OF TRANSCRIPTION 3.
RSU1	IPI00017256 ; IPI00377066 ; IPI00478433 ; IPI00847168	human	Tumor only										4	3			3	2			not annotated	18	34.425	Yes		RAS SUPPRESSOR PROTEIN 1.
PFKP	IPI00009790	human	Tumor only										56	14	-0.378512	0.14	60	13	0.136062	0.07	No	46	32.2764	Yes	cytoplasm;proteincomplex;cytosol;"GO:0005829,EXP"	6-PHOSPHOFRUCTOKINASE TYPE C.
PSMB1	IPI00025019 ; IPI00556291	human	Tumor only										18	6	0.0740006	0	19	5	-0.903038	0.03	No	14.5	33.5374	Yes	intracellular;cytoplasm;proteincomplex;cytosol;nucleus; /// proteincomplex;cytosol;intracellular;cytoplasm;	PROTEASOME SUBUNIT BETA TYPE-1 PRECURSOR.
CFDP1	IPI00007306 ; IPI00646794	human	Tumor only										5	3							No	13.5	66.9812	No	cellular_component;	ISOFORM 1 OF CRANIOFACIAL DEVELOPMENT PROTEIN 1.
NQO2	IPI00219129 ; IPI00515016 ; IPI00640851 ; IPI00871850	human	Tumor only										3	3			1	1			No	15.5	32.6041	Yes	cytoplasm;	RIBOSYLDIHYDRONICOTINAMIDE DEHYDROGENASE.
SNRPB;SNRPN	IPI00027285 ; IPI00220360 ; IPI00329512 ; IPI00384173 ; IPI00395674 ; IPI00785142 ; IPI00793157 ; IPI00844420 ; IPI00877103	human	Tumor only										12	3	0.0740006	0.03	2	1			No	14.4	43.7611	No	nucleoplasm;cytosol;nucleus;cytoplasm;"GO:0005654,EXP;GO:0005829,EXP" /// nucleus; /// intracellular; /// nucleus;intracellular;cytoplasm;	ISOFORM SM-B' OF SMALL NUCLEAR RIBONUCLEOPROTEIN-ASSOCIATED PROTEINS B AND B'.
S100A13	IPI00016179	human	Tumor only										3	2			1	1			No	7	37.4316	Yes	cellular_component;	PROTEIN S100-A13.
GLRX3	IPI00008552	human	Tumor only										5	3	0.37707	0	6	3	0.200913	0	No	22	38.8361	Yes	cytoplasm;	GLUTAREDOXIN-3.
HCFC1	IPI00019848 ; IPI00219326 ; IPI00641743 ; IPI00847789	human	Tumor only										8	7			3	2			No	58.5	39.9185	No	cytoplasm;nucleus;"GO:0005634,IDA;GO:0005634,IDA;GO:0005737,IDA" /// nucleus;cytoplasm;"GO:0005634,IDA;GO:0005634,IDA;GO:0005737,IDA"	ISOFORM 1 OF HOST CELL FACTOR.
IFITM2;IFITM1;IFITM3	IPI00008922 ; IPI00300620 ; IPI00303726 ; IPI00748544 ; IPI00871741 ; IPI00873794	human	Tumor only										5	2			1	1			No	3.75	44.6308	No	cell; /// cell;plasmamembrane; /// cell;plasmamembrane;Golgiapparatus;"GO:0005794,IDA;GO:0005886,IDA"	INTERFERON-INDUCED TRANSMEMBRANE PROTEIN 2.
AKR1B1	IPI00413641 ; IPI00556258	human	Tumor only										8	4	0.0740006	0.19	5	4	0.251539	0.01	Yes	20.5	36.5772	Yes	extracellularspace;cytosol;cytoplasm;"GO:0005829,EXP"	ALDOSE REDUCTASE.
DAG1	IPI00028911	human	Tumor only														2	2			Yes	48	50.1365	No	proteinaceousextracellularmatrix;plasmamembrane;cell;proteincomplex;cytoskeleton;extracellularregion;cytoplasm;	DYSTROGLYCAN PRECURSOR.
TIMM50	IPI00418497 ; IPI00656071	human	Tumor only										3	2			3	3			No	20.5	50.6649	No	nucleoplasm;cell;proteincomplex;nucleus;mitochondrion;"GO:0043234,IPI;GO:0005739,IPI;GO:0005654,IDA"	ISOFORM 2 OF IMPORT INNER MEMBRANE TRANSLOCASE SUBUNIT TIM50, MITOCHONDRIAL PRECURSOR.
PPM1A;PPM1B	IPI00020950 ; IPI00026612 ; IPI00216196 ; IPI00216507 ; IPI00651725 ; IPI00651767 ; IPI00743802	human	Tumor only										2	2			1	1			No	29	30.5043	Yes	cell;proteincomplex;	ISOFORM ALPHA-1 OF PROTEIN PHOSPHATASE 1A.
ASS1	IPI00020632 ; IPI00514341	human	Tumor only										10	4	-0.333424	0	19	3	0.621488	0.09	No	21.5	36.1012	Yes	cytoplasm;	ARGININOSUCCINATE SYNTHASE.
PLS3	IPI00216694	human	Tumor only										97	25	0.217591	0.08	96	19	0.395929	0.08	No	44	32.58	Yes	cytoplasm;	PLASTIN 3.
DYNLRB2;DYNLRB1	IPI00178188 ; IPI00412497 ; IPI00643583	human	Tumor only										9	4			5	2			No	8	33.1083	No	proteincomplex;cytoskeleton;cytoplasm;	DYNEIN LIGHT CHAIN ROADBLOCK-TYPE 2.
RPL17	IPI00413324 ; IPI00478208	human	Tumor only										40	7	0.358454	0.03	31	5	0.621488	0.01	No	14	59.1397	No	cytosol;intracellular;ribosome;"GO:0005829,EXP" /// intracellular;ribosome;	60S RIBOSOMAL PROTEIN L17.
GALNT2	IPI00004669	human	Tumor only										1	1			3	2			Yes	40	49.4827	No	extracellularregion;cytoplasm;cell;Golgiapparatus;"GO:0005794,IDA;GO:0005737,IDA"	POLYPEPTIDE N-ACETYLGALACTOSAMINYLTRANSFERASE 2.
P4HA1	IPI00009923 ; IPI00218682	human	Tumor only										5	3			9	5			No	38.5	31.3751	Yes	intracellular;organelle;endoplasmicreticulum;mitochondrion;"GO:0005739,IDA" /// mitochondrion;intracellular;organelle;endoplasmicreticulum;"GO:0005739,IDA"	ISOFORM 1 OF PROLYL 4-HYDROXYLASE SUBUNIT ALPHA-1 PRECURSOR.
SEPHS1	IPI00029056 ; IPI00640051	human	Tumor only										12	8	1.32193	0.19	10	7	0.785875	0.05	not annotated	17	33.2717	Yes		SELENIDE, WATER DIKINASE 1.
EPN1;EPN3	IPI00002495 ; IPI00027082 ; IPI00300584 ; IPI00386833 ; IPI00397365 ; IPI00647389 ; IPI00718969	human	Tumor only										2	2			3	3			No	20.8333	43.2067	No	plasmamembrane;cytoplasm;nucleus;"GO:0005886,EXP;GO:0005886,EXP;GO:0005886,EXP" /// plasmamembrane;nucleus;cytoplasm;"GO:0005886,EXP;GO:0005886,EXP;GO:0005886,EXP" /// nucleus;organelle;cytoplasm;	ISOFORM 1 OF EPSIN-1.
PFDN6	IPI00005657 ; IPI00639894	human	Tumor only										7	3			17	3			No	13	41.2495	No	proteincomplex;cytosol;	PREFOLDIN SUBUNIT 6.
GORASP2	IPI00031241 ; IPI00743931	human	Tumor only										3	3			1	1			No	12.5	54.5381	No	cell;Golgiapparatus;	ISOFORM 2 OF GOLGI REASSEMBLY-STACKING PROTEIN 2.
PSMB2	IPI00028006 ; IPI00844375	human	Tumor only										13	4			2	1			No	15	42.3328	No	proteincomplex;cytosol;nucleus;intracellular;cytoplasm; /// proteincomplex;cytosol;intracellular;cytoplasm;	PROTEASOME SUBUNIT BETA TYPE-2.
PTBP1	IPI00179964 ; IPI00183626 ; IPI00334175 ; IPI00413691	human	Tumor only										92	12	0.104697	0.06	197	10	-0.0565835	0.09	No	21	34.1117	Yes	nucleolus;nucleoplasm;nucleus; /// nucleus;	ISOFORM 1 OF POLYPYRIMIDINE TRACT-BINDING PROTEIN 1.
ARPC5L	IPI00414554	human	Tumor only										4	2			7	3			No	14	43.8013	No	cytoskeleton;cytoplasm;	ACTIN-RELATED PROTEIN 2/3 COMPLEX SUBUNIT 5-LIKE PROTEIN.
ACOX1	IPI00296907 ; IPI00477729	human	Tumor only										3	2			6	6			No	42	39.7262	No	mitochondrion;peroxisome;	ISOFORM 1 OF PEROXISOMAL ACYL-COENZYME A OXIDASE 1.
ADPRHL2	IPI00015865 ; IPI00844174	human	Tumor only										4	3			5	4	0.577767	0	No	19.5	33.0989	Yes	cytoplasm;nucleus;	POLY(ADP-RIBOSE) GLYCOHYDROLASE ARH3.
ISCU	IPI00022240 ; IPI00164885 ; IPI00890793	human	Tumor only										4	2	0.473931	0					No	12.6667	19.5894	Yes	cytoplasm;cytosol;nucleus;mitochondrion;"GO:0005737,IDA;GO:0005739,IDA;GO:0005829,IDA" /// cytosol;nucleus;mitochondrion;cytoplasm;"GO:0005737,IDA;GO:0005739,IDA;GO:0005829,IDA"	ISOFORM 1 OF IRON-SULFUR CLUSTER ASSEMBLY ENZYME ISCU, MITOCHONDRIAL PRECURSOR.
CCDC50	IPI00217059 ; IPI00383423 ; IPI00871979 ; IPI00872183	human	Tumor only										4	2							No	34	66.0588	No	cytoplasm;	ISOFORM 2 OF COILED-COIL DOMAIN-CONTAINING PROTEIN 50.
SFRS4	IPI00000015	human	Tumor only										3	2							No	28	110.756	No	nucleoplasm;nucleus;	SPLICING FACTOR, ARGININE/SERINE-RICH 4.
CAPRIN1	IPI00030910 ; IPI00783872 ; IPI00873926	human	Tumor only										25	9			12	4			No	23.6667	52.8786	No	cell;plasmamembrane;cytoplasm;	GPI-ANCHORED MEMBRANE PROTEIN 1.
ATP6V1D	IPI00001568 ; IPI00385952	human	Tumor only										3	3							No	12.5	35.3644	Yes	cell;proteincomplex;	VACUOLAR PROTON PUMP SUBUNIT D.
RAB8B	IPI00024282	human	Tumor only														3	2			No	19	31.3788	Yes	intracellular;cellular_component;plasmamembrane;	RAS-RELATED PROTEIN RAB-8B.
DHX9	IPI00844578	human	Tumor only										75	21	-0.495695	0.39	56	22	-1.54597	1.09	No	81	39.2585	Yes	nucleolus;nucleus;intracellular;microtubuleorganizingcenter;cytoplasm;"GO:0005634,IDA;GO:0005815,IDA"	ATP-DEPENDENT RNA HELICASE A.
MRPL33	IPI00006864 ; IPI00873631	human	Tumor only										5	2	0.200913	0	1	1			No	5	49.2046	No	intracellular;ribosome;mitochondrion; /// intracellular;ribosome;	MITOCHONDRIAL 39S RIBOSOMAL PROTEIN L33.
FLOT1	IPI00027438 ; IPI00607626 ; IPI00789691 ; IPI00791583 ; IPI00792079 ; IPI00892615 ; IPI00892872 ; IPI00892989 ; IPI00893081 ; IPI00893481 ; IPI00894145 ; IPI00894525	human	Tumor only										3	3			2	2			No	17.8182	29.0974	Yes	cell;plasmamembrane;proteincomplex;microtubuleorganizingcenter;cytoplasmicmembrane-boundedvesicle;Golgiapparatus;"GO:0005794,IDA;GO:0005815,IDA;GO:0005815,IDA" /// cell;plasmamembrane;proteincomplex;Golgiapparatus;"GO:0005794,IDA;GO:0005886,IDA" /// cell;	FLOTILLIN-1.
CFL2	IPI00413344	human	Tumor only										47	3			58	3			No	14	30.197	Yes	nucleus;cytoskeleton;intracellular;cytoplasm;	COFILIN-2.
FIS1	IPI00007052	human	Tumor only										2	2	1.152	0	1	1			No	9	27.5086	Yes	cell;mitochondrion;peroxisome;"GO:0005777,IDA;GO:0005739,IDA"	MITOCHONDRIAL FISSION 1 PROTEIN.
RPS26	IPI00186712 ; IPI00655650	human	Tumor only										25	5	0.434403	0.14	17	4	-0.15056	0.22	No	7.5	47.3991	No	intracellular;ribosome; /// cytosol;intracellular;ribosome;"GO:0005829,EXP;GO:0005840,IDA;GO:0005829,IDA;GO:0005840,IDA;GO:0005829,IDA"	NOVEL PROTEIN SIMILAR TO RIBOSOMAL PROTEIN 26 RPS26.
RAB2B	IPI00102896	human	Tumor only										9	2							No	16	46.8144	No	plasmamembrane;intracellular;endoplasmicreticulum;Golgiapparatus;	RAS-RELATED PROTEIN RAB-2B.
PNN	IPI00002649 ; IPI00789041	human	Tumor only										5	4			3	2			No	44	98.6747	No	nucleoplasm;plasmamembrane;cytoplasm;nucleus;cytoskeleton; /// nucleoplasm;plasmamembrane;nucleus;cytoskeleton;cytoplasm;	ISOFORM 2 OF PININ.
ETFA	IPI00010810	human	Tumor only										17	7			54	8			No	25	27.4529	Yes	mitochondrion;	ELECTRON TRANSFER FLAVOPROTEIN SUBUNIT ALPHA, MITOCHONDRIAL PRECURSOR.
C20orf77	IPI00009659 ; IPI00797536	human	Tumor only										6	6			6	3			not annotated	17	50.4052	No		UNCHARACTERIZED PROTEIN C20ORF77.
C14orf166	IPI00006980 ; IPI00792100	human	Tumor only										8	5			7	3			No	20.5	39.718	No	cytoplasm;nucleus;	UPF0568 PROTEIN C14ORF166.
	IPI00033494 ; IPI00220573 ; IPI00376572 ; IPI00604523 ; IPI00888129 ; IPI00888438	human	Tumor only										38	6	0.304006	0.05	50	5	0.136062	0.04	No	13.25	30.4762	Yes	cell;proteincomplex;cytoskeleton; /// proteincomplex;cytoskeleton;	MYOSIN REGULATORY LIGHT CHAIN.
2010-09-11	IPI00019376	human	Tumor only										4	4	0.217591	0	9	2			No	30	44.2851	No	cytoplasm;proteincomplex;nucleus;cytoskeleton;"GO:0005856,IDA;GO:0005634,IDA;GO:0005737,IDA"	SEPTIN-11.
METAP1	IPI00022239	human	Tumor only										5	2	0.434403	0.26	5	3	-0.378512	0.29	No	22	42.9899	No	cytoplasm;	METHIONINE AMINOPEPTIDASE 1.
UBE2G1	IPI00219783 ; IPI00873435	human	Tumor only										3	2			1	1			not annotated	13	46.7641	No		UBIQUITIN-CONJUGATING ENZYME E2 G1.
ATG3	IPI00022254 ; IPI00449201	human	Tumor only										3	2							No	16	43.7296	No	cytoplasm;cytosol;proteincomplex;"GO:0005737,IPI;GO:0043234,IPI;GO:0005829,IDA" /// cytosol;proteincomplex;cytoplasm;"GO:0005737,IPI;GO:0043234,IPI;GO:0005829,IDA"	ISOFORM 1 OF AUTOPHAGY-RELATED PROTEIN 3.
PTGFRN	IPI00022048 ; IPI00871938	human	Tumor only										30	9	-0.226509	0.01	7	3	0.736966	0.04	No	59.5	38.9125	No	cell;endoplasmicreticulum;Golgiapparatus;	PROSTAGLANDIN F2 RECEPTOR NEGATIVE REGULATOR PRECURSOR.
PDLIM2	IPI00007983 ; IPI00386717 ; IPI00396593 ; IPI00792605	human	Tumor only										10	5	0.304006	0.05					No	30.5	67.733	No	cell;cytoplasm;nucleus;cytoskeleton;"GO:0005623,IDA" /// cell;nucleus;cytoskeleton;cytoplasm;"GO:0005623,IDA"	ISOFORM 3 OF PDZ AND LIM DOMAIN PROTEIN 2.
ASNA1	IPI00013466	human	Tumor only										2	2			3	2			No	18	40.5483	No	cytoplasm;nucleolus;cell;	ARSENICAL PUMP-DRIVING ATPASE.
LARP1	IPI00185919 ; IPI00411690 ; IPI00643027	human	Tumor only										2	2							not annotated	76.6667	59.6279	No		ISOFORM 1 OF LA-RELATED PROTEIN 1.
KHDRBS1	IPI00008575 ; IPI00082310 ; IPI00385834 ; IPI00479209	human	Tumor only										13	3			12	3			No	27	52.9113	No	cell;nucleus;"GO:0005634,IDA;GO:0005623,IDA"	ISOFORM 1 OF KH DOMAIN-CONTAINING, RNA-BINDING, SIGNAL TRANSDUCTION- ASSOCIATED PROTEIN 1.
EEA1	IPI00329536	human	Tumor only										10	9			2	1			No	122	54.1753	No	plasmamembrane;cell;proteincomplex;cytosol;intracellular;endosome;cytoplasm;"GO:0005829,IDA;GO:0005886,IDA"	EARLY ENDOSOME ANTIGEN 1.
PPME1	IPI00007694 ; IPI00412156 ; IPI00412157 ; IPI00877000	human	Tumor only										1	1			3	2			not annotated	22	36.7347	No		ISOFORM 1 OF PROTEIN PHOSPHATASE METHYLESTERASE 1.
THOC4	IPI00328840	human	Tumor only										43	6			14	4			No	19	46.0405	No	nucleus;cytoplasm;	THO COMPLEX SUBUNIT 4.
SNRPC	IPI00013396 ; IPI00641788	human	Tumor only										11	2	0.434403	0.01	5	2	0.415037	0.02	No	6	68.0472	No	nucleus; /// nucleus;intracellular;	U1 SMALL NUCLEAR RIBONUCLEOPROTEIN C.
NUCKS1	IPI00022145 ; IPI00872944	human	Tumor only										2	1			16	4			No	18.5	72.2916	No	nucleus;	ISOFORM 1 OF NUCLEAR UBIQUITOUS CASEIN AND CYCLIN-DEPENDENT KINASES SUBSTRATE.
PLEC1	IPI00014898 ; IPI00186711 ; IPI00398002 ; IPI00398775 ; IPI00398776 ; IPI00398777 ; IPI00398778 ; IPI00398779 ; IPI00420096 ; IPI00887421	human	Tumor only										491	96	-0.214125	0.21	604	96	0.0144996	0.09	No	341.667	54.0857	No	plasmamembrane;cytoplasm;cytoskeleton; /// plasmamembrane;cytoskeleton;cytoplasm;	ISOFORM 1 OF PLECTIN-1.
MSH2	IPI00017303 ; IPI00893933	human	Tumor only														2	2			No	57.5	37.0163	Yes	proteincomplex;nucleus;"GO:0005634,IDA;GO:0043234,IDA;GO:0005634,IDA;GO:0043234,IDA" /// proteincomplex;nucleus;	DNA MISMATCH REPAIR PROTEIN MSH2.
RPL15	IPI00470528 ; IPI00550032	human	Tumor only										74	6			57	6			No	17	51.0417	No	cytosol;intracellular;ribosome;"GO:0005829,EXP" /// intracellular;ribosome;	60S RIBOSOMAL PROTEIN L15.
ZC3H15	IPI00479433	human	Tumor only										8	5	0.340075	0	3	1			not annotated	33	33.1711	Yes		47 KDA PROTEIN.
EIF4H	IPI00014263	human	Tumor only										16	4	0.514573	0.02	17	4	0.37707	0.01	No	23	39.6843	Yes	cytoplasm;proteincomplex;cytosol;"GO:0005829,EXP"	ISOFORM LONG OF EUKARYOTIC TRANSLATION INITIATION FACTOR 4H.
PPT1	IPI00002412 ; IPI00514248 ; IPI00514424	human	Tumor only										5	4	1.8365	0	1	1	0.37707	0	Yes	17	37.5267	No	extracellularspace;extracellularregion;lysosome;cell;cytosol;nucleus;cytoplasmicmembrane-boundedvesicle;Golgiapparatus;"GO:0005576,IDA;GO:0005634,IDA;GO:0005764,IDA;GO:0005764,IDA;GO:0005794,IDA;GO:0016023,IDA;GO:0005623,IDA;GO:0005623,IDA"	PALMITOYL-PROTEIN THIOESTERASE 1 PRECURSOR.
VAT1	IPI00156689	human	Tumor only										15	5	0.454032	0.06	26	12	0.494109	0.01	No	22	36.9644	Yes	cell;	SYNAPTIC VESICLE MEMBRANE PROTEIN VAT-1 HOMOLOG.
ENAH	IPI00374054 ; IPI00411623 ; IPI00646954 ; IPI00749432 ; IPI00783772 ; IPI00871394	human	Tumor only										12	7	0.268817	0	38	9	0.971431	0.04	No	23.6667	58.8981	No	cell;plasmamembrane;cytoskeleton;cellular_component;cytoplasm;	ISOFORM 2 OF PROTEIN ENABLED HOMOLOG.
SUB1	IPI00221222	human	Tumor only										10	3			22	3			No	11	45.9441	No	nucleolus;nucleoplasm;proteincomplex;nucleus;"GO:0005654,IDA;GO:0043234,IDA;GO:0005730,IDA"	ACTIVATED RNA POLYMERASE II TRANSCRIPTIONAL COACTIVATOR P15.
MESDC2	IPI00399089	human	Tumor only										2	2			16	2			No	15	50.265	No	cellular_component;	MESODERM DEVELOPMENT CANDIDATE 2.
HIST2H2AA3;HIST2H2AA4	IPI00216457	human	Tumor only										193	6			124	5			No	7	53.6831	No	nucleus;chromosome;	HISTONE H2A TYPE 2-A.
DCTN4	IPI00550852	human	Tumor only										4	3			1	1			No	27	52.3872	No	nucleus;cytoskeleton;microtubuleorganizingcenter;cytoplasm;	DYNACTIN SUBUNIT 4.
SLC25A22;SLC25A18	IPI00003004 ; IPI00027826 ; IPI00795087	human	Tumor only										2	2	0.251539	0	2	1	0.473931	0	No	16.6667	21.5073	Yes	cell;mitochondrion;"GO:0005739,IDA" /// cell;mitochondrion;	MITOCHONDRIAL GLUTAMATE CARRIER 1.
DAZAP1	IPI00165230 ; IPI00335930	human	Tumor only										22	6	0.358454	0.03	13	6	0.321928	0.02	No	15	48.9034	No	nucleus;cytoplasm;	ISOFORM 1 OF DAZ-ASSOCIATED PROTEIN 1.
SF3B5	IPI00010404	human	Tumor only										6	3			4	2			No	6	38.8081	Yes	nucleus;	SPLICING FACTOR 3B SUBUNIT 5.
ITGAV	IPI00027505 ; IPI00555991	human	Tumor only										19	11	0.152003	0.28	12	5	0.234465	0.04	No	68.5	37.2679	Yes	plasmamembrane;proteincomplex;cytoplasm;"GO:0005737,IDA;GO:0005886,IDA"	ISOFORM 1 OF INTEGRIN ALPHA-V PRECURSOR.
TEGT	IPI00022748 ; IPI00847321	human	Tumor only										2	2			1	1			No	6.5	34.7089	Yes	plasmamembrane;cell;endoplasmicreticulum;nucleus; /// cell;	BAX INHIBITOR 1.
CALM1;CALM2;CALM3	IPI00075248	human	Tumor only										66	4			46	5			No	9	28.2074	Yes	plasmamembrane;cytosol;cytoskeleton;microtubuleorganizingcenter;cytoplasm;"GO:0005856,IDA;GO:0005815,IDA;GO:0005829,EXP;GO:0005829,EXP;GO:0005829,EXP;GO:0005856,IDA"	CALMODULIN.
RFC2	IPI00017412 ; IPI00218280	human	Tumor only										3	2			2	2			No	27	41.4921	No	nucleoplasm;proteincomplex;nucleus;chromosome;"GO:0005654,EXP;GO:0005694,IDA;GO:0043234,IDA"	ISOFORM 1 OF REPLICATION FACTOR C SUBUNIT 2.
RPL27	IPI00219155 ; IPI00382885	human	Tumor only										29	5			17	6			No	9.5	20.8574	Yes	cytosol;intracellular;ribosome;"GO:0005829,EXP" /// intracellular;ribosome;	60S RIBOSOMAL PROTEIN L27.
PMPCB	IPI00289535	human	Tumor only										3	2	-0.31034	0	3	2	0.395929	0	No	31	41.9996	No	mitochondrion;	MITOCHONDRIAL-PROCESSING PEPTIDASE SUBUNIT BETA, MITOCHONDRIAL PRECURSOR.
DDX5	IPI00017617	human	Tumor only										20	8	0.621488	0.1	19	8	0.713119	0.32	No	42	39.4339	Yes	nucleus;	PROBABLE ATP-DEPENDENT RNA HELICASE DDX5.
EIF3G	IPI00290460	human	Tumor only										12	5			3	2			No	24	39.156	Yes	cytosol;"GO:0005829,EXP"	EUKARYOTIC TRANSLATION INITIATION FACTOR 3 SUBUNIT G.
TCEB1	IPI00300341 ; IPI00791185 ; IPI00796346	human	Tumor only										2	1			2	2	0.321928	0	No	7	27.1598	Yes	nucleoplasm;cytosol;nucleus;"GO:0005654,EXP;GO:0005829,EXP;GO:0005829,EXP"	TRANSCRIPTION ELONGATION FACTOR B POLYPEPTIDE 1.
EIF2B4	IPI00005979 ; IPI00220232 ; IPI00556659 ; IPI00654843 ; IPI00893055	human	Tumor only										7	2			2	1			No	22.75	50.2004	No	cytoplasm;proteincomplex;"GO:0005737,IDA;GO:0005737,IDA;GO:0043234,IDA;GO:0005737,IDA;GO:0043234,IDA" /// proteincomplex;cytoplasm;"GO:0005737,IDA;GO:0005737,IDA;GO:0043234,IDA;GO:0005737,IDA;GO:0043234,IDA"	ISOFORM 1 OF TRANSLATION INITIATION FACTOR EIF-2B SUBUNIT DELTA.
RPS19	IPI00215780	human	Tumor only										32	7			24	4			No	14	33.1138	Yes	nucleolus;cytosol;nucleus;intracellular;ribosome;"GO:0005730,IDA;GO:0005829,EXP;GO:0005840,IDA;GO:0005829,IDA"	40S RIBOSOMAL PROTEIN S19.
CSTF3	IPI00015195	human	Tumor only										5	4			4	4			No	51	41.5114	No	intracellular;nucleus;	CLEAVAGE STIMULATION FACTOR 77 KDA SUBUNIT.
LAMB1	IPI00013976 ; IPI00853454	human	Tumor only										5	4	1.51457	0.04	15	9	-0.344828	0.17	Yes	96.5	43.4772	No	extracellularregion;proteinaceousextracellularmatrix;plasmamembrane;cytoplasm;proteincomplex;cytoskeleton;"GO:0005578,IDA;GO:0005578,IDA;GO:0043234,IDA;GO:0005737,IDA;GO:0005578,IDA;GO:0043234,IDA;GO:0005886,IDA;GO:0005737,IDA;GO:0005856,IDA;GO:0005578,ID	LAMININ SUBUNIT BETA-1 PRECURSOR.
2010-09-07	IPI00033025 ; IPI00816201 ; IPI00873656	human	Tumor only										11	4	0.321928	0.04	40	6	0.415037	0.03	No	29.5	45.2525	No	cell;proteincomplex;nucleus;cytoskeleton;cytoplasm;"GO:0005856,IDA;GO:0005634,IDA" /// cell;	ISOFORM 1 OF SEPTIN-7.
2010-09-08	IPI00022082 ; IPI00479741 ; IPI00549434 ; IPI00658113 ; IPI00658185 ; IPI00658216	human	Tumor only										12	5							No	30.75	48.2066	No	cytoplasm;proteincomplex;cytoskeleton; /// proteincomplex;cytoskeleton;cytoplasm;	ISOFORM 2 OF SEPTIN-8.
AP1M1	IPI00032516	human	Tumor only										3	3			3	2			No	35	39.9314	Yes	cell;proteincomplex;cytosol;organelle;cytoplasm;Golgiapparatus;"GO:0005829,EXP"	AP-1 COMPLEX SUBUNIT MU-1.
DHRS7	IPI00006957 ; IPI00339238 ; IPI00470418	human	Tumor only										2	1			4	3	0.0892673	0	not annotated	20.3333	39.2832	Yes		ISOFORM 1 OF DEHYDROGENASE/REDUCTASE SDR FAMILY MEMBER 7 PRECURSOR.
SNX2	IPI00299095	human	Tumor only										2	2			6	2			No	36	53.2154	No	cytoplasm;"GO:0005737,IDA"	SORTING NEXIN-2.
PRMT1	IPI00018522 ; IPI00215734 ; IPI00382516	human	Tumor only										9	4			9	4			No	22.5	42.3589	No	cytoplasm;nucleus;"GO:0005634,IDA" /// nucleus;cytoplasm;"GO:0005634,IDA"	HMT1 HNRNP METHYLTRANSFERASE-LIKE 2 ISOFORM 1.
WDR57	IPI00006723 ; IPI00385642	human	Tumor only										1	1			7	2			No	14.5	35.0866	Yes	intracellular;nucleus;	WD REPEAT-CONTAINING PROTEIN 57.
SSR1	IPI00301021 ; IPI00449669	human	Tumor only										10	4			3	1			No	10	55.1533	No	cell;endoplasmicreticulum;	ISOFORM 1 OF TRANSLOCON-ASSOCIATED PROTEIN SUBUNIT ALPHA PRECURSOR.
GTF2F2	IPI00477686 ; IPI00876896	human	Tumor only										5	3							No	18	44.0852	No	nucleoplasm;proteincomplex;nucleus;cytoskeleton;"GO:0005654,EXP;GO:0005654,EXP;GO:0005654,EXP;GO:0005654,EXP;GO:0005654,EXP;GO:0005654,EXP;GO:0005654,EXP;GO:0005856,IDA"	GENERAL TRANSCRIPTION FACTOR IIF SUBUNIT 2.
TUBB	IPI00011654 ; IPI00645452	human	Tumor only										377	18	0.268817	0.09	500	19	0.136062	0.06	No	20.5	37.5773	Yes	cytoplasm;proteincomplex;cytoskeleton; /// proteincomplex;cytoskeleton;cytoplasm;	TUBULIN BETA CHAIN.
EEF1A1	IPI00396485	human	Tumor only										349	12	0.251539	0.13	337	14	0.304006	0.12	No	27	27.0273	Yes	proteincomplex;cytosol;cytoplasm;"GO:0005829,EXP"	ELONGATION FACTOR 1-ALPHA 1.
TPM3	IPI00218319	human	Tumor only										27	6	0.120294	0	71	11	1.39593	0.12	No	24	54.125	No	cytoskeleton;cytoplasm;	ISOFORM 2 OF TROPOMYOSIN ALPHA-3 CHAIN.
AFG3L2	IPI00001091	human	Tumor only										6	4			4	3	0.535332	0.07	No	60	30.7583	Yes	cell;cytoplasm;mitochondrion;"GO:0005737,IDA"	AFG3-LIKE PROTEIN 2.
GBP1	IPI00556028	human	Tumor only										9	5	0.454032	0.01	6	4	0.785875	0	not annotated	22	43.9145	No		GUANYLATE BINDING PROTEIN 1, INTERFERON-INDUCIBLE, 67KD VARIANT (FRAGMENT).
PTK2	IPI00012885 ; IPI00413961 ; IPI00749256 ; IPI00789953 ; IPI00793270 ; IPI00871963 ; IPI00872391	human	Tumor only										2	2							No	63	52.2556	No	cell;plasmamembrane;cytoplasm;cytosol;cytoskeleton;"GO:0005737,IDA;GO:0005737,IDA;GO:0005829,EXP;GO:0005886,IDA;GO:0005886,IDA" /// cell;plasmamembrane;cytoskeleton; /// cell;plasmamembrane;cytosol;cytoskeleton;cytoplasm;"GO:0005737,IDA;GO:0005737,IDA;GO:	ISOFORM 1 OF FOCAL ADHESION KINASE 1.
FAM49B	IPI00303318 ; IPI00789253	human	Tumor only										6	4	0.200913	0	19	6	0.217591	0	not annotated	23.5	37.4053	Yes		PROTEIN FAM49B.
ENO2	IPI00216171	human	Tumor only										183	9	-0.111031	0.08	288	9	0.184425	0.06	No	30	35.2982	Yes	plasmamembrane;proteincomplex;cytosol;cytoplasm;	GAMMA-ENOLASE.
RPS5	IPI00008433	human	Tumor only										32	6	0.200913	0.19	29	6	0.0740006	0.29	No	15	36.1304	Yes	intracellular;ribosome;cytosol;"GO:0005829,EXP;GO:0005840,IDA;GO:0005829,IDA;GO:0005840,IDA;GO:0005829,IDA"	40S RIBOSOMAL PROTEIN S5.
PSMB3	IPI00028004	human	Tumor only										16	4			4	2			No	9	25.1151	Yes	proteincomplex;cytosol;nucleus;intracellular;cytoplasm;	PROTEASOME SUBUNIT BETA TYPE-3.
GNB1	IPI00026268 ; IPI00642117	human	Tumor only										37	8	0.168123	0.02	42	6	0.184425	0.15	No	18	36.9333	Yes	plasmamembrane;proteincomplex;	GUANINE NUCLEOTIDE-BINDING PROTEIN G(I)/G(S)/G(T) SUBUNIT BETA-1.
EIF3I	IPI00012795	human	Tumor only										7	5	-0.0426443	0	7	3	1.47393	0	No	23	27.4474	Yes	cytoplasm;proteincomplex;cytosol;"GO:0005829,EXP"	EUKARYOTIC TRANSLATION INITIATION FACTOR 3 SUBUNIT I.
CWC15	IPI00009009	human	Tumor only										4	3			3	2			No	16	49.8795	No	cellular_component;nucleus;	PROTEIN CWC15 HOMOLOG.
NUDC	IPI00550746 ; IPI00646767 ; IPI00647418 ; IPI00871312	human	Tumor only										8	5	-0.0565835	0.06	3	1			No	19.25	40.7584	No	nucleus;cytoskeleton;cytoplasm;	NUCLEAR MIGRATION PROTEIN NUDC.
IDH3G	IPI00220150 ; IPI00335068 ; IPI00382584 ; IPI00646235 ; IPI00647820 ; IPI00844297 ; IPI00844496	human	Tumor only										5	3	0.268817	0.1	2	2	0.120294	0	No	16.8571	33.3776	No	nucleolus;nucleus;mitochondrion;"GO:0005634,IDA;GO:0005730,IDA;GO:0005739,EXP" /// cellular_component; /// mitochondrion; /// mitochondrion;cellular_component; /// nucleolus;nucleus;mitochondrion;"GO:0005634,IDA;GO:0005730,IDA;GO:0005739,IDA"	ISOCITRATE DEHYDROGENASE [NAD] SUBUNIT GAMMA, MITOCHONDRIAL PRECURSOR.
PSME3	IPI00030243 ; IPI00219445	human	Tumor only										4	3			3	2	0.120294	0	No	21.5	47.0941	No	cytosol;proteincomplex;intracellular;	ISOFORM 1 OF PROTEASOME ACTIVATOR COMPLEX SUBUNIT 3.
SF3B1	IPI00026089	human	Tumor only										35	18	-1.46989	0	29	20	0.152003	0.02	No	84	38.48	Yes	nucleoplasm;nucleus;	SPLICING FACTOR 3B SUBUNIT 1.
CORO1B	IPI00007058	human	Tumor only										4	3			2	1			No	26	43.5096	No	cytoplasm;cytoskeleton;	CORONIN-1B.
PALLD	IPI00292009 ; IPI00383645 ; IPI00855763 ; IPI00856001 ; IPI00856046 ; IPI00856116 ; IPI00873173	human	Tumor only										22	13	1.12029	0.06	11	3			No	54.8333	49.1777	No	nucleus;cytoskeleton;cytoplasm;"GO:0005634,IDA;GO:0005856,IDA"	ISOFORM 2 OF PALLADIN.
UCHL3	IPI00011250	human	Tumor only										8	5	0.217591	0	13	2			No	14	41.4209	No	intracellular;cytoplasm;	UBIQUITIN CARBOXYL-TERMINAL HYDROLASE ISOZYME L3.
ARF5	IPI00215919 ; IPI00853337	human	Tumor only										27	7	0.621488	0.03	11	4	0.415037	0.03	No	12.5	46.4717	No	plasmamembrane;intracellular;cytoplasm;Golgiapparatus;	ADP-RIBOSYLATION FACTOR 5.
PSMC3	IPI00018398	human	Tumor only										15	10			24	9			No	32	47.8326	No	intracellular;cytoplasm;cytosol;nucleus;proteincomplex;	26S PROTEASE REGULATORY SUBUNIT 6A.
EFNB1	IPI00024307	human	Tumor only										4	2			3	2	-0.286881	0.1	No	23	40.7321	No	cellular_component;plasmamembrane;cell;	EPHRIN-B1 PRECURSOR.
C8orf30A	IPI00009335 ; IPI00184735 ; IPI00382970 ; IPI00741734	human	Tumor only										2	2	-0.163499	0	1	1			No	17.3333	46.8954	No	cellular_component;	BRAIN PROTEIN 16.
RPL19	IPI00025329	human	Tumor only										32	5			16	3			No	15	60.9495	No	intracellular;ribosome;cytosol;"GO:0005829,EXP"	60S RIBOSOMAL PROTEIN L19.
HRB	IPI00304693 ; IPI00607616 ; IPI00736669	human	Tumor only										10	4			1	1			No	20	51.5778	No	proteincomplex;nucleus;nuclearenvelope;organelle;cytoplasm;	ISOFORM 2 OF NUCLEOPORIN-LIKE PROTEIN RIP.
RPS16	IPI00221092 ; IPI00450975 ; IPI00457291	human	Tumor only										21	6	0.434403	0.02	8	3			No	12	28.9644	No	cytosol;intracellular;ribosome;"GO:0005829,EXP;GO:0005840,IDA;GO:0005829,IDA;GO:0005840,IDA;GO:0005829,IDA" /// intracellular;ribosome;	40S RIBOSOMAL PROTEIN S16.
SF3B3	IPI00300371	human	Tumor only										21	8			35	10			No	66	38.6525	Yes	nucleus;	ISOFORM 1 OF SPLICING FACTOR 3B SUBUNIT 3.
HMGB2	IPI00219097	human	Tumor only										53	5	0.321928	0.14	42	6	0.473931	0.06	No	15	57.2684	No	nucleolus;nucleus;chromosome;cytoplasm;nuclearchromosome;"GO:0005694,IDA;GO:0005634,IDA;GO:0005730,IDA;GO:0005737,IDA;GO:0005737,IDA"	HIGH MOBILITY GROUP PROTEIN B2.
PRAF2	IPI00026994 ; IPI00640188	human	Tumor only										4	2			4	1			No	6.5	57.8826	No	cell;endosome;	PRA1 FAMILY PROTEIN 2.
MON2	IPI00465246 ; IPI00797186 ; IPI00797469 ; IPI00855820	human	Tumor only														2	2			not annotated	91.75	51.3431	No		UNCHARACTERIZED PROTEIN MON2.
DERL1	IPI00013271	human	Tumor only										6	3			1	1			No	11	34.7267	Yes	cell;endoplasmicreticulum;"GO:0005783,IMP;GO:0005783,IDA;GO:0005783,IDA"	DERLIN-1.
SNRPD2	IPI00017963 ; IPI00040897 ; IPI00742239	human	Tumor only										15	3	0.395929	0.01	12	2	0.0439433	0	No	10	41.8838	No	nucleoplasm;cytosol;nucleus;"GO:0005654,EXP;GO:0005829,EXP"	SMALL NUCLEAR RIBONUCLEOPROTEIN SM D2.
SMC3	IPI00219420	human	Tumor only										1	1			3	3			Yes	104	45.4737	No	proteinaceousextracellularmatrix;proteincomplex;nucleus;chromosome;cytoskeleton;cytoplasm;nuclearchromosome;"GO:0005856,IDA;GO:0005737,IDA;GO:0005634,IDA"	STRUCTURAL MAINTENANCE OF CHROMOSOMES PROTEIN 3.
VPS35	IPI00018931	human	Tumor only										27	9	0.415037	0.06	26	15	0.184425	0.02	No	50	43.3906	No	endosome;cell;cytoplasm;cytosol;"GO:0005768,IDA;GO:0005829,IDA"	VACUOLAR PROTEIN SORTING-ASSOCIATED PROTEIN 35.
;SUMO2;SUMO4	IPI00140827 ; IPI00299149 ; IPI00434968 ; IPI00455745 ; IPI00745893 ; IPI00790142 ; IPI00827816	human	Tumor only										5	2			2	2			No	6.5	20.6526	Yes	nucleus;	SMT3 SUPPRESSOR OF MIF TWO 3 HOMOLOG 2 ISOFORM B PRECURSOR.
CCT7	IPI00018465 ; IPI00552072	human	Tumor only										40	13	-0.137504	0.07	48	13	-0.0840643	0.07	No	32	32.553	Yes	cytoplasm; /// proteincomplex;cytosol;cytoplasm;"GO:0005737,IDA"	T-COMPLEX PROTEIN 1 SUBUNIT ETA.
PFN2	IPI00107555 ; IPI00795892	human	Tumor only										4	2			6	2			No	8.5	22.3319	Yes	cytoskeleton;cytoplasm;	ISOFORM IIB OF PROFILIN-2.
NUTF2	IPI00009901	human	Tumor only										5	3	0.184425	0.03	3	3	0.415037	0.01	No	8	31.1591	Yes	intracellular;cytoplasm;cytosol;proteincomplex;nuclearenvelope;	NUCLEAR TRANSPORT FACTOR 2.
MPST	IPI00165360 ; IPI00746782 ; IPI00877618	human	Tumor only										8	6	0.340075	0	1	1			No	18.6667	52.6657	No	mitochondrion;cytoplasm;"GO:0005739,IDA" /// mitochondrion;	3-MERCAPTOPYRUVATE SULFURTRANSFERASE.
HSBP1	IPI00026052	human	Tumor only										13	3			3	3			No	7	53.152	No	nucleus;	HEAT SHOCK FACTOR-BINDING PROTEIN 1.
BOP1	IPI00028955 ; IPI00741996	human	Tumor only														2	2			No	43.5	55.2587	No	nucleus;	RIBOSOME BIOGENESIS PROTEIN BOP1.
COPS3	IPI00025721	human	Tumor only										4	2			11	7	0.120294	0.1	No	29	36.2924	Yes	cytoplasm;proteincomplex;nucleus;	COP9 SIGNALOSOME COMPLEX SUBUNIT 3.
C1orf57	IPI00031570 ; IPI00514501	human	Tumor only										3	2			3	2			not annotated	16	46.0753	No		PROBABLE UPF0334 KINASE-LIKE PROTEIN C1ORF57.
FSCN1	IPI00163187 ; IPI00747810	human	Tumor only										163	19	-0.526069	0.16	216	16	-0.163499	0.12	No	36	33.2381	Yes	cell;plasmamembrane;cytoskeleton;cytoplasm;"GO:0005737,IDA;GO:0005886,IDA" /// cell;	FASCIN.
CHD4;CHD5;CHD3	IPI00000846 ; IPI00152535 ; IPI00373870 ; IPI00411592 ; IPI00445286 ; IPI00455210 ; IPI00465222	human	Tumor only										2	1			6	2			No	113.6	49.428	No	nucleus;chromosome; /// nucleus;	ISOFORM 1 OF CHROMODOMAIN-HELICASE-DNA-BINDING PROTEIN 4.
MAGOHB;MAGOH	IPI00059292 ; IPI00219306 ; IPI00513955 ; IPI00745029 ; IPI00789807 ; IPI00797788	human	Tumor only										2	2			2	1			No	11	33.2595	Yes	nucleus;	PROTEIN MAGO NASHI HOMOLOG 2.
FUBP3	IPI00377261	human	Tumor only										21	11	-0.137504	0.07	8	5			No	40	44.8638	No	nucleus;	ISOFORM 1 OF FAR UPSTREAM ELEMENT-BINDING PROTEIN 3.
PSPC1	IPI00103525 ; IPI00395775	human	Tumor only										8	5			3	1			No	31	58.8321	No	nucleus;cytoplasm;	ISOFORM 1 OF PARASPECKLE COMPONENT 1.
IDH2	IPI00011107 ; IPI00385025	human	Tumor only										12	8	0.395929	0.05	19	7	0.0439433	0.04	No	34.5	24.4769	Yes	mitochondrion; /// mitochondrion;"GO:0005739,IDA"	ISOCITRATE DEHYDROGENASE [NADP], MITOCHONDRIAL PRECURSOR.
RPL38	IPI00215790 ; IPI00792410	human	Tumor only										33	2			31	3			No	4	40.5586	No	cytosol;intracellular;ribosome;"GO:0005829,EXP"	60S RIBOSOMAL PROTEIN L38.
	IPI00000129 ; IPI00100810 ; IPI00554701 ; IPI00740951	human	Tumor only										2	2			1	1			No	6.66667	41.8159	No	mitochondrion; /// cell;mitochondrion;	HSPC151.
CRABP2	IPI00216088 ; IPI00643056	human	Tumor only										21	3	0.0892673	0.14	32	2	0.0892673	0.1	No	10.5	31.7812	Yes	nucleus;cytoplasm;	CELLULAR RETINOIC ACID-BINDING PROTEIN 2.
RBM39	IPI00163505 ; IPI00215801 ; IPI00513959 ; IPI00514831 ; IPI00644764 ; IPI00647282 ; IPI00746554 ; IPI00843773	human	Tumor only										11	2							No	18.2857	47.6416	No	nucleoplasm;nucleus;cytoskeleton;"GO:0005856,IDA" /// nucleus;	ISOFORM 1 OF RNA-BINDING PROTEIN 39.
PSMA2	IPI00219622	human	Tumor only										15	6			29	4			No	15	43.7769	No	proteincomplex;cytosol;nucleus;intracellular;cytoplasm;	PROTEASOME SUBUNIT ALPHA TYPE-2.
CCT8	IPI00302925 ; IPI00797206	human	Tumor only										42	12	-0.201634	0.05	57	15	-0.214125	0.06	not annotated	32.5	32.0949	Yes		59 KDA PROTEIN.
CIRBP	IPI00180954 ; IPI00443657 ; IPI00641579 ; IPI00646241	human	Tumor only										12	4			6	2			No	16.3333	41.8083	No	nucleus;	COLD-INDUCIBLE RNA-BINDING PROTEIN.
;RPL32	IPI00005589 ; IPI00395998 ; IPI00794734	human	Tumor only										19	5	0.68966	0.1	29	4	0.184425	0.25	No	9.66667	47.3859	No	intracellular;ribosome; /// cytosol;intracellular;ribosome;"GO:0005829,EXP"	UNCHARACTERIZED PROTEIN ENSP00000275524.
SNRPG	IPI00016572	human	Tumor only										5	2			4	2			No	4	35.0566	Yes	nucleoplasm;cytosol;nucleus;"GO:0005654,EXP;GO:0005829,EXP"	SMALL NUCLEAR RIBONUCLEOPROTEIN G.
TAGLN	IPI00216138 ; IPI00556415	human	Tumor only										7	5							No	15	23.9411	Yes	cytoplasm;	TRANSGELIN.
ITGA3	IPI00215995 ; IPI00290043 ; IPI00556667	human	Tumor only										2	2			11	2	0.0439433	0.12	No	41.6667	39.8697	No	cell;plasmamembrane;proteincomplex;	ISOFORM ALPHA-3A OF INTEGRIN ALPHA-3 PRECURSOR.
OXSR1	IPI00010080	human	Tumor only										2	2							No	33	48.3072	No	cytoplasm;"GO:0005737,IDA"	SERINE/THREONINE-PROTEIN KINASE OSR1.
CTNNB1	IPI00017292	human	Tumor only										85	16	0.943416	0.05	69	17	0.556393	0.11	No	45	41.6397	No	plasmamembrane;cytoplasm;nucleoplasm;cell;cytosol;proteincomplex;nucleus;cytoskeleton;"GO:0005829,EXP;GO:0005829,EXP;GO:0005829,EXP;GO:0005829,EXP;GO:0005829,EXP;GO:0005886,IDA;GO:0005737,IDA;GO:0043234,IDA;GO:0005737,IDA;GO:0043234,IDA"	ISOFORM 1 OF CATENIN BETA-1.
SCYE1	IPI00006252 ; IPI00793201	human	Tumor only										20	9	0.321928	0.04	18	7	0.37707	0	Yes	21	42.5516	No	intracellular;extracellularspace;proteincomplex;"GO:0005622,IDA;GO:0043234,IDA"	MULTISYNTHETASE COMPLEX AUXILIARY COMPONENT P43.
RPS27A;UBB;UBC	IPI00179330 ; IPI00719280 ; IPI00743241 ; IPI00743650 ; IPI00744274 ; IPI00784990 ; IPI00789107 ; IPI00789823 ; IPI00790633 ; IPI00792712 ; IPI00793330 ; IPI00793729 ; IPI00793810 ; IPI00794211 ; IPI00794925 ; IPI00795527 ; IPI00796007 ; IPI00796600 ; IPI	human	Tumor only										62	4	0.120294	0.09	50	5	0.321928	0.04	No	28.0625	31.7482	Yes	intracellular;ribosome; /// nucleoplasm;cytosol;nucleus;cytoplasm;"GO:0005654,EXP;GO:0005654,EXP;GO:0005654,EXP;GO:0005829,EXP;GO:0005829,EXP;GO:0005829,EXP;GO:0005829,EXP;GO:0005829,EXP;GO:0005829,EXP;GO:0005829,EXP;GO:0005829,EXP;GO:0005829,EXP;GO:00058	UBIQUITIN AND RIBOSOMAL PROTEIN S27A PRECURSOR.
RPS25	IPI00012750	human	Tumor only										10	2			8	2			No	9	21.4992	Yes	ribosome;nucleolus;cytosol;"GO:0005730,IDA;GO:0005829,EXP;GO:0005840,IDA;GO:0005840,IDA;GO:0005829,IDA;GO:0005840,IDA;GO:0005829,IDA"	40S RIBOSOMAL PROTEIN S25.
EIF3E	IPI00013068	human	Tumor only										16	6			15	5	-0.189034	0	No	33	46.4566	No	cytoplasm;proteincomplex;cytosol;"GO:0005829,EXP"	EUKARYOTIC TRANSLATION INITIATION FACTOR 3 SUBUNIT E.
KPNA5;KPNA6	IPI00413214 ; IPI00514894 ; IPI00747764 ; IPI00873470	human	Tumor only										3	2	0.0892673	0.02	6	3	0.234465	0.03	No	24.25	52.5998	No	proteincomplex;nucleus;nuclearenvelope;cytoplasm;	KARYOPHERIN ALPHA 5.
FUSIP1	IPI00009071 ; IPI00074587 ; IPI00386662 ; IPI00412643 ; IPI00645384 ; IPI00646643 ; IPI00887543	human	Tumor only										9	3			12	4			No	16	84.0198	No	cytoplasm;nucleoplasm;nucleus;"GO:0005654,IDA" /// nucleoplasm;nucleus;cytoplasm;"GO:0005654,IDA"	ISOFORM 3 OF FUS-INTERACTING SERINE-ARGININE-RICH PROTEIN 1.
PSME1	IPI00479722 ; IPI00748256	human	Tumor only										24	8	0	0	25	10	0.251539	0	No	23	32.5149	Yes	cytosol;nucleus;proteincomplex;intracellular;cytoplasm;"GO:0005634,IDA" /// proteincomplex;intracellular;	PROTEASOME ACTIVATOR COMPLEX SUBUNIT 1.
MYH9	IPI00019502	human	Tumor only										556	64	0.251539	0.08	920	70	0.0892673	0.47	No	158	51.2119	No	cellular_component;cytoplasm;plasmamembrane;cell;proteincomplex;cytosol;nucleus;cytoskeleton;"GO:0005856,IDA;GO:0005856,IDA;GO:0005856,IDA;GO:0005856,IDA;GO:0005623,IDA;GO:0005886,IDA;GO:0005623,IDA;GO:0005634,IDA;GO:0005737,IDA;GO:0005856,IDA;GO:0005737,	MYOSIN-9.
DIP2B	IPI00465045 ; IPI00643040	human	Tumor only										6	3							No	50	48.1398	No	nucleus;	ISOFORM 1 OF DISCO-INTERACTING PROTEIN 2 HOMOLOG B.
MYO18A	IPI00334410 ; IPI00760846 ; IPI00760925 ; IPI00827840 ; IPI00828082	human	Tumor only										2	2	0.251539	0					No	139.4	50.9193	No	proteincomplex;cytoskeleton;cytoplasm;	ISOFORM 2 OF MYOSIN-XVIIIA.
RBM8A	IPI00001757 ; IPI00216659	human	Tumor only										12	3	0.862496	0.01	5	1			No	9	67.2	No	cytoplasm;nucleus; /// nucleus;cytoplasm;	ISOFORM 1 OF RNA-BINDING PROTEIN 8A.
STRAP	IPI00294536 ; IPI00795518	human	Tumor only										5	4			8	4			No	17	37.6289	Yes	nucleus;cytoplasm;	SERINE-THREONINE KINASE RECEPTOR-ASSOCIATED PROTEIN.
TXNDC1	IPI00395887	human	Tumor only										4	3	0.434403	0	8	4	-0.0565835	0.12	No	14	66.7014	No	cell;nucleus;endoplasmicreticulum;"GO:0005623,IDA;GO:0005634,IDA;GO:0005783,IDA"	THIOREDOXIN DOMAIN-CONTAINING PROTEIN 1 PRECURSOR.
ETF1	IPI00429191	human	Tumor only										7	2			4	1			No	31	27.822	Yes	cytoplasm;	EUKARYOTIC PEPTIDE CHAIN RELEASE FACTOR SUBUNIT 1.
;RANBP1	IPI00399212 ; IPI00414127 ; IPI00878075 ; IPI00878440 ; IPI00878611 ; IPI00878950 ; IPI00879666	human	Tumor only										9	2	0.268817	0.06	32	5	0.340075	0.04	No	11.1667	28.1088	Yes	nucleus;microtubuleorganizingcenter;cytoplasm;	SIMILAR TO RANBP1.
RBM12	IPI00550308	human	Tumor only										2	2							No	39	51.6524	No	nucleus;	RNA-BINDING PROTEIN 12.
SLC25A3	IPI00022202 ; IPI00215777 ; IPI00788624 ; IPI00790115 ; IPI00791315 ; IPI00792029 ; IPI00793177	human	Tumor only										2	1	-0.201634	0	11	2	-0.15056	0.02	No	15.6	31.6465	No	cell;plasmamembrane;mitochondrion; /// cell;mitochondrion; /// mitochondrion;	ISOFORM A OF PHOSPHATE CARRIER PROTEIN, MITOCHONDRIAL PRECURSOR.
ITGB5	IPI00029741 ; IPI00790921 ; IPI00794350	human	Tumor only										4	4	1.21759	0	2	2	-2.34483	0	No	24.6667	34.087	Yes	cell;plasmamembrane;proteincomplex;	INTEGRIN BETA-5 PRECURSOR.
PDAP1	IPI00013297	human	Tumor only										9	3			9	3			not annotated	15	70.6492	No		28 KDA HEAT- AND ACID-STABLE PHOSPHOPROTEIN.
RAP1B	IPI00015148	human	Tumor only										12	2	0.268817	0	28	6	0.0892673	0	No	14	44.262	No	intracellular;plasmamembrane;cytoplasm;	RAS-RELATED PROTEIN RAP-1B PRECURSOR.
CHMP5	IPI00100796	human	Tumor only										10	2	0.434403	0.03	8	2	0.415037	0.02	No	9	45.9333	No	nucleus;cytoplasm;	CHARGED MULTIVESICULAR BODY PROTEIN 5.
SMARCE1	IPI00017669 ; IPI00470489 ; IPI00793699 ; IPI00794957 ; IPI00796698 ; IPI00798328	human	Tumor only										2	2							No	18.3333	61.5931	No	nucleoplasm;proteincomplex;nucleus;nuclearchromosome;"GO:0005654,IPI;GO:0043234,IPI"	ISOFORM 1 OF SWI/SNF-RELATED MATRIX-ASSOCIATED ACTIN-DEPENDENT REGULATOR OF CHROMATIN SUBFAMILY E MEMBER 1.
ACTR3	IPI00028091	human	Tumor only										76	14	0.304006	0.04	83	13	0.104697	0.05	No	24	37.9428	Yes	cell;proteincomplex;cytoskeleton;cytoplasm;	ACTIN-RELATED PROTEIN 3.
RNF170	IPI00166853 ; IPI00217601 ; IPI00742872 ; IPI00829735 ; IPI00829763	human	Tumor only														2	2			No	10.6	50.5942	No	cell;	ISOFORM 3 OF RING FINGER PROTEIN 170.
RPLP1	IPI00008527	human	Tumor only										22	3	0.0144996	0.02	19	3	0.0892673	0	No	4	55.9272	No	intracellular;ribosome;cytoplasm;cytosol;"GO:0005737,IDA;GO:0005829,EXP"	60S ACIDIC RIBOSOMAL PROTEIN P1.
GRWD1	IPI00027831 ; IPI00847896	human	Tumor only										4	3	-0.189034	0	2	2			No	23	53.1254	No	nucleus;	GLUTAMATE-RICH WD REPEAT-CONTAINING PROTEIN 1.
HNRNPAB	IPI00106509 ; IPI00329355 ; IPI00334587 ; IPI00742926	human	Tumor only										25	6			18	5			No	18.5	38.8922	No	nucleus;cytoplasm;	ISOFORM 4 OF HETEROGENEOUS NUCLEAR RIBONUCLEOPROTEIN A/B.
NARG1	IPI00032158 ; IPI00386189	human	Tumor only										6	3	-0.0426443	0.12	11	8	1.4344	0	No	73	46.4193	No	nucleoplasm;proteincomplex;nucleus;cytoplasm;"GO:0005634,IDA;GO:0005634,IDA;GO:0005654,IDA;GO:0043234,IDA;GO:0005737,IDA;GO:0005737,IDA"	ISOFORM 2 OF NMDA RECEPTOR-REGULATED PROTEIN 1.
HMG20A	IPI00018924	human	Tumor only										2	2							No	26	55.4983	No	nucleus;	ISOFORM 1 OF HIGH MOBILITY GROUP PROTEIN 20A.
RPS3A	IPI00419880 ; IPI00472119 ; IPI00736161 ; IPI00783817	human	Tumor only										49	8	0.104697	0.04	61	8	-0.0285692	0.12	No	21.3333	24.4472	Yes	nucleolus;cytosol;nucleus;intracellular;ribosome;cytoplasm;"GO:0005730,IDA;GO:0005737,IDA;GO:0005829,EXP;GO:0005840,IDA;GO:0005829,IDA;GO:0005840,IDA;GO:0005829,IDA" /// intracellular;ribosome;	40S RIBOSOMAL PROTEIN S3A.
EPHX1	IPI00009896	human	Tumor only														9	6	-0.31034	0	No	25	37.5822	Yes	cell;endoplasmicreticulum;	EPOXIDE HYDROLASE 1.
PTMS	IPI00550020 ; IPI00783736	human	Tumor only										3	2							No	4	93.2093	No	nucleus;	PARATHYMOSIN.
VDAC2	IPI00024145 ; IPI00216024	human	Tumor only										42	6	-0.238787	0.03	64	7	0.0291463	0.06	No	19	17.0629	Yes	cell;mitochondrion;	VOLTAGE-DEPENDENT ANION-SELECTIVE CHANNEL PROTEIN 2.
VCP	IPI00022774 ; IPI00871453	human	Tumor only										164	30	0.120294	0.09	174	27	0.0740006	0.07	No	52	39.6498	Yes	cell;cytoplasm;cytosol;endoplasmicreticulum;nucleus;"GO:0005634,IDA;GO:0005783,IDA;GO:0005829,IDA;GO:0005829,IDA"	TRANSITIONAL ENDOPLASMIC RETICULUM ATPASE.
HNRNPH1	IPI00013881 ; IPI00479191	human	Tumor only										90	11	0.415037	0.03	78	10	0.217591	0.13	No	27.5	31.6581	Yes	nucleus;cytoskeleton;"GO:0005856,IDA"	HETEROGENEOUS NUCLEAR RIBONUCLEOPROTEIN H.
TSN	IPI00018768	human	Tumor only										6	2			6	3	1.68966	0.01	No	17	47.7544	No	cytoplasm;nucleus;	TRANSLIN.
POSTN	IPI00007960 ; IPI00218585 ; IPI00410241 ; IPI00641231 ; IPI00873848	human	Tumor only										33	6	1.35845	0.09	23	5	0.395929	0.04	Yes	52.5	35.0092	Yes	extracellularregion;proteinaceousextracellularmatrix; /// proteinaceousextracellularmatrix;extracellularregion;	ISOFORM 1 OF PERIOSTIN PRECURSOR.
CD151	IPI00298851	human	Tumor only										5	3	-0.584963	0	4	2	0.0740006	0	No	12	33.5123	Yes	plasmamembrane;cell;	CD151 ANTIGEN.
ARPC4;TTLL3;ARPC4;TTLL3	IPI00554811 ; IPI00607772 ; IPI00790262	human	Tumor only										15	6	0.415037	0	5	2			No	20.6667	32.9513	No	cell;proteincomplex;cytoskeleton;cytoplasm;	ACTIN-RELATED PROTEIN 2/3 COMPLEX SUBUNIT 4.
MACF1	IPI00165470 ; IPI00256859 ; IPI00256861 ; IPI00329084 ; IPI00550385 ; IPI00640975 ; IPI00872730	human	Tumor only										38	22	-0.516015	0	57	34	-0.201634	0	No	139	43.6692	No	cytoskeleton;cytoplasm;"GO:0005737,IDA"	CDNA FLJ13223 FIS, CLONE OVARC1000001, HIGHLY SIMILAR TO HOMO SAPIENS ACTIN BINDING PROTEIN ABP620.
CPSF6	IPI00012998 ; IPI00030654 ; IPI00647126 ; IPI00797184	human	Tumor only										5	3	0.535332	0	7	2			No	19.25	59.7172	No	nucleoplasm;proteincomplex;nucleus;"GO:0005654,IDA;GO:0043234,IDA;GO:0005654,IDA"	ISOFORM 1 OF CLEAVAGE AND POLYADENYLATION SPECIFICITY FACTOR SUBUNIT 6.
NDUFV1	IPI00028520 ; IPI00221298	human	Tumor only										8	6	0.0291463	0.14	8	5	-0.137504	0.13	No	35.5	39.7323	No	cell;proteincomplex;mitochondrion;"GO:0043234,IMP;GO:0005739,IMP"	ISOFORM 1 OF NADH DEHYDROGENASE [UBIQUINONE] FLAVOPROTEIN 1, MITOCHONDRIAL PRECURSOR.
PA2G4	IPI00299000 ; IPI00794875	human	Tumor only										21	9	-0.0840643	0.17	27	7	-0.565597	0.39	No	27.5	30.0132	Yes	nucleus;intracellular;cytoplasm;"GO:0005634,IDA"	PROLIFERATION-ASSOCIATED PROTEIN 2G4.
PDCD6IP	IPI00246058 ; IPI00871576	human	Tumor only										42	12	0.473931	0.06	27	15	0.286304	0.03	No	64	51.7893	No	cytosol;cytoplasm;cytoplasmicmembrane-boundedvesicle;	PDCD6IP PROTEIN.
MBNL1;MBNL2	IPI00021692 ; IPI00183078 ; IPI00384261 ; IPI00410608 ; IPI00744083 ; IPI00746170 ; IPI00871699	human	Tumor only										9	5	0.168123	0.07	2	1			No	17	33.3727	No	cytoplasm;nucleus;"GO:0005634,IDA;GO:0005737,IDA" /// nucleus;cytoplasm;	ISOFORM EXP42 OF MUSCLEBLIND-LIKE PROTEIN 1.
SF3A1	IPI00017451 ; IPI00470590 ; IPI00878312	human	Tumor only										14	8			8	4			No	35	64.3189	No	nucleus;"GO:0005634,IDA"	SPLICING FACTOR 3 SUBUNIT 1.
CLTC	IPI00024067 ; IPI00455383	human	Tumor only										241	47	0.234465	0.16	332	47	-0.0143553	0.17	No	111.5	41.2243	No	organelle;cytoplasm;plasmamembrane;proteincomplex;cytoplasmicmembrane-boundedvesicle;mitochondrion;Golgiapparatus;"GO:0005886,EXP;GO:0005886,EXP" /// plasmamembrane;proteincomplex;mitochondrion;organelle;cytoplasm;cytoplasmicmembrane-boundedvesicle;Golgia	ISOFORM 1 OF CLATHRIN HEAVY CHAIN 1.
UBTF	IPI00014533 ; IPI00220833 ; IPI00384556	human	Tumor only										8	4	1.12029	0.02	3	2			No	57	61.4717	No	nucleolus;nucleoplasm;nucleus;"GO:0005654,EXP;GO:0005654,EXP;GO:0005654,EXP;GO:0005654,EXP;GO:0005654,EXP"	ISOFORM UBF1 OF NUCLEOLAR TRANSCRIPTION FACTOR 1.
HSPA8	IPI00003865	human	Tumor only										322	27	-0.176323	0.24	322	25	-0.226509	0.17	No	41	36.8893	Yes	intracellular;cell;cytoplasm;cytoplasmicmembrane-boundedvesicle;"GO:0005623,IDA"	ISOFORM 1 OF HEAT SHOCK COGNATE 71 KDA PROTEIN.
G3BP2	IPI00009057 ; IPI00179890	human	Tumor only										13	6			6	2			No	32.5	56.5575	No	intracellular;cytoplasm;	ISOFORM A OF RAS GTPASE-ACTIVATING PROTEIN-BINDING PROTEIN 2.
UGCGL1	IPI00024466 ; IPI00619903	human	Tumor only										3	3			21	12	0.200913	0.02	No	92.5	37.4325	Yes	intracellular;organelle;cytoplasm;endoplasmicreticulum;"GO:0005783,IDA"	UDP-GLUCOSE CERAMIDE GLUCOSYLTRANSFERASE-LIKE 1 ISOFORM 1.
MAPK1	IPI00003479 ; IPI00874012	human	Tumor only										7	4	-0.526069	0	11	6	-0.454176	0.1	No	22	35.944	Yes	cytoplasm;nucleoplasm;cytosol;nucleus;cytoskeleton;"GO:0005654,EXP;GO:0005654,EXP;GO:0005654,EXP;GO:0005654,EXP;GO:0005829,EXP;GO:0005829,EXP;GO:0005856,IDA"	MITOGEN-ACTIVATED PROTEIN KINASE 1.
HIST2H3A;HIST2H3C;HIST2H3D;HIST3H3	IPI00171611 ; IPI00216402	human	Tumor only										37	1	0.514573	0.03	49	2	-0.0565835	0.07	No	9	47.1926	No	nucleus;chromosome;	HISTONE H3.2.
RAB5B	IPI00017344	human	Tumor only										3	2			3	3			No	15	39.234	Yes	intracellular;endosome;plasmamembrane;cell;cytoplasmicmembrane-boundedvesicle;"GO:0005622,IDA;GO:0005768,IDA"	RAS-RELATED PROTEIN RAB-5B.
ZRANB2	IPI00029400 ; IPI00219866 ; IPI00845348	human	Tumor only										1	1	0.915936	0	3	2	0.514573	0	No	25	80.2714	No	nucleus;intracellular;	ISOFORM 1 OF ZINC FINGER RAN-BINDING DOMAIN-CONTAINING PROTEIN 2.
HNRNPR	IPI00012074	human	Tumor only										23	12	0.0740006	0.02	19	8	0.168123	0	No	45	38.6747	Yes	nucleus;	HETEROGENEOUS NUCLEAR RIBONUCLEOPROTEIN R.
RPS6KA1	IPI00017305 ; IPI00477982 ; IPI00513863 ; IPI00641051	human	Tumor only										11	10	0.577767	0	2	2	0.415037	0	No	39.5	41.5329	No	cytoplasm;nucleoplasm;nucleus;cytoskeleton;"GO:0005634,IDA;GO:0005654,EXP;GO:0005654,EXP;GO:0005737,IDA" /// nucleus;cytoplasm;"GO:0005634,IDA;GO:0005737,IDA" /// ribosome;	RIBOSOMAL PROTEIN S6 KINASE ALPHA-1.
YWHAZ	IPI00021263 ; IPI00879359	human	Tumor only										148	10	-0.0143553	0.11	331	11	0.251539	0.04	No	22	43.3057	No	cytoplasm;cytoplasmicmembrane-boundedvesicle;	14-3-3 PROTEIN ZETA/DELTA.
PPM1G	IPI00006167	human	Tumor only										3	2			1	1			No	26	53.5377	No	cell;cytoplasm;proteincomplex;nucleus;	PROTEIN PHOSPHATASE 1G.
HP	IPI00431645	human	Tumor only														5	2			Yes	22	38.0285	Yes	extracellularregion;	HP PROTEIN.
EEF1G	IPI00000875 ; IPI00747497	human	Tumor only										77	13	0	0.21	116	11	0.152003	0.08	No	28	38.6995	Yes	intracellular;cytoplasm;proteincomplex;cytosol;"GO:0005829,EXP"	ELONGATION FACTOR 1-GAMMA.
C22orf28	IPI00550689 ; IPI00893551	human	Tumor only										30	12	0.217591	0.05	21	8			not annotated	19	39.7248	No		UPF0027 PROTEIN C22ORF28.
RPS23	IPI00218606 ; IPI00739952 ; IPI00887638 ; IPI00888094	human	Tumor only										18	5	0.0439433	0	22	5	0.0588937	0.03	No	10	12.9008	Yes	cytosol;intracellular;ribosome;"GO:0005829,EXP;GO:0005840,IDA;GO:0005829,IDA;GO:0005840,IDA;GO:0005829,IDA"	40S RIBOSOMAL PROTEIN S23.
ARPC1B	IPI00005160 ; IPI00737530	human	Tumor only										5	2	0.785875	0.04	7	2			No	23	39.4067	No	cytoplasm;proteincomplex;cytoskeleton;	ACTIN-RELATED PROTEIN 2/3 COMPLEX SUBUNIT 1B.
CBX5	IPI00024662	human	Tumor only										20	2	0.473931	0.09					No	14	48.0707	No	nuclearchromosome;nucleus;proteincomplex;nuclearenvelope;chromosome;	CHROMOBOX PROTEIN HOMOLOG 5.
GIPC1	IPI00024705 ; IPI00401971	human	Tumor only										6	5							No	19	35.5932	Yes	organelle;cytoplasm;cell;cytosol;cytoplasmicmembrane-boundedvesicle;"GO:0005623,IDA;GO:0005623,IDA;GO:0005737,IDA;GO:0016023,IDA" /// cell;cytosol;organelle;cytoplasm;cytoplasmicmembrane-boundedvesicle;	PDZ DOMAIN-CONTAINING PROTEIN GIPC1.
PUF60	IPI00069750 ; IPI00100716 ; IPI00788826 ; IPI00797595 ; IPI00855912 ; IPI00856076	human	Tumor only										8	3			10	2			No	30	50.9694	No	proteincomplex;nucleus;intracellular;"GO:0005634,IDA;GO:0043234,IDA"	ISOFORM 1 OF POLY.
RAD23A	IPI00008219	human	Tumor only										3	2			1	1			No	17	55.6289	No	nucleus;	UV EXCISION REPAIR PROTEIN RAD23 HOMOLOG A.
	IPI00007063	human	Tumor only										7	2			2	2			No	13	56.2448	No	nucleus;"GO:0005634,IDA"	HEPATOMA-DERIVED GROWTH FACTOR-RELATED PROTEIN 3.
CASP7	IPI00216675 ; IPI00221307 ; IPI00514222 ; IPI00647486	human	Tumor only										2	2							No	19.5	27.3527	Yes	cytosol;mitochondrion;cytoplasm;endoplasmicreticulum;"GO:0005829,EXP;GO:0005829,EXP;GO:0005829,EXP"	ISOFORM ALPHA' OF CASPASE-7 PRECURSOR.
CBX3	IPI00297579	human	Tumor only										38	4	0.535332	0.08	24	5	0.304006	0.08	No	14	44.2224	No	nucleus;nuclearenvelope;cytoskeleton;chromosome;nuclearchromosome;"GO:0005694,IDA;GO:0000228,IDA;GO:0005856,IDA"	CHROMOBOX PROTEIN HOMOLOG 3.
SNRPE;SNRPEL1	IPI00029266 ; IPI00068430 ; IPI00071399 ; IPI00647942	human	Tumor only										2	1	0.473931	0	4	2	0.136062	0	No	4	52.2587	No	nucleoplasm;cytosol;nucleus;"GO:0005654,EXP;GO:0005829,EXP"	SMALL NUCLEAR RIBONUCLEOPROTEIN E.
RPL8	IPI00012772 ; IPI00797230	human	Tumor only										58	9	0.666576	0.11	49	6	0.0588937	0.09	No	18	26.8891	Yes	intracellular;ribosome;cytoplasm;cytosol;"GO:0005829,EXP"	60S RIBOSOMAL PROTEIN L8.
YWHAE	IPI00000816	human	Tumor only										92	7	-0.201634	0.08	74	9	0.104697	0.02	No	21	41.3906	No	cytoplasm;cytoplasmicmembrane-boundedvesicle;mitochondrion;	14-3-3 PROTEIN EPSILON.
PEBP1	IPI00219446 ; IPI00795288	human	Tumor only										46	9	0.415037	0.01	43	8	0.434403	0.12	No	13	23.5182	Yes	cytoplasm;	PHOSPHATIDYLETHANOLAMINE-BINDING PROTEIN 1.
UBE2M	IPI00022597	human	Tumor only										4	3	0.304006	0.01					No	12	40.4814	No	cellular_component;	NEDD8-CONJUGATING ENZYME UBC12.
RPS6	IPI00021840	human	Tumor only										24	6	0.713119	0.09	41	4	-0.0565835	0.08	No	23	51.7779	No	intracellular;ribosome;cytosol;nucleus;"GO:0005634,IDA;GO:0005829,EXP;GO:0005829,EXP;GO:0005840,IDA;GO:0005829,IDA"	40S RIBOSOMAL PROTEIN S6.
UGP2	IPI00329331 ; IPI00395676 ; IPI00873223	human	Tumor only										7	3			9	6			No	35.5	32.2347	Yes	cytosol;cytoplasm;"GO:0005829,EXP"	ISOFORM 1 OF UTP--GLUCOSE-1-PHOSPHATE URIDYLYLTRANSFERASE.
PABPC4	IPI00012726 ; IPI00555747 ; IPI00642904 ; IPI00642944	human	Tumor only										46	8	0.136062	0.22					No	50	40.6063	No	cytoplasm;"GO:0005737,IDA"	ISOFORM 1 OF POLYADENYLATE-BINDING PROTEIN 4.
SMARCD2	IPI00177890 ; IPI00242273 ; IPI00514042 ; IPI00848321 ; IPI00853043	human	Tumor only										2	2							No	32	53.037	No	nucleus; /// nucleoplasm;nucleus;	54 KDA PROTEIN.
HAT1	IPI00024719 ; IPI00651621	human	Tumor only										9	6	-0.356144	0	2	2			No	20	39.2556	No	cytoplasm;nucleus;	HISTONE ACETYLTRANSFERASE TYPE B CATALYTIC SUBUNIT.
RPL35A	IPI00029731	human	Tumor only										7	2			5	3			No	11	35.0809	Yes	cytosol;intracellular;ribosome;"GO:0005829,EXP"	60S RIBOSOMAL PROTEIN L35A.
MUTED;TXNDC5	IPI00171438 ; IPI00395646	human	Tumor only										3	3	3.8365	0	19	4	-0.0703893	0.04	No	29	32.7565	Yes	intracellular;organelle;endoplasmicreticulum; /// intracellular;organelle;	THIOREDOXIN DOMAIN-CONTAINING PROTEIN 5 PRECURSOR.
RBBP4	IPI00877934	human	Tumor only										14	10	-1.97085	0	12	5	0.0291463	0	not annotated	16	39.5472	Yes		48 KDA PROTEIN.
EIF2S3	IPI00297982	human	Tumor only										14	7	-0.226509	0	29	7	-0.389567	0.2	No	36	36.7036	Yes	cytosol;"GO:0005829,EXP;GO:0005829,EXP"	EUKARYOTIC TRANSLATION INITIATION FACTOR 2 SUBUNIT 3.
LUC7L2	IPI00006932 ; IPI00216804 ; IPI00893216	human	Tumor only										2	2	0.304006	0	4	3	0.136062	0	not annotated	19.6667	40.831	No		ISOFORM 1 OF PUTATIVE RNA-BINDING PROTEIN LUC7-LIKE 2.
MTX2	IPI00025717 ; IPI00477773	human	Tumor only										1	1	-0.226509	0	3	3	-0.516015	0	No	13	42.3225	No	cell;mitochondrion; /// mitochondrion;	METAXIN-2.
	IPI00043598	human	Tumor only														2	2			No	30	65.8358	No	cell;endoplasmicreticulum;	CDNA FLJ31051 FIS, CLONE HSYRA2000605, WEAKLY SIMILAR TO MYOSIN HEAVY CHAIN, CLONE 203.
SUCLA2	IPI00217232 ; IPI00464979 ; IPI00514217	human	Tumor only														2	2	0.836501	0	No	33	39.4209	No	mitochondrion;"GO:0005739,IDA"	ISOFORM 2 OF SUCCINYL-COA LIGASE [ADP-FORMING] BETA-CHAIN, MITOCHONDRIAL PRECURSOR.
SAMHD1	IPI00294739	human	Tumor only										2	2							No	45	35.0419	Yes	nucleus;intracellular;"GO:0005634,IDA"	SAM DOMAIN AND HD DOMAIN-CONTAINING PROTEIN 1.
YY1;ZFP42;YY2	IPI00014513 ; IPI00292080 ; IPI00419912 ; IPI00878557	human	Tumor only										4	2	0.415037	0					No	22.75	42.4505	No	intracellular;plasmamembrane;cytoplasm;nucleoplasm;proteincomplex;nucleus;"GO:0005737,IDA;GO:0005886,IDA" /// nucleus;intracellular;cytoplasm;"GO:0005737,IDA;GO:0005737,IDA" /// nucleus;intracellular;	TRANSCRIPTIONAL REPRESSOR PROTEIN YY1.
SERPINB5	IPI00644196	human	Tumor only										70	5	0.0588937	0.04	91	6	0.286304	0.04	not annotated	20	38.8524	Yes		SERPINB5 PROTEIN.
KIAA0152	IPI00029046 ; IPI00798088	human	Tumor only										1	1			3	3			No	15	36.9966	Yes	cell;	UNCHARACTERIZED PROTEIN KIAA0152 PRECURSOR.
RAB10	IPI00016513	human	Tumor only										8	4			10	4			No	18	29.3755	Yes	intracellular;plasmamembrane;Golgiapparatus;	RAS-RELATED PROTEIN RAB-10.
SBDS	IPI00427330	human	Tumor only										3	2	0.888969	0	3	2			No	22	38.0872	Yes	nucleolus;nucleus;cytoskeleton;cytoplasm;"GO:0005856,IDA;GO:0005634,IDA;GO:0005634,IDA;GO:0005730,IDA;GO:0005730,IDA;GO:0005737,IDA;GO:0005737,IDA"	RIBOSOME MATURATION PROTEIN SBDS.
KARS	IPI00014238 ; IPI00307092 ; IPI00445108	human	Tumor only										15	7	-0.176323	0	7	5	0.0144996	0	No	31	43.9335	No	cytoplasm;cell; /// mitochondrion;cytoplasm;"GO:0005739,IDA" /// cytoplasm;	LYSYL-TRNA SYNTHETASE.
MCM7	IPI00299904 ; IPI00376143	human	Tumor only										2	1			13	4			No	46.5	46.6178	No	nucleoplasm;proteincomplex;nucleus;chromosome;cytoplasm;nuclearchromosome;"GO:0005634,IDA;GO:0005654,EXP;GO:0005654,EXP;GO:0005654,EXP;GO:0005654,EXP;GO:0005654,EXP;GO:0005654,EXP;GO:0005654,EXP;GO:0005737,IDA;GO:0005737,IDA;GO:0005654,IMP;GO:0000228,IMP;	ISOFORM 1 OF DNA REPLICATION LICENSING FACTOR MCM7.
RPL22	IPI00219153 ; IPI00878392 ; IPI00879364	human	Tumor only										17	1	0.340075	0.05	27	4	0.217591	0.03	No	5.66667	25.2062	No	cytosol;intracellular;ribosome;"GO:0005829,EXP"	60S RIBOSOMAL PROTEIN L22.
SFRS10	IPI00301503 ; IPI00472633 ; IPI00555647 ; IPI00872079	human	Tumor only										19	3	0.785875	0.01	7	2			No	21	95.9591	No	nucleus;"GO:0005634,IDA"	ISOFORM 1 OF SPLICING FACTOR, ARGININE/SERINE-RICH 10.
WASF4;WASF3;WASF2	IPI00002647 ; IPI00299003 ; IPI00384347 ; IPI00472164	human	Tumor only										8	4	-0.650765	0	8	4			No	24.25	72.7459	No	cell;cytoplasm;cytoskeleton; /// cytoskeleton;cytoplasm; /// cell;cytoskeleton;intracellular;cytoplasm;"GO:0005622,IDA;GO:0005623,IDA"	WISKOTT-ALDRICH SYNDROME PROTEIN FAMILY MEMBER 4.
CCDC25	IPI00396174 ; IPI00477220 ; IPI00796594 ; IPI00797903	human	Tumor only										3	2			3	2			not annotated	13	35.1097	Yes		COILED-COIL DOMAIN-CONTAINING PROTEIN 25.
PSMA5	IPI00291922	human	Tumor only										18	6	0.0439433	0.01	23	5	-0.0143553	0.03	No	15	50.522	No	proteincomplex;cytosol;nucleus;intracellular;cytoplasm;	PROTEASOME SUBUNIT ALPHA TYPE-5.
NMT1	IPI00218830 ; IPI00329692	human	Tumor only										5	5			9	5			No	28	48.5894	No	cytosol;cellular_component;cytoplasm;"GO:0005829,EXP"	ISOFORM SHORT OF GLYCYLPEPTIDE N-TETRADECANOYLTRANSFERASE 1.
SH3KBP1	IPI00294962 ; IPI00477285 ; IPI00477897 ; IPI00643458 ; IPI00645893 ; IPI00873875	human	Tumor only										5	2							No	40.8	47.2919	No	cell;plasmamembrane;cytosol;nucleus;cytoskeleton;cellular_component;organelle;cytoplasm;cytoplasmicmembrane-boundedvesicle;"GO:0005634,IDA;GO:0005829,EXP;GO:0005829,EXP;GO:0005829,EXP;GO:0005829,EXP;GO:0005886,EXP" /// cytoplasm;"GO:0005737,IDA"	ISOFORM 1 OF SH3 DOMAIN-CONTAINING KINASE-BINDING PROTEIN 1.
RPS11	IPI00025091	human	Tumor only										31	4	0.234465	0.09	44	7	0.268817	0.22	No	13	41.8462	No	intracellular;ribosome;cytosol;"GO:0005829,EXP;GO:0005840,IDA;GO:0005829,IDA;GO:0005840,IDA;GO:0005829,IDA"	40S RIBOSOMAL PROTEIN S11.
VPS26A	IPI00411426 ; IPI00656002	human	Tumor only										7	2			16	4			No	22.5	39.8219	No	cell;proteincomplex;cytosol;endosome;cytoplasm;"GO:0005829,IDA" /// cell;proteincomplex;	VACUOLAR PROTEIN SORTING-ASSOCIATED PROTEIN 26A.
YWHAG	IPI00220642	human	Tumor only										66	11	0.304006	0.03	45	8	0.217591	0.02	No	21	41.9964	No	cytoplasm;	14-3-3 PROTEIN GAMMA.
DYNLT1	IPI00019495 ; IPI00479503	human	Tumor only										3	1			6	2			No	7	22.8206	Yes	proteincomplex;cytoskeleton;	DYNEIN LIGHT CHAIN TCTEX-TYPE 1.
FAU	IPI00019770 ; IPI00397098	human	Tumor only										6	2			1	1			No	6.5	24.6887	Yes	intracellular;cellular_component;ribosome; /// cytosol;intracellular;ribosome;cytoplasm;"GO:0005829,EXP;GO:0005840,IDA;GO:0005829,IDA"	UBIQUITIN-LIKE PROTEIN FUBI AND RIBOSOMAL PROTEIN S30 PRECURSOR.
EIF3EIP	IPI00465233 ; IPI00745266 ; IPI00787469 ; IPI00879876	human	Tumor only										20	8	-0.0840643	0	18	9			No	32.75	50.089	No	nucleoplasm;nucleolus; /// nucleoplasm;nucleolus;nucleus;"GO:0005634,IDA" /// nucleolus;nucleus;"GO:0005634,IDA;GO:0005730,IDA"	EUKARYOTIC TRANSLATION INITIATION FACTOR 3, SUBUNIT E INTERACTING PROTEIN.
COPS4	IPI00171844	human	Tumor only										10	5	0.577767	0.05	9	5			No	35	37.5872	Yes	proteincomplex;nucleus;cytoplasm;	COP9 SIGNALOSOME COMPLEX SUBUNIT 4.
MSN	IPI00219365 ; IPI00872814	human	Tumor only										155	18	0.217591	0.08	173	15	0.358454	0.04	No	46	51.7665	No	plasmamembrane;cell;cytoskeleton;cytoplasm;"GO:0005623,IDA;GO:0005623,IDA" /// cell;cytoskeleton;cytoplasm;	MOESIN.
GMPS	IPI00029079	human	Tumor only										19	8			15	6			No	48	41.1393	No	cytoplasm;	GMP SYNTHASE.
H3F3A;H3F3B	IPI00219038	human	Tumor only										12	1	0.577767	0.04	31	2	0.0740006	0.03	No	9	44.2449	No	nucleus;chromosome;nuclearchromosome;	HISTONE H3.3.
HERC4	IPI00333067 ; IPI00604497 ; IPI00827523 ; IPI00827948	human	Tumor only														2	2			No	58.3333	35.4273	Yes	intracellular;cytoplasm;	ISOFORM 1 OF PROBABLE E3 UBIQUITIN-PROTEIN LIGASE HERC4.
LMNB2	IPI00009771 ; IPI00879819	human	Tumor only										18	8			22	7	0.136062	0	No	49.5	52.0067	No	cell;nucleus;nuclearenvelope;cytoskeleton;	LAMIN-B2.
PLA2G4B	IPI00382394 ; IPI00419782 ; IPI00874283 ; IPI00893322 ; IPI00893472 ; IPI00894041	human	Tumor only										5	3			1	1			not annotated	10	44.0576	No		ISOFORM 5 OF CYTOSOLIC PHOSPHOLIPASE A2 BETA.
GTF2E2	IPI00019981 ; IPI00793378	human	Tumor only										3	2							No	20.5	40.6114	No	nucleoplasm;proteincomplex;nucleus;"GO:0005654,EXP;GO:0005654,EXP;GO:0005654,EXP"	TRANSCRIPTION INITIATION FACTOR IIE SUBUNIT BETA.
PSMD1	IPI00299608 ; IPI00456695	human	Tumor only										26	7	-0.15056	0.12	49	18	-0.0976108	0.09	No	54.5	42.8484	No	cytosol;proteincomplex;intracellular;	ISOFORM 1 OF 26S PROTEASOME NON-ATPASE REGULATORY SUBUNIT 1.
SMAP1	IPI00102096 ; IPI00185325 ; IPI00514489 ; IPI00604487	human	Tumor only										2	2			1	1			No	13.3333	53.2766	No	plasmamembrane;	ISOFORM 1 OF STROMAL MEMBRANE-ASSOCIATED PROTEIN 1.
MAPRE1	IPI00017596	human	Tumor only										15	5	0.136062	0.13	18	6	-0.0703893	0	No	19	35.156	Yes	cytoplasm;cytoskeleton;Golgiapparatus;"GO:0005856,IDA;GO:0005856,IDA;GO:0005856,IDA;GO:0005737,IDA"	MICROTUBULE-ASSOCIATED PROTEIN RP/EB FAMILY MEMBER 1.
TRIM29	IPI00073096 ; IPI00232492	human	Tumor only										28	8	-0.176323	0.4	41	12	0.494109	0.02	No	45.5	44.1791	No	intracellular;cytoplasm;	ISOFORM ALPHA OF TRIPARTITE MOTIF-CONTAINING PROTEIN 29.
UBE2N	IPI00003949 ; IPI00796342 ; IPI00874051	human	Tumor only										6	4	0.184425	0	4	2			No	9.33333	41.3215	No	intracellular;cytoplasm;proteincomplex;nucleus;"GO:0005634,IDA;GO:0005622,IDA;GO:0043234,IDA"	UBIQUITIN-CONJUGATING ENZYME E2 N.
DCPS	IPI00335385	human	Tumor only										1	1	0.321928	0	8	2			No	22	54.7229	No	nucleus;cytoplasm;	SCAVENGER MRNA-DECAPPING ENZYME DCPS.
TOLLIP	IPI00100154 ; IPI00167490 ; IPI00654582	human	Tumor only										4	2			7	3			No	18	54.7157	No	plasmamembrane;proteincomplex;cytoplasm;	TOLL-INTERACTING PROTEIN.
ANP32B	IPI00007423 ; IPI00647001 ; IPI00759824 ; IPI00760940	human	Tumor only										15	5	0.0740006	0.16	9	3	0.434403	0.19	No	12.5	46.6185	No	nucleus;	ISOFORM 1 OF ACIDIC LEUCINE-RICH NUCLEAR PHOSPHOPROTEIN 32 FAMILY MEMBER B.
LAMC1	IPI00298281	human	Tumor only										28	11	2	0.03	11	3			Yes	89	42.9168	No	proteinaceousextracellularmatrix;plasmamembrane;proteincomplex;extracellularregion;cytoplasm;endoplasmicreticulum;"GO:0005737,IDA;GO:0005783,IDA;GO:0005886,IDA"	LAMININ SUBUNIT GAMMA-1 PRECURSOR.
PSMC5;ATAD4	IPI00023919 ; IPI00555749 ; IPI00745502	human	Tumor only										15	9			22	8	-0.0976108	0	No	33.5	44.7893	No	intracellular;cytoplasm;cytosol;nucleus;proteincomplex;"GO:0005622,IDA;GO:0043234,IDA;GO:0005634,IDA;GO:0005737,IDA" /// proteincomplex;cytosol;nucleus;cytoplasm;	26S PROTEASE REGULATORY SUBUNIT 8.
ZNF185	IPI00005688 ; IPI00166240 ; IPI00385027 ; IPI00646811	human	Tumor only														20	8			No	21.25	50.0427	No	plasmamembrane;cytoplasm;nucleus;"GO:0005737,IDA;GO:0005886,IDA" /// plasmamembrane;nucleus;cytoplasm;"GO:0005634,IDA;GO:0005737,IDA;GO:0005886,IDA"	ZINC FINGER PROTEIN 185.
PPP2R5E	IPI00002853 ; IPI00556528	human	Tumor only										4	3	-0.176323	0	1	1			No	30.5	52.3591	No	intracellular;organelle;cytoplasm;proteincomplex;"GO:0043226,IDA;GO:0005622,IDA" /// proteincomplex;intracellular;	SERINE/THREONINE-PROTEIN PHOSPHATASE 2A 56 KDA REGULATORY SUBUNIT EPSILON ISOFORM.
KHSRP	IPI00479786 ; IPI00855957	human	Tumor only										56	16	0.200913	0.09	5	3	0.415037	0	No	43	55.9672	No	nucleus;cytoplasm;	ISOFORM 1 OF FAR UPSTREAM ELEMENT-BINDING PROTEIN 2.
ARF1;ARF3	IPI00215914 ; IPI00215917	human	Tumor only										35	6			28	4			No	15	28.2829	Yes	plasmamembrane;cytosol;intracellular;cytoplasm;Golgiapparatus;"GO:0005794,EXP;GO:0005794,EXP;GO:0005794,EXP;GO:0005829,EXP" /// intracellular;Golgiapparatus;	ADP-RIBOSYLATION FACTOR 1.
U2AF2	IPI00031556 ; IPI00830039	human	Tumor only										9	3			4	3	0.888969	0.07	No	23	53.9828	No	nucleus;"GO:0005634,IDA" /// nucleus;	SPLICING FACTOR U2AF 65 KDA SUBUNIT.
CAPNS1	IPI00025084	human	Tumor only										23	5	-0.0285692	0.14	36	7	0.514573	0.05	No	15	57.1925	No	plasmamembrane;cytoplasm;nucleus;"GO:0005634,IDA"	CALPAIN SMALL SUBUNIT 1.
UBE2K	IPI00021370 ; IPI00878126	human	Tumor only										2	2			2	1			No	11.5	30.1809	Yes	cytoplasm;	ISOFORM 1 OF UBIQUITIN-CONJUGATING ENZYME E2 K.
DKC1	IPI00221394 ; IPI00852712 ; IPI00852780 ; IPI00873935 ; IPI00874145 ; IPI00893397 ; IPI00893630	human	Tumor only														2	2			No	16.6	44.2528	No	nucleolus;nucleoplasm;nucleus;"GO:0005634,IDA" /// nucleolus;nucleus;"GO:0005634,IDA;GO:0005730,IDA"	H/ACA RIBONUCLEOPROTEIN COMPLEX SUBUNIT 4.
RHOC	IPI00027434 ; IPI00647268	human	Tumor only										10	4	0.184425	0.11	14	5	0.234465	0.04	No	15	60.1413	No	plasmamembrane;intracellular; /// intracellular;	RHO-RELATED GTP-BINDING PROTEIN RHOC PRECURSOR.
GPSN2	IPI00100656 ; IPI00644037	human	Tumor only										1	1			4	2			No	19	41.0984	No	cell;cytoplasm;endoplasmicreticulum;	ISOFORM 1 OF SYNAPTIC GLYCOPROTEIN SC2.
GMFB	IPI00412987 ; IPI00549557 ; IPI00555789	human	Tumor only										5	2	0.304006	0	7	2			No	8	43.2123	No	nucleus;mitochondrion;intracellular;"GO:0005634,IDA;GO:0005739,IDA" /// intracellular;	GMFB PROTEIN.
ASCC3L1	IPI00420014 ; IPI00740142	human	Tumor only										15	6			24	13	0.599462	0	No	123	44.4556	No	nucleus;"GO:0005634,IDA;GO:0005634,IDA"	ISOFORM 1 OF U5 SMALL NUCLEAR RIBONUCLEOPROTEIN 200 KDA HELICASE.
NIT2	IPI00549467 ; IPI00872668	human	Tumor only										9	6	0.184425	0.02	8	4	0.434403	0.02	No	24	35.2747	Yes	mitochondrion;cellular_component;cytoplasm;	NITRILASE HOMOLOG 2.
SCRIB;LRRC1	IPI00410666 ; IPI00425560 ; IPI00425562 ; IPI00425566 ; IPI00427741	human	Tumor only										3	3			2	1			No	72	60.3762	No	cell;cytoplasm;	ISOFORM 3 OF PROTEIN LAP4.
PHB	IPI00017334 ; IPI00791634	human	Tumor only										27	7	-0.0703893	0.06	31	6	-0.0703893	0.04	No	22	43.7776	No	cell;plasmamembrane;nucleoplasm;nucleus;mitochondrion;"GO:0005654,IDA;GO:0005886,IDA" /// cell;mitochondrion;	PROHIBITIN.
VAC14	IPI00011956 ; IPI00025160	human	Tumor only										1	1			4	4	0.251539	0	No	30.5	38.7653	No	cellular_component;	19 KDA PROTEIN.
HMGCS1	IPI00008475	human	Tumor only										4	4	0.0439433	0.24	30	9	-0.604071	0.07	No	25	29.2427	Yes	cytoplasm;cell;cytosol;"GO:0005829,EXP"	HYDROXYMETHYLGLUTARYL-COA SYNTHASE, CYTOPLASMIC.
RPSA	IPI00413108 ; IPI00553164	human	Tumor only										24	8	-1.11103	0.77	58	10	-1.51096	1.07	No	17	35.0053	Yes	cytosol;nucleus;intracellular;ribosome;cytoplasm;"GO:0005829,EXP"	33 KDA PROTEIN.
RPS3	IPI00011253	human	Tumor only										45	8	-0.807355	0.24	55	8	-0.163499	0	No	21	35.9441	Yes	intracellular;ribosome;plasmamembrane;cytoplasm;cytosol;nucleus;"GO:0005634,IDA;GO:0005634,IDA;GO:0005737,IDA;GO:0005829,IDA;GO:0005829,EXP;GO:0005840,IDA;GO:0005829,IDA;GO:0005840,IDA;GO:0005829,IDA;GO:0005886,IDA"	40S RIBOSOMAL PROTEIN S3.
PDIA6	IPI00299571 ; IPI00644989	human	Tumor only										69	9	-0.226509	0.06	61	11	0.0892673	0.02	No	26	41.6782	No	intracellular;organelle;cytoplasm;endoplasmicreticulum;cytoplasmicmembrane-boundedvesicle;"GO:0005737,IDA"	ISOFORM 2 OF PROTEIN DISULFIDE-ISOMERASE A6 PRECURSOR.
SF3A3	IPI00029764	human	Tumor only										9	7	0.136062	0	10	4			No	34	40.0305	No	nucleoplasm;nucleus;intracellular;"GO:0005634,IDA"	SPLICING FACTOR 3A SUBUNIT 3.
	IPI00218924	human	Tumor only										6	3							No	16	37.1318	Yes	intracellular;organelle;cytoplasm;"GO:0043226,IDA;GO:0005622,IDA"	CALCIUM-BINDING PROTEIN P22.
CAND1;C22orf32	IPI00100160 ; IPI00604431 ; IPI00746694	human	Tumor only										44	20	0.0439433	0.04	59	25	0.0588937	0.08	No	70.5	47.7153	No	nucleus;proteincomplex;intracellular;"GO:0005622,IDA;GO:0043234,IDA;GO:0005634,IDA"	ISOFORM 1 OF CULLIN-ASSOCIATED NEDD8-DISSOCIATED PROTEIN 1.
S100A10	IPI00183695	human	Tumor only										7	2	0.415037	0	13	1			No	8	26.6381	Yes	mitochondrion;"GO:0005739,IDA"	PROTEIN S100-A10.
SDHB	IPI00294911	human	Tumor only										9	4	-0.422233	0.02	6	4			No	24	60.1307	No	cell;mitochondrion;"GO:0005739,EXP"	SUCCINATE DEHYDROGENASE [UBIQUINONE] IRON-SULFUR SUBUNIT, MITOCHONDRIAL PRECURSOR.
	IPI00143753 ; IPI00788772 ; IPI00790699 ; IPI00791877 ; IPI00829908	human	Tumor only										3	3			1	1			not annotated	45.75	57.1334	No		ISOFORM 1 OF U2-ASSOCIATED PROTEIN SR140.
DPF2	IPI00023322	human	Tumor only										4	3	0.473931	0	1	1			No	26	64.6977	No	intracellular;cytoplasm;nucleus;	ZINC FINGER PROTEIN UBI-D4.
PFDN2	IPI00006052	human	Tumor only										6	3			12	3			No	14	27.0935	Yes	proteincomplex;cytosol;	PREFOLDIN SUBUNIT 2.
H2AFX	IPI00219037	human	Tumor only														92	3			No	9	50.6168	No	nucleoplasm;nucleus;chromosome;"GO:0005634,IDA;GO:0005634,IDA;GO:0005654,EXP;GO:0005654,EXP;GO:0005654,EXP"	HISTONE H2A.X.
	IPI00008293	human	Tumor only														8	2			not annotated	14	44.2632	No		SIMILAR TO MCG19129.
SPTAN1	IPI00744706 ; IPI00843765	human	Tumor only										127	54	0.136062	0.04	104	43	0.217591	0.02	No	207	42.5568	No	cell;cytosol;cytoskeleton;cytoplasm;"GO:0005829,EXP;GO:0005856,IDA"	282 KDA PROTEIN.
SHC1	IPI00021326 ; IPI00165135 ; IPI00513796 ; IPI00643176 ; IPI00643863 ; IPI00645103 ; IPI00647867	human	Tumor only										2	2							No	24.25	52.7254	No	plasmamembrane;cytosol;mitochondrion;cytoplasm;"GO:0005829,EXP;GO:0005829,EXP;GO:0005829,EXP;GO:0005829,EXP;GO:0005829,EXP;GO:0005829,EXP;GO:0005886,IDA"	63 KDA PROTEIN.
PLP2	IPI00030362	human	Tumor only										5	2	-0.695994	0.11	6	2	-0.0976108	0.02	No	7	40.8651	No	plasmamembrane;cell;endoplasmicreticulum;"GO:0005886,IDA"	PROTEOLIPID PROTEIN 2.
STX12	IPI00329332 ; IPI00513853	human	Tumor only										11	6	0.304006	0	8	4			No	19.5	55.7217	No	cell;cytoplasmicmembrane-boundedvesicle;Golgiapparatus;"GO:0005623,IDA;GO:0016023,IDA" /// cell;	SYNTAXIN-12.
RBMX	IPI00304692 ; IPI00816796	human	Tumor only										31	8			20	7			No	41	63.9376	No	nucleus; /// intracellular;	HETEROGENEOUS NUCLEAR RIBONUCLEOPROTEIN G.
CDC42	IPI00016786 ; IPI00070778	human	Tumor only										33	5	0.321928	0.04	8	3	0.120294	0.03	No	10	44.0628	No	intracellular;cell;plasmamembrane;cytoplasm;cytosol;"GO:0005737,IDA;GO:0005829,EXP;GO:0005829,EXP;GO:0005886,IDA;GO:0005623,IDA"	ISOFORM 2 OF CELL DIVISION CONTROL PROTEIN 42 HOMOLOG PRECURSOR.
COPZ1	IPI00032851 ; IPI00790808 ; IPI00791413 ; IPI00792095 ; IPI00792696	human	Tumor only										2	1			7	3			No	4.33333	48.6933	No	cell;proteincomplex;cytosol;organelle;cytoplasm;cytoplasmicmembrane-boundedvesicle;Golgiapparatus;"GO:0005829,EXP;GO:0005829,EXP;GO:0016023,IDA;GO:0005794,IDA;GO:0043234,IDA" /// proteincomplex;cytoplasm;	COATOMER SUBUNIT ZETA-1.
GNB2	IPI00003348	human	Tumor only										45	8	0.321928	0.04	24	5	0.0291463	0.05	not annotated	18	45.4182	No		GUANINE NUCLEOTIDE-BINDING PROTEIN G(I)/G(S)/G(T) SUBUNIT BETA-2.
PEPD	IPI00257882 ; IPI00872063 ; IPI00887276	human	Tumor only										3	2			2	1			not annotated	29.5	34.9633	Yes		XAA-PRO DIPEPTIDASE.
SFPQ	IPI00010740	human	Tumor only										54	13	0.621488	0.02	70	13	0.785875	0.05	No	40	66.1839	No	nucleus;	ISOFORM LONG OF SPLICING FACTOR, PROLINE- AND GLUTAMINE-RICH.
DYNLL1	IPI00019329	human	Tumor only										8	1	0.514573	0.03	32	4	0.556393	0.04	No	6	42.7416	No	plasmamembrane;cytoplasm;proteincomplex;cytosol;cytoskeleton;"GO:0005737,IDA;GO:0005829,EXP;GO:0005886,EXP"	DYNEIN LIGHT CHAIN 1, CYTOPLASMIC.
VAMP2	IPI00553138 ; IPI00790248	human	Tumor only										4	2							No	6	38.5415	Yes	cell;plasmamembrane;cellular_component;organelle;cytoplasm; /// cell;	VESICLE-ASSOCIATED MEMBRANE PROTEIN 2.
ABI1	IPI00431025 ; IPI00431026 ; IPI00431027 ; IPI00431029 ; IPI00431030 ; IPI00431031 ; IPI00431032 ; IPI00431033 ; IPI00431034 ; IPI00441320 ; IPI00480028 ; IPI00647003 ; IPI00827857 ; IPI00872488	human	Tumor only										5	3			3	1			No	22.5	56.0841	No	plasmamembrane;cell;cytosol;nucleus;cytoskeleton;intracellular;cellular_component;cytoplasm;endoplasmicreticulum;"GO:0005622,IDA;GO:0005623,IDA" /// cytoplasm;	ISOFORM 1 OF ABL INTERACTOR 1.
PAPSS1	IPI00011619	human	Tumor only										3	3			8	3	0.494109	0	not annotated	41	37.4537	Yes		BIFUNCTIONAL 3'-PHOSPHOADENOSINE 5'-PHOSPHOSULFATE SYNTHETASE 1.
UGDH	IPI00031420	human	Tumor only										1	1			7	6	0.713119	0	not annotated	36	33.265	Yes		UDP-GLUCOSE 6-DEHYDROGENASE.
LMAN2	IPI00009950	human	Tumor only										26	6	0.200913	0.19	13	6	0.136062	0.09	No	20	28.0823	Yes	organelle;cytoplasm;cell;endoplasmicreticulum;Golgiapparatus;	VESICULAR INTEGRAL-MEMBRANE PROTEIN VIP36 PRECURSOR.
SQRDL	IPI00009634 ; IPI00790715	human	Tumor only										7	4			19	6			No	25.5	26.312	Yes	mitochondrion;	SULFIDE:QUINONE OXIDOREDUCTASE, MITOCHONDRIAL PRECURSOR.
MTA2	IPI00171798	human	Tumor only										4	3			1	1			No	51	47.8556	No	nucleoplasm;proteincomplex;nucleus;	METASTASIS-ASSOCIATED PROTEIN MTA2.
SNRPA1	IPI00183920 ; IPI00297477 ; IPI00792607 ; IPI00797067	human	Tumor only										6	4	0.184425	0					No	14.5	27.7052	Yes	intracellular; /// nucleus;"GO:0005634,IDA"	NOVEL PROTEIN SIMILAR TO SMALL NUCLEAR RIBONUCLEOPROTEIN POLYPEPTIDE A' SNRPA1.
RPL9	IPI00031691 ; IPI00719047 ; IPI00789747 ; IPI00795717	human	Tumor only										42	7	0.0740006	0.07	21	6	0.0439433	0.22	No	9.66667	23.4458	Yes	nucleolus;cytosol;intracellular;ribosome;cytoplasm;"GO:0005730,IDA;GO:0005737,IDA;GO:0005829,EXP" /// intracellular;ribosome;	60S RIBOSOMAL PROTEIN L9.
DNAJC7	IPI00329629 ; IPI00794610 ; IPI00796506	human	Tumor only										4	4							not annotated	18.3333	33.9609	Yes		DNAJ HOMOLOG SUBFAMILY C MEMBER 7.
CORO1C	IPI00867509	human	Tumor only										29	8	-0.286881	0.13	43	7	0.0144996	0.14	No	30	36.4173	Yes	cytoskeleton;	CORONIN-1C_I3 PROTEIN.
EIF5B	IPI00299254	human	Tumor only										5	2			5	5			not annotated	70	51.2028	No		EUKARYOTIC TRANSLATION INITIATION FACTOR 5B.
HSPA4L	IPI00295485 ; IPI00828021	human	Tumor only										15	7	0.168123	0.15	12	3	0.340075	0.07	No	66	42.3834	No	nucleus;cytoplasm;	HEAT SHOCK 70 KDA PROTEIN 4L.
HSP90B1	IPI00027230	human	Tumor only										130	21	0.0588937	0.04	276	28	0.0740006	0.07	No	56	40.4113	No	cell;cytosol;intracellular;organelle;cytoplasm;endoplasmicreticulum;cytoplasmicmembrane-boundedvesicle;"GO:0043226,IDA;GO:0005622,IDA;GO:0005783,IDA;GO:0005623,IDA;GO:0005829,IDA;GO:0005737,IDA"	ENDOPLASMIN PRECURSOR.
RPL18A	IPI00026202	human	Tumor only										18	7	0.120294	0.23	20	5	-0.485427	0.63	No	17	45.1807	No	intracellular;ribosome;cytosol;"GO:0005829,EXP"	60S RIBOSOMAL PROTEIN L18A.
DDB1	IPI00293464	human	Tumor only										12	5			11	5			No	58	38.4563	Yes	nucleoplasm;nucleus;cytoplasm;"GO:0005654,EXP"	DNA DAMAGE-BINDING PROTEIN 1.
DBN1	IPI00003406 ; IPI00295624 ; IPI00794221	human	Tumor only										6	5							No	30.5	70.2405	No	intracellular;cell;cytoplasm;cytoskeleton; /// cell;cytoskeleton;intracellular;cytoplasm; /// intracellular;	ISOFORM 1 OF DREBRIN.
COPA	IPI00295857 ; IPI00646493	human	Tumor only										35	13	-0.526069	1.1	29	9	0.943416	0.04	Yes	86	37.9073	Yes	extracellularspace;cell;proteincomplex;cytosol;organelle;extracellularregion;cytoplasm;endoplasmicreticulum;cytoplasmicmembrane-boundedvesicle;Golgiapparatus;"GO:0005615,IDA;GO:0005623,IDA;GO:0005737,IDA;GO:0005623,IDA;GO:0005829,EXP;GO:0005829,EXP"	COATOMER SUBUNIT ALPHA.
UFM1	IPI00010207 ; IPI00477342	human	Tumor only										7	2			4	1			No	6	25.3082	Yes	cytoplasm;nucleus;	UBIQUITIN-FOLD MODIFIER 1 PRECURSOR.
RPL11	IPI00376798	human	Tumor only										31	5	0	0.06	12	5	0.200913	0	No	14	37.1596	Yes	nucleolus;cytosol;intracellular;ribosome;"GO:0005730,IDA;GO:0005829,EXP"	ISOFORM 1 OF 60S RIBOSOMAL PROTEIN L11.
PITPNB	IPI00334907 ; IPI00395939 ; IPI00878839 ; IPI00879061	human	Tumor only										6	3	0.268817	0.05	15	4	0.434403	0.11	No	19.5	30.4863	Yes	nucleus;intracellular;cytoplasm;Golgiapparatus;"GO:0005634,IDA;GO:0005634,IDA;GO:0005737,IDA"	ISOFORM 1 OF PHOSPHATIDYLINOSITOL TRANSFER PROTEIN BETA ISOFORM.
PGD	IPI00219525 ; IPI00747533	human	Tumor only										27	8	0.621488	0.11	37	13	0.251539	0.03	not annotated	32.5	26.4422	Yes		6-PHOSPHOGLUCONATE DEHYDROGENASE, DECARBOXYLATING.
DPY30	IPI00028109 ; IPI00893184 ; IPI00893460	human	Tumor only										6	2			25	2			No	7	38.5283	No	nucleus;	PROTEIN DPY-30 HOMOLOG.
ERLIN2	IPI00026942 ; IPI00793890	human	Tumor only										8	4			14	3			No	17	35.9274	Yes	cell;plasmamembrane;cytoplasm;endoplasmicreticulum;"GO:0005737,IDA;GO:0005783,IDA;GO:0005886,IDA"	ISOFORM 1 OF ERLIN-2.
PPA2	IPI00301109 ; IPI00413014 ; IPI00470502 ; IPI00470503 ; IPI00654717 ; IPI00749469	human	Tumor only										11	7	-0.176323	0	3	2			No	23.4	37.1934	No	mitochondrion;cytoplasm; /// cytoplasm;	ISOFORM 1 OF INORGANIC PYROPHOSPHATASE 2, MITOCHONDRIAL PRECURSOR.
STMN1	IPI00479997 ; IPI00642012 ; IPI00643115 ; IPI00744618	human	Tumor only										24	5			8	3			No	10.6667	55.3627	No	cytoskeleton;intracellular;cytoplasm;"GO:0005622,IDA" /// cytoplasm;	STATHMIN.
PDCD6	IPI00025277	human	Tumor only										17	6			25	6			No	10	28.3314	Yes	cell;endoplasmicreticulum;nucleus;nuclearenvelope;"GO:0005634,IDA;GO:0005783,IDA"	PROGRAMMED CELL DEATH PROTEIN 6.
SLC2A1	IPI00220194 ; IPI00872375	human	Tumor only										8	3			25	4			No	18	36.5715	Yes	plasmamembrane;cell;intracellular;cytoplasm;cytoplasmicmembrane-boundedvesicle; /// cell;	SOLUTE CARRIER FAMILY 2, FACILITATED GLUCOSE TRANSPORTER MEMBER 1.
SFRS1	IPI00215884 ; IPI00218591 ; IPI00218592	human	Tumor only										50	8	0.736966	0	17	6	0.37707	0.02	No	20	38.5473	No	nucleoplasm;nucleus;cytoplasm;	ISOFORM ASF-1 OF SPLICING FACTOR, ARGININE/SERINE-RICH 1.
ILKAP	IPI00006164	human	Tumor only										2	2	-0.176323	0					No	28	45.8286	No	cell;cytoplasm;proteincomplex;	INTEGRIN-LINKED KINASE-ASSOCIATED SERINE/THREONINE PHOSPHATASE 2C.
RPS9	IPI00221088 ; IPI00647546	human	Tumor only										20	6			10	3			No	18.5	60.6907	No	cytosol;intracellular;ribosome;"GO:0005829,EXP;GO:0005840,IDA;GO:0005829,IDA"	40S RIBOSOMAL PROTEIN S9.
PLCB3	IPI00010400 ; IPI00181283	human	Tumor only										9	5	-0.356144	0	14	7			No	68.5	58.3971	No	cell;	1-PHOSPHATIDYLINOSITOL-4,5-BISPHOSPHATE PHOSPHODIESTERASE BETA-3.
TBCA	IPI00217236 ; IPI00872214	human	Tumor only										9	2			7	2			No	12	57.3417	No	cytoskeleton;cytoplasm;	TUBULIN-SPECIFIC CHAPERONE A.
C2orf49	IPI00031698	human	Tumor only										4	2	0.304006	0					No	16	63.8892	No	cellular_component;	ASHWIN.
PSMC6	IPI00021926 ; IPI00178056	human	Tumor only										14	7	0.120294	0	20	10	0.454032	0	No	32.5	27.5095	Yes	intracellular;cytoplasm;cytosol;nucleus;proteincomplex;"GO:0005622,IDA;GO:0043234,IDA;GO:0005634,IDA"	26S PROTEASE REGULATORY SUBUNIT S10B.
ACTR1A	IPI00029468	human	Tumor only										12	5			23	6			No	26	37.3093	Yes	proteincomplex;cytoskeleton;microtubuleorganizingcenter;cytoplasm;	ALPHA-CENTRACTIN.
H2AFY	IPI00059366 ; IPI00304171 ; IPI00744148	human	Tumor only										44	6	0.395929	0.05	19	7	-0.31034	0	No	21	35.1715	Yes	nucleus;chromosome;nuclearchromosome;"GO:0000228,IDA"	H2A HISTONE FAMILY, MEMBER Y ISOFORM 2.
IRF6	IPI00024290 ; IPI00645422	human	Tumor only										4	2	0.168123	0.01	10	6	-0.163499	0.26	No	19.5	49.8358	No	nucleus;	INTERFERON REGULATORY FACTOR 6.
MMAB	IPI00029665 ; IPI00789857 ; IPI00795427	human	Tumor only										3	3	-0.298658	0	4	2	0.785875	0.05	No	14	38.6968	Yes	mitochondrion;	COB.
STK24	IPI00002212 ; IPI00641189 ; IPI00872754	human	Tumor only										5	5	-0.545968	0	4	2	1.05889	0	No	18	48.9621	No	cytoplasm;	ISOFORM B OF SERINE/THREONINE-PROTEIN KINASE 24.
PLOD2	IPI00337495 ; IPI00472165	human	Tumor only														5	5	-0.275007	0	No	49	37.5699	Yes	cell;endoplasmicreticulum;	ISOFORM 2 OF PROCOLLAGEN-LYSINE,2-OXOGLUTARATE 5-DIOXYGENASE 2 PRECURSOR.
RPL30	IPI00219156 ; IPI00872940	human	Tumor only										48	4	0.0144996	0.11	35	4	0.0291463	0.08	No	8.5	61.6026	No	cytosol;intracellular;ribosome;cytoplasm;"GO:0005737,IDA;GO:0005829,EXP" /// intracellular;ribosome;cytoplasm;"GO:0005737,IDA"	60S RIBOSOMAL PROTEIN L30.
ELAVL1	IPI00301936	human	Tumor only										12	7			8	2			No	20	36.0052	Yes	nucleus;	ELAV-LIKE PROTEIN 1.
CRK	IPI00004838 ; IPI00399054	human	Tumor only										10	5			6	2			No	17	68.622	No	endosome;plasmamembrane;cytoplasm;cytosol;nucleus;"GO:0005768,EXP;GO:0005829,EXP" /// plasmamembrane;cytosol;nucleus;endosome;cytoplasm;"GO:0005768,EXP;GO:0005829,EXP"	ISOFORM CRK-II OF PROTO-ONCOGENE C-CRK.
CKAP4	IPI00141318 ; IPI00604713 ; IPI00883950	human	Tumor only										58	19	-0.333424	0.07	257	24	0.268817	0.04	No	46.6667	62.76	No	cell;organelle;cytoplasm;endoplasmicreticulum;	ISOFORM 1 OF CYTOSKELETON-ASSOCIATED PROTEIN 4.
CRIP1	IPI00215611	human	Tumor only										9	2	-0.176323	0.04	4	2	1.12029	0	No	5	22.5935	Yes	cytoplasm;	CYSTEINE-RICH PROTEIN 1.
PPP1R8	IPI00030383 ; IPI00142629 ; IPI00645094 ; IPI00655724	human	Tumor only										5	3			2	2			No	10.3333	51.1291	No	nucleoplasm;nucleus;cytoplasm;	ISOFORM ALPHA OF NUCLEAR INHIBITOR OF PROTEIN PHOSPHATASE 1.
FLNC	IPI00178352 ; IPI00413958	human	Tumor only										15	6	0.358454	0.07	25	5	0	0.07	No	170	37.5472	Yes	plasmamembrane;cytoskeleton;cytoplasm;"GO:0005737,IDA;GO:0005886,IDA;GO:0005886,IDA"	ISOFORM 1 OF FILAMIN-C.
IK	IPI00011875 ; IPI00883647	human	Tumor only										5	4							Yes	40	44.6977	No	extracellularspace;cell;nucleus; /// nucleus;	PROTEIN RED.
IPO4	IPI00156374 ; IPI00398009 ; IPI00744488	human	Tumor only														7	6	0.104697	0	No	47.5	53.7037	No	proteincomplex;nucleus;nuclearenvelope;cytoplasm;	ISOFORM 1 OF IMPORTIN-4.
HNRPDL	IPI00011274 ; IPI00045498 ; IPI00845282	human	Tumor only										33	6	0.454032	0.04	16	5	0.37707	0.04	No	23.3333	34.0462	No	cytoplasm;nucleus; /// nucleus;cytoplasm;	ISOFORM 1 OF HETEROGENEOUS NUCLEAR RIBONUCLEOPROTEIN D-LIKE.
CLIC1	IPI00010896 ; IPI00554767 ; IPI00877596	human	Tumor only										26	6	0.0892673	0.13	19	6	0.0740006	0.06	No	13.5	32.6938	Yes	plasmamembrane;cytoplasm;cell;nucleus;nuclearenvelope;"GO:0005623,IDA;GO:0005623,IDA;GO:0005737,IDA"	CHLORIDE INTRACELLULAR CHANNEL PROTEIN 1.
MVD	IPI00022745 ; IPI00556625 ; IPI00640007	human	Tumor only										3	3	0.37707	0	6	5	0.0291463	0	No	18	35.1681	No	cytosol;"GO:0005829,EXP"	DIPHOSPHOMEVALONATE DECARBOXYLASE.
SSRP1	IPI00005154	human	Tumor only										4	3			4	3			No	51	46.9656	No	cytoplasm;nucleoplasm;nucleus;chromosome;"GO:0005654,EXP;GO:0005737,IDA"	FACT COMPLEX SUBUNIT SSRP1.
ATP2A1	IPI00024804 ; IPI00396118 ; IPI00646947 ; IPI00872163	human	Tumor only										18	9	0.621488	0.04	35	11	-0.831877	0.08	No	57.5	34.4814	Yes	cell;cytoplasm;endoplasmicreticulum;"GO:0005783,IDA;GO:0005737,IDA;GO:0005737,IDA" /// cell;	ISOFORM SERCA1B OF SARCOPLASMIC/ENDOPLASMIC RETICULUM CALCIUM ATPASE 1.
ARFIP1	IPI00021258 ; IPI00744919	human	Tumor only										8	4			8	6			No	25	34.3298	Yes	cytosol;Golgiapparatus;"GO:0005794,IDA;GO:0005829,IDA"	ISOFORM B OF ARFAPTIN-1.
SRP14	IPI00293434 ; IPI00789296 ; IPI00790432	human	Tumor only										8	4			9	2			No	7	28.0477	Yes	cytoplasm;	SIGNAL RECOGNITION PARTICLE 14 KDA PROTEIN.
	IPI00550523 ; IPI00845461	human	Tumor only										31	9	0.234465	0.05	17	8	0.168123	0.03	No	31.5	32.8588	Yes	cell;	ISOFORM 1 OF ATLASTIN-3.
ACACA	IPI00011569 ; IPI00396015 ; IPI00396018 ; IPI00793409 ; IPI00847501	human	Tumor only										2	2							No	150.5	40.4583	No	cytoplasm;	ISOFORM 1 OF ACETYL-COA CARBOXYLASE 1.
HK3;HK2	IPI00005118 ; IPI00102864 ; IPI00555601	human	Tumor only										4	3							No	50.6667	34.934	Yes	cell;cytosol;"GO:0005829,EXP" /// cell;cytosol;mitochondrion;"GO:0005829,EXP"	HEXOKINASE-3.
KIAA0196	IPI00029175 ; IPI00748472	human	Tumor only										1	1			2	2			not annotated	87	39.6283	Yes		STRUMPELLIN.
DUT	IPI00013679 ; IPI00749113 ; IPI00793322 ; IPI00794545	human	Tumor only										13	6	-0.263034	0	4	3			No	14.3333	25.0043	Yes	cytosol;nucleus;mitochondrion;"GO:0005829,EXP" /// mitochondrion;	ISOFORM DUT-M OF DEOXYURIDINE 5'-TRIPHOSPHATE NUCLEOTIDOHYDROLASE, MITOCHONDRIAL PRECURSOR.
DEK	IPI00020021 ; IPI00425937 ; IPI00871695	human	Tumor only										8	2			2	2			No	21.3333	28.9158	No	nucleus;	PROTEIN DEK.
DNAJB11	IPI00008454	human	Tumor only										3	2			16	4	-0.0840643	0.09	No	25	37.9662	Yes	intracellular;organelle;cytoplasm;endoplasmicreticulum;nucleus;	DNAJ HOMOLOG SUBFAMILY B MEMBER 11 PRECURSOR.
TAX1BP3	IPI00005585	human	Tumor only										4	3			6	2			No	10	60.1331	No	cytoplasm;nucleus;	TAX1-BINDING PROTEIN 3.
PSMA3	IPI00171199 ; IPI00419249	human	Tumor only										5	2			2	2	-0.124328	0	No	19	31.991	Yes	proteincomplex;cytosol;nucleus;cytoskeleton;intracellular;cytoplasm;"GO:0005856,IDA"	ISOFORM 2 OF PROTEASOME SUBUNIT ALPHA TYPE-3.
PRPF4	IPI00150269 ; IPI00218435	human	Tumor only										2	2							No	33	46.1994	No	nucleoplasm;nucleus;	ISOFORM 1 OF U4/U6 SMALL NUCLEAR RIBONUCLEOPROTEIN PRP4.
ILK	IPI00013219	human	Tumor only										4	4	0.321928	0	4	3			No	31	40.4316	No	plasmamembrane;cytoplasm;	INTEGRIN-LINKED PROTEIN KINASE.
GCN1L1	IPI00001159	human	Tumor only										16	7			43	22	3.8365	0	No	197	45.1611	No	ribosome;cytoplasm;	TRANSLATIONAL ACTIVATOR GCN1.
H2AFV;H2AFZ	IPI00018278 ; IPI00218448	human	Tumor only										32	4			29	4			No	8	37.343	Yes	nucleus;chromosome;	HISTONE H2AV.
SCYL2	IPI00396218	human	Tumor only														2	2			No	55	47.8617	No	cell;organelle;endosome;cytoplasm;Golgiapparatus;	SCY1-LIKE PROTEIN 2.
CUL1	IPI00014310	human	Tumor only										3	3							No	59	45.1896	No	intracellular;nucleoplasm;proteincomplex;cytosol;"GO:0005654,EXP;GO:0005829,EXP;GO:0005829,EXP"	CULLIN-1.
HEXA	IPI00027851	human	Tumor only										4	3			4	4			No	30	35.0456	Yes	cell;lysosome;	BETA-HEXOSAMINIDASE SUBUNIT ALPHA PRECURSOR.
TNPO1	IPI00024364 ; IPI00843876	human	Tumor only										7	5	0.494109	0.01	7	5	0.251539	0.03	No	46.5	51.1588	No	proteincomplex;nucleus;nuclearenvelope;cytoplasm;	TRANSPORTIN 1 ISOFORM 1.
CSNK2A1	IPI00016613 ; IPI00744507	human	Tumor only										6	2			14	6			No	22.5	47.7179	No	plasmamembrane;nucleus;	CSNK2A1 PROTEIN.
ENSA	IPI00220797 ; IPI00383552 ; IPI00410177 ; IPI00410178 ; IPI00470835 ; IPI00644717 ; IPI00872471	human	Tumor only										7	2			8	4			No	11	58.1606	No	cytoplasm;	ISOFORM 2 OF ALPHA-ENDOSULFINE.
LEMD2	IPI00168336 ; IPI00514106	human	Tumor only										5	4			3	3			No	30.5	59.6696	No	cell;nucleus;nuclearenvelope; /// nuclearenvelope;	LEM DOMAIN-CONTAINING PROTEIN 2.
RABGAP1	IPI00016702 ; IPI00856033	human	Tumor only										2	2			6	5			No	58.5	47.8531	No	intracellular;microtubuleorganizingcenter;cytoplasm;proteincomplex;cytosol;cytoskeleton; /// proteincomplex;cytosol;cytoskeleton;intracellular;microtubuleorganizingcenter;cytoplasm;	ISOFORM 1 OF RAB GTPASE-ACTIVATING PROTEIN 1.
RAC1	IPI00010271	human	Tumor only										15	4	0.286304	0.15	13	2	0.136062	0.03	No	11	33.6031	Yes	intracellular;plasmamembrane;cytoplasm;cell;cytosol;cytoplasmicmembrane-boundedvesicle;"GO:0005829,EXP;GO:0005829,EXP;GO:0005829,EXP"	ISOFORM A OF RAS-RELATED C3 BOTULINUM TOXIN SUBSTRATE 1 PRECURSOR.
CLIP1	IPI00013455 ; IPI00027172 ; IPI00217113 ; IPI00747225	human	Tumor only										10	7							No	115.75	46.5818	No	proteincomplex;cytoskeleton;chromosome;endosome;cytoplasm;	CLIP1 PROTEIN.
PRKCDBP	IPI00056334 ; IPI00873579	human	Tumor only										6	4			9	5			not annotated	14	59.0896	No		PROTEIN KINASE C DELTA-BINDING PROTEIN.
CAB39	IPI00032561	human	Tumor only										5	4			3	3			No	30	52.961	No	cytoplasm;	CALCIUM-BINDING PROTEIN 39.
ACTR10	IPI00302690	human	Tumor only										1	1			2	2	0.251539	0	No	27	44.5168	No	proteincomplex;cytoskeleton;cytoplasm;	ACTIN-RELATED PROTEIN 10.
AGL	IPI00219065 ; IPI00219066 ; IPI00328318 ; IPI00514126 ; IPI00878798	human	Tumor only										2	2			5	4			No	103	42.807	No	proteincomplex;cytosol;"GO:0005829,EXP"	ISOFORM 5 OF GLYCOGEN DEBRANCHING ENZYME.
GLUD1;GLUD2	IPI00016801 ; IPI00027146	human	Tumor only										16	8	-0.31034	0.08	48	9	-0.0703893	0.07	No	36.5	30.2159	Yes	mitochondrion;"GO:0005739,IDA;GO:0005739,EXP" /// mitochondrion;	GLUTAMATE DEHYDROGENASE 1, MITOCHONDRIAL PRECURSOR.
UBE2D2;UBE2D3	IPI00019932 ; IPI00024013 ; IPI00332376 ; IPI00375142 ; IPI00478393 ; IPI00873993	human	Tumor only										7	3	-0.0285692	0.07	1	1	0.184425	0	not annotated	7	36.8667	No		UBIQUITIN-CONJUGATING ENZYME E2D 2 ISOFORM 2.
EIF5	IPI00022648	human	Tumor only										3	3	0.434403	0	1	1	0.810966	0	No	30	52.1575	No	cytoplasm;cytosol;	EUKARYOTIC TRANSLATION INITIATION FACTOR 5.
C9orf19	IPI00007067 ; IPI00479010 ; IPI00872817 ; IPI00874202	human	Tumor only										1	1	0.971431	0	2	2	0.321928	0	Yes	10.5	33.2516	Yes	extracellularregion;cell;Golgiapparatus; /// extracellularregion;	GOLGI-ASSOCIATED PLANT PATHOGENESIS-RELATED PROTEIN 1.
UBAP2L	IPI00029019 ; IPI00181306 ; IPI00514856	human	Tumor only										35	10			5	5			not annotated	34.6667	52.3312	No		ISOFORM 2 OF UBIQUITIN-ASSOCIATED PROTEIN 2-LIKE.
SH3GLB2	IPI00024540 ; IPI00398828 ; IPI00878250 ; IPI00894363	human	Tumor only										6	4							No	13.6667	7.39167	Yes	cytoplasm;"GO:0005737,IDA"	ISOFORM 1 OF ENDOPHILIN-B2.
ACTB	IPI00021439	human	Tumor only										1284	19	0.184425	0.07	2021	17	0.0740006	0.09	No	24	35.2947	Yes	nucleoplasm;cytoplasm;cell;proteincomplex;cytosol;cytoskeleton;"GO:0005654,IDA;GO:0043234,IDA"	ACTIN, CYTOPLASMIC 1.
CAV1	IPI00009236	human	Tumor only										14	4	-0.887525	0.1	12	2			No	14	31.545	Yes	lipidparticle;cytoplasm;plasmamembrane;endoplasmicreticulum;Golgiapparatus;"GO:0005794,EXP;GO:0005794,IDA;GO:0005783,IDA;GO:0005811,EXP;GO:0005811,EXP;GO:0005811,EXP;GO:0005811,EXP;GO:0005811,EXP;GO:0005886,IDA"	ISOFORM ALPHA OF CAVEOLIN-1.
RPL23	IPI00010153 ; IPI00791920 ; IPI00794091 ; IPI00795408 ; IPI00795751	human	Tumor only										66	6	0.68966	0.08	39	3	0.168123	0.11	No	8.33333	22.321	Yes	intracellular;ribosome;cytoplasm;cytosol;"GO:0005737,IDA;GO:0005829,EXP" /// intracellular;ribosome;	60S RIBOSOMAL PROTEIN L23.
GTF2I	IPI00054042 ; IPI00217449 ; IPI00217450 ; IPI00293242 ; IPI00889183	human	Tumor only										1	1			4	4			No	45.3333	44.5629	No	nucleus;cytoplasm;	ISOFORM 1 OF GENERAL TRANSCRIPTION FACTOR II-I.
RPL7A	IPI00299573	human	Tumor only										22	6	0.234465	0.02	23	7	-0.378512	0.05	No	19	35.8414	Yes	cell;cytosol;intracellular;ribosome;"GO:0005623,IDA;GO:0005829,EXP;GO:0005840,IDA"	60S RIBOSOMAL PROTEIN L7A.
PLRG1	IPI00002624 ; IPI00382756 ; IPI00871903	human	Tumor only										3	3							No	31.5	37.7679	Yes	nucleoplasm;nucleus;	ISOFORM 1 OF PLEIOTROPIC REGULATOR 1.
DERL2	IPI00304264	human	Tumor only										1	1			2	2			No	8	28.5418	Yes	cell;endoplasmicreticulum;"GO:0005783,IDA;GO:0005783,IDA"	DERLIN-2.
DNAJB1	IPI00015947	human	Tumor only										14	5	0.304006	0.01	6	3	0.217591	0	No	25	50.3194	No	cytoplasm;nucleus;	DNAJ HOMOLOG SUBFAMILY B MEMBER 1.
HPRT1	IPI00218493 ; IPI00873466	human	Tumor only										4	3	-0.400538	0	14	8	0.184425	0.04	No	14	22.1835	Yes	cytosol;cytoplasm;"GO:0005737,IDA;GO:0005829,EXP" /// cytoplasm;	HYPOXANTHINE-GUANINE PHOSPHORIBOSYLTRANSFERASE.
SNRPD3	IPI00017964 ; IPI00878876 ; IPI00879063 ; IPI00879750	human	Tumor only										27	4	0.286304	0.08	18	2	0.120294	0.04	No	8.5	21.96	Yes	cytoplasm;nucleoplasm;cytosol;nucleus;"GO:0005654,EXP;GO:0005737,IDA;GO:0005829,EXP"	SMALL NUCLEAR RIBONUCLEOPROTEIN SM D3.
NOLA1	IPI00302176 ; IPI00607820 ; IPI00872985	human	Tumor only										3	3	0.120294	0.03	5	1	-0.15056	0.15	No	22	45.701	No	nucleus;intracellular;	ISOFORM 1 OF H/ACA RIBONUCLEOPROTEIN COMPLEX SUBUNIT 1.
LIN7C	IPI00019997	human	Tumor only										3	2			3	1			No	17	51.2802	No	cellular_component;cell;plasmamembrane;	LIN-7 HOMOLOG C.
NCSTN	IPI00021983 ; IPI00375688 ; IPI00513841 ; IPI00514793 ; IPI00514877 ; IPI00515093	human	Tumor only										3	2			3	2			No	20.6667	38.2526	No	cell;plasmamembrane;endoplasmicreticulum;cytoplasmicmembrane-boundedvesicle;Golgiapparatus;"GO:0005783,IDA;GO:0005794,IDA;GO:0005886,IDA" /// cell; /// plasmamembrane;cell;	ISOFORM 1 OF NICASTRIN PRECURSOR.
UBA2	IPI00023234	human	Tumor only										6	3	-0.176323	0.06	7	4	0.358454	0.01	No	41	42.7378	No	nucleus;	SUMO-ACTIVATING ENZYME SUBUNIT 2.
SCAMP1	IPI00005129 ; IPI00059809	human	Tumor only										15	4			7	4			No	12	33.3191	Yes	cell;cytoplasmicmembrane-boundedvesicle; /// cell;	ISOFORM 1 OF SECRETORY CARRIER-ASSOCIATED MEMBRANE PROTEIN 1.
HDAC1;HDAC2	IPI00013774 ; IPI00514649 ; IPI00644760	human	Tumor only										1	1			5	2			No	18	34.5633	Yes	cytoplasm;nucleoplasm;nucleus;proteincomplex;"GO:0005634,IDA" /// nucleus;	HISTONE DEACETYLASE 1.
MAP7D1	IPI00167009 ; IPI00645814 ; IPI00654605 ; IPI00827687 ; IPI00867630	human	Tumor only										12	3			2	1			not annotated	39	80.1896	No		ISOFORM 3 OF MAP7 DOMAIN-CONTAINING PROTEIN 1.
YWHAH	IPI00216319	human	Tumor only										31	5	-0.176323	0.03	18	7	0.514573	0	No	20	38.6012	Yes	cytoplasm;	14-3-3 PROTEIN ETA.
ADRM1	IPI00033030 ; IPI00470921	human	Tumor only										2	2	-0.0840643	0					No	15	54.1951	No	plasmamembrane;cell;cytosol;nucleus;proteincomplex;intracellular;cytoplasm;"GO:0005622,IDA;GO:0043234,IDA" /// nucleus;cytoplasm;	PROTEIN ADRM1.
CTTNBP2NL	IPI00514311	human	Tumor only										3	3							No	42	58.9211	No	nucleolus;cytoskeleton;cytoplasm;"GO:0005730,IDA;GO:0005737,IDA;GO:0005856,IDA"	CTTNBP2 N-TERMINAL-LIKE PROTEIN.
SRXN1	IPI00168554	human	Tumor only										3	3	-0.0565835	0					No	11	47.3832	No	cytosol;cytoplasm;"GO:0005829,IDA"	SULFIREDOXIN-1.
CTNNBL1	IPI00472981 ; IPI00645320 ; IPI00844214	human	Tumor only										2	2			3	3			No	28	55.0061	No	nucleus;	ISOFORM 2 OF BETA-CATENIN-LIKE PROTEIN 1.
LMAN2L	IPI00218337 ; IPI00744259	human	Tumor only										4	2			1	1			No	22	37.3583	Yes	cell;endoplasmicreticulum;cytoplasmicmembrane-boundedvesicle;Golgiapparatus;"GO:0005783,IDA;GO:0005794,IDA"	ISOFORM 2 OF VIP36-LIKE PROTEIN PRECURSOR.
STX6	IPI00013930	human	Tumor only										4	3			3	2			No	15	47.7518	No	endosome;cytoplasm;cell;plasmamembrane;cytoplasmicmembrane-boundedvesicle;Golgiapparatus;"GO:0005768,IDA;GO:0005737,IDA"	SYNTAXIN-6.
FSD1L	IPI00807522	human	Tumor only										73	3			137	3			No	6	27.5573	Yes	cell;cytosol;	ACTB PROTEIN (FRAGMENT).
ZCCHC8	IPI00166422 ; IPI00556594 ; IPI00794534 ; IPI00797483	human	Tumor only										2	2							No	22.25	42.1584	No	nucleus;	ISOFORM 2 OF ZINC FINGER CCHC DOMAIN-CONTAINING PROTEIN 8.
PRPF8	IPI00007928	human	Tumor only										1	1			20	12			No	155	42.2538	No	nucleoplasm;nucleus;	PRE-MRNA-PROCESSING-SPLICING FACTOR 8.
PDHA1	IPI00306301 ; IPI00553155 ; IPI00642732 ; IPI00642820 ; IPI00643575 ; IPI00885186	human	Tumor only										10	5	0.200913	0.06	4	3			No	16.8	30.8137	Yes	mitochondrion;	MITOCHONDRIAL PDHA1.
TAF15	IPI00020194 ; IPI00294426 ; IPI00873762	human	Tumor only										20	8	0.358454	0.02	10	4	0.454032	0	No	42.5	42.215	No	intracellular;nucleus; /// nucleus;intracellular;	ISOFORM SHORT OF TATA-BINDING PROTEIN-ASSOCIATED FACTOR 2N.
CDC5L	IPI00465294	human	Tumor only										8	5			3	2			No	53	54.7001	No	nucleoplasm;nucleolus;nucleus;cytoplasm;"GO:0005730,IDA"	CELL DIVISION CYCLE 5-LIKE PROTEIN.
FKBP1A	IPI00413778 ; IPI00647507 ; IPI00847442 ; IPI00873810	human	Tumor only										66	3	0.304006	0.11	33	3	0.395929	0.06	No	7.66667	39.8152	No	cytosol;cytoplasm;endoplasmicreticulum;"GO:0005829,IDA"	PEPTIDYL-PROLYL CIS-TRANS ISOMERASE.
HDGF	IPI00020956 ; IPI00514127 ; IPI00514330	human	Tumor only										25	4			25	5	2	0	Yes	18	64.4086	No	extracellularspace;cytoplasm;nucleus;	HEPATOMA-DERIVED GROWTH FACTOR.
RPL36AL	IPI00056494 ; IPI00176574 ; IPI00477114 ; IPI00738898 ; IPI00742027 ; IPI00786911 ; IPI00790743	human	Tumor only										8	4	0.577767	0.08	11	2	0.836501	0	No	10	37.2632	No	intracellular;ribosome;cytoplasm; /// intracellular;ribosome;	60S RIBOSOMAL PROTEIN L36A-LIKE.
TST	IPI00216293 ; IPI00878140	human	Tumor only										2	2			1	1			No	17	37.6395	No	plasmamembrane;mitochondrion;cytoskeleton;"GO:0005856,IDA;GO:0005886,IDA" /// mitochondrion;	THIOSULFATE SULFURTRANSFERASE.
PRPF31	IPI00292000 ; IPI00657678 ; IPI00657721 ; IPI00657750 ; IPI00657783 ; IPI00738596 ; IPI00893875	human	Tumor only										3	2	-0.163499	0	1	1			No	18.1429	53.2093	No	nucleoplasm;nucleus;"GO:0005654,IDA;GO:0005654,IDA;GO:0005634,IDA"	ISOFORM 1 OF U4/U6 SMALL NUCLEAR RIBONUCLEOPROTEIN PRP31.
FUS	IPI00221354 ; IPI00260715 ; IPI00645208 ; IPI00785172	human	Tumor only										40	6	0.643856	0.01	28	6	0.168123	0	No	22.5	29.482	No	nucleus;intracellular;	ISOFORM SHORT OF RNA-BINDING PROTEIN FUS.
CLASP1	IPI00396279 ; IPI00744551 ; IPI00828013	human	Tumor only										2	2							No	117	48.0352	No	proteincomplex;cytoskeleton;chromosome;microtubuleorganizingcenter;cytoplasm;Golgiapparatus;"GO:0005794,IDA;GO:0005856,IDA;GO:0005856,IDA;GO:0005737,IDA;GO:0005815,IDA"	ISOFORM 1 OF CLIP-ASSOCIATING PROTEIN 1.
CNOT1	IPI00166010 ; IPI00642900 ; IPI00880052	human	Tumor only														4	4			not annotated	135.667	44.1236	No		ISOFORM 1 OF CCR4-NOT TRANSCRIPTION COMPLEX SUBUNIT 1.
DDX17	IPI00023785 ; IPI00651653 ; IPI00651677 ; IPI00889541	human	Tumor only										23	10	0.761213	0	19	8			No	40.5	44.6992	No	nucleus;	DEAD BOX POLYPEPTIDE 17 ISOFORM 1.
NOMO1;NOMO3;NOMO2	IPI00329352 ; IPI00333985 ; IPI00413732 ; IPI00465432 ; IPI00872411 ; IPI00889050	human	Tumor only										1	1			8	4			No	59.8	37.6149	Yes	cell;cellular_component; /// cell;endoplasmicreticulum; /// cell;	NODAL MODULATOR 1 PRECURSOR.
RPL31	IPI00026302 ; IPI00848331 ; IPI00856058 ; IPI00887042	human	Tumor only										6	3			11	4			No	10	40.9612	No	intracellular;ribosome;cytosol;"GO:0005829,EXP" /// intracellular;ribosome;	60S RIBOSOMAL PROTEIN L31.
TNNT3	IPI00337454 ; IPI00337455 ; IPI00394740 ; IPI00477427 ; IPI00641544 ; IPI00657711 ; IPI00658138 ; IPI00747742 ; IPI00852975 ; IPI00853392 ; IPI00853443 ; IPI00872734	human	Tumor only										40	4			31	4			No	16.6667	62.0945	No	proteincomplex;cytoskeleton;cytoplasm;"GO:0005856,IDA;GO:0005737,IDA;GO:0043234,IDA;GO:0005856,IDA;GO:0005737,IDA;GO:0043234,IDA;GO:0005856,IDA;GO:0005737,IDA;GO:0043234,IDA"	UNCHARACTERIZED PROTEIN TNNT3 (FRAGMENT).
RPS13	IPI00221089	human	Tumor only										26	3			21	4			No	13	51.0027	No	nucleolus;cytosol;nucleus;intracellular;ribosome;"GO:0005634,IDA;GO:0005730,IDA;GO:0005829,EXP;GO:0005840,IDA;GO:0005829,IDA;GO:0005840,IDA;GO:0005829,IDA"	40S RIBOSOMAL PROTEIN S13.
SLC25A6	IPI00291467 ; IPI00645646	human	Tumor only										31	8	-0.263034	0.11	21	7	-0.0143553	0	No	19.5	9.36708	Yes	cell;proteincomplex;mitochondrion;	ADP/ATP TRANSLOCASE 3.
TES	IPI00024097 ; IPI00216425 ; IPI00873055	human	Tumor only										8	5	0.200913	0.05	7	5	0.358454	0.02	not annotated	29.5	41.4784	No		ISOFORM 1 OF TESTIN.
ATP6V1H	IPI00296191 ; IPI00414079	human	Tumor only														3	3			No	33	49.1313	No	plasmamembrane;cell;cytosol;proteincomplex;vacuole;"GO:0005829,EXP;GO:0005829,EXP;GO:0005886,EXP;GO:0005886,EXP"	ISOFORM 1 OF VACUOLAR PROTON PUMP SUBUNIT H.
NUPL1	IPI00107122 ; IPI00156037 ; IPI00550771 ; IPI00552289 ; IPI00844289	human	Tumor only										5	4							No	16.3333	33.0711	Yes	cell;proteincomplex;nucleus;nuclearenvelope; /// cell;	ISOFORM 1 OF NUCLEOPORIN P58/P45.
GUK1	IPI00182293 ; IPI00470394 ; IPI00513820 ; IPI00514021 ; IPI00514083 ; IPI00514494 ; IPI00514926 ; IPI00515106 ; IPI00644488	human	Tumor only										4	2	0.234465	0.03					No	14.8333	40.4787	No	cytosol;"GO:0005829,EXP"	GUANYLATE KINASE.
GYS1	IPI00157144 ; IPI00303868	human	Tumor only										7	3			7	3			No	43	50.1007	No	cytosol;"GO:0005829,EXP;GO:0005829,EXP"	GYS1 PROTEIN.
KPNA4	IPI00012578	human	Tumor only										4	4	0.395929	0	11	7	0.0291463	0.05	No	20	40.0013	No	cytoplasm;proteincomplex;nucleus;nuclearenvelope;	IMPORTIN SUBUNIT ALPHA-4.
HNRNPA2B1	IPI00396378	human	Tumor only										165	14	0.168123	0.07	148	13	0.454032	0	No	22	37.8263	Yes	nucleus;"GO:0005634,IDA;GO:0005634,IDA"	ISOFORM B1 OF HETEROGENEOUS NUCLEAR RIBONUCLEOPROTEINS A2/B1.
MPI	IPI00219358 ; IPI00332187 ; IPI00748640	human	Tumor only										3	3			1	1	0.785875	0	No	17.3333	41.1967	No	cytoplasm;	ISOFORM 1 OF MANNOSE-6-PHOSPHATE ISOMERASE.
DAP	IPI00018117	human	Tumor only										4	2			1	1			not annotated	8	50.0735	No		DEATH-ASSOCIATED PROTEIN 1.
EIF3K	IPI00033143	human	Tumor only										3	2			3	2	-0.111031	0.02	No	14	35.7734	Yes	proteincomplex;cytosol;nucleus;cytoplasm;"GO:0005829,EXP"	EUKARYOTIC TRANSLATION INITIATION FACTOR 3 SUBUNIT K.
RPL34	IPI00219160 ; IPI00247707 ; IPI00741167	human	Tumor only										6	3	0.268817	0.01					No	8.5	22.5308	Yes	cytosol;intracellular;ribosome;"GO:0005829,EXP"	60S RIBOSOMAL PROTEIN L34.
TUBG1;TUBG2	IPI00295081 ; IPI00299830	human	Tumor only										3	2			2	2			No	24	33.5914	Yes	proteincomplex;cytoskeleton;cytoplasm;microtubuleorganizingcenter;nuclearchromosome;"GO:0005737,IDA;GO:0005856,IDA" /// proteincomplex;cytoskeleton;microtubuleorganizingcenter;	TUBULIN GAMMA-1 CHAIN.
PABPC1	IPI00008524 ; IPI00410017 ; IPI00796945	human	Tumor only										75	13	0.136062	0.22	69	10	-0.545968	0.72	No	47.3333	38.5872	No	cytoplasm;cytosol;nucleus;"GO:0005829,EXP" /// cytosol;nucleus;cytoplasm;"GO:0005829,EXP"	ISOFORM 1 OF POLYADENYLATE-BINDING PROTEIN 1.
CBX1	IPI00010320	human	Tumor only										25	3	0.340075	0.02	16	4	0.358454	0.01	No	14	53.0406	No	nucleoplasm;nuclearchromosome;nucleus;cytoskeleton;chromosome;"GO:0005694,IDA;GO:0005856,IDA"	CHROMOBOX PROTEIN HOMOLOG 1.
MTPN	IPI00179589	human	Tumor only										21	3	0.395929	0.03	26	4	0.304006	0.01	No	11	21.3554	Yes	intracellular;cellular_component;cytoplasm;"GO:0005622,IDA"	MYOTROPHIN.
AP2B1	IPI00784156 ; IPI00784366 ; IPI00790702	human	Tumor only										17	10			19	10	0.810966	0.26	No	47.5	37.9548	Yes	plasmamembrane;proteincomplex;cytosol;cytoplasm;"GO:0005829,EXP;GO:0005829,EXP" /// proteincomplex;cytoplasm;	ISOFORM 1 OF AP-2 COMPLEX SUBUNIT BETA-1.
	IPI00742127	human	Tumor only										11	3							not annotated	15	36.3121	Yes		SIMILAR TO HETEROGENEOUS NUCLEAR RIBONUCLEOPROTEIN A1 (HELIX- DESTABILIZING PROTEIN) (SINGLE-STRAND RNA-BINDING PROTEIN) (HNRNP CORE PROTEIN A1). ISOFORM A1-A.
CCDC53	IPI00032848	human	Tumor only										2	2							No	9	56.2969	No	cellular_component;	COILED-COIL DOMAIN-CONTAINING PROTEIN 53.
ATP13A1	IPI00034277 ; IPI00218353 ; IPI00218354 ; IPI00383052	human	Tumor only										2	2							No	48	43.9776	No	cell;	ISOFORM A OF PROBABLE CATION-TRANSPORTING ATPASE 13A1.
BUB3	IPI00013468 ; IPI00514701 ; IPI00644108 ; IPI00644568	human	Tumor only										12	6	0.0588937	0	7	2			No	15.6667	34.5241	No	cytosol;nucleus;proteincomplex;chromosome;"GO:0005829,EXP;GO:0005829,EXP;GO:0005829,EXP"	MITOTIC CHECKPOINT PROTEIN BUB3.
COBLL1	IPI00007133 ; IPI00411553 ; IPI00807339 ; IPI00807728 ; IPI00873133	human	Tumor only										2	2							not annotated	73	59.0193	No		ISOFORM 3 OF CORDON-BLEU PROTEIN-LIKE 1.
EFTUD2	IPI00003519	human	Tumor only										36	16	0.217591	0.07	33	18	0.454032	0.02	No	58	38.2407	Yes	nucleus;	116 KDA U5 SMALL NUCLEAR RIBONUCLEOPROTEIN COMPONENT.
CYB5R3	IPI00328415 ; IPI00446235 ; IPI00871319	human	Tumor only										16	7	-0.15056	0	24	8	0.454032	0	No	16.5	45.3515	No	cell;proteincomplex;cytosol;mitochondrion;cytoplasm;endoplasmicreticulum;	ISOFORM 1 OF NADH-CYTOCHROME B5 REDUCTASE 3.
GRB2	IPI00021327 ; IPI00218070 ; IPI00790124 ; IPI00792746	human	Tumor only										8	5	0.971431	0	1	1			No	15.75	37.9323	No	organelle;cell;cytoplasm;cytosol;Golgiapparatus;"GO:0005829,EXP;GO:0005829,EXP;GO:0005829,EXP;GO:0005829,EXP;GO:0005829,EXP;GO:0005829,EXP;GO:0005829,EXP;GO:0005829,EXP;GO:0005829,EXP;GO:0005829,EXP;GO:0005829,EXP;GO:0005829,EXP;GO:0005829,EXP;GO:0005829,	ISOFORM 1 OF GROWTH FACTOR RECEPTOR-BOUND PROTEIN 2.
C12orf57	IPI00016925 ; IPI00796572	human	Tumor only										2	2			2	1			not annotated	7.5	38.7575	Yes		PROTEIN C10.
DNAJC5	IPI00023780 ; IPI00402231	human	Tumor only										2	2			9	4			No	10	34.8773	Yes	cell;cytoplasmicmembrane-boundedvesicle;	ISOFORM 2 OF DNAJ HOMOLOG SUBFAMILY C MEMBER 5.
NEDD8	IPI00020008 ; IPI00873768	human	Tumor only										1	1			6	2			No	8	46.3912	No	nucleus;	NEDD8 PRECURSOR.
BSDC1	IPI00018026 ; IPI00414093 ; IPI00844452 ; IPI00844524 ; IPI00844593	human	Tumor only										2	2							not annotated	15.5	53.0445	No		ISOFORM 3 OF BSD DOMAIN-CONTAINING PROTEIN 1.
SEC22B	IPI00006865	human	Tumor only										5	2			7	3			No	15	58.6874	No	organelle;cytoplasm;cell;endoplasmicreticulum;cytoplasmicmembrane-boundedvesicle;Golgiapparatus;	VESICLE-TRAFFICKING PROTEIN SEC22B.
VBP1	IPI00334159	human	Tumor only										7	2			5	2			No	21	50.3301	No	proteincomplex;cytosol;nucleus;cytoplasm;	VON HIPPEL-LINDAU BINDING PROTEIN 1.
NUCB2	IPI00009123	human	Tumor only										5	3			8	5			Yes	32	45.9078	No	extracellularspace;extracellularregion;plasmamembrane;cytoplasm;cytosol;endoplasmicreticulum;nucleus;nuclearenvelope;Golgiapparatus;"GO:0005737,IDA;GO:0005794,IDA"	NUCLEOBINDIN-2 PRECURSOR.
EIF3D	IPI00006181 ; IPI00791086	human	Tumor only										11	3	0.736966	0	8	4	-0.0143553	0	No	35	52.0953	No	cytoplasm;proteincomplex;cytosol;"GO:0005829,EXP"	EUKARYOTIC TRANSLATION INITIATION FACTOR 3 SUBUNIT D.
CALD1	IPI00014516 ; IPI00218694 ; IPI00218695 ; IPI00218696 ; IPI00333771 ; IPI00807611	human	Tumor only										23	9			45	13			No	42.6	70.4477	No	cytoskeleton;	ISOFORM 1 OF CALDESMON.
CAMK2D	IPI00172636 ; IPI00377185 ; IPI00430291 ; IPI00827573 ; IPI00827606 ; IPI00827625 ; IPI00827717 ; IPI00828081 ; IPI00828139 ; IPI00828178 ; IPI00876923	human	Tumor only										9	6	0.415037	0.03	8	3	0.304006	0.05	No	26.5	40.5769	No	proteincomplex;intracellular;	ISOFORM DELTA 6 OF CALCIUM/CALMODULIN-DEPENDENT PROTEIN KINASE TYPE II DELTA CHAIN.
SSB	IPI00009032	human	Tumor only										10	7	0.0740006	0.07	7	4	-0.739848	0	No	33	38.0211	Yes	intracellular;nucleus;	LUPUS LA PROTEIN.
HLA-B;HLA-C;MICA;MICB	IPI00789176	human	Tumor only														31	4	0.152003	0.15	not annotated	6	38.534	Yes		LEUCOCYTE ANTIGEN B (FRAGMENT).
LASP1;PLAC2	IPI00000861 ; IPI00015157 ; IPI00386803 ; IPI00883946	human	Tumor only										21	3			15	5	0.358454	0	No	13.5	63.3774	No	cytoplasm;cytoskeleton; /// cytoskeleton;cytoplasm;	ISOFORM 1 OF LIM AND SH3 DOMAIN PROTEIN 1.
PPP1CB	IPI00894274	human	Tumor only										9	3	-0.163499	0.11					not annotated	8	54.3293	No		10 KDA PROTEIN.
EIF6	IPI00010105 ; IPI00640731	human	Tumor only										44	4	0.37707	0.09	22	3	0.0439433	0.04	No	8	29.7829	Yes	cytoplasm;nucleus;nuclearenvelope;cytoskeleton;	EUKARYOTIC TRANSLATION INITIATION FACTOR 6.
LZTFL1	IPI00299465 ; IPI00478250 ; IPI00793317	human	Tumor only										2	2							not annotated	15.6667	42.0609	No		LEUCINE ZIPPER TRANSCRIPTION FACTOR-LIKE PROTEIN 1.
TNKS1BP1	IPI00304589 ; IPI00384104 ; IPI00855787	human	Tumor only										82	25	1.02915	0.07	50	18	0.836501	0.01	No	56.5	66.8507	No	nucleus;chromosome;cytoplasm;nuclearchromosome;	ISOFORM 1 OF 182 KDA TANKYRASE 1-BINDING PROTEIN.
SRP19	IPI00295889 ; IPI00807414	human	Tumor only										15	5	-0.137504	0.17	1	1			No	9	47.916	No	cytoplasm;	SIGNAL RECOGNITION PARTICLE 19 KDA PROTEIN.
	IPI00001830	human	Tumor only										5	2	0.340075	0.02					No	13	44.1196	No	nucleus;chromosome;	HETEROCHROMATIN-SPECIFIC NONHISTONE PROTEIN (FRAGMENT).
IDH3B	IPI00304417 ; IPI00304419 ; IPI00871304	human	Tumor only										3	3	0.340075	0	4	1	0.915936	0.13	No	19.3333	37.4155	Yes	mitochondrion;"GO:0005739,EXP"	ISOCITRATE DEHYDROGENASE 3, BETA SUBUNIT ISOFORM A PRECURSOR.
DDOST	IPI00297084	human	Tumor only										16	6			10	3			No	26	26.9947	Yes	cell;proteincomplex;endoplasmicreticulum;"GO:0005623,IDA"	DOLICHYL-DIPHOSPHOOLIGOSACCHARIDE-PROTEIN GLYCOSYLTRANSFERASE PRECURSOR.
PCBP1	IPI00016610	human	Tumor only										59	12	0.286304	0.19	61	11	0.234465	0.36	No	22	43.0829	No	intracellular;cytoplasm;nucleus;	POLY(RC)-BINDING PROTEIN 1.
SFRS9	IPI00012340 ; IPI00793205	human	Tumor only										9	4	0.37707	0	2	2			No	18.5	37.5872	No	nucleus;	SPLICING FACTOR, ARGININE/SERINE-RICH 9.
TIMM9	IPI00001541	human	Tumor only										6	2	-0.565597	0.21	5	2	-3.07895	0	No	7	39.3854	Yes	cell;proteincomplex;mitochondrion;	MITOCHONDRIAL IMPORT INNER MEMBRANE TRANSLOCASE SUBUNIT TIM9.
TARDBP	IPI00025815 ; IPI00639819 ; IPI00642429	human	Tumor only										13	6	0.514573	0	11	5	0.104697	0	No	23	43.0421	No	nucleus;	TDP43.
ARFGAP2	IPI00297322 ; IPI00871680	human	Tumor only										5	3							No	37	52.7167	No	cell;cytoplasm;Golgiapparatus;	ADP-RIBOSYLATION FACTOR GTPASE-ACTIVATING PROTEIN 2.
ERH	IPI00029631	human	Tumor only										11	1	-0.201634	0.01	8	3	0.0740006	0.02	No	7	65.0933	No	nucleus;cytoplasm;"GO:0005634,IDA;GO:0005737,IDA"	ENHANCER OF RUDIMENTARY HOMOLOG.
	IPI00411329	human	Tumor only										34	4							not annotated	16	45.7327	No		UNCHARACTERIZED PROTEIN ENSP00000222956 (FRAGMENT).
ERGIC1	IPI00003635 ; IPI00022887 ; IPI00874235	human	Tumor only										4	2							No	16.3333	32.7061	Yes	organelle;cytoplasm;cell;endoplasmicreticulum;Golgiapparatus;	ISOFORM 2 OF ENDOPLASMIC RETICULUM-GOLGI INTERMEDIATE COMPARTMENT PROTEIN 1.
CCDC109A	IPI00171573	human	Tumor only														3	3	0.234465	0.02	No	24	44.3573	No	cell;	ISOFORM 1 OF COILED-COIL DOMAIN-CONTAINING PROTEIN 109A.
FBL	IPI00025039	human	Tumor only										17	9	0.152003	0.02	15	5			No	23	35.5399	Yes	intracellular;nucleoplasm;nucleolus;nucleus;	RRNA 2'-O-METHYLTRANSFERASE FIBRILLARIN.
	IPI00100748 ; IPI00442503	human	Tumor only										3	3	-0.333424	0	2	2	0.152003	0	not annotated	14.5	63.4063	No		ISOFORM 1 OF HSP70-BINDING PROTEIN 1.
RPA2	IPI00013939 ; IPI00642145 ; IPI00646500 ; IPI00646957 ; IPI00647667	human	Tumor only										3	2			2	1	0.251539	0.03	No	11.75	38.4098	No	nucleoplasm;proteincomplex;nuclearchromosome;nucleus;"GO:0005654,EXP;GO:0005654,EXP;GO:0005654,EXP;GO:0005654,EXP;GO:0000228,IPI;GO:0043234,IPI" /// nucleoplasm;proteincomplex;nucleus;nuclearchromosome;"GO:0005654,EXP;GO:0005654,EXP;GO:0005654,EXP;GO:0005	ISOFORM 1 OF REPLICATION PROTEIN A 32 KDA SUBUNIT.
PSMA7;PSMA8	IPI00024175 ; IPI00154509 ; IPI00218372 ; IPI00219950 ; IPI00647380 ; IPI00748423 ; IPI00847750	human	Tumor only										14	6	0.136062	0	32	6			No	18.2	43.4355	No	intracellular;cytoplasm;proteincomplex;cytosol;nucleus; /// proteincomplex;cytosol;nucleus;intracellular;cytoplasm; /// proteincomplex;cytosol;intracellular;	ISOFORM 1 OF PROTEASOME SUBUNIT ALPHA TYPE-7.
VSNL1	IPI00216313 ; IPI00893091 ; IPI00894012	human	Tumor only										12	7	0.0291463	0.06	5	3			not annotated	11.3333	24.249	Yes		VISININ-LIKE PROTEIN 1.
RPS20	IPI00012493 ; IPI00791265 ; IPI00791752 ; IPI00794659 ; IPI00795078 ; IPI00796373	human	Tumor only										9	4	-0.124328	0.07	12	4	0.0892673	0.01	No	4.33333	15.3102	Yes	intracellular;ribosome;cytoplasm;cytosol;"GO:0005737,IDA;GO:0005829,EXP;GO:0005840,IDA;GO:0005829,IDA"	40S RIBOSOMAL PROTEIN S20.
ROD1	IPI00159072 ; IPI00384710 ; IPI00470879 ; IPI00640632 ; IPI00646543	human	Tumor only										6	4	0.556393	0.01	2	2			No	22	38.8665	No	nucleus;	ROD1 REGULATOR OF DIFFERENTIATION 1.
TCERG1	IPI00247871 ; IPI00744062	human	Tumor only										4	3	-0.163499	0					No	60	53.9308	No	nucleus;	ISOFORM 1 OF TRANSCRIPTION ELONGATION REGULATOR 1.
CHCHD2;CHCHD9	IPI00007673 ; IPI00401259 ; IPI00872610	human	Tumor only										14	3	0.0740006	0.09	9	3	0.761213	0.01	No	6.33333	60.3133	No	mitochondrion;	COILED-COIL-HELIX-COILED-COIL-HELIX DOMAIN-CONTAINING PROTEIN 2, MITOCHONDRIAL PRECURSOR.
C10orf58	IPI00296190 ; IPI00646289 ; IPI00646889	human	Tumor only										6	2			8	3			Yes	16	28.433	Yes	nucleolus;extracellularregion;cytoplasm;"GO:0005730,IDA;GO:0005737,IDA"	UNCHARACTERIZED PROTEIN C10ORF58 PRECURSOR.
MRPL12	IPI00005537 ; IPI00386010	human	Tumor only										8	3			6	3			No	12.5	37.2919	No	intracellular;ribosome;mitochondrion;"GO:0005739,IDA" /// intracellular;ribosome;	39S RIBOSOMAL PROTEIN L12, MITOCHONDRIAL PRECURSOR.
TM9SF1	IPI00101374 ; IPI00555729	human	Tumor only														2	2	-0.176323	0	No	26	42.9922	No	cell;	TRANSMEMBRANE 9 SUPERFAMILY MEMBER 1 PRECURSOR.
EEF1A2	IPI00014424	human	Tumor only										166	6	0.434403	0.01	95	8	0.184425	0.01	No	27	35.1356	Yes	cytoplasm;proteincomplex;nucleus;	ELONGATION FACTOR 1-ALPHA 2.
PSMD2	IPI00012268	human	Tumor only										44	13	-0.111031	0.07	73	19	-0.201634	0.19	No	58	44.2017	No	intracellular;cytosol;proteincomplex;	26S PROTEASOME NON-ATPASE REGULATORY SUBUNIT 2.
APOE	IPI00021842 ; IPI00878953 ; IPI00879368 ; IPI00879456	human	Tumor only										2	2			4	3			Yes	23.6667	44.8842	No	extracellularspace;extracellularregion;cell;plasmamembrane;cytoplasm;"GO:0005576,EXP;GO:0005576,EXP;GO:0005886,EXP;GO:0005615,IDA;GO:0005615,IDA;GO:0005615,IDA;GO:0005615,IDA" /// extracellularregion;	APOLIPOPROTEIN E PRECURSOR.
SH3BGRL3	IPI00010402 ; IPI00514669 ; IPI00746352	human	Tumor only										25	5	1.39593	0.01	23	3	0.915936	0.01	No	9.66667	36.9239	No	nucleus;cytoplasm;	PUTATIVE UNCHARACTERIZED PROTEIN.
HNRNPH3	IPI00013877 ; IPI00216492 ; IPI00216493	human	Tumor only										41	9			21	5			No	19.5	32.6351	Yes	nucleus;	ISOFORM 1 OF HETEROGENEOUS NUCLEAR RIBONUCLEOPROTEIN H3.
NHP2L1	IPI00026167 ; IPI00893746	human	Tumor only										9	3	0.251539	0.05	14	3	0.136062	0.02	No	10	57.0697	No	nucleolus;nucleus; /// intracellular;	NHP2-LIKE PROTEIN 1.
TPM3	IPI00183968	human	Tumor only										23	7			47	10			No	30	43.6993	No	cytoskeleton;cytoplasm;	TROPOMYOSIN 3 ISOFORM 1.
KIAA0776	IPI00844000	human	Tumor only										3	3			9	5	0.234465	0	not annotated	54	43.2593	No		UPF0555 PROTEIN KIAA0776.
CAPZB	IPI00026185 ; IPI00218782 ; IPI00642256 ; IPI00646047 ; IPI00647677	human	Tumor only										28	7	-0.0285692	0.18	26	8	0.217591	0.14	No	19	48.7015	No	cell;cytoplasm;proteincomplex;cytoskeleton; /// proteincomplex;cytoskeleton; /// cell;proteincomplex;cytoskeleton;cytoplasm; /// cell;proteincomplex;cytoskeleton;	ISOFORM 1 OF F-ACTIN-CAPPING PROTEIN SUBUNIT BETA.
STOM	IPI00219682	human	Tumor only										8	3			10	4	0.304006	0.02	No	20	41.0021	No	cell;plasmamembrane;cytoskeleton;intracellular;organelle;cytoplasm;cytoplasmicmembrane-boundedvesicle;"GO:0005737,IDA;GO:0005856,IDA;GO:0005886,IDA;GO:0043226,IDA;GO:0005622,IDA;GO:0005623,IDA"	ERYTHROCYTE BAND 7 INTEGRAL MEMBRANE PROTEIN.
RPS14	IPI00026271	human	Tumor only										35	4	0.286304	0	48	4	-0.189034	0.04	No	7	48.7821	No	intracellular;ribosome;cytosol;"GO:0005829,EXP;GO:0005840,IDA;GO:0005829,IDA"	40S RIBOSOMAL PROTEIN S14.
RDX	IPI00017367	human	Tumor only										79	7	0.168123	0.08	49	6	0.37707	0.05	No	48	52.2204	No	intracellular;organelle;plasmamembrane;cytoplasm;cell;cytoskeleton;	RADIXIN ISOFORM B.
NCDN	IPI00549543 ; IPI00555661 ; IPI00889000	human	Tumor only										4	3			1	1			No	40	49.4218	No	cell;cytoplasm;	ISOFORM 1 OF NEUROCHONDRIN.
ZC3H4	IPI00187011	human	Tumor only										4	2							not annotated	54	64.1518	No		ZINC FINGER CCCH DOMAIN-CONTAINING PROTEIN 4.
MAPK14	IPI00002857 ; IPI00221141 ; IPI00221142 ; IPI00221143	human	Tumor only										3	3			2	2			No	18	41.2111	No	cytoplasm;nucleoplasm;cytosol;nucleus;"GO:0005654,EXP;GO:0005829,EXP" /// nucleoplasm;cytosol;nucleus;cytoplasm;"GO:0005654,EXP;GO:0005829,EXP"	ISOFORM CSBP2 OF MITOGEN-ACTIVATED PROTEIN KINASE 14.
PSMA6	IPI00029623 ; IPI00867679 ; IPI00888766	human	Tumor only										8	4	-0.422233	0	10	4	-0.111031	0	No	17	29.1709	Yes	proteincomplex;cytosol;nucleus;mitochondrion;intracellular;cytoplasm;"GO:0005739,IDA" /// proteincomplex;intracellular;	PROTEASOME SUBUNIT ALPHA TYPE-6.
NANS	IPI00147874 ; IPI00514469	human	Tumor only										2	2			3	2			No	13.5	29.1031	Yes	cytosol;cytoplasm; /// cytosol;	SIALIC ACID SYNTHASE.
KLF16	IPI00011115	human	Tumor only										1	1			2	2			No	14	74.8171	No	intracellular;nucleus;	KRUEPPEL-LIKE FACTOR 16.
DYNC1H1	IPI00456969	human	Tumor only										127	39	0.862496	0.16	209	57	0.234465	0.15	No	325	42.6731	No	proteincomplex;cytoskeleton;cytoplasm;Golgiapparatus;"GO:0005794,IDA"	CYTOPLASMIC DYNEIN 1 HEAVY CHAIN 1.
LDB3	IPI00165263 ; IPI00294958 ; IPI00294959 ; IPI00514458 ; IPI00552865 ; IPI00654766	human	Tumor only										9	3			2	1			No	24.6667	52.411	No	cell;cytoskeleton;cytoplasm;"GO:0005856,IDA"	ISOFORM 6 OF LIM DOMAIN-BINDING PROTEIN 3.
SERPINB2	IPI00007117 ; IPI00797177 ; IPI00797920	human	Tumor only										2	2			1	1			Yes	13.3333	36.4447	Yes	extracellularregion;cytoplasm;	PLASMINOGEN ACTIVATOR INHIBITOR 2 PRECURSOR.
ARMET	IPI00328748	human	Tumor only										11	5	0.251539	0.05	3	1			Yes	17	59.9363	No	extracellularregion;	PROTEIN ARMET PRECURSOR.
EIF2S2	IPI00021728 ; IPI00176637	human	Tumor only										7	3	0.217591	0.11	12	6	0.120294	0.03	No	21.5	41.5682	No	cytoplasm;proteincomplex;cytosol;"GO:0005829,EXP;GO:0005829,EXP"	EUKARYOTIC TRANSLATION INITIATION FACTOR 2 SUBUNIT 2.
NEFM	IPI00217507 ; IPI00853115 ; IPI00869219	human	Tumor only										3	3			3	1			No	78.3333	68.4334	No	cell;cytoskeleton;cellular_component; /// cytoskeleton; /// cytoskeleton;cellular_component;	NEUROFILAMENT MEDIUM POLYPEPTIDE.
MYH10	IPI00397526 ; IPI00479307 ; IPI00790503	human	Tumor only										108	23	0.234465	0.08	104	17	0.168123	0.11	No	158	51.3504	No	cell;plasmamembrane;proteincomplex;cytoskeleton;cellular_component;cytoplasm;"GO:0005856,IDA;GO:0005737,IDA;GO:0005737,IDA;GO:0005623,IDA;GO:0005623,IDA;GO:0005623,IDA"	ISOFORM 1 OF MYOSIN-10.
CCDC47	IPI00024642 ; IPI00743775	human	Tumor only										4	3	-1.40599	0	4	1			No	23	38.8194	No	cellular_component;cell; /// cell;cellular_component;	ISOFORM 1 OF COILED-COIL DOMAIN-CONTAINING PROTEIN 47 PRECURSOR.
NIT1	IPI00023779 ; IPI00456663 ; IPI00456664 ; IPI00456665 ; IPI00646277	human	Tumor only										1	1			2	2	0.136062	0	No	17.25	43.5138	No	cytoplasm;nucleus;"GO:0005634,IDA;GO:0005634,IDA;GO:0005737,IDA;GO:0005737,IDA" /// nucleus;cytoplasm;"GO:0005634,IDA;GO:0005634,IDA;GO:0005737,IDA;GO:0005737,IDA" /// nucleus;cytoplasm;"GO:0005634,IDA;GO:0005737,IDA;GO:0005634,IDA;GO:0005737,IDA"	ISOFORM 2 OF NITRILASE HOMOLOG 1.
UBQLN1	IPI00099550	human	Tumor only										13	8			10	7			No	14	46.2608	No	proteincomplex;cytosol;nucleus;cytoplasm;"GO:0005737,IDA"	ISOFORM 1 OF UBIQUILIN-1.
PDXK	IPI00013004 ; IPI00216320 ; IPI00418202 ; IPI00791490	human	Tumor only										12	5			11	3			No	18.25	35.4205	No	cytoplasm;"GO:0005737,IDA"	ISOFORM 1 OF PYRIDOXAL KINASE.
NECAP2	IPI00018188 ; IPI00073436 ; IPI00386318	human	Tumor only										6	4			2	1			No	15.3333	26.5872	Yes	intracellular;organelle;cytoplasm;plasmamembrane;proteincomplex;cytoplasmicmembrane-boundedvesicle;"GO:0005622,IDA" /// plasmamembrane;proteincomplex;intracellular;organelle;cytoplasm;cytoplasmicmembrane-boundedvesicle;"GO:0005622,IDA"	ISOFORM 1 OF ADAPTIN EAR-BINDING COAT-ASSOCIATED PROTEIN 2.
SEC24D	IPI00218288 ; IPI00747830	human	Tumor only														3	3	0.535332	0	No	44	48.7916	No	cell;proteincomplex;cytoplasmicmembrane-boundedvesicle;Golgiapparatus; /// cell;proteincomplex;cytoplasm;endoplasmicreticulum;cytoplasmicmembrane-boundedvesicle;Golgiapparatus;	SEC24 RELATED GENE FAMILY, MEMBER D.
AP3B2;AP3B1	IPI00005793 ; IPI00021129	human	Tumor only										1	1			3	3			No	70	50.7297	No	organelle;cytoplasm;cell;proteincomplex;cytoplasmicmembrane-boundedvesicle;Golgiapparatus; /// organelle;cytoplasm;cell;proteincomplex;Golgiapparatus;	AP-3 COMPLEX SUBUNIT BETA-2.
TOMM34	IPI00009946 ; IPI00844363	human	Tumor only										4	3							No	18.5	49.7463	No	cell;cytoplasm;mitochondrion;	MITOCHONDRIAL IMPORT RECEPTOR SUBUNIT TOM34.
PYCR2	IPI00470610 ; IPI00747534	human	Tumor only														2	2	-0.321928	0	not annotated	17	53.1003	No		PYRROLINE-5-CARBOXYLATE REDUCTASE 2.
CD81	IPI00000190 ; IPI00657752	human	Tumor only										6	2	-0.536053	0.06	11	3	0.395929	0.02	No	10	33.1178	Yes	cell;plasmamembrane;"GO:0005886,IDA" /// cell;	CD81 ANTIGEN.
	IPI00398057 ; IPI00887159	human	Tumor only										20	3	0.577767	0.04	25	2	0.251539	0.05	not annotated	19	37.208	Yes		SIMILAR TO QM PROTEIN ISOFORM 6.
SSR4	IPI00019385 ; IPI00646864 ; IPI00647421	human	Tumor only										13	4			11	3			No	7.66667	29.1692	Yes	cell;proteincomplex;endoplasmicreticulum; /// cell;endoplasmicreticulum;	TRANSLOCON-ASSOCIATED PROTEIN SUBUNIT DELTA PRECURSOR.
STIP1	IPI00013894 ; IPI00479946 ; IPI00871856	human	Tumor only										59	20	0.0291463	0.07	59	14	0.184425	0.1	No	51	40.4013	No	cytoplasm;nucleus;Golgiapparatus;	STRESS-INDUCED-PHOSPHOPROTEIN 1.
CARS	IPI00027443 ; IPI00158625 ; IPI00556365	human	Tumor only										10	5	-0.111031	0	6	3			No	51.6667	47.3959	No	cytoplasm;	CYSTEINYL-TRNA SYNTHETASE ISOFORM C.
KLF5	IPI00015934	human	Tumor only										6	3			2	1			No	19	69.1201	No	intracellular;nucleus;	KRUEPPEL-LIKE FACTOR 5.
FGG	IPI00021891 ; IPI00219713 ; IPI00411626 ; IPI00877625 ; IPI00877703 ; IPI00877792	human	Tumor only										13	2			30	3	0.434403	0	Yes	24.3333	27.9824	Yes	extracellularspace;extracellularregion;plasmamembrane;proteincomplex;cytoplasmicmembrane-boundedvesicle;"GO:0005576,EXP;GO:0005576,EXP;GO:0005576,EXP;GO:0005576,EXP;GO:0005886,EXP;GO:0016023,EXP" /// extracellularspace;plasmamembrane;proteincomplex;extrac	ISOFORM GAMMA-B OF FIBRINOGEN GAMMA CHAIN PRECURSOR.
LRRC47	IPI00170935	human	Tumor only										11	9	0.415037	0	8	6	0.943416	0.05	not annotated	34	50.9968	No		LEUCINE-RICH REPEAT-CONTAINING PROTEIN 47.
ATP5B	IPI00303476	human	Tumor only										207	22			286	21			No	34	37.5091	Yes	cell;plasmamembrane;proteincomplex;mitochondrion;intracellular;"GO:0005739,IDA;GO:0043234,IDA;GO:0005739,IDA;GO:0005739,EXP;GO:0005886,IDA;GO:0005623,IDA"	ATP SYNTHASE SUBUNIT BETA, MITOCHONDRIAL PRECURSOR.
PRELP	IPI00020987	human	Tumor only										4	3	0.514573	0	8	3	-0.0840643	0	Yes	24	60.1492	No	extracellularregion;proteinaceousextracellularmatrix;	PROLARGIN PRECURSOR.
NUP43	IPI00171664 ; IPI00742943	human	Tumor only										3	3							No	17	43.9388	No	proteincomplex;nucleus;nuclearenvelope;"GO:0005635,EXP"	48 KDA PROTEIN.
LTB4DH	IPI00292657 ; IPI00642248	human	Tumor only										6	4			5	4			No	16.5	17.4681	Yes	cytoplasm;	NADP-DEPENDENT LEUKOTRIENE B4 12-HYDROXYDEHYDROGENASE.
LMNA	IPI00021405 ; IPI00216953 ; IPI00644087	human	Tumor only										108	27	0.120294	0.06	173	25	0.217591	0	No	50.5	51.9761	No	plasmamembrane;cytoplasm;nucleus;nuclearenvelope;cytoskeleton;"GO:0005737,IDA;GO:0005886,IDA;GO:0005737,IDA;GO:0005737,IDA" /// plasmamembrane;nucleus;nuclearenvelope;cytoskeleton;cytoplasm;"GO:0005737,IDA;GO:0005886,IDA;GO:0005737,IDA;GO:0005737,IDA" ///	ISOFORM A OF LAMIN-A/C.
MRPL11	IPI00007001 ; IPI00333848 ; IPI00377233	human	Tumor only										2	2			3	2			No	16	30.5813	Yes	intracellular;ribosome;mitochondrion; /// intracellular;ribosome; /// mitochondrion;intracellular;ribosome;	39S RIBOSOMAL PROTEIN L11, MITOCHONDRIAL PRECURSOR.
MYL3	IPI00243742	human	Tumor only														8	3	-0.62293	0	No	15	49.8728	No	proteincomplex;cytoskeleton;cytoplasm;"GO:0005737,IDA;GO:0005737,IDA"	MYOSIN LIGHT CHAIN 3.
USP9X	IPI00003964 ; IPI00221012	human	Tumor only														3	3	-0.137504	0	No	151	48.3983	No	cytoplasm;	UBIQUITIN SPECIFIC PROTEASE 9, X-LINKED ISOFORM 4.
ATP5O	IPI00007611	human	Tumor only										13	5	-0.214125	0.01	12	3	-0.0840643	0.04	No	14	34.3362	Yes	cell;plasmamembrane;proteincomplex;mitochondrion;"GO:0005739,IDA;GO:0005739,IDA;GO:0043234,IDA;GO:0005739,IDA;GO:0005886,IDA"	ATP SYNTHASE SUBUNIT O, MITOCHONDRIAL PRECURSOR.
MRPS11	IPI00010244 ; IPI00219350	human	Tumor only										3	2	1.12029	0.03	3	2	0.340075	0	No	12	41.5541	No	intracellular;ribosome;mitochondrion; /// mitochondrion;intracellular;ribosome;	ISOFORM 1 OF 28S RIBOSOMAL PROTEIN S11, MITOCHONDRIAL PRECURSOR.
MLLT4	IPI00023461 ; IPI00216505 ; IPI00398718 ; IPI00479469 ; IPI00552765 ; IPI00759546	human	Tumor only										11	9							No	112.4	56.8083	No	plasmamembrane;	ISOFORM 4 OF AFADIN.
DNPEP	IPI00015856 ; IPI00658215	human	Tumor only														7	2	0.0892673	0	No	27	54.1544	No	cytoplasm;vacuole;	ASPARTYL AMINOPEPTIDASE.
CUTA	IPI00034319 ; IPI00554556 ; IPI00554634	human	Tumor only										8	3	0.556393	0.12	5	1			No	8	52.3571	No	cell;"GO:0005623,IDA"	ISOFORM A OF PROTEIN CUTA PRECURSOR.
ARID1A	IPI00472891 ; IPI00642705 ; IPI00643722	human	Tumor only										2	2	0.888969	0	1	1			No	64.3333	70.3704	No	nucleoplasm;proteincomplex;intracellular; /// nucleoplasm;proteincomplex;nucleus;intracellular;"GO:0005654,IDA;GO:0043234,IDA"	SWI RELATED PROTEIN.
MRPS17	IPI00744772	human	Tumor only										3	2	-0.176323	0.01	2	1	0.0291463	0	No	15	45.7622	No	cell;mitochondrion;intracellular;ribosome;	28S RIBOSOMAL PROTEIN S17, MITOCHONDRIAL PRECURSOR.
MRPL40	IPI00099871 ; IPI00852745	human	Tumor only										2	2							No	14	46.0752	No	nucleus;mitochondrion;ribosome;	39S RIBOSOMAL PROTEIN L40, MITOCHONDRIAL PRECURSOR.
BAT2	IPI00010700 ; IPI00084746 ; IPI00642817 ; IPI00844237 ; IPI00854786 ; IPI00871900 ; IPI00893120 ; IPI00893641 ; IPI00894143	human	Tumor only										8	5			2	2			No	128.8	75.5442	No	cytoplasm;nucleus; /// nucleus;cytoplasm;	ISOFORM 1 OF LARGE PROLINE-RICH PROTEIN BAT2.
LAP3	IPI00419237 ; IPI00789806	human	Tumor only										19	9	0.395929	0.03	8	4	0.321928	0.03	No	35	35.4709	Yes	mitochondrion;intracellular;cytoplasm;	ISOFORM 1 OF CYTOSOL AMINOPEPTIDASE.
MSI2	IPI00073713 ; IPI00167806 ; IPI00455161 ; IPI00792475	human	Tumor only														5	2			No	15.3333	29.8907	Yes	intracellular;cytoplasm;	ISOFORM 1 OF RNA-BINDING PROTEIN MUSASHI HOMOLOG 2.
WASL	IPI00011676	human	Tumor only										4	2	0.268817	0					No	28	68.4943	No	cell;cytoplasm;nucleolus;nucleus;cytoskeleton;"GO:0005730,IDA"	NEURAL WISKOTT-ALDRICH SYNDROME PROTEIN.
KIAA1033	IPI00164930	human	Tumor only										2	2			2	1			not annotated	60	39.6569	Yes		ISOFORM 2 OF UNCHARACTERIZED PROTEIN KIAA1033.
ITPR3	IPI00291607	human	Tumor only														7	6	-0.238787	0.02	No	164	42.8429	No	cell;plasmamembrane;endoplasmicreticulum;	INOSITOL 1,4,5-TRISPHOSPHATE RECEPTOR TYPE 3.
SDHA	IPI00217143 ; IPI00305166 ; IPI00879322	human	Tumor only										26	8	-0.0976108	0.2	34	6	0.136062	0	No	41.5	35.7413	Yes	cell;proteincomplex;mitochondrion;"GO:0005739,IDA;GO:0005739,IDA;GO:0005739,EXP"	57 KDA PROTEIN.
MGMT	IPI00028618	human	Tumor only										4	2	0.535332	0.03					No	11	39.2184	Yes	nucleoplasm;nucleus;"GO:0005654,EXP"	METHYLATED-DNA--PROTEIN-CYSTEINE METHYLTRANSFERASE.
IRGQ	IPI00103925	human	Tumor only										4	3	0.321928	0					not annotated	29	44.8509	No		IMMUNITY-RELATED GTPASE FAMILY Q PROTEIN.
LMO7	IPI00291802 ; IPI00409590 ; IPI00409591 ; IPI00409593	human	Tumor only										5	3							No	125.5	68.6891	No	nucleus;proteincomplex;intracellular;cytoplasm;	ISOFORM 3 OF LIM DOMAIN ONLY PROTEIN 7.
FLAD1	IPI00220299 ; IPI00387088 ; IPI00398214 ; IPI00641224 ; IPI00642864 ; IPI00855871	human	Tumor only										2	2			2	1			No	26.5	44.3818	No	cytosol;"GO:0005829,EXP"	ISOFORM 1 OF FAD SYNTHETASE.
PTGS1	IPI00298267 ; IPI00298268 ; IPI00514766	human	Tumor only										13	7			18	7			No	35.3333	45.2546	No	plasmamembrane;cell;nucleus;cytoplasm;endoplasmicreticulum;Golgiapparatus;"GO:0005794,IDA;GO:0005886,IDA"	CYCLOOXYGENASE 1B3.
NCAPD2	IPI00299524	human	Tumor only										4	4	0.0892673	0	4	3	-0.111031	0	No	98	46.1674	No	nucleus;proteincomplex;chromosome;cytoplasm;"GO:0005694,IDA"	CONDENSIN COMPLEX SUBUNIT 1.
DPH2	IPI00106549 ; IPI00737502	human	Tumor only										2	2							not annotated	17	58.236	No		DIPHTHAMIDE BIOSYNTHESIS PROTEIN 2.
LRPPRC	IPI00783271	human	Tumor only										10	9			50	27	0.415037	0.16	No	114	45.9679	No	cell;nucleus;mitochondrion;nuclearenvelope;cytoskeleton;cytoplasm;nuclearchromosome;"GO:0000228,IDA;GO:0005634,IDA;GO:0005739,IDA;GO:0005856,IDA;GO:0005737,IDA"	LEUCINE-RICH PPR MOTIF-CONTAINING PROTEIN, MITOCHONDRIAL PRECURSOR.
GPX7	IPI00045798	human	Tumor only										3	2			1	1			Yes	14	42.2888	No	extracellularregion;	GLUTATHIONE PEROXIDASE 7 PRECURSOR.
TUBB6	IPI00641706	human	Tumor only										112	14	0.251539	0.02	102	12	0.340075	0.11	not annotated	20	38.1621	Yes		46 KDA PROTEIN.
CALR	IPI00020599	human	Tumor only										98	14	0.217591	0.09	175	13	0.217591	0.05	Yes	26	47.5643	No	intracellular;extracellularspace;organelle;extracellularregion;proteinaceousextracellularmatrix;plasmamembrane;cell;cytoplasm;cytosol;endoplasmicreticulum;"GO:0043226,IDA;GO:0005622,IDA;GO:0005829,IDA"	CALRETICULIN PRECURSOR.
TMEM43	IPI00301280	human	Tumor only										29	12			30	12			No	26	40.6502	No	cell;Golgiapparatus;"GO:0005794,IDA"	TRANSMEMBRANE PROTEIN 43.
	IPI00023549	human	Tumor only										4	3	0.68966	0.01	1	1			No	11	40.3605	No	intracellular;"GO:0005622,IDA"	GALECTIN-RELATED PROTEIN.
NAGK	IPI00296526	human	Tumor only										7	6	0.535332	0	2	2			not annotated	20	33.1971	Yes		N-ACETYL-D-GLUCOSAMINE KINASE.
SERPINE2	IPI00009890	human	Tumor only														4	4			Yes	23	41.3525	No	extracellularregion;	GLIA-DERIVED NEXIN PRECURSOR.
PLTP	IPI00022733 ; IPI00217778 ; IPI00643034	human	Tumor only														3	2			Yes	26	41.5751	No	extracellularregion;	45 KDA PROTEIN.
CDKN2AIP	IPI00020991	human	Tumor only										2	2							No	39	55.194	No	intracellular;nucleus;	CDKN2A INTERACTING PROTEIN.
HEATR1	IPI00024279 ; IPI00641437	human	Tumor only														2	2			No	133.5	42.6828	No	intracellular;nucleus;	HEAT REPEAT-CONTAINING PROTEIN 1.
PMVK	IPI00220648	human	Tumor only										2	2	0.556393	0	2	2			No	14	45.8412	No	cytoplasm;peroxisome;	PHOSPHOMEVALONATE KINASE.
NASP	IPI00179953 ; IPI00219821 ; IPI00332499 ; IPI00514504 ; IPI00639912 ; IPI00646459	human	Tumor only										12	8	0.152003	0	9	4	1.51457	0	No	26	47.7833	No	nucleus;cytoplasm;	ISOFORM 1 OF NUCLEAR AUTOANTIGENIC SPERM PROTEIN.
PXN	IPI00220030 ; IPI00220031 ; IPI00335634 ; IPI00890738	human	Tumor only										4	2	-0.475085	0.03	7	4	-0.214125	0.03	No	28.6667	45.6233	No	plasmamembrane;proteincomplex;cytoskeleton;cytoplasm;"GO:0005886,EXP"	ISOFORM ALPHA OF PAXILLIN.
	IPI00444605	human	Tumor only										17	2			38	2			not annotated	12	57.4608	No		CDNA FLJ45296 FIS, CLONE BRHIP3003340, MODERATELY SIMILAR TO ACTIN, ALPHA SKELETAL MUSCLE 2.
TPT1	IPI00009943 ; IPI00384863 ; IPI00550900	human	Tumor only										14	3			14	3			Yes	8	25.2527	Yes	cytoplasm; /// extracellularspace;proteincomplex;cytoskeleton;endosome;cytoplasm;"GO:0005615,IDA;GO:0005737,IDA;GO:0005768,IDA;GO:0005856,IDA;GO:0043234,IDA"	TUMOR PROTEIN, TRANSLATIONALLY-CONTROLLED 1.
GSTM4	IPI00008770 ; IPI00470739	human	Tumor only										8	2	0.473931	0	7	3	1.2863	0.1	No	17.5	34.2067	Yes	cytoplasm;	ISOFORM 1 OF GLUTATHIONE S-TRANSFERASE MU 4.
HEXB	IPI00012585	human	Tumor only										2	2	0.168123	0	1	1			No	31	43.382	No	cell;cytoplasmicmembrane-boundedvesicle;	BETA-HEXOSAMINIDASE SUBUNIT BETA PRECURSOR.
RCC1;RCC1;SNHG3-RCC1	IPI00001661 ; IPI00747309 ; IPI00787306	human	Tumor only										16	9	-0.163499	0.05	14	8	-0.0285692	0.03	No	26.3333	34.8808	Yes	nucleus;cytoplasm;nuclearchromosome;"GO:0000228,IDA;GO:0000228,IDA"	REGULATOR OF CHROMOSOME CONDENSATION 1 ISOFORM A.
AKR1A1	IPI00220271	human	Tumor only										4	3	0.514573	0	8	4	0.915936	0.01	No	25	49.6855	No	plasmamembrane;cytosol;	ALCOHOL DEHYDROGENASE.
C6orf108	IPI00007926 ; IPI00395835	human	Tumor only										8	3			5	2			No	10.5	42.2615	No	nucleus;	C-MYC-RESPONSIVE PROTEIN RCL.
IPO11	IPI00301107	human	Tumor only										3	3	0.136062	0	5	5			No	51	49.698	No	proteincomplex;nucleus;nuclearenvelope;cytoplasm;	IMPORTIN-11.
CPT2	IPI00012912	human	Tumor only										2	2			2	2			No	44	41.6903	No	cell;mitochondrion;"GO:0005739,EXP"	CARNITINE O-PALMITOYLTRANSFERASE 2, MITOCHONDRIAL PRECURSOR.
SRP9	IPI00642816	human	Tumor only										3	2	0.0144996	0.01	5	2	0.0291463	0.02	No	8	24.3395	Yes	proteincomplex;cytoplasm;endoplasmicreticulum;	SIGNAL RECOGNITION PARTICLE 9 KDA PROTEIN.
IMPDH2	IPI00291510 ; IPI00791628 ; IPI00795859	human	Tumor only										11	7	-0.0285692	0.06	22	8	0.136062	0	No	17	27.9856	Yes	cytosol;"GO:0005829,EXP"	INOSINE-5'-MONOPHOSPHATE DEHYDROGENASE 2.
CANX	IPI00020984	human	Tumor only										71	12	-0.464668	0.17	81	12	-0.263034	0.09	No	28	45.4024	No	cell;cytoplasm;endoplasmicreticulum;cytoplasmicmembrane-boundedvesicle;"GO:0005737,IDA;GO:0005783,IDA;GO:0005783,IDA"	CALNEXIN PRECURSOR.
RPLP0	IPI00008530 ; IPI00556485 ; IPI00791448	human	Tumor only										46	9	0.136062	0.05	61	10	-0.0143553	0.03	No	17.6667	36.2671	Yes	intracellular;ribosome;cytoplasm;cytosol;"GO:0005737,IDA;GO:0005829,EXP" /// intracellular;ribosome;cytoplasm;"GO:0005737,IDA" /// intracellular;ribosome;	60S ACIDIC RIBOSOMAL PROTEIN P0.
APRT	IPI00218693	human	Tumor only										12	4	0.556393	0.09	22	4	0.358454	0.04	No	14	39.2928	Yes	cytosol;cytoplasm;"GO:0005829,EXP"	ADENINE PHOSPHORIBOSYLTRANSFERASE.
HAGH	IPI00003933 ; IPI00745553	human	Tumor only										2	2							not annotated	18.5	26.3504	Yes		HYDROXYACYL GLUTATHIONE HYDROLASE ISOFORM 1.
TSFM	IPI00021016 ; IPI00216260	human	Tumor only										2	2			4	2			No	25.5	46.0549	No	intracellular;nucleus;mitochondrion;"GO:0005634,IDA;GO:0005634,IDA;GO:0005739,IDA" /// nucleus;mitochondrion;intracellular;"GO:0005634,IDA;GO:0005634,IDA;GO:0005739,IDA"	ISOFORM 1 OF ELONGATION FACTOR TS, MITOCHONDRIAL PRECURSOR.
SULT2B1	IPI00008179 ; IPI00328142	human	Tumor only										12	7	0.340075	0	5	4	0.0291463	0	No	23	53.9553	No	cytoplasm;cytosol;"GO:0005829,EXP" /// cytosol;cytoplasm;"GO:0005829,EXP"	ISOFORM 1 OF SULFOTRANSFERASE FAMILY CYTOSOLIC 2B MEMBER 1.
SUCLG1	IPI00759493 ; IPI00872762	human	Tumor only										3	1	0.556393	0.09	6	4	-0.189034	0.05	No	14	41.3038	No	mitochondrion; /// mitochondrion;"GO:0005739,EXP"	SUCCINATE-COA LIGASE, GDP-FORMING, ALPHA SUBUNIT.
HNRNPC	IPI00216592	human	Tumor only										64	10							No	25	42.7744	No	nucleus;"GO:0005634,IDA"	ISOFORM C1 OF HETEROGENEOUS NUCLEAR RIBONUCLEOPROTEINS C1/C2.
COMMD8	IPI00016447 ; IPI00871891	human	Tumor only										3	2			1	1			not annotated	14	56.2312	No		COMM DOMAIN-CONTAINING PROTEIN 8.
PSMD11	IPI00105598	human	Tumor only										27	9			10	6			No	33	41.6931	No	cytosol;proteincomplex;intracellular;	PROTEASOME 26S NON-ATPASE SUBUNIT 11 VARIANT (FRAGMENT).
UBA1	IPI00026119 ; IPI00645078	human	Tumor only										143	22	0.0892673	0.06	200	26	0.286304	0.07	No	44	39.1442	Yes	cytoplasm;nucleus;"GO:0005634,IDA;GO:0005737,IDA" /// nucleus;cytoplasm;"GO:0005634,IDA;GO:0005737,IDA"	UBIQUITIN-LIKE MODIFIER ACTIVATING ENZYME 1.
RARS	IPI00004860 ; IPI00759723	human	Tumor only										26	14	-0.111031	0.07	18	10	-0.189034	0.28	No	44.5	39.6075	No	cytoplasm;cell;nucleus;"GO:0005634,IDA" /// cell;nucleus;cytoplasm;"GO:0005634,IDA"	ISOFORM COMPLEXED OF ARGINYL-TRNA SYNTHETASE, CYTOPLASMIC.
BAK1	IPI00011420 ; IPI00657902 ; IPI00815814	human	Tumor only										2	2			1	1			No	8.5	47.4014	No	cell;mitochondrion;"GO:0005739,IDA;GO:0005739,EXP;GO:0005739,EXP;GO:0005623,IDA" /// cell;mitochondrion;	PUTATIVE UNCHARACTERIZED PROTEIN DKFZP686D0345.
QARS	IPI00026665 ; IPI00796091	human	Tumor only										15	10	0.200913	0.02	10	6	0.286304	0.04	No	55	34.6003	Yes	cytoplasm;	GLUTAMINYL-TRNA SYNTHETASE.
C14orf156	IPI00009922	human	Tumor only										8	5	-0.0285692	0.06	4	3			No	11	62.7973	No	nucleus;mitochondrion;	SRA STEM-LOOP-INTERACTING RNA-BINDING PROTEIN, MITOCHONDRIAL PRECURSOR.
ACAA1	IPI00011522 ; IPI00012828 ; IPI00303933 ; IPI00790196 ; IPI00793428	human	Tumor only										1	1			10	4	1.64386	0.08	No	12	36.7882	No	intracellular;organelle;cytoplasm;peroxisome;"GO:0005737,IDA;GO:0043226,IDA;GO:0005622,IDA"	HOMO SAPIENS CLONE 23623.
TM9SF2	IPI00018415	human	Tumor only										13	8	-0.137504	0.05	5	4	-0.333424	0.06	No	29	42.5167	No	endosome;cell;plasmamembrane;	TRANSMEMBRANE 9 SUPERFAMILY MEMBER 2 PRECURSOR.
ETFB	IPI00004902 ; IPI00556451	human	Tumor only										4	2	0.473931	0.02	8	3	0.104697	0.02	No	20	25.3282	Yes	mitochondrion;	ISOFORM 1 OF ELECTRON TRANSFER FLAVOPROTEIN SUBUNIT BETA.
PDHB	IPI00003925 ; IPI00549885 ; IPI00798351	human	Tumor only										9	6	-0.0565835	0	16	7	0.0588937	0	No	16.6667	39.2044	No	mitochondrion;	ISOFORM 1 OF PYRUVATE DEHYDROGENASE E1 COMPONENT SUBUNIT BETA, MITOCHONDRIAL PRECURSOR.
LONP1	IPI00005158 ; IPI00334291 ; IPI00642982	human	Tumor only										2	2			3	2			No	54.6667	38.6505	Yes	cytoplasm;mitochondrion;"GO:0005737,IDA" /// mitochondrion;	LON PROTEASE HOMOLOG, MITOCHONDRIAL PRECURSOR.
UQCRC2	IPI00305383	human	Tumor only										49	12	-0.0703893	0.07	46	10			No	25	36.045	Yes	cell;nucleus;mitochondrion;"GO:0005634,IDA"	CYTOCHROME B-C1 COMPLEX SUBUNIT 2, MITOCHONDRIAL PRECURSOR.
ATP5F1	IPI00029133 ; IPI00456747	human	Tumor only										10	4			19	6			No	17	35.2862	Yes	cell;proteincomplex;mitochondrion;intracellular;"GO:0043234,IDA;GO:0005739,IDA" /// cell;proteincomplex;mitochondrion;	ATP SYNTHASE SUBUNIT B, MITOCHONDRIAL PRECURSOR.
IL18	IPI00290198	human	Tumor only										3	3	-1.18269	0					Yes	16	36.4327	Yes	extracellularspace;extracellularregion;	INTERLEUKIN-18 PRECURSOR.
MRPS12	IPI00005692	human	Tumor only										2	1	-0.0285692	0.04	4	3	0.104697	0.04	No	11	33.1036	Yes	intracellular;ribosome;mitochondrion;	28S RIBOSOMAL PROTEIN S12, MITOCHONDRIAL PRECURSOR.
VPS4B	IPI00182728	human	Tumor only										8	6	0.251539	0	6	3	0.494109	0	No	29	39.8885	Yes	cell;cytosol;nucleus;endosome;cytoplasm;vacuole;"GO:0005634,IDA;GO:0005737,IDA;GO:0005768,IDA;GO:0005773,IDA;GO:0005829,IDA"	VACUOLAR PROTEIN SORTING-ASSOCIATING PROTEIN 4B.
COL16A1	IPI00400935 ; IPI00641471 ; IPI00854728	human	Tumor only														3	2	1.35845	0	Yes	62.5	35.6723	Yes	proteinaceousextracellularmatrix;extracellularregion;	ISOFORM 1 OF COLLAGEN ALPHA-1(XVI) CHAIN PRECURSOR.
RPA3	IPI00017373 ; IPI00894460	human	Tumor only										5	3	0.304006	0.02	4	2	0.761213	0	No	6.5	32.2736	Yes	cytoplasm;nucleoplasm;proteincomplex;nuclearchromosome;nucleus;"GO:0005654,EXP;GO:0005654,EXP;GO:0005654,EXP;GO:0005654,EXP;GO:0005737,IDA"	REPLICATION PROTEIN A 14 KDA SUBUNIT.
PNPO	IPI00018272 ; IPI00793232	human	Tumor only										7	4			12	2			not annotated	13	41.0161	No		PYRIDOXINE-5'-PHOSPHATE OXIDASE.
LGALS1	IPI00219219	human	Tumor only										90	7	-0.575312	0.2	100	6	-0.238787	0.06	Yes	9	24.1348	Yes	extracellularspace;intracellular;cytoplasm;"GO:0005622,IDA"	GALECTIN-1.
SLTM	IPI00019996 ; IPI00789630 ; IPI00790299 ; IPI00791423 ; IPI00792073 ; IPI00792743	human	Tumor only										2	1			2	2			No	48	31.8843	No	nucleus;	MODULATOR OF ESTROGEN INDUCED TRANSCRIPTION ISOFORM B.
;PGAM1	IPI00453476 ; IPI00549725	human	Tumor only										110	11	-0.137504	0.08	185	11	0.217591	0.03	No	18	45.2764	No	cytosol;	UNCHARACTERIZED PROTEIN ENSP00000348237.
COPE	IPI00399318 ; IPI00465132	human	Tumor only										3	3	0.104697	0	4	3			No	20	44.0623	No	proteincomplex;cytoplasmicmembrane-boundedvesicle;Golgiapparatus; /// cell;proteincomplex;cytosol;organelle;cytoplasm;cytoplasmicmembrane-boundedvesicle;Golgiapparatus;"GO:0005829,EXP;GO:0005829,EXP"	EPSILON SUBUNIT OF COATOMER PROTEIN COMPLEX ISOFORM B.
HDLBP	IPI00022228	human	Tumor only										10	9	0.577767	0	14	6			No	104	44.9672	No	plasmamembrane;cytoplasm;nucleus;	VIGILIN.
GM2A	IPI00018236	human	Tumor only										4	3	0.152003	0.12	12	2	0.454032	0	No	11	42.2855	No	lysosome;mitochondrion;	GANGLIOSIDE GM2 ACTIVATOR PRECURSOR.
CNN2	IPI00015262 ; IPI00398735	human	Tumor only										16	9	0.862496	0.06	12	2			No	18	44.9288	No	plasmamembrane;cytoskeleton;	CALPONIN-2.
NUCB1	IPI00295542 ; IPI00892540 ; IPI00892657 ; IPI00892782 ; IPI00893068 ; IPI00893190	human	Tumor only										9	6			17	7			Yes	21	40.3329	No	extracellularspace;cell;cytoskeleton;cytoplasm;Golgiapparatus;"GO:0005737,IDA;GO:0005856,IDA"	NUCLEOBINDIN-1 PRECURSOR.
TWF2	IPI00550917	human	Tumor only														4	4	0.251539	0	No	29	50.5819	No	cytoskeleton;intracellular;cytoplasm;	TWINFILIN-2.
UNC84A	IPI00783943 ; IPI00844303	human	Tumor only										10	4			16	9	-1.24489	0.09	No	52	47.0921	No	cell;nucleus;nuclearenvelope;cytoplasm;	ISOFORM 1 OF PROTEIN UNC-84 HOMOLOG A.
FMOD	IPI00000860 ; IPI00292732	human	Tumor only										5	3			3	2			Yes	14.5	52.0106	No	extracellularregion;proteinaceousextracellularmatrix;	FIBROMODULIN PRECURSOR.
PHPT1	IPI00299977 ; IPI00513775	human	Tumor only										14	3	0.556393	0	6	2			No	10	28.2464	Yes	cytosol;cytoplasm;	14 KDA PHOSPHOHISTIDINE PHOSPHATASE.
NUDT21	IPI00552186 ; IPI00646917	human	Tumor only										7	4			4	2			No	13.5	34.4143	Yes	nucleoplasm;nucleus;microtubuleorganizingcenter;"GO:0005815,IDA;GO:0005654,IDA"	PUTATIVE UNCHARACTERIZED PROTEIN DKFZP313O211.
HADH	IPI00294398 ; IPI00298406	human	Tumor only										12	4			16	6			No	24	23.9236	Yes	mitochondrion;cytoplasm;"GO:0005737,IDA;GO:0005739,EXP"	ISOFORM 1 OF HYDROXYACYL-COENZYME A DEHYDROGENASE, MITOCHONDRIAL PRECURSOR.
PARVA	IPI00018963 ; IPI00386908	human	Tumor only										3	2			2	2			No	18.5	46.186	No	cell;plasmamembrane;cytoplasm;nucleus;cytoskeleton; /// cell;plasmamembrane;nucleus;cytoskeleton;cytoplasm;	ISOFORM 1 OF ALPHA-PARVIN.
CA12	IPI00012895 ; IPI00221392	human	Tumor only										6	3	-0.765535	0.39	1	1			No	14	50.628	No	cell;plasmamembrane;cytoplasm;"GO:0005737,IDA;GO:0005737,IDA;GO:0005886,IDA;GO:0005886,IDA"	ISOFORM 1 OF CARBONIC ANHYDRASE 12 PRECURSOR.
COPG	IPI00783982	human	Tumor only										19	7	0.120294	0.05	23	11	-0.238787	0.18	No	59	48.8216	No	cell;proteincomplex;cytosol;organelle;cytoplasm;cytoplasmicmembrane-boundedvesicle;Golgiapparatus;"GO:0005829,EXP;GO:0005829,EXP"	COATOMER SUBUNIT GAMMA.
SLC9A3R1	IPI00003527 ; IPI00794755	human	Tumor only										5	5			5	3			No	24.5	44.2218	No	plasmamembrane;cell;cytoskeleton;	EZRIN-RADIXIN-MOESIN-BINDING PHOSPHOPROTEIN 50.
ILF2	IPI00005198 ; IPI00641665 ; IPI00643578 ; IPI00872107	human	Tumor only										20	6			21	10	0.340075	0.06	No	12.3333	42.7722	No	nucleolus;nucleus;"GO:0005634,IDA;GO:0005730,IDA"	INTERLEUKIN ENHANCER-BINDING FACTOR 2.
OSTF1	IPI00414836	human	Tumor only										10	5	0.321928	0	13	4			No	14	37.0327	Yes	intracellular;cytoplasm;	OSTEOCLAST-STIMULATING FACTOR 1.
ACTR2	IPI00005159	human	Tumor only										36	9	0.473931	0.18	43	10	0.37707	0.07	No	25	35.9906	Yes	cell;cytoplasm;proteincomplex;cytoskeleton;	ACTIN-RELATED PROTEIN 2.
GSPT2	IPI00642097	human	Tumor only										9	4			4	2	-0.495695	0	No	37	42.982	No	cytoplasm;	EUKARYOTIC PEPTIDE CHAIN RELEASE FACTOR GTP-BINDING SUBUNIT ERF3B.
POFUT1	IPI00058192 ; IPI00218176	human	Tumor only										1	1			4	2	0.217591	0	No	15	40.5789	No	cell;endoplasmicreticulum;"GO:0005623,IDA;GO:0005623,IDA"	ISOFORM 1 OF GDP-FUCOSE PROTEIN O-FUCOSYLTRANSFERASE 1 PRECURSOR.
VDAC3	IPI00031804 ; IPI00294779 ; IPI00871813	human	Tumor only										5	3	-0.536053	0.01	9	3	-0.0976108	0	No	19	9.68516	Yes	cell;mitochondrion;	ISOFORM 1 OF VOLTAGE-DEPENDENT ANION-SELECTIVE CHANNEL PROTEIN 3.
ITGA2	IPI00013744	human	Tumor only										3	2			14	6	-0.536053	0.44	No	58	33.9968	Yes	cell;plasmamembrane;proteincomplex;"GO:0005886,EXP"	INTEGRIN ALPHA-2 PRECURSOR.
HP1BP3	IPI00640417	human	Tumor only										4	2							No	20	57.8662	No	nucleus;chromosome;	HETEROCHROMATIN PROTEIN 1, BINDING PROTEIN 3.
RNASE7	IPI00000270	human	Tumor only										28	6	0.666576	0.02	15	3	0.37707	0.03	Yes	10	55.643	No	extracellularregion;	RIBONUCLEASE 7 PRECURSOR.
ACADVL	IPI00028031 ; IPI00178744	human	Tumor only										30	11	0.104697	0.05	29	10	0.286304	0	No	49.5	37.7987	Yes	cell;mitochondrion;	ISOFORM 1 OF VERY LONG-CHAIN SPECIFIC ACYL-COA DEHYDROGENASE, MITOCHONDRIAL PRECURSOR.
	IPI00027987	human	Tumor only										7	4	-0.678072	0.16					No	4	41.1889	No	intracellular;cellular_component;	CASPASE-1 INHIBITOR ICEBERG.
FER1L3	IPI00216269	human	Tumor only										43	18	-0.0976108	0.08	52	24	0.0439433	0.05	No	144	41.1881	No	cell;plasmamembrane;nucleus;nuclearenvelope;	ISOFORM 3 OF MYOFERLIN.
FAM83A	IPI00328846	human	Tumor only										2	2							not annotated	27	53.0793	No		ISOFORM 1 OF PROTEIN FAM83A.
M6PRBP1	IPI00303882	human	Tumor only										42	15	0.395929	0.07	31	13	0.340075	0.08	No	32	46.4624	No	lipidparticle;cell;organelle;endosome;cytoplasm;Golgiapparatus;	ISOFORM B OF MANNOSE-6-PHOSPHATE RECEPTOR-BINDING PROTEIN 1.
LYPLA2	IPI00027032 ; IPI00513881 ; IPI00646978	human	Tumor only										13	3	0.494109	0.05	9	4	0.184425	0.05	No	13	43.5238	No	cytoplasm;	ACYL-PROTEIN THIOESTERASE 2.
DGAT1	IPI00015799	human	Tumor only														2	2			No	18	43.5295	No	cell;cytosol;endoplasmicreticulum;"GO:0005829,EXP"	DIACYLGLYCEROL O-ACYLTRANSFERASE 1.
RNASE4	IPI00029699	human	Tumor only										6	2	-1.07724	0	7	1			Yes	13	53.3871	No	extracellularregion;	RIBONUCLEASE 4 PRECURSOR.
ACTN4	IPI00013808	human	Tumor only										345	42	-0.214125	0.06	311	40	0.0291463	0.1	No	65	40.9002	No	cell;cytoplasm;nucleolus;proteincomplex;nucleus;cytoskeleton;"GO:0005634,IDA;GO:0005730,IDA;GO:0005737,IDA;GO:0043234,IDA;GO:0005737,IDA"	ALPHA-ACTININ-4.
AKR7A2	IPI00305978	human	Tumor only										5	5			2	2			No	21	52.7989	No	Golgiapparatus;	AFLATOXIN B1 ALDEHYDE REDUCTASE MEMBER 2.
PSMB7	IPI00003217	human	Tumor only										4	3	-0.201634	0.02					No	13	24.4657	Yes	intracellular;cytoplasm;proteincomplex;cytosol;nucleus;	PROTEASOME SUBUNIT BETA TYPE-7 PRECURSOR.
SCP2	IPI00026105 ; IPI00479510 ; IPI00479934	human	Tumor only										10	3	0.473931	0.02	22	3	0.761213	0.01	No	23	29.4843	Yes	cytoplasm;mitochondrion;peroxisome; /// mitochondrion;cytoplasm;peroxisome;	ISOFORM SCPX OF NON-SPECIFIC LIPID-TRANSFER PROTEIN.
ERAP1	IPI00165949 ; IPI00477831	human	Tumor only										4	4	0.0439433	0	7	4			Yes	58.5	40.4664	No	cell;cytosol;intracellular;organelle;extracellularregion;cytoplasm;endoplasmicreticulum;"GO:0005576,IDA"	ISOFORM 2 OF ENDOPLASMIC RETICULUM AMINOPEPTIDASE 1.
PDXP;SH3BP1;PDXP;SH3BP1	IPI00444788 ; IPI00445123 ; IPI00456744 ; IPI00456745 ; IPI00872606	human	Tumor only										10	5	-0.286881	0	1	1			No	36.6667	59.1901	No	intracellular;cytoplasm;	CDNA FLJ44925 FIS, CLONE BRAMY3014613, HIGHLY SIMILAR TO HOMO SAPIENS SH3-DOMAIN BINDING PROTEIN 1.
NUDT9	IPI00031558 ; IPI00415040	human	Tumor only										8	6			1	1			No	27	41.0949	No	mitochondrion;intracellular;	ISOFORM 1 OF ADP-RIBOSE PYROPHOSPHATASE, MITOCHONDRIAL PRECURSOR.
CHCHD3	IPI00015833	human	Tumor only										1	1	-0.111031	0	8	4	0.217591	0.08	No	20	59.1674	No	mitochondrion;	COILED-COIL-HELIX-COILED-COIL-HELIX DOMAIN-CONTAINING PROTEIN 3, MITOCHONDRIAL PRECURSOR.
	IPI00374260 ; IPI00887928	human	Tumor only										28	4	0.643856	0.03	32	4	0.251539	0.05	not annotated	19	44.9023	No		SIMILAR TO QM PROTEIN ISOFORM 1.
CDK6	IPI00023529	human	Tumor only										1	1			3	3			No	26	35.1614	Yes	intracellular;cytoplasm;cell;nucleus;proteincomplex;"GO:0005622,IDA;GO:0043234,IDA;GO:0005623,IDA;GO:0005634,IDA;GO:0005634,IDA;GO:0005737,IDA;GO:0005737,IDA"	CELL DIVISION PROTEIN KINASE 6.
AGRN	IPI00374563	human	Tumor only										4	2	0.0439433	0	18	7	0.599462	0.07	Yes	115	49.6626	No	extracellularspace;proteinaceousextracellularmatrix;cell;extracellularregion;cytoplasm;"GO:0005578,IDA"	AGRIN PRECURSOR.
IARS2	IPI00017283 ; IPI00181469	human	Tumor only										5	2	-0.0840643	0	7	6	1.39593	0.1	No	53	45.2165	No	cytoplasm;mitochondrion;	ISOLEUCYL-TRNA SYNTHETASE, MITOCHONDRIAL PRECURSOR.
;RPS28	IPI00556589 ; IPI00719622 ; IPI00787692 ; IPI00887241	human	Tumor only										14	3	0.454032	0.04	11	4	0.454032	0	No	4.66667	37.9333	No	cytosol;intracellular;ribosome;"GO:0005829,EXP;GO:0005840,IDA;GO:0005829,IDA" /// intracellular;ribosome;	4 KDA PROTEIN.
TUBA4A	IPI00335314	human	Tumor only										95	6	0.395929	0.05					No	13	51.5447	No	proteincomplex;cytoskeleton;	UNCHARACTERIZED PROTEIN TUBA4A.
ACP1	IPI00218847 ; IPI00892543	human	Tumor only										15	4	0.120294	0.06	6	2	0.200913	0.02	No	9.5	49.6753	No	cell;cytoplasm;	ISOFORM 2 OF LOW MOLECULAR WEIGHT PHOSPHOTYROSINE PROTEIN PHOSPHATASE.
CDC42BPB	IPI00477763	human	Tumor only										2	2			1	1			No	107	53.5836	No	cell;plasmamembrane;cytoskeleton;cytoplasm;	SERINE/THREONINE-PROTEIN KINASE MRCK BETA.
SEC23B	IPI00017376 ; IPI00642931	human	Tumor only										9	4	0.340075	0	15	6	0.286304	0.14	No	31.5	48.0849	No	organelle;cytoplasm;cell;proteincomplex;endoplasmicreticulum;cytoplasmicmembrane-boundedvesicle;Golgiapparatus; /// proteincomplex;cytoplasm;cytoplasmicmembrane-boundedvesicle;Golgiapparatus;	PROTEIN TRANSPORT PROTEIN SEC23B.
TBC1D15	IPI00154645 ; IPI00793999 ; IPI00794613	human	Tumor only														2	2			No	35.6667	48.5292	No	mitochondrion;intracellular;	ISOFORM 1 OF TBC1 DOMAIN FAMILY MEMBER 15.
ZMPSTE24	IPI00027180	human	Tumor only										11	6			10	6			No	22	45.9543	No	cell;cytoplasm;endoplasmicreticulum;Golgiapparatus;"GO:0005737,IDA"	CAAX PRENYL PROTEASE 1 HOMOLOG.
MRPL2	IPI00411816	human	Tumor only										2	2	-0.0143553	0	3	1			No	22	49.9279	No	mitochondrion;intracellular;ribosome;cytoplasm;"GO:0005737,IDA"	39S RIBOSOMAL PROTEIN L2, MITOCHONDRIAL PRECURSOR.
CAPN1	IPI00011285	human	Tumor only										28	12	-0.0143553	0.03	28	12	0.621488	0.03	No	46	33.937	Yes	intracellular;plasmamembrane;cytoplasm;	CALPAIN-1 CATALYTIC SUBUNIT.
GBAS	IPI00016077	human	Tumor only										17	6	-0.0703893	0.09	18	5	0.473931	0	No	22	50.6965	No	plasmamembrane;cell;mitochondrion;	PROTEIN NIPSNAP HOMOLOG 2.
RANGAP1	IPI00294879 ; IPI00877824 ; IPI00879993	human	Tumor only										17	12	1.64386	0.11	17	9	-0.111031	0.02	No	16.3333	27.0436	Yes	cell;nucleus;proteincomplex;nuclearenvelope;chromosome;cytoplasm; /// cytoplasm;	RAN GTPASE-ACTIVATING PROTEIN 1.
ETHE1	IPI00003766	human	Tumor only										4	3	0.136062	0	4	3	0.200913	0	No	19	49.0126	No	cytoplasm;nucleus;mitochondrion;	ETHE1 PROTEIN, MITOCHONDRIAL PRECURSOR.
NAT10	IPI00300127	human	Tumor only										5	2			7	6	-0.367371	0	No	63	45.9441	No	nucleus;	N-ACETYLTRANSFERASE 10.
CKAP5	IPI00028275 ; IPI00472887	human	Tumor only										2	2			5	5			No	142	41.0645	No	proteincomplex;cytoskeleton;microtubuleorganizingcenter;"GO:0005815,IDA;GO:0043234,IDA;GO:0005815,IDA"	CYTOSKELETON-ASSOCIATED PROTEIN 5.
PPP1R7	IPI00033600 ; IPI00395771 ; IPI00759705 ; IPI00759816 ; IPI00893539 ; IPI00893764 ; IPI00893774 ; IPI00893943 ; IPI00894184	human	Tumor only										3	2	0.168123	0	5	1			No	20.625	50.6217	No	nucleus;cytoplasm;	ISOFORM 1 OF PROTEIN PHOSPHATASE 1 REGULATORY SUBUNIT 7.
C20orf4	IPI00166013 ; IPI00791333	human	Tumor only										2	2			3	2			not annotated	26.5	43.2264	No		UNCHARACTERIZED PROTEIN C20ORF4.
MRPS23	IPI00032881	human	Tumor only										2	2							No	17	40.3695	No	mitochondrion;ribosome;	MITOCHONDRIAL RIBOSOMAL PROTEIN S23.
RPL3	IPI00550021 ; IPI00651660	human	Tumor only										54	7	-0.137504	0.09	45	9	-0.0976108	0.17	No	27.5	30.1427	Yes	nucleolus;cytosol;intracellular;ribosome;cytoplasm;"GO:0005829,EXP" /// intracellular;ribosome;	60S RIBOSOMAL PROTEIN L3.
POLDIP3	IPI00429180 ; IPI00440688 ; IPI00877685 ; IPI00878135	human	Tumor only										11	6	0.556393	0.01					No	22	44.114	No	nucleus;	POLYMERASE DELTA INTERACTING PROTEIN 46.
TBC1D2	IPI00097495 ; IPI00478568 ; IPI00646637 ; IPI00647041	human	Tumor only										2	2			1	1			No	49.75	49.6915	No	intracellular;	TBC1 DOMAIN FAMILY MEMBER 2A.
DFFA	IPI00010882 ; IPI00604566	human	Tumor only										4	4			3	2			No	19	58.7381	No	intracellular;cytoplasm;nucleoplasm;cytosol;nucleus;"GO:0005634,IDA;GO:0005654,EXP" /// nucleoplasm;cytosol;nucleus;intracellular;cytoplasm;"GO:0005634,IDA;GO:0005654,EXP"	ISOFORM DFF45 OF DNA FRAGMENTATION FACTOR SUBUNIT ALPHA (FRAGMENT).
	IPI00398958	human	Tumor only										16	5	-1.11103	0.77	49	7	-1.51096	1.07	not annotated	15	36.7125	Yes		SIMILAR TO 40S RIBOSOMAL PROTEIN SA (P40) (34/67 KDA LAMININ RECEPTOR) (COLON CARCINOMA LAMININ-BINDING PROTEIN) (NEM/1CHD4) (MULTIDRUG RESISTANCE-ASSOCIATED PROTEIN MGR1-AG) ISOFORM 1.
ITPA	IPI00018783 ; IPI00375446 ; IPI00797679	human	Tumor only										5	4	0.0892673	0	1	1			No	12	30.4144	Yes	cytoplasm;	INOSINE TRIPHOSPHATE PYROPHOSPHATASE.
EIF2AK2	IPI00019463 ; IPI00385404 ; IPI00807398	human	Tumor only										13	4							No	27.6667	42.6485	No	intracellular;	INTERFERON-INDUCED, DOUBLE-STRANDED RNA-ACTIVATED PROTEIN KINASE.
TXNDC10	IPI00064193 ; IPI00555585 ; IPI00644753 ; IPI00645851	human	Tumor only										2	2			1	1			No	15.75	24.1936	Yes	cell;endoplasmicreticulum;	ISOFORM 1 OF PROTEIN DISULFIDE-ISOMERASE TXNDC10 PRECURSOR.
SERPINB13	IPI00006560 ; IPI00220494 ; IPI00792225	human	Tumor only										4	4			2	2			No	23.5	35.2734	Yes	cellular_component;cytoplasm;	ISOFORM 1 OF SERPIN B13.
RPA1	IPI00020127	human	Tumor only														2	2			No	35	35.8333	Yes	cytoplasm;nucleoplasm;proteincomplex;nuclearchromosome;nucleus;cytoskeleton;chromosome;"GO:0005654,EXP;GO:0005654,EXP;GO:0005654,EXP;GO:0005654,EXP;GO:0000228,IPI;GO:0043234,IPI;GO:0005737,IDA;GO:0005856,IDA;GO:0005654,IDA"	REPLICATION PROTEIN A 70 KDA DNA-BINDING SUBUNIT.
BCAP31	IPI00218200 ; IPI00639976 ; IPI00640444 ; IPI00641554 ; IPI00642984 ; IPI00646739	human	Tumor only										13	4			24	5			No	11.5	35.241	Yes	plasmamembrane;organelle;cytoplasm;endoplasmicreticulum;Golgiapparatus;"GO:0005886,IDA"	B-CELL RECEPTOR-ASSOCIATED PROTEIN 31.
ATIC	IPI00289499	human	Tumor only										37	19	0.0892673	0.06	42	12	0.286304	0.05	not annotated	42	38.5714	Yes		BIFUNCTIONAL PURINE BIOSYNTHESIS PROTEIN PURH.
	IPI00157456	human	Tumor only										9	1	-0.321928	0.27	13	2	-0.0703893	0.03	not annotated	11	24.0601	Yes		SIMILAR TO 40S RIBOSOMAL PROTEIN S12.
ICT1	IPI00029114 ; IPI00791262	human	Tumor only														2	2			No	17	54.1733	No	cellular_component;	IMMATURE COLON CARCINOMA TRANSCRIPT 1 PROTEIN PRECURSOR.
VAMP8	IPI00030911	human	Tumor only										3	2			4	1			No	7	38.386	Yes	cell;endosome;	VESICLE-ASSOCIATED MEMBRANE PROTEIN 8.
MRPS31	IPI00294242	human	Tumor only										2	2			3	2			No	32	62.218	No	mitochondrion;ribosome;	28S RIBOSOMAL PROTEIN S31, MITOCHONDRIAL PRECURSOR.
CD3EAP	IPI00012788 ; IPI00645816	human	Tumor only										4	3	0.200913	0.03					No	17	68.8767	No	nucleolus;nucleoplasm;nucleus;proteincomplex;	ISOFORM 2 OF DNA-DIRECTED RNA POLYMERASE I SUBUNIT RPA34.
ARL6IP5	IPI00007426	human	Tumor only										8	2			4	1			No	6	37.7824	Yes	cell;cytoplasm;endoplasmicreticulum;	PRA1 FAMILY PROTEIN 3.
SSBP1	IPI00029744	human	Tumor only										18	5			25	4			No	13	47.4372	No	mitochondrion;	SINGLE-STRANDED DNA-BINDING PROTEIN, MITOCHONDRIAL PRECURSOR.
PAFAH1B3	IPI00014808	human	Tumor only										3	2	0	0	1	1			No	17	34.3766	Yes	cytoplasm;	PLATELET-ACTIVATING FACTOR ACETYLHYDROLASE IB SUBUNIT GAMMA.
CAPG	IPI00027341 ; IPI00848090	human	Tumor only										39	11	0.268817	0.04	20	7	0.434403	0	No	17.5	44.1917	No	proteincomplex;nucleus;cytoskeleton;cytoplasm;cytoplasmicmembrane-boundedvesicle;	MACROPHAGE-CAPPING PROTEIN.
HSP90AB1	IPI00414676	human	Tumor only										345	25	0.0892673	0.15	410	30	-0.137504	0.09	No	48	42.1484	No	cytoplasm;cytoplasmicmembrane-boundedvesicle;	HEAT SHOCK PROTEIN HSP 90-BETA.
EIF2S1	IPI00219678	human	Tumor only										9	4			16	3			No	23	53.0936	No	proteincomplex;cytosol;nucleus;intracellular;cytoplasm;"GO:0005829,EXP;GO:0005829,EXP;GO:0005737,IDA;GO:0043234,IDA"	EUKARYOTIC TRANSLATION INITIATION FACTOR 2 SUBUNIT 1.
LMNB1	IPI00217975 ; IPI00790831	human	Tumor only										23	8			12	5			No	40	45.108	No	cell;nucleus;nuclearenvelope;cytoskeleton; /// nucleus;nuclearenvelope;cytoskeleton;	LAMIN-B1.
TMPO	IPI00030131 ; IPI00181409 ; IPI00830089 ; IPI00873716	human	Tumor only										29	11	0.184425	0.02	17	7	0.321928	0.04	No	21.75	40.1841	No	cell;nucleus;nuclearenvelope;chromosome; /// nuclearenvelope;	ISOFORM BETA OF LAMINA-ASSOCIATED POLYPEPTIDE 2, ISOFORMS BETA/GAMMA.
	IPI00398135	human	Tumor only										5	3	1.05889	0.04	13	3	-0.0976108	0.13	not annotated	13	39.7831	Yes		HYPOTHETICAL PROTEIN LOC389435.
CALML3	IPI00216984	human	Tumor only										31	7	0.340075	0.03	26	6	0.152003	0.02	not annotated	12	30.5819	Yes		CALMODULIN-LIKE PROTEIN 3.
CTSC	IPI00022810	human	Tumor only										12	6	0.577767	0.02	9	4	0.514573	0.03	No	26	34.9134	Yes	lysosome;	DIPEPTIDYL-PEPTIDASE 1 PRECURSOR.
CSPG4	IPI00019157	human	Tumor only										24	14	-0.62293	0	67	23	0.321928	0	No	98	44.7157	No	cell;plasmamembrane;proteincomplex;	CHONDROITIN SULFATE PROTEOGLYCAN 4 PRECURSOR.
CLNS1A	IPI00004795	human	Tumor only										8	3			4	1			No	12	49.9688	No	plasmamembrane;cytoplasm;nucleus;cytoskeleton;	METHYLOSOME SUBUNIT PICLN.
BAT2D1	IPI00083708 ; IPI00148247 ; IPI00739117 ; IPI00852708	human	Tumor only										6	5			4	4			not annotated	119.75	63.7874	No		BAT2-ISO.
PDLIM1	IPI00010414	human	Tumor only										59	12	-0.137504	0.14	44	12	0.862496	0.11	No	22	53.2073	No	cytoplasm;nucleoplasm;proteincomplex;cytoskeleton;	PDZ AND LIM DOMAIN PROTEIN 1.
RG9MTD1	IPI00099996	human	Tumor only										4	4			1	1			No	31	53.0151	No	mitochondrion;	RNA (GUANINE-9-) METHYLTRANSFERASE DOMAIN CONTAINING 1.
EPS15L1	IPI00163849 ; IPI00645613 ; IPI00646339 ; IPI00647324 ; IPI00871411	human	Tumor only										3	3							No	49	45.1403	No	plasmamembrane;nucleus;"GO:0005886,EXP;GO:0005886,EXP;GO:0005886,EXP"	EPIDERMAL GROWTH FACTOR RECEPTOR SUBSTRATE 15-LIKE 1.
MRPL41	IPI00217553	human	Tumor only										1	1			3	2			No	7	28.273	Yes	mitochondrion;ribosome;"GO:0005840,IDA;GO:0005739,IDA"	39S RIBOSOMAL PROTEIN L41, MITOCHONDRIAL PRECURSOR.
PYGM	IPI00218130	human	Tumor only										26	9	0.473931	0.08	32	7	-0.475085	0.08	not annotated	63	37.048	Yes		GLYCOGEN PHOSPHORYLASE, MUSCLE FORM.
NUP214	IPI00183294 ; IPI00465191 ; IPI00646361	human	Tumor only										8	3			1	1			No	69.3333	57.0266	No	cytosol;proteincomplex;nucleus;nuclearenvelope;"GO:0005829,EXP"	NUCLEAR PORE COMPLEX PROTEIN NUP214.
GALK1	IPI00019383 ; IPI00442827	human	Tumor only										3	3	0.321928	0	6	4	0.666576	0.01	No	21	51.3763	No	cytoplasm;cytosol;Golgiapparatus;"GO:0005737,IDA;GO:0005794,IDA;GO:0005829,EXP"	GALACTOKINASE.
BSG	IPI00019906 ; IPI00218019 ; IPI00394876 ; IPI00394877	human	Tumor only										9	3	-0.286881	0.03	11	3			No	14.3333	41.0166	No	cell;plasmamembrane;cytoplasmicmembrane-boundedvesicle;Golgiapparatus;"GO:0005794,EXP;GO:0005794,EXP;GO:0005886,EXP;GO:0005886,EXP" /// cell;	ISOFORM 2 OF BASIGIN PRECURSOR.
ZC3HAV1	IPI00332936 ; IPI00410067 ; IPI00410069 ; IPI00410070 ; IPI00410071	human	Tumor only										4	2			2	1			No	40.2	44.2774	No	nucleus;cytoplasm;	ISOFORM 2 OF ZINC FINGER CCCH-TYPE ANTIVIRAL PROTEIN 1.
RPE	IPI00335280 ; IPI00373788	human	Tumor only										3	3	0.234465	0	3	1			No	10	36.825	Yes	cytosol;"GO:0005829,EXP"	ISOFORM 1 OF RIBULOSE-PHOSPHATE 3-EPIMERASE.
SDF4	IPI00009794 ; IPI00106646 ; IPI00384644 ; IPI00514755	human	Tumor only										3	2			1	1			No	19	41.206	No	Golgiapparatus;	STROMAL CELL DERIVED FACTOR 4 PRECURSOR.
EBNA1BP2	IPI00745955	human	Tumor only										4	2			1	1			No	26	48.3507	No	cell;nucleus;	EBNA1 BINDING PROTEIN 2.
GLRX5	IPI00333763	human	Tumor only										4	1	0.152003	0	2	2	0.136062	0	No	9	38.4624	Yes	mitochondrion;	GLUTAREDOXIN-RELATED PROTEIN 5.
LASS2	IPI00305304 ; IPI00472101 ; IPI00641012 ; IPI00641435 ; IPI00642091 ; IPI00642378	human	Tumor only										3	2			1	1			No	12.8333	49.4313	No	cell;nucleus;nuclearenvelope;endoplasmicreticulum; /// cell; /// cell;nucleus; /// nucleus;	LAG1 LONGEVITY ASSURANCE HOMOLOG 2.
HDHD1A	IPI00302436	human	Tumor only										4	3	-0.748461	0	2	1			No	12	47.1215	No	cellular_component;	HALOACID DEHALOGENASE-LIKE HYDROLASE DOMAIN CONTAINING PROTEIN.
RPAP3	IPI00002408 ; IPI00448515	human	Tumor only										2	2							not annotated	49.5	46.4773	No		ISOFORM 1 OF RNA POLYMERASE II-ASSOCIATED PROTEIN 3.
CTNND1	IPI00182469 ; IPI00182540 ; IPI00219725 ; IPI00219733 ; IPI00219734 ; IPI00219875 ; IPI00848265	human	Tumor only										37	13	0.713119	0.05	29	8	0.473931	0.1	No	61	42.6393	No	plasmamembrane;cell;nucleus;cytoplasm;	ISOFORM 1AB OF CATENIN DELTA-1.
CETN2	IPI00215928	human	Tumor only										2	2			2	2			No	12	46.2779	No	intracellular;microtubuleorganizingcenter;"GO:0005622,IDA;GO:0005815,IDA"	CENTRIN-2.
MIA3	IPI00455473 ; IPI00655578 ; IPI00736183 ; IPI00739902 ; IPI00741107	human	Tumor only										3	2			3	3			No	84	42.1194	No	cell;	ISOFORM 1 OF MELANOMA INHIBITORY ACTIVITY PROTEIN 3 PRECURSOR.
EXOC4	IPI00059279 ; IPI00655649	human	Tumor only										1	1			4	4			No	57.5	45.3605	No	proteincomplex;cytoplasm;"GO:0005737,IDA" /// proteincomplex;cytoplasm;	EXOCYST COMPLEX COMPONENT 4.
NUP153	IPI00292059	human	Tumor only										6	3			1	1			No	67	60.9661	No	cell;nucleoplasm;proteincomplex;nucleus;nuclearenvelope;intracellular;"GO:0005654,EXP"	NUCLEAR PORE COMPLEX PROTEIN NUP153.
ACIN1	IPI00007334 ; IPI00215975 ; IPI00297991	human	Tumor only										4	3	0.535332	0.06	4	3	0.494109	0	No	50.6667	60.9221	No	cytoplasm;nucleolus;cytosol;nucleus;"GO:0005634,IDA;GO:0005634,IDA;GO:0005634,IDA;GO:0005737,IDA;GO:0005737,IDA;GO:0005737,IDA;GO:0005829,EXP" /// nucleolus;cytosol;nucleus;cytoplasm;"GO:0005634,IDA;GO:0005634,IDA;GO:0005634,IDA;GO:0005737,IDA;GO:0005737,	ISOFORM 1 OF APOPTOTIC CHROMATIN CONDENSATION INDUCER IN THE NUCLEUS.
SRP68	IPI00102936 ; IPI00168388	human	Tumor only										5	4	0.304006	0	5	5	0.152003	0.14	No	48	49.6217	No	nucleolus;nucleus;ribosome;cytoplasm;endoplasmicreticulum;	ISOFORM 2 OF SIGNAL RECOGNITION PARTICLE 68 KDA PROTEIN.
H1F0	IPI00550239	human	Tumor only										6	2			3	2			No	17	22.5912	Yes	nucleus;cytoskeleton;chromosome;Golgiapparatus;"GO:0005794,IDA;GO:0005856,IDA"	HISTONE H1.0.
MYL6B	IPI00413922	human	Tumor only														33	4			not annotated	8	20.1948	Yes		11 KDA PROTEIN.
;RPL29	IPI00052885 ; IPI00173589 ; IPI00419919 ; IPI00454907 ; IPI00644657 ; IPI00792336 ; IPI00792866 ; IPI00796934 ; IPI00888051	human	Tumor only										14	2			6	1			No	16.6667	30.6457	Yes	cytosol;intracellular;ribosome;"GO:0005829,EXP" /// intracellular;ribosome;	SIMILAR TO HCG1641491 ISOFORM 2.
RAB3D	IPI00032808	human	Tumor only										1	1			2	2			No	17	36.0932	Yes	plasmamembrane;cytoplasmicmembrane-boundedvesicle;	RAS-RELATED PROTEIN RAB-3D.
HSPA4	IPI00002966	human	Tumor only										46	20	-0.0285692	0.18	31	11	0.152003	0.09	No	61	44.5245	No	cytoplasm;	HEAT SHOCK 70 KDA PROTEIN 4.
SCFD1	IPI00165261 ; IPI00374338 ; IPI00794956	human	Tumor only										11	6			8	5			No	36	33.9864	Yes	cell;nucleus;cytoplasm;endoplasmicreticulum;Golgiapparatus;"GO:0005634,IDA" /// nucleus;cytoplasm;"GO:0005634,IDA;GO:0005737,IDA"	SEC1 FAMILY DOMAIN-CONTAINING PROTEIN 1.
SUMF2	IPI00334514	human	Tumor only														11	2			No	20	37.7289	Yes	intracellular;organelle;endoplasmicreticulum;	ISOFORM 3 OF SULFATASE-MODIFYING FACTOR 2 PRECURSOR.
SURF4	IPI00005737 ; IPI00399142 ; IPI00641719	human	Tumor only										9	3	-0.0565835	0.05	2	2	-0.238787	0	No	11	32.4424	Yes	cell;cytoplasm;endoplasmicreticulum;"GO:0005737,IDA"	ISOFORM 1 OF SURFEIT LOCUS PROTEIN 4.
HSPA6	IPI00339269	human	Tumor only										40	7	0.836501	0.02					not annotated	44	38.3858	Yes		HEAT SHOCK 70 KDA PROTEIN 6.
APEX1	IPI00215911	human	Tumor only										16	7	0.0740006	0.04	12	4	0.200913	0.07	No	22	43.412	No	nucleoplasm;nucleus;intracellular;ribosome;microtubuleorganizingcenter;cytoplasm;endoplasmicreticulum;"GO:0005634,IDA;GO:0005654,EXP;GO:0005654,EXP;GO:0005654,EXP;GO:0005815,IDA;GO:0005737,IDA"	DNA-(APURINIC OR APYRIMIDINIC SITE) LYASE.
ACYP1;C17orf13	IPI00221117 ; IPI00746224	human	Tumor only										2	2							not annotated	8	8.73839	Yes		ACYLPHOSPHATASE-1.
EIF3A	IPI00029012	human	Tumor only										51	18			27	15			No	113	62.8588	No	proteincomplex;cytosol;cytoplasm;"GO:0005829,EXP"	EUKARYOTIC TRANSLATION INITIATION FACTOR 3 SUBUNIT A.
ARL1	IPI00219518	human	Tumor only														8	2			No	13	31.3939	Yes	intracellular;Golgiapparatus;"GO:0005794,IDA"	ADP-RIBOSYLATION FACTOR-LIKE PROTEIN 1.
RPAP1	IPI00402657 ; IPI00844387	human	Tumor only										1	1			2	2			No	71.5	57.1887	No	nucleus;	ISOFORM 1 OF RNA POLYMERASE II-ASSOCIATED PROTEIN 1.
MYCBP	IPI00554793 ; IPI00871174	human	Tumor only										5	2			13	2			No	8	50.1961	No	nucleus;mitochondrion;cytoplasm;"GO:0005634,IDA;GO:0005737,IDA;GO:0005737,IDA"	C-MYC-BINDING PROTEIN.
CA3	IPI00216983	human	Tumor only										8	2			11	2			No	16	39.7835	Yes	cytoplasm;	CARBONIC ANHYDRASE 3.
SF3B4	IPI00017339	human	Tumor only										12	4			21	4			No	14	52.5016	No	nucleus;"GO:0005634,IDA"	SPLICING FACTOR 3B SUBUNIT 4.
MRPS34	IPI00169413 ; IPI00658155 ; IPI00845406	human	Tumor only										2	2			1	1			No	15	54.0771	No	mitochondrion;ribosome; /// ribosome;	MITOCHONDRIAL 28S RIBOSOMAL PROTEIN S34.
COX17	IPI00218144 ; IPI00796062	human	Tumor only										3	2	0.736966	0					No	6.5	57.2469	No	mitochondrion;cytoplasm;	CYTOCHROME C OXIDASE COPPER CHAPERONE.
CYB5R2	IPI00008234 ; IPI00332396	human	Tumor only										4	4	-0.0426443	0	5	2			No	17.5	42.3376	No	cell;"GO:0005623,IDA"	ISOFORM 1 OF NADH-CYTOCHROME B5 REDUCTASE 2.
PVRL1	IPI00003648 ; IPI00218887 ; IPI00218888	human	Tumor only										6	2	-0.275007	0.01					Yes	24.3333	25.6901	Yes	extracellularregion;cell;plasmamembrane; /// cell;plasmamembrane;extracellularregion;	ISOFORM DELTA OF POLIOVIRUS RECEPTOR-RELATED PROTEIN 1 PRECURSOR.
DHCR24	IPI00016703 ; IPI00647760	human	Tumor only										15	3			4	3	0.184425	0	No	18.5	43.3734	No	cell;endoplasmicreticulum;nucleus;Golgiapparatus;"GO:0005634,IDA;GO:0005783,IDA;GO:0005783,EXP"	24-DEHYDROCHOLESTEROL REDUCTASE PRECURSOR.
NID1	IPI00026944 ; IPI00384542	human	Tumor only										6	3	1.25154	0.03					Yes	52	45.8803	No	proteinaceousextracellularmatrix;cell;extracellularregion;	ISOFORM 1 OF NIDOGEN-1 PRECURSOR.
FDFT1	IPI00020944 ; IPI00797743	human	Tumor only														2	2			No	20	42.7973	No	cell;endoplasmicreticulum;"GO:0005783,EXP"	SQUALENE SYNTHETASE.
CAPN2	IPI00289758 ; IPI00872686	human	Tumor only										19	5	-0.137504	0.09	33	7	0.577767	0.19	No	39	39.8847	No	plasmamembrane;intracellular;cytoplasm; /// intracellular;	CALPAIN-2 CATALYTIC SUBUNIT PRECURSOR.
ME2	IPI00011201 ; IPI00643577	human	Tumor only										1	1			2	2	0.251539	0	No	30	42.4923	No	mitochondrion;	NAD-DEPENDENT MALIC ENZYME, MITOCHONDRIAL PRECURSOR.
COASY	IPI00184821 ; IPI00783178	human	Tumor only										2	2							No	22.5	48.9981	No	cellular_component;cytoplasm;	BIFUNCTIONAL COENZYME A SYNTHASE.
ALOX15B	IPI00005781 ; IPI00220009 ; IPI00220010 ; IPI00470667	human	Tumor only														4	3	-0.411426	0	No	39.5	42.1908	No	intracellular;cytoplasm;"GO:0005622,IDA"	ISOFORM A OF ARACHIDONATE 15-LIPOXYGENASE TYPE II.
;HLA-A;HLA-A;HLA-B;HLA-C;MICA;MICB	IPI00004672 ; IPI00026569 ; IPI00472112 ; IPI00472151 ; IPI00472448 ; IPI00472855 ; IPI00644748 ; IPI00647457 ; IPI00647634 ; IPI00742968 ; IPI00794678 ; IPI00816779 ; IPI00829792 ; IPI00847323 ; IPI00871885	human	Tumor only										83	12	0.217591	0.19	64	10	0.120294	0.14	No	21.5	36.5728	Yes	plasmamembrane;proteincomplex; /// cell;plasmamembrane;proteincomplex; /// plasmamembrane;cell;proteincomplex;	HLA CLASS I HISTOCOMPATIBILITY ANTIGEN, ALPHA CHAIN H PRECURSOR.
MYH13	IPI00007858	human	Tumor only										58	18	1.59946	0.03					No	149	50.1957	No	cytoplasm;proteincomplex;cytoskeleton;	MYOSIN-13.
FARSA	IPI00031820	human	Tumor only										10	7	-0.201634	0	6	5	0.37707	0	No	32	39.9659	Yes	cell;cytoplasm;	PHENYLALANYL-TRNA SYNTHETASE ALPHA CHAIN.
KPNA2	IPI00002214 ; IPI00789457	human	Tumor only										5	3			3	3			No	27	43.7189	No	cytoplasm;nucleoplasm;proteincomplex;nucleus;nuclearenvelope; /// proteincomplex;nucleus;nuclearenvelope;cytoplasm;	IMPORTIN SUBUNIT ALPHA-2.
DCI	IPI00300567 ; IPI00398758	human	Tumor only										4	2	-0.201634	0.02	4	2	0.304006	0.01	No	18.5	39.9099	No	mitochondrion;	ISOFORM 1 OF 3,2-TRANS-ENOYL-COA ISOMERASE, MITOCHONDRIAL PRECURSOR.
KRTDAP	IPI00216626 ; IPI00885075	human	Tumor only										19	2			20	2			Yes	3	54.34	No	extracellularregion;	ISOFORM 1 OF KERATINOCYTE DIFFERENTIATION-ASSOCIATED PROTEIN PRECURSOR.
AP1B1	IPI00328257 ; IPI00384489 ; IPI00413947	human	Tumor only										21	12			21	10	0.915936	0.2	No	51	36.1433	Yes	cell;proteincomplex;cytosol;organelle;cytoplasm;Golgiapparatus;"GO:0005829,EXP" /// proteincomplex;cytoplasm;	ISOFORM A OF AP-1 COMPLEX SUBUNIT BETA-1.
GSDMDC1	IPI00028027 ; IPI00793132	human	Tumor only										5	4	-0.275007	0.07					not annotated	22	48.756	No		GASDERMIN DOMAIN-CONTAINING PROTEIN 1.
HSPB7	IPI00220916 ; IPI00375714 ; IPI00641046 ; IPI00646868	human	Tumor only										2	2	0.200913	0	1	1			not annotated	13	38.6106	No		ISOFORM 2 OF HEAT SHOCK PROTEIN BETA-7.
ALDH7A1	IPI00221234	human	Tumor only										8	4	0.184425	0	11	9	0.556393	0.04	No	31	34.5356	Yes	mitochondrion;cellular_component;	SIMILAR TO ANTIQUITIN.
PRKDC	IPI00296337 ; IPI00376215 ; IPI00786995	human	Tumor only										50	26	0.136062	0.09	108	45	-0.201634	0.33	No	278.5	48.6267	No	nucleoplasm;proteincomplex;nucleus;"GO:0005654,EXP;GO:0005654,EXP;GO:0005634,IDA;GO:0043234,IDA"	ISOFORM 1 OF DNA-DEPENDENT PROTEIN KINASE CATALYTIC SUBUNIT.
G6PD	IPI00216008 ; IPI00289800 ; IPI00642620 ; IPI00645745 ; IPI00853547 ; IPI00884082	human	Tumor only										8	5	-0.226509	0	7	5	0.268817	0	No	31.2	40.2979	No	cytosol;intracellular;cellular_component;organelle;microtubuleorganizingcenter;cytoplasm;"GO:0005737,IDA;GO:0005737,IDA;GO:0005815,IDA;GO:0005829,EXP;GO:0043226,IDA;GO:0005622,IDA"	ISOFORM LONG OF GLUCOSE-6-PHOSPHATE 1-DEHYDROGENASE.
ARL3	IPI00003327	human	Tumor only										3	3			8	2	0.304006	0	No	14	45.1659	No	intracellular;	ADP-RIBOSYLATION FACTOR-LIKE PROTEIN 3.
RPS4X	IPI00217030	human	Tumor only										46	10	0.286304	0.27	46	9	-1.12433	1.59	No	23	19.6407	Yes	cytosol;intracellular;ribosome;"GO:0005829,EXP;GO:0005840,IDA"	40S RIBOSOMAL PROTEIN S4, X ISOFORM.
PEF1	IPI00018235	human	Tumor only										7	2			5	2			No	9	43.6437	No	cell;cytoplasm;"GO:0005737,IDA"	PEFLIN.
COPB2	IPI00220219	human	Tumor only										16	5			18	8	-0.321928	0	No	55	33.5582	Yes	cell;proteincomplex;cytosol;organelle;cytoplasm;cytoplasmicmembrane-boundedvesicle;Golgiapparatus;"GO:0005829,EXP;GO:0005829,EXP;GO:0016023,IDA;GO:0005794,IDA;GO:0043234,IDA"	COATOMER SUBUNIT BETA'.
DHRS1	IPI00065063	human	Tumor only														3	2	-0.0703893	0.07	No	19	48.0316	No	nucleus;mitochondrion;cytoplasm;endoplasmicreticulum;Golgiapparatus;"GO:0005634,IDA;GO:0005737,IDA;GO:0005783,IDA;GO:0005794,IDA"	DEHYDROGENASE/REDUCTASE SDR FAMILY MEMBER 1.
RAB3GAP2	IPI00554590	human	Tumor only														5	3			No	77	45.0354	No	cell;cytoplasm;	ISOFORM 1 OF RAB3 GTPASE-ACTIVATING PROTEIN NON-CATALYTIC SUBUNIT.
MCM2	IPI00184330	human	Tumor only														12	6	-0.275007	0.02	No	59	55.5951	No	nucleoplasm;proteincomplex;nucleus;chromosome;nuclearchromosome;"GO:0005654,EXP;GO:0005654,EXP;GO:0005654,EXP;GO:0005654,EXP;GO:0005654,EXP;GO:0005654,EXP;GO:0005654,EXP"	DNA REPLICATION LICENSING FACTOR MCM2.
MYH7	IPI00025880 ; IPI00872223	human	Tumor only														129	14			No	147	47.0504	No	plasmamembrane;cytoplasm;nucleolus;proteincomplex;nucleus;cytoskeleton;"GO:0005634,IDA;GO:0005730,IDA;GO:0005886,IDA"	MYOSIN-7.
SNX6	IPI00258833 ; IPI00298111	human	Tumor only										1	1			5	4	0.268817	0	No	27.5	37.1524	Yes	intracellular;cytoplasm;"GO:0005737,IDA"	SORTING NEXIN 6 ISOFORM A.
	IPI00411639	human	Tumor only										14	5			25	6			No	16	37.3742	Yes	intracellular;ribosome;	LAMININ RECEPTOR-LIKE PROTEIN LAMRL5.
HADHB	IPI00022793	human	Tumor only										13	8	0.0740006	0.03	13	4	0.152003	0.03	No	32	31.2973	Yes	mitochondrion;"GO:0005739,EXP"	TRIFUNCTIONAL ENZYME SUBUNIT BETA, MITOCHONDRIAL PRECURSOR.
GLS	IPI00215687 ; IPI00289159	human	Tumor only										6	5	-0.15056	0.05	14	5	-0.0976108	0.05	No	45	49.5469	No	mitochondrion;"GO:0005739,EXP"	ISOFORM GAC OF GLUTAMINASE KIDNEY ISOFORM, MITOCHONDRIAL PRECURSOR.
IGFBP3	IPI00018305 ; IPI00444386 ; IPI00556155 ; IPI00855835	human	Tumor only										15	5	0.785875	0.03	14	7	2.32193	0.05	Yes	21.3333	49.5246	No	extracellularspace;extracellularregion;proteincomplex;nucleus;"GO:0005634,IDA" /// extracellularspace;extracellularregion; /// extracellularregion;	INSULIN-LIKE GROWTH FACTOR-BINDING PROTEIN 3 PRECURSOR.
RAD23B	IPI00008223	human	Tumor only										22	5	0.473931	0.02	88	7	0.621488	0.04	No	17	51.2247	No	cytoplasm;nucleoplasm;proteincomplex;cytosol;nucleus;"GO:0005654,EXP"	UV EXCISION REPAIR PROTEIN RAD23 HOMOLOG B.
DNAJC8	IPI00003438	human	Tumor only										4	2			5	2			not annotated	19	51.6921	No		DNAJ HOMOLOG SUBFAMILY C MEMBER 8.
GBP3	IPI00026544 ; IPI00798277	human	Tumor only										10	5	0.454032	0.01					not annotated	40	39.5749	Yes		ISOFORM 1 OF GUANYLATE-BINDING PROTEIN 3.
THRAP3	IPI00104050	human	Tumor only										4	1			22	8			No	74	79.7252	No	nucleoplasm;nucleus;proteincomplex;"GO:0005654,IDA;GO:0043234,IDA;GO:0005634,IDA"	THYROID HORMONE RECEPTOR-ASSOCIATED PROTEIN 3.
LYPD3	IPI00004310 ; IPI00643788	human	Tumor only										53	5	0.395929	0.2	24	4	0.234465	0.31	No	21	42.8422	No	plasmamembrane;	LY6/PLAUR DOMAIN-CONTAINING PROTEIN 3 PRECURSOR.
HTATIP2	IPI00383665 ; IPI00784029 ; IPI00847689	human	Tumor only										4	2	0.473931	0.01					No	18.3333	24.2789	Yes	nucleus;nuclearenvelope;cytoplasm;"GO:0005635,IDA;GO:0005737,IDA"	ISOFORM 2 OF OXIDOREDUCTASE HTATIP2.
NPLOC4	IPI00001676 ; IPI00290543	human	Tumor only										12	5			10	8	1.2863	0	No	36	38.2094	Yes	intracellular;cell;cytoplasm;endoplasmicreticulum;nucleus; /// cell;nucleus;intracellular;cytoplasm;endoplasmicreticulum;	ISOFORM 2 OF NUCLEAR PROTEIN LOCALIZATION PROTEIN 4 HOMOLOG.
GDI1	IPI00010154	human	Tumor only										57	11	0.217591	0.11	57	8	0.217591	0	No	28	30.3544	Yes	cytoplasm;	RAB GDP DISSOCIATION INHIBITOR ALPHA.
MXRA5	IPI00012347	human	Tumor only										3	2			3	1			Yes	177	48.7272	No	extracellularregion;	MATRIX-REMODELING-ASSOCIATED PROTEIN 5 PRECURSOR.
ABCF1	IPI00013495 ; IPI00792186 ; IPI00873899	human	Tumor only										8	3	0.234465	0	16	6			not annotated	52	47.2974	No		ISOFORM 2 OF ATP-BINDING CASSETTE SUB-FAMILY F MEMBER 1.
TOMM40	IPI00014053 ; IPI00376117	human	Tumor only										2	1			8	2	0.494109	0.06	No	11	45.1922	No	cell;proteincomplex;mitochondrion;"GO:0043234,IDA;GO:0005739,IDA"	ISOFORM 1 OF MITOCHONDRIAL IMPORT RECEPTOR SUBUNIT TOM40 HOMOLOG.
FADD	IPI00011919	human	Tumor only										19	3	0.415037	0.05	22	3	0.200913	0.06	No	12	56.6188	No	cytoplasm;cytosol;nucleus;Golgiapparatus;"GO:0005634,IDA;GO:0005737,IDA;GO:0005794,IDA;GO:0005829,EXP;GO:0005829,EXP;GO:0005829,EXP;GO:0005829,EXP;GO:0005829,EXP"	PROTEIN FADD.
C12orf10	IPI00029444 ; IPI00304163 ; IPI00796436 ; IPI00797519	human	Tumor only										2	2			4	3			No	21.25	35.698	No	cellular_component;	UPF0160 PROTEIN MYG1.
MX1	IPI00167949 ; IPI00794288 ; IPI00794837 ; IPI00796515	human	Tumor only										35	12	1	0.02	1	1			No	36.6667	28.496	Yes	cytoplasm;"GO:0005737,IDA"	INTERFERON-INDUCED GTP-BINDING PROTEIN MX1.
ANXA1	IPI00218918	human	Tumor only										75	11	0.152003	0.17	163	12	0.268817	0.11	No	29	41.7844	No	plasmamembrane;nucleus;cytoskeleton;cytoplasm;cilium;"GO:0005856,IDA"	ANNEXIN A1.
TPM1	IPI00014581	human	Tumor only										19	8			62	12			No	30	41.0173	No	cytoplasm;proteincomplex;cytoskeleton;	ISOFORM 1 OF TROPOMYOSIN ALPHA-1 CHAIN.
CREG1	IPI00021997 ; IPI00874212	human	Tumor only														7	2			Yes	13.5	39.9014	No	extracellularregion;	PROTEIN CREG1 PRECURSOR.
PAIP1	IPI00021466 ; IPI00337775 ; IPI00386299 ; IPI00455339	human	Tumor only										1	1	0.473931	0	6	5	0.268817	0.05	No	22.5	42.6886	No	cytoplasm;	ISOFORM 1 OF POLYADENYLATE-BINDING PROTEIN-INTERACTING PROTEIN 1.
ANK3	IPI00333558 ; IPI00472779 ; IPI00640458 ; IPI00640884 ; IPI00871666 ; IPI00871968	human	Tumor only										3	3							No	119.2	39.3612	No	cell;cytoskeleton;cellular_component;cytoplasm; /// endoplasmicreticulum;Golgiapparatus;	PUTATIVE UNCHARACTERIZED PROTEIN DKFZP686I225.
SLC25A1	IPI00294159 ; IPI00852927	human	Tumor only														2	2			No	18.5	11.9394	Yes	cell;mitochondrion;	TRICARBOXYLATE TRANSPORT PROTEIN, MITOCHONDRIAL PRECURSOR.
C12orf23	IPI00184546	human	Tumor only										1	1			2	2			No	9	25.3345	Yes	cell;	UPF0444 PROTEIN C12ORF23.
MRPS18B	IPI00022316 ; IPI00445391 ; IPI00514716 ; IPI00645347 ; IPI00827623	human	Tumor only										4	3							No	10	64.5307	No	intracellular;ribosome;mitochondrion; /// ribosome; /// intracellular;ribosome;	28S RIBOSOMAL PROTEIN S18B, MITOCHONDRIAL PRECURSOR.
UNC84A	IPI00306682 ; IPI00335367	human	Tumor only										3	1			3	2			No	14.5	45.8361	No	cell;nucleus;nuclearenvelope;cytoplasm;	ISOFORM 3 OF PROTEIN UNC-84 HOMOLOG A.
HSD17B12	IPI00007676	human	Tumor only										5	3	-0.0840643	0	15	6	-0.321928	0.01	No	17	35.3609	Yes	cell;endoplasmicreticulum;	ESTRADIOL 17-BETA-DEHYDROGENASE 12.
ALDH2	IPI00006663 ; IPI00792207	human	Tumor only										11	5	0.136062	0.19	17	6	0.599462	0	No	27	32.276	Yes	mitochondrion;	ALDEHYDE DEHYDROGENASE, MITOCHONDRIAL PRECURSOR.
	IPI00027378 ; IPI00396563	human	Tumor only										18	4			1	1			No	17.5	67.359	No	cytoplasm;"GO:0005737,IDA"	ISOFORM 1 OF SAPK SUBSTRATE PROTEIN 1.
NPC2	IPI00301579	human	Tumor only										6	2	0.434403	0.01	7	2	0.810966	0.16	Yes	10	44.2762	No	nucleus;extracellularregion;lysosome;cytoplasm;"GO:0005634,IDA;GO:0005737,IDA;GO:0005764,IDA"	EPIDIDYMAL SECRETORY PROTEIN E1 PRECURSOR.
NOLA2	IPI00041325 ; IPI00654617	human	Tumor only										5	2	0.184425	0.01	7	2	0.621488	0	No	4	42.99	No	nucleus;intracellular;	H/ACA RIBONUCLEOPROTEIN COMPLEX SUBUNIT 2.
RAB8A	IPI00028481	human	Tumor only										1	1			3	3			not annotated	18	34.6647	Yes		RAS-RELATED PROTEIN RAB-8A.
CNDP2	IPI00177728 ; IPI00642656 ; IPI00642792 ; IPI00643827 ; IPI00646632	human	Tumor only										60	18	0.473931	0.03	44	12	0.761213	0	not annotated	17.25	33.3694	Yes		CYTOSOLIC NON-SPECIFIC DIPEPTIDASE.
COX4I1	IPI00006579 ; IPI00645361	human	Tumor only										4	2			3	2			No	12.5	26.9107	Yes	cell;nucleus;mitochondrion;"GO:0005634,IDA" /// mitochondrion;	CYTOCHROME C OXIDASE SUBUNIT 4 ISOFORM 1, MITOCHONDRIAL PRECURSOR.
MX2	IPI00024684	human	Tumor only										19	4	1	0.02					No	49	44.2277	No	cytoplasm;nucleus;	INTERFERON-INDUCED GTP-BINDING PROTEIN MX2.
CTSL2	IPI00000013	human	Tumor only										1	1			3	2			No	22	22.6443	Yes	lysosome;	CATHEPSIN L2 PRECURSOR.
IFI35	IPI00008613 ; IPI00218475	human	Tumor only										3	2	0.0892673	0.08	1	1			No	22	57.0198	No	nucleus;"GO:0005634,IDA"	ISOFORM 1 OF INTERFERON-INDUCED 35 KDA PROTEIN.
STAU1	IPI00000001 ; IPI00218609 ; IPI00641873 ; IPI00643664	human	Tumor only										20	7	0.434403	0	6	5			No	34.5	43.6735	No	intracellular;proteincomplex;endoplasmicreticulum;cytoskeleton; /// proteincomplex;cytoskeleton;intracellular;endoplasmicreticulum; /// intracellular;	ISOFORM LONG OF DOUBLE-STRANDED RNA-BINDING PROTEIN STAUFEN HOMOLOG 1.
LRRC59	IPI00396321	human	Tumor only										19	6	-0.333424	0.13	8	4	0.152003	0.01	No	25	54.0873	No	cell;endoplasmicreticulum;	LEUCINE-RICH REPEAT-CONTAINING PROTEIN 59.
CLPTM1	IPI00107357 ; IPI00396411	human	Tumor only										7	4	-0.238787	0	7	5	-0.31034	0	No	32	40.2732	No	cell;plasmamembrane;	ISOFORM 2 OF CLEFT LIP AND PALATE TRANSMEMBRANE PROTEIN 1.
IL1F9	IPI00021343 ; IPI00432063	human	Tumor only										7	4	-0.0840643	0.04	5	4	0.713119	0	Yes	9	37.5994	Yes	extracellularspace;extracellularregion;	ISOFORM 1 OF INTERLEUKIN-1 FAMILY MEMBER 9.
NOLC1	IPI00216654 ; IPI00292387	human	Tumor only										6	3			8	4			No	53	75.3162	No	nucleolus;nucleus;cytoplasm;	ISOFORM BETA OF NUCLEOLAR PHOSPHOPROTEIN P130.
ATP5C1	IPI00395769 ; IPI00478410	human	Tumor only										20	5	-0.275007	0.07	20	4			No	19	32.3775	Yes	cell;proteincomplex;mitochondrion;"GO:0005739,EXP"	ISOFORM HEART OF ATP SYNTHASE SUBUNIT GAMMA, MITOCHONDRIAL PRECURSOR.
PURA	IPI00023591	human	Tumor only										4	2			3	1			No	17	58.605	No	cytoplasm;proteincomplex;nucleus;nuclearchromosome;"GO:0005634,IDA"	TRANSCRIPTIONAL ACTIVATOR PROTEIN PUR-ALPHA.
PTPLAD1	IPI00008998 ; IPI00787433	human	Tumor only										3	3			2	2			No	16.5	40.5808	No	cellular_component;cell;	PROTEIN TYROSINE PHOSPHATASE-LIKE PROTEIN PTPLAD1.
NMNAT3	IPI00290687 ; IPI00793647 ; IPI00796510	human	Tumor only										2	2	0.915936	0					No	13.3333	33.1803	Yes	nucleus;	ISOFORM 1 OF NICOTINAMIDE MONONUCLEOTIDE ADENYLYLTRANSFERASE 3.
COPS7A	IPI00301419 ; IPI00798179	human	Tumor only										3	2			6	5			No	14.5	32.9988	Yes	proteincomplex;nucleus;cytoplasm;	COP9 SIGNALOSOME COMPLEX SUBUNIT 7A.
ERLIN1	IPI00007940 ; IPI00879747	human	Tumor only										2	2			8	3			No	25	44.3371	No	cell;endoplasmicreticulum;"GO:0005783,IDA"	ER LIPID RAFT ASSOCIATED 1.
SARS	IPI00220637 ; IPI00514587	human	Tumor only										37	11	0.104697	0.01	37	7			No	41	36.8932	Yes	cytoplasm;	SERYL-TRNA SYNTHETASE, CYTOPLASMIC.
TMED10	IPI00028055	human	Tumor only										21	3			30	4			No	16	51.7206	No	cell;cytoplasm;cytoplasmicmembrane-boundedvesicle;Golgiapparatus;"GO:0005737,IDA"	TRANSMEMBRANE EMP24 DOMAIN-CONTAINING PROTEIN 10 PRECURSOR.
FAM83B	IPI00304527	human	Tumor only										16	8			6	6			not annotated	72	54.5328	No		PROTEIN FAM83B.
CCDC128	IPI00396527	human	Tumor only										2	2							not annotated	55	52.9012	No		ISOFORM 1 OF COILED-COIL DOMAIN-CONTAINING PROTEIN 128.
NDUFB8	IPI00028883 ; IPI00479154 ; IPI00642807	human	Tumor only										1	1			2	2			No	12	42.7134	No	cell;proteincomplex;mitochondrion;endoplasmicreticulum;"GO:0005783,IDA" /// mitochondrion;	NADH DEHYDROGENASE [UBIQUINONE] 1 BETA SUBCOMPLEX SUBUNIT 8, MITOCHONDRIAL PRECURSOR.
KIAA0368	IPI00157790	human	Tumor only										3	2			11	9	0.340075	0	No	137	49.0049	No	cytosol;nucleus;proteincomplex;intracellular;endosome;microtubuleorganizingcenter;cytoplasm;endoplasmicreticulum;cytoplasmicmembrane-boundedvesicle;Golgiapparatus;"GO:0005622,IDA;GO:0043234,IDA;GO:0005634,IDA;GO:0005768,IDA;GO:0005768,IDA;GO:0005783,IDA;G	KIAA0368 PROTEIN.
RAC2	IPI00010270 ; IPI00877663 ; IPI00878066 ; IPI00879948	human	Tumor only										6	3	0.234465	0.08	4	2	-0.584963	0.03	No	10	32.3958	No	intracellular;cytoplasm;cell;nuclearenvelope; /// cell;intracellular; /// cell;nuclearenvelope;intracellular;cytoplasm;	RAS-RELATED C3 BOTULINUM TOXIN SUBSTRATE 2 PRECURSOR.
APP	IPI00006608 ; IPI00219182 ; IPI00219185 ; IPI00219186 ; IPI00219187 ; IPI00412681 ; IPI00412924	human	Tumor only										4	2	-0.879706	0.05					Yes	39.1429	38.4302	Yes	extracellularregion;cell;plasmamembrane;cytoplasm;cytoplasmicmembrane-boundedvesicle;Golgiapparatus;"GO:0005576,EXP;GO:0005737,IDA;GO:0005794,IDA;GO:0005886,IDA;GO:0005623,IDA;GO:0016023,EXP" /// cell;plasmamembrane;extracellularregion;cytoplasm;cytoplasm	ISOFORM APP770 OF AMYLOID BETA A4 PROTEIN PRECURSOR (FRAGMENT).
DIAPH1	IPI00030876 ; IPI00783474 ; IPI00852685 ; IPI00884341	human	Tumor only										16	12	-0.214125	0.16	22	15	-0.0285692	0.04	No	80	59.1208	No	cell;plasmamembrane;cytoskeleton;cytoplasm;	DIAPHANOUS 1 ISOFORM 2.
SPINK5	IPI00478816 ; IPI00654656 ; IPI00873456	human	Tumor only										47	11	1.21759	0.05	3	3	0.713119	0	Yes	99	46.6942	No	cytosol;extracellularregion;cytoplasm;endoplasmicreticulum;cytoplasmicmembrane-boundedvesicle;Golgiapparatus;"GO:0005576,IDA;GO:0005737,IDA;GO:0005783,IDA;GO:0005783,IDA;GO:0005794,IDA;GO:0005829,IDA;GO:0005737,IDA;GO:0005737,IDA" /// cytoplasm;Golgiappar	SERINE PROTEASE INHIBITOR KAZAL-TYPE 5 PRECURSOR.
S100A2	IPI00019869 ; IPI00514806 ; IPI00873099	human	Tumor only										12	2	-0.333424	0.12	31	3	-0.378512	0.14	No	7.5	24.7663	Yes	cellular_component;	PROTEIN S100-A2.
TUBAL3	IPI00015671 ; IPI00872463 ; IPI00879904	human	Tumor only										25	4	0.0291463	0.14					No	26.5	36.3884	Yes	proteincomplex;cytoskeleton;	ISOFORM 1 OF TUBULIN ALPHA CHAIN-LIKE 3.
DLD	IPI00015911	human	Tumor only										34	6	0.184425	0.06	23	5	0.0439433	0.04	No	33	28.0717	Yes	cytoplasm;mitochondrion;"GO:0005739,EXP"	DIHYDROLIPOYL DEHYDROGENASE, MITOCHONDRIAL PRECURSOR.
EHD4	IPI00005578	human	Tumor only										15	11	0.268817	0.04	8	8	-0.176323	0	No	38	34.6952	Yes	endoplasmicreticulum;nucleus;"GO:0005783,IDA"	EH DOMAIN-CONTAINING PROTEIN 4.
ITGB6	IPI00000151	human	Tumor only										16	5	-0.464668	0.14	7	5	0.0740006	0.14	No	43	42.2643	No	cell;plasmamembrane;proteincomplex;	INTEGRIN BETA-6 PRECURSOR.
WDR55	IPI00302990	human	Tumor only										2	2	-0.0285692	0					not annotated	25	46.312	No		WD REPEAT-CONTAINING PROTEIN 55.
NDUFA8	IPI00219034	human	Tumor only										15	4	-0.0840643	0.11	10	2	0.0439433	0.03	No	11	55.7268	No	proteincomplex;mitochondrion;	NADH DEHYDROGENASE [UBIQUINONE] 1 ALPHA SUBCOMPLEX SUBUNIT 8.
SHMT2	IPI00002520 ; IPI00789370	human	Tumor only										14	7	0.0439433	0.09	20	9	1.152	0.12	No	39	39.1389	Yes	mitochondrion;"GO:0005739,IDA;GO:0005739,IDA"	SERINE HYDROXYMETHYLTRANSFERASE, MITOCHONDRIAL PRECURSOR.
CDS2	IPI00032150	human	Tumor only														2	2			No	22	39.873	Yes	cell;mitochondrion;endoplasmicreticulum;	ISOFORM 1 OF PHOSPHATIDATE CYTIDYLYLTRANSFERASE 2.
PRKAR2A;PRKAR2B	IPI00063234 ; IPI00219774 ; IPI00554752 ; IPI00788668 ; IPI00789242	human	Tumor only										2	2			3	1			No	27	44.7178	No	proteincomplex;intracellular; /// plasmamembrane;cell;proteincomplex;intracellular;cytoplasm; /// proteincomplex;mitochondrion;intracellular;microtubuleorganizingcenter;cytoplasm;Golgiapparatus;"GO:0005737,IDA;GO:0005739,IDA;GO:0005794,IDA;GO:0005815,IDA"	PRKAR2A PROTEIN.
NDUFS8	IPI00010845	human	Tumor only										3	2	-0.201634	0	2	1	0.217591	0	No	18	43.0891	No	proteincomplex;mitochondrion;"GO:0005739,IDA;GO:0043234,IMP;GO:0005739,IMP"	NADH DEHYDROGENASE [UBIQUINONE] IRON-SULFUR PROTEIN 8, MITOCHONDRIAL PRECURSOR.
	IPI00328526 ; IPI00745466 ; IPI00792984	human	Tumor only										6	2			6	3			No	8	53.5167	No	cytoplasm;	ISOFORM ARPP-19 OF CAMP-REGULATED PHOSPHOPROTEIN 19.
GANAB	IPI00011454 ; IPI00441414	human	Tumor only														101	23	0.0588937	0.08	No	51	39.4678	No	proteincomplex;endoplasmicreticulum;cytoplasmicmembrane-boundedvesicle;Golgiapparatus;	ISOFORM 2 OF NEUTRAL ALPHA-GLUCOSIDASE AB PRECURSOR.
HNRNPH2	IPI00026230	human	Tumor only										62	8	0.556393	0.04	51	7	0.340075	0.03	No	27	32.9887	Yes	nucleus;cytoskeleton;"GO:0005856,IDA"	HETEROGENEOUS NUCLEAR RIBONUCLEOPROTEIN H2.
UQCRH	IPI00296022 ; IPI00455418 ; IPI00872952	human	Tumor only										11	1	-0.0426443	0.02	9	2	0.168123	0.02	No	6.5	51.4624	No	cell;mitochondrion;	CYTOCHROME B-C1 COMPLEX SUBUNIT 6, MITOCHONDRIAL PRECURSOR.
BRI3BP	IPI00103599	human	Tumor only										3	2			2	2			No	12	40.2359	No	cell;	BRI3-BINDING PROTEIN.
NUP93	IPI00397904	human	Tumor only										4	4			9	6	-0.0426443	0	No	61	51.5163	No	proteincomplex;nucleus;nuclearenvelope;"GO:0005635,EXP"	NUCLEAR PORE COMPLEX PROTEIN NUP93.
GOLGA3	IPI00305267 ; IPI00333419 ; IPI00654805	human	Tumor only										12	8			2	2			No	104.333	57.3013	No	cell;proteincomplex;cytoplasm;Golgiapparatus;"GO:0005794,IDA;GO:0043234,IDA"	ISOFORM 1 OF GOLGIN SUBFAMILY A MEMBER 3.
SFRS11	IPI00464952 ; IPI00641287 ; IPI00641957	human	Tumor only										7	2							No	17.5	97.4146	No	nucleus; /// nucleus;"GO:0005634,IDA"	SPLICING FACTOR ARGININE/SERINE-RICH 11.
ACTA2	IPI00816229	human	Tumor only										334	13	1.51457	0.03	394	12	-0.400538	0.06	No	21	33.7094	Yes	cytoskeleton;cytoplasm;	ACTA2 PROTEIN (FRAGMENT).
TATDN1	IPI00012463 ; IPI00788602 ; IPI00795107	human	Tumor only										2	2	0.0144996	0					No	19	28.2962	Yes	nucleus;	ISOFORM 1 OF PUTATIVE DEOXYRIBONUCLEASE TATDN1.
GSTA4	IPI00005659 ; IPI00642343	human	Tumor only										8	5			1	1			No	13.5	51.0761	No	cytoplasm;	GLUTATHIONE S-TRANSFERASE A4.
PDIA4	IPI00009904	human	Tumor only										34	10			79	15	2.8365	0	No	48	44.4949	No	intracellular;organelle;endoplasmicreticulum;cytoplasmicmembrane-boundedvesicle;	PROTEIN DISULFIDE-ISOMERASE A4 PRECURSOR.
RBM4B	IPI00027838	human	Tumor only										7	4							No	23	48.3504	No	nucleus;	RNA-BINDING PROTEIN 4B.
PSMD9	IPI00010860 ; IPI00216220 ; IPI00791380	human	Tumor only										12	4	0.234465	0.09	5	3	0.304006	0.05	No	10.3333	63.4296	No	intracellular;proteincomplex;cytosol;nucleus; /// proteincomplex;cytosol;nucleus;intracellular;	ISOFORM P27-L OF 26S PROTEASOME NON-ATPASE REGULATORY SUBUNIT 9.
LRPAP1	IPI00026848	human	Tumor only										5	4			2	1			No	28	46.6535	No	cell;plasmamembrane;cytoplasm;endoplasmicreticulum;"GO:0005886,IDA"	ALPHA-2-MACROGLOBULIN RECEPTOR-ASSOCIATED PROTEIN PRECURSOR.
GART	IPI00025273 ; IPI00384624	human	Tumor only										14	5	-0.201634	0	7	3	-0.238787	0.01	No	38	15.2832	Yes	cytoplasm;cytosol;nucleus;mitochondrion;"GO:0005634,IDA;GO:0005739,IDA;GO:0005829,EXP"	ISOFORM LONG OF TRIFUNCTIONAL PURINE BIOSYNTHETIC PROTEIN ADENOSINE-3.
LCMT1	IPI00296370 ; IPI00414463 ; IPI00651717 ; IPI00872246	human	Tumor only										3	3							not annotated	23	42.5473	No		UNCHARACTERIZED PROTEIN LCMT1.
RUFY1	IPI00465429 ; IPI00744637 ; IPI00874125	human	Tumor only										2	2	0.0892673	0					No	57.5	51.6176	No	cell;endosome;cytoplasm;	ISOFORM 2 OF RUN AND FYVE DOMAIN-CONTAINING PROTEIN 1.
SACM1L	IPI00022275	human	Tumor only										4	3			2	2			No	34	37.3686	Yes	cell;endoplasmicreticulum;Golgiapparatus;"GO:0005794,IDA"	PHOSPHATIDYLINOSITIDE PHOSPHATASE SAC1.
NSF	IPI00006451 ; IPI00787942	human	Tumor only										3	3			2	2			No	50	37.7815	No	cytoplasm;	VESICLE-FUSING ATPASE.
CCBL2	IPI00061178	human	Tumor only										26	7							not annotated	43	61.631	No		KYNURENINE AMINOTRANSFERASE III ISOFORM 3.
DBI	IPI00010182 ; IPI00218836 ; IPI00815745	human	Tumor only										38	4			13	3			not annotated	8	33.6183	Yes		ISOFORM A 1 OF ACYL-COA-BINDING PROTEIN.
LGALS3BP	IPI00023673	human	Tumor only										78	11	0.514573	0.09	51	11	0.556393	0.05	Yes	32	38.9056	Yes	extracellularspace;extracellularregion;proteinaceousextracellularmatrix;cell;nucleus;"GO:0005634,IDA"	GALECTIN-3-BINDING PROTEIN PRECURSOR.
C19orf10	IPI00056357	human	Tumor only										3	2			4	2			Yes	8	41.078	No	extracellularregion;cytoplasm;	UPF0556 PROTEIN C19ORF10 PRECURSOR.
	IPI00385143	human	Tumor only										10	2			10	2			No	6	41.8208	No	cellular_component;	MICROFIBRILLAR PROTEIN 2 (FRAGMENT).
NUP205	IPI00783781	human	Tumor only														2	2			No	113	52.6041	No	proteincomplex;nucleus;nuclearenvelope;"GO:0005635,EXP"	NUCLEAR PORE COMPLEX PROTEIN NUP205.
RPL10	IPI00853485	human	Tumor only										19	2	0.577767	0.04	17	1	0.251539	0.05	No	12	52.0707	No	intracellular;ribosome;	RIBOSOMAL PROTEIN L10.
KLK6	IPI00023845	human	Tumor only										16	6	1.12029	0.01	6	3	-0.378512	0.09	Yes	14	36.384	Yes	extracellularregion;cell;cytoplasm;endoplasmicreticulum;nucleus;mitochondrion;"GO:0005576,IDA;GO:0005737,IDA"	KALLIKREIN-6 PRECURSOR.
HMG1L1	IPI00022796	human	Tumor only														31	4			No	14	48.1465	No	nucleus;chromosome;	HIGH-MOBILITY GROUP (NONHISTONE CHROMOSOMAL) PROTEIN 1-LIKE 1.
AGPS	IPI00010349	human	Tumor only														8	5	0	0	No	46	34.0626	Yes	cell;cytosol;peroxisome;"GO:0005777,IDA;GO:0005829,EXP"	ALKYLDIHYDROXYACETONEPHOSPHATE SYNTHASE, PEROXISOMAL PRECURSOR.
MATR3	IPI00017297 ; IPI00789551	human	Tumor only										47	12	-0.163499	0.12	25	8	-0.378512	0	No	56.5	52.9073	No	intracellular;nucleus;nuclearenvelope; /// nucleus;	MATRIN-3.
TPM1	IPI00442894	human	Tumor only										12	5			43	8			not annotated	23	33.5645	Yes		CDNA FLJ26372 FIS, CLONE HRT06233.
PRPSAP2	IPI00003168 ; IPI00796213	human	Tumor only										2	2			3	3			not annotated	25.5	43.2187	No		PHOSPHORIBOSYL PYROPHOSPHATE SYNTHETASE-ASSOCIATED PROTEIN 2.
COL18A1	IPI00022822 ; IPI00414694 ; IPI00783931	human	Tumor only														5	2			Yes	65.3333	44.4276	No	extracellularregion;proteinaceousextracellularmatrix;cytoplasm;nucleus;Golgiapparatus;"GO:0005634,IDA;GO:0005737,IDA;GO:0005794,IDA" /// proteinaceousextracellularmatrix;nucleus;extracellularregion;cytoplasm;Golgiapparatus;"GO:0005634,IDA;GO:0005737,IDA;G	ISOFORM 2 OF COLLAGEN ALPHA-1(XVIII) CHAIN PRECURSOR.
COX6B1	IPI00216085 ; IPI00797738	human	Tumor only										27	3	0.321928	0.02	10	2	0.200913	0.03	No	8.5	30.3779	Yes	mitochondrion;	CYTOCHROME C OXIDASE SUBUNIT VIB ISOFORM 1.
WDR44	IPI00444371 ; IPI00639995 ; IPI00872729	human	Tumor only										2	2							No	68.5	48.1083	No	cell;endosome;cytoplasm;Golgiapparatus;	ISOFORM 1 OF WD REPEAT-CONTAINING PROTEIN 44.
BCL7C	IPI00006266 ; IPI00447051 ; IPI00449172	human	Tumor only										2	2							not annotated	13.3333	65.6754	No		ISOFORM 1 OF B-CELL CLL/LYMPHOMA 7 PROTEIN FAMILY MEMBER C.
COMT	IPI00011284 ; IPI00375513	human	Tumor only										16	6	0.0144996	0.08	21	5	0.514573	0.09	No	14.5	26.2244	Yes	intracellular;organelle;plasmamembrane;cytoplasm;cell;cytosol;"GO:0005829,EXP;GO:0043226,IDA;GO:0005622,IDA" /// plasmamembrane;cell;cytosol;intracellular;organelle;cytoplasm;"GO:0005829,EXP;GO:0043226,IDA;GO:0005622,IDA"	ISOFORM MEMBRANE-BOUND OF CATECHOL O-METHYLTRANSFERASE.
MAP2K1IP1	IPI00030919	human	Tumor only										2	2							No	9	31.0944	Yes	cell;endosome;	MITOGEN-ACTIVATED PROTEIN KINASE KINASE 1-INTERACTING PROTEIN 1.
	IPI00335001 ; IPI00395462	human	Tumor only										10	4							not annotated	9.5	60.4457	No		ISOFORM 1 OF HUNTINGTIN-INTERACTING PROTEIN K.
	IPI00397609 ; IPI00790711	human	Tumor only										20	4			3	2			not annotated	13.5	30.6737	Yes		SIMILAR TO RIBOSOMAL PROTEIN.
DSC2	IPI00025846 ; IPI00220146	human	Tumor only										113	13	1	0.1	79	12	0.621488	0.05	No	46.5	35.8025	Yes	cell;plasmamembrane;	ISOFORM 2A OF DESMOCOLLIN-2 PRECURSOR.
DES	IPI00465084	human	Tumor only										8	5	0.395929	0.02	13	4	0.200913	0.12	No	43	51.3115	No	plasmamembrane;cell;cytoskeleton;cellular_component;cytoplasm;"GO:0005737,IDA"	DESMIN.
ACSL1	IPI00012728 ; IPI00401448	human	Tumor only														2	2			No	40.5	34.8202	Yes	cell;cytosol;endoplasmicreticulum;mitochondrion;peroxisome;"GO:0005829,EXP" /// cell;cytosol;mitochondrion;endoplasmicreticulum;peroxisome;"GO:0005829,EXP"	ISOFORM 1 OF LONG-CHAIN-FATTY-ACID--COA LIGASE 1.
NDUFB9	IPI00255052 ; IPI00790064 ; IPI00790752	human	Tumor only										5	3	-0.389567	0.03	2	2			No	14.3333	56.2091	No	cell;proteincomplex;mitochondrion; /// mitochondrion;	NADH DEHYDROGENASE [UBIQUINONE] 1 BETA SUBCOMPLEX SUBUNIT 9.
EPHX2	IPI00104341	human	Tumor only										4	4			2	2	1	0.04	No	34	44.6596	No	cell;cytosol;cytoplasm;peroxisome;	EPOXIDE HYDROLASE 2.
KLK7	IPI00028600	human	Tumor only										13	6	0.862496	0.03	10	4	-0.526069	0.12	Yes	13	31.0095	Yes	extracellularregion;	ISOFORM 1 OF KALLIKREIN-7 PRECURSOR.
GSTM3	IPI00246975 ; IPI00845493	human	Tumor only										5	4	0.152003	0					No	20.5	32.7481	Yes	cytoplasm;	GLUTATHIONE S-TRANSFERASE MU 3.
PDCD10	IPI00298558 ; IPI00793671	human	Tumor only										2	2			4	1			not annotated	9.5	31.6808	Yes		PROGRAMMED CELL DEATH PROTEIN 10.
SOAT1	IPI00644020 ; IPI00745125	human	Tumor only										3	3	0.168123	0	1	1			No	22.5	36.7094	Yes	cell; /// cell;endoplasmicreticulum;"GO:0005623,IDA"	STEROL O-ACYLTRANSFERASE (ACYL-COENZYME A: CHOLESTEROL ACYLTRANSFERASE) 1.
ALDH18A1	IPI00008982 ; IPI00218547	human	Tumor only										7	5			7	3			No	48.5	39.7056	Yes	cell;cytoplasm;mitochondrion; /// cell;mitochondrion;cytoplasm;	ISOFORM LONG OF DELTA-1-PYRROLINE-5-CARBOXYLATE SYNTHETASE.
ECH1	IPI00011416	human	Tumor only										30	8	-0.137504	0.03	26	6			No	27	42.9988	No	mitochondrion;peroxisome;	DELTA(3,5)-DELTA(2,4)-DIENOYL-COA ISOMERASE, MITOCHONDRIAL PRECURSOR.
MAP7	IPI00020771 ; IPI00022628 ; IPI00797162 ; IPI00874277	human	Tumor only										12	7	0.643856	0.06	2	1			No	48	70.9816	No	plasmamembrane;cytoplasm;proteincomplex;cytoskeleton; /// plasmamembrane;proteincomplex;cytoskeleton;cytoplasm;	ISOFORM 3 OF ENSCONSIN.
PGRMC1	IPI00220739	human	Tumor only										11	2			8	3			No	11	44.7395	No	plasmamembrane;cell;nucleolus;nucleus;endoplasmicreticulum;"GO:0005634,IDA;GO:0005730,IDA;GO:0005623,IDA"	MEMBRANE-ASSOCIATED PROGESTERONE RECEPTOR COMPONENT 1.
AP1M2	IPI00002552 ; IPI00219794	human	Tumor only														3	2			No	35	38.9948	Yes	organelle;cytoplasm;cell;proteincomplex;cytosol;Golgiapparatus;"GO:0005829,EXP" /// cell;proteincomplex;cytosol;organelle;cytoplasm;Golgiapparatus;"GO:0005829,EXP"	ISOFORM 1 OF AP-1 COMPLEX SUBUNIT MU-2.
PCBP3	IPI00027970 ; IPI00101278 ; IPI00167750 ; IPI00410586 ; IPI00410587 ; IPI00550365	human	Tumor only										6	2	-0.0143553	0.01					No	19	37.4427	Yes	nucleus;intracellular;cytoplasm;"GO:0005634,IDA;GO:0005737,IDA"	ISOFORM 1 OF POLY(RC)-BINDING PROTEIN 3.
FAM21B;FAM21A;FAM21C;FAM21D;FAM21C;FAM21D	IPI00241409 ; IPI00294810 ; IPI00456853 ; IPI00470523 ; IPI00514705 ; IPI00556261 ; IPI00745075 ; IPI00792422 ; IPI00797872 ; IPI00871172 ; IPI00884375	human	Tumor only										5	3			2	1			not annotated	51.4444	49.3864	No		FAMILY WITH SEQUENCE SIMILARITY 21, MEMBER B.
LPCAT2	IPI00016418 ; IPI00643943	human	Tumor only										2	1			4	3	0.621488	0	No	25.5	40.9748	No	cell;endoplasmicreticulum;Golgiapparatus;	ISOFORM 1 OF LYSOPHOSPHATIDYLCHOLINE ACYLTRANSFERASE 2.
ALDH1B1	IPI00103467	human	Tumor only														4	4	0.454032	0	No	30	22.5973	Yes	mitochondrion;	ALDEHYDE DEHYDROGENASE X, MITOCHONDRIAL PRECURSOR.
NUP50	IPI00026940 ; IPI00170581	human	Tumor only										8	4	-0.0143553	0.06	1	1			No	31.5	42.4814	No	cell;nucleoplasm;proteincomplex;nucleus;nuclearenvelope;"GO:0005654,EXP" /// cell;	NUCLEOPORIN 50 KDA.
AK3	IPI00465256 ; IPI00478236	human	Tumor only										4	4			1	1			No	15.5	33.0467	Yes	mitochondrion;	GTP:AMP PHOSPHOTRANSFERASE MITOCHONDRIAL.
PRCC	IPI00294618 ; IPI00399306 ; IPI00514697	human	Tumor only										3	2			1	1			No	19.5	64.2399	No	cellular_component;	PROLINE-RICH PROTEIN PRCC.
EIF4EBP2	IPI00002570	human	Tumor only										2	2	0.915936	0.01					not annotated	7	57.34	No		EUKARYOTIC TRANSLATION INITIATION FACTOR 4E-BINDING PROTEIN 2.
COX5B	IPI00021785	human	Tumor only										9	2	0.120294	0.07	5	1			No	11	43.0589	No	cell;mitochondrion;	CYTOCHROME C OXIDASE SUBUNIT 5B, MITOCHONDRIAL PRECURSOR.
PDLIM5	IPI00007935 ; IPI00103146	human	Tumor only										15	4			12	6			No	24.5	43.3977	No	cytoplasm;cell;cytosol;cytoskeleton;"GO:0005856,IDA" /// cell;cytosol;	PDZ AND LIM DOMAIN PROTEIN 5.
AGA	IPI00026259	human	Tumor only										4	2			1	1			No	17	32.4465	Yes	lysosome;	N.
CP	IPI00017601 ; IPI00793108 ; IPI00793626 ; IPI00794184	human	Tumor only										10	2	-1.1177	0.08	16	1			Yes	35	39.0629	No	extracellularspace;extracellularregion;	CERULOPLASMIN PRECURSOR.
GARS	IPI00465260 ; IPI00783097	human	Tumor only										24	8	-0.15056	0.04	47	11	-0.0840643	0.05	No	57.5	48.328	No	cell;cytoplasm;cytoplasmicmembrane-boundedvesicle;	85 KDA PROTEIN.
HSPA2	IPI00007702	human	Tumor only										132	21	0.184425	0.31	142	17	0.761213	0	No	43	34.7542	Yes	cell;cytoplasm;nucleus;mitochondrion;"GO:0005634,IDA;GO:0005737,IDA;GO:0005623,IDA"	HEAT SHOCK-RELATED 70 KDA PROTEIN 2.
HADHA	IPI00031522	human	Tumor only										48	18	-0.799087	0.4	46	16	0.104697	0.04	No	53	32.8131	Yes	proteincomplex;mitochondrion;	TRIFUNCTIONAL ENZYME SUBUNIT ALPHA, MITOCHONDRIAL PRECURSOR.
TRIM25	IPI00029629	human	Tumor only										5	2	0.514573	0.05	1	1	0.761213	0	No	42	53.9618	No	plasmamembrane;nucleus;cytoplasm;"GO:0005634,IDA;GO:0005886,IDA;GO:0005886,IDA"	TRIPARTITE MOTIF-CONTAINING PROTEIN 25.
TXNDC4	IPI00401264	human	Tumor only										20	10	-0.111031	0.05	13	3	0.168123	0.06	No	24	39.2705	Yes	intracellular;organelle;cytoplasm;endoplasmicreticulum;"GO:0043226,IDA;GO:0005622,IDA;GO:0005783,IDA;GO:0005737,IDA"	THIOREDOXIN DOMAIN-CONTAINING PROTEIN 4 PRECURSOR.
CSRP1	IPI00442073 ; IPI00556095	human	Tumor only										40	7	0.736966	0.07	23	3	0.494109	0.01	No	16	22.288	Yes	nucleus;	CYSTEINE AND GLYCINE-RICH PROTEIN 1.
PRRC1	IPI00217053 ; IPI00386206 ; IPI00744319 ; IPI00868717 ; IPI00868764 ; IPI00868973	human	Tumor only										3	3			1	1			No	14	45.701	No	Golgiapparatus;	ISOFORM 3 OF PROTEIN PPRC1.
TUBA1A	IPI00180675	human	Tumor only										295	17	0.268817	0.25					No	23	35.9253	Yes	proteincomplex;cytoskeleton;	TUBULIN ALPHA-1A CHAIN.
CCT4	IPI00302927 ; IPI00873222 ; IPI00893358	human	Tumor only										36	9	0.473931	0.26	34	10	-0.31034	0	No	36	36.6523	Yes	proteincomplex;cytosol;cytoplasm;cytoplasmicmembrane-boundedvesicle; /// proteincomplex;cytosol;cytoplasm;	T-COMPLEX PROTEIN 1 SUBUNIT DELTA.
ACLY	IPI00021290 ; IPI00394838	human	Tumor only										49	15	0.0892673	0.02	41	17	0.0144996	0.04	No	68.5	31.5445	Yes	cytoplasm;proteincomplex;cytosol;"GO:0005829,EXP"	ATP-CITRATE SYNTHASE.
TRIM28	IPI00438229 ; IPI00438230	human	Tumor only										10	7	0.599462	0					No	36.5	46.4315	No	nucleus;chromosome;intracellular;	ISOFORM 1 OF TRANSCRIPTION INTERMEDIARY FACTOR 1-BETA.
CLTB	IPI00014589 ; IPI00216472	human	Tumor only										2	2							No	10	57.8646	No	organelle;plasmamembrane;cytoplasm;cell;proteincomplex;cytoplasmicmembrane-boundedvesicle;Golgiapparatus; /// plasmamembrane;cell;proteincomplex;organelle;cytoplasm;cytoplasmicmembrane-boundedvesicle;Golgiapparatus;	ISOFORM BRAIN OF CLATHRIN LIGHT CHAIN B.
RAB21	IPI00007755 ; IPI00790578	human	Tumor only										7	5	0.785875	0.11	6	3	-0.0143553	0.03	No	10.5	42.624	No	endosome;cell;Golgiapparatus;"GO:0005768,IDA"	RAS-RELATED PROTEIN RAB-21.
RPS24	IPI00029750 ; IPI00847986	human	Tumor only										37	3			18	3			No	9	22.7466	Yes	cytosol;nucleus;intracellular;ribosome;cytoplasm;"GO:0005634,IDA;GO:0005737,IDA;GO:0005829,EXP;GO:0005840,IDA;GO:0005829,IDA;GO:0005840,IDA;GO:0005829,IDA"	ISOFORM 1 OF 40S RIBOSOMAL PROTEIN S24.
TXNL1	IPI00305692 ; IPI00642032	human	Tumor only										10	7	0.473931	0.05	10	4	-0.111031	0.01	No	17	37.7921	No	cytoplasm;"GO:0005737,IDA"	THIOREDOXIN-LIKE PROTEIN 1.
IPO7	IPI00007402	human	Tumor only										26	11	0.0892673	0.11	31	12	0.168123	0.21	No	53	47.1642	No	cytoplasm;cell;proteincomplex;nucleus;nuclearenvelope;	IMPORTIN-7.
GNS	IPI00012102	human	Tumor only										2	2							No	28	41.1089	No	lysosome;	N-ACETYLGLUCOSAMINE-6-SULFATASE PRECURSOR.
COPB1	IPI00295851	human	Tumor only										26	11	0.577767	0.16	34	14	0.494109	0.05	No	68	37.8092	Yes	cell;proteincomplex;cytosol;organelle;cytoplasm;cytoplasmicmembrane-boundedvesicle;Golgiapparatus;"GO:0005829,EXP;GO:0005829,EXP"	COATOMER SUBUNIT BETA.
MYO1C	IPI00010418 ; IPI00743335 ; IPI00791026 ; IPI00829992	human	Tumor only										10	4			9	5			No	70.75	49.3897	No	intracellular;organelle;plasmamembrane;cell;cytoplasm;proteincomplex;cytoskeleton;"GO:0005737,IDA;GO:0005886,IDA;GO:0005886,IDA;GO:0005856,IDA;GO:0043234,IDA" /// cell;proteincomplex;cytoskeleton;intracellular;organelle;	MYOSIN-IC.
C14orf172	IPI00059718 ; IPI00177856 ; IPI00783197	human	Tumor only										2	2			3	3			No	17.3333	29.8879	Yes	nucleus;	C14ORF172 PROTEIN (FRAGMENT).
KIAA0664	IPI00024425	human	Tumor only										2	2	0.251539	0	1	1			not annotated	84	47.9701	No		PUTATIVE EUKARYOTIC TRANSLATION INITIATION FACTOR 3 SUBUNIT.
RBM22	IPI00019046	human	Tumor only										3	2							No	29	47.0305	No	nucleus;"GO:0005634,IDA;GO:0005634,IDA"	PRE-MRNA-SPLICING FACTOR RBM22.
EPS15	IPI00292134 ; IPI00385325 ; IPI00873475	human	Tumor only										7	7			1	1			No	53.5	47.8629	No	plasmamembrane;cytosol;cytoplasm;"GO:0005829,EXP;GO:0005829,EXP;GO:0005829,EXP;GO:0005886,IDA"	EPIDERMAL GROWTH FACTOR RECEPTOR SUBSTRATE 15.
HUWE1	IPI00179298 ; IPI00445401 ; IPI00456919 ; IPI00643153	human	Tumor only										8	5	-0.226509	0	7	5	0.104697	0	No	231.5	54.4668	No	nucleus;intracellular;cytoplasm;	482 KDA PROTEIN.
	IPI00032849 ; IPI00784265	human	Tumor only										5	3							No	16	58.0601	No	nucleus;	UPF0384 PROTEIN CGI-117.
HNRNPD	IPI00028888 ; IPI00220684	human	Tumor only										60	9	0.415037	0.23	61	9	0.473931	0.11	No	20.5	38.9899	No	nucleus;chromosome;	ISOFORM 1 OF HETEROGENEOUS NUCLEAR RIBONUCLEOPROTEIN D0.
CHMP4B	IPI00025974	human	Tumor only										9	4			4	1			No	14	47.8938	No	cytoplasm;	CHARGED MULTIVESICULAR BODY PROTEIN 4B.
PIN1	IPI00013723 ; IPI00644298	human	Tumor only										9	3	0.556393	0	1	1			No	7.5	64.627	No	nucleus;	PEPTIDYL-PROLYL CIS-TRANS ISOMERASE NIMA-INTERACTING 1.
EIF2B1	IPI00221300 ; IPI00783880	human	Tumor only										1	1			3	3	1.4344	0	No	17	30.4866	Yes	plasmamembrane;cell;proteincomplex;cytoplasm;"GO:0005623,IDA;GO:0005737,IDA;GO:0005737,IDA;GO:0043234,IDA;GO:0005737,IDA;GO:0043234,IDA;GO:0005886,IDA"	TRANSLATION INITIATION FACTOR EIF-2B SUBUNIT ALPHA.
CAPZA2	IPI00026182 ; IPI00852796 ; IPI00853571 ; IPI00873113	human	Tumor only										13	3			7	5	-0.555816	0	No	15.5	30.2483	Yes	cytoplasm;proteincomplex;cytoskeleton;"GO:0005737,IDA" /// proteincomplex;cytoskeleton;cytoplasm;"GO:0005737,IDA"	F-ACTIN-CAPPING PROTEIN SUBUNIT ALPHA-2.
ADAM10	IPI00013897 ; IPI00794448	human	Tumor only										13	8	0.152003	0.09	2	1	0.304006	0	No	44.5	37.8207	Yes	cell;plasmamembrane;cytoplasm;nucleus;cytoplasmicmembrane-boundedvesicle;Golgiapparatus;"GO:0005794,IDA;GO:0016023,IDA;GO:0005794,IDA;GO:0005623,IDA"	ADAM 10 PRECURSOR.
CISD2	IPI00166865	human	Tumor only										7	3	-0.411426	0.01	5	3	-0.400538	0	No	10	61.6015	No	cell;proteincomplex;mitochondrion;endoplasmicreticulum;"GO:0043234,IDA"	CDGSH IRON SULFUR DOMAIN-CONTAINING PROTEIN 2.
KLC1;KLC2	IPI00020096 ; IPI00337460 ; IPI00337465 ; IPI00394906 ; IPI00397666 ; IPI00398708 ; IPI00412642 ; IPI00472303 ; IPI00479424 ; IPI00791952 ; IPI00793175	human	Tumor only										5	5	0.217591	0	3	3			No	39.25	44.5383	No	organelle;cell;cytoplasm;proteincomplex;cytosol;cilium;cytoskeleton; /// cell;proteincomplex;cytosol;cytoskeleton;organelle;cytoplasm;cilium; /// proteincomplex;cytoskeleton;	KINESIN LIGHT CHAIN 1 ISOFORM 2.
NIPSNAP3A	IPI00004845 ; IPI00745420 ; IPI00871176	human	Tumor only										6	4			6	2			No	17.3333	36.9186	No	cytoplasm;	PROTEIN NIPSNAP HOMOLOG 3A.
PHF6	IPI00395568 ; IPI00397700 ; IPI00552149	human	Tumor only										5	4	0.0740006	0.02	4	2	0.200913	0.04	No	22	56.8792	No	nucleolus;nucleus;"GO:0005730,IDA" /// nucleolus;nucleus;"GO:0005634,IDA;GO:0005730,IDA"	ISOFORM 1 OF PHD FINGER PROTEIN 6.
HNRNPL	IPI00027834 ; IPI00465225	human	Tumor only										49	11	0.120294	0.18	41	12	0.120294	0.11	No	25	46.0662	No	nucleoplasm;nucleus; /// nucleus;intracellular;	HETEROGENEOUS NUCLEAR RIBONUCLEOPROTEIN L ISOFORM A.
SH3GLB1	IPI00006558 ; IPI00022824	human	Tumor only										3	2			2	2			No	25	40.737	No	cell;cytoplasm;mitochondrion;Golgiapparatus;"GO:0005737,IDA"	ISOFORM 1 OF ENDOPHILIN-B1.
MRPL46	IPI00023161 ; IPI00383092 ; IPI00795938 ; IPI00796428 ; IPI00797042 ; IPI00797533 ; IPI00798240	human	Tumor only										1	1			26	3	0.454032	0	No	14.6667	22.3925	No	cellular_component;ribosome;mitochondrion;	39S RIBOSOMAL PROTEIN L46, MITOCHONDRIAL PRECURSOR.
PARP1	IPI00449049	human	Tumor only										10	5	-0.250962	0	19	7			No	70	37.2178	Yes	nucleolus;nucleus;nuclearenvelope;intracellular;"GO:0005635,IDA;GO:0005730,IDA;GO:0005730,IDA"	POLY [ADP-RIBOSE] POLYMERASE 1.
SEC61A1	IPI00218466	human	Tumor only										6	2	0.0588937	0.07	5	3	-0.321928	0.01	No	18	25.4471	Yes	cell;endoplasmicreticulum;	ISOFORM 1 OF PROTEIN TRANSPORT PROTEIN SEC61 SUBUNIT ALPHA ISOFORM 1.
COX5A	IPI00025086	human	Tumor only										25	3			35	3			No	12	46.1673	No	cell;mitochondrion;	CYTOCHROME C OXIDASE SUBUNIT 5A, MITOCHONDRIAL PRECURSOR.
TOMM70A	IPI00015602 ; IPI00791887	human	Tumor only										6	2	0.0892673	0.02	20	9	0.0439433	0.09	No	26.5	41.6077	No	cell;mitochondrion;	MITOCHONDRIAL PRECURSOR PROTEINS IMPORT RECEPTOR.
RPS18	IPI00013296	human	Tumor only										25	7			10	4			No	14	34.6658	Yes	intracellular;ribosome;cytoplasm;cytosol;"GO:0005829,EXP;GO:0005840,IDA;GO:0005829,IDA"	40S RIBOSOMAL PROTEIN S18.
SART1	IPI00021417	human	Tumor only										5	4			4	3			No	53	58.1627	No	cytoplasm;cytosol;nucleus;	U4/U6.U5 TRI-SNRNP-ASSOCIATED PROTEIN 1.
RBM7	IPI00001134 ; IPI00556348 ; IPI00747510	human	Tumor only										2	2			1	1			not annotated	12.5	34.3497	No		31 KDA PROTEIN.
DPYSL2	IPI00257508	human	Tumor only										11	8	0.888969	0	8	5			No	37	35.272	Yes	cell;mitochondrion;cytoskeleton;cytoplasm;"GO:0005856,IDA"	DIHYDROPYRIMIDINASE-RELATED PROTEIN 2.
H2AFY2	IPI00220994	human	Tumor only										7	3							No	23	44.9847	No	nucleus;chromosome;nuclearchromosome;"GO:0000228,IDA"	CORE HISTONE MACRO-H2A.2.
COPS8	IPI00009480 ; IPI00377080 ; IPI00872083	human	Tumor only										3	3			6	4			No	9	43.4062	No	cytoplasm;proteincomplex;nucleus;	COP9 SIGNALOSOME COMPLEX SUBUNIT 8.
EML2	IPI00015944 ; IPI00795173	human	Tumor only														4	4			No	30	27.931	Yes	cytoplasm;proteincomplex;cytoskeleton;	ECHINODERM MICROTUBULE-ASSOCIATED PROTEIN-LIKE 2.
VAPB	IPI00006211 ; IPI00748221	human	Tumor only										16	4			10	5	0.761213	0	No	12	40.0823	No	plasmamembrane;cell;endoplasmicreticulum;Golgiapparatus;"GO:0005783,IDA;GO:0005783,IDA;GO:0005783,IDA;GO:0005794,IDA"	ISOFORM 1 OF VESICLE-ASSOCIATED MEMBRANE PROTEIN-ASSOCIATED PROTEIN B/C.
ZNF326	IPI00373877 ; IPI00872597	human	Tumor only										4	4	0.434403	0.05	1	1			No	34.5	62.1136	No	nucleus;intracellular; /// nucleus;	ISOFORM 1 OF ZINC FINGER PROTEIN 326.
RPL24	IPI00306332 ; IPI00647337 ; IPI00791426 ; IPI00793696	human	Tumor only										32	4	0.434403	0.11	22	4	-0.15056	0.1	No	11	41.9376	No	cytosol;intracellular;ribosome;"GO:0005829,EXP" /// intracellular;ribosome;	60S RIBOSOMAL PROTEIN L24.
GDI2	IPI00031461 ; IPI00514395 ; IPI00640006 ; IPI00645255	human	Tumor only										93	14	-0.0703893	0.14	114	11	0.251539	0.04	No	22.5	29.5832	Yes	cell;cytoplasm;"GO:0005623,IDA"	RAB GDP DISSOCIATION INHIBITOR BETA.
ATP5J2	IPI00219291 ; IPI00220300 ; IPI00456013 ; IPI00719814 ; IPI00873259	human	Tumor only										5	2			4	1			No	5	27.5148	Yes	cell;proteincomplex;mitochondrion;intracellular;"GO:0043234,IDA;GO:0005739,IDA"	ISOFORM 2 OF ATP SYNTHASE SUBUNIT F, MITOCHONDRIAL.
RAB5C	IPI00016339 ; IPI00789439	human	Tumor only										5	2			3	2			No	13.5	25.4449	Yes	endosome;plasmamembrane;cytoplasm;nucleus;cytoplasmicmembrane-boundedvesicle;"GO:0005634,IDA;GO:0005737,IDA"	RAS-RELATED PROTEIN RAB-5C.
RPL12	IPI00024933	human	Tumor only										35	6	0.514573	0.09	53	6	0.0439433	0.11	No	12	46.9697	No	intracellular;ribosome;cytosol;"GO:0005829,EXP"	60S RIBOSOMAL PROTEIN L12.
TUBA4A	IPI00007750 ; IPI00794663	human	Tumor only										322	15	0.168123	0.22	360	15	0.0892673	0.16	No	23.5	38.0808	Yes	proteincomplex;cytoskeleton;	TUBULIN ALPHA-4A CHAIN.
RILPL1	IPI00478521 ; IPI00644941	human	Tumor only										2	2							No	31.5	52.3613	No	cytoplasm;	ISOFORM 1 OF RILP-LIKE PROTEIN 1.
DNM1L	IPI00037283 ; IPI00146935 ; IPI00235412 ; IPI00473085	human	Tumor only										31	15	-0.400538	0.03	48	18	-0.575312	0.16	No	55	49.8147	No	cell;cytoplasm;endoplasmicreticulum;Golgiapparatus;	ISOFORM 5 OF DYNAMIN-1-LIKE PROTEIN.
DRAP1	IPI00003084 ; IPI00477494	human	Tumor only										3	2							No	10.5	63.8659	No	intracellular;nucleus; /// nucleus;intracellular;	ISOFORM 1 OF DR1-ASSOCIATED COREPRESSOR.
TUBB2C	IPI00007752	human	Tumor only										319	18	0.268817	0.09	449	18	0.152003	0.06	No	21	37.804	Yes	cytoplasm;proteincomplex;cytoskeleton;	TUBULIN BETA-2C CHAIN.
MVK	IPI00010717 ; IPI00792046 ; IPI00793212	human	Tumor only										1	1	-0.250962	0	4	3			No	13.6667	33.8739	Yes	cytoplasm;peroxisome;	MEVALONATE KINASE.
HMGB3	IPI00744556	human	Tumor only										17	2	0.0144996	0.03					No	9	47.752	No	nucleus;chromosome;	PUTATIVE UNCHARACTERIZED PROTEIN DKFZP779G118 (FRAGMENT).
TIMM13	IPI00001589	human	Tumor only										8	3			2	2			No	7	32.2379	Yes	cell;proteincomplex;mitochondrion;	MITOCHONDRIAL IMPORT INNER MEMBRANE TRANSLOCASE SUBUNIT TIM13.
	IPI00013891 ; IPI00220447	human	Tumor only										3	2	1.55639	0	2	1			No	14.5	43.508	No	nucleus;"GO:0005634,IDA"	ISOFORM LONG OF TRANSFORMER-2 PROTEIN HOMOLOG.
GPD2	IPI00017895 ; IPI00719611	human	Tumor only										4	4			3	2	1.02915	0	No	50	41.9408	No	cytoplasm;proteincomplex;mitochondrion; /// proteincomplex;mitochondrion;cytoplasm;	ISOFORM 1 OF GLYCEROL-3-PHOSPHATE DEHYDROGENASE, MITOCHONDRIAL PRECURSOR.
AP2M1	IPI00022256 ; IPI00619900	human	Tumor only										4	2	0.321928	0.04	9	3	0.358454	0	No	33.5	40.6115	No	cytoplasm;plasmamembrane;proteincomplex;cytosol;mitochondrion;peroxisome;"GO:0005777,EXP;GO:0005829,EXP;GO:0005829,EXP;GO:0005829,EXP;GO:0005886,EXP;GO:0005886,EXP" /// plasmamembrane;proteincomplex;cytosol;mitochondrion;cytoplasm;peroxisome;"GO:0005777,E	AP-2 COMPLEX SUBUNIT MU-1.
NDUFV2	IPI00291328 ; IPI00412122 ; IPI00646556	human	Tumor only										5	2	0.234465	0.08	5	3	0.251539	0.03	No	17.5	44.0731	No	cell;proteincomplex;mitochondrion;	NADH DEHYDROGENASE [UBIQUINONE] FLAVOPROTEIN 2, MITOCHONDRIAL PRECURSOR.
PSMD6	IPI00014151 ; IPI00794344 ; IPI00794383 ; IPI00795037	human	Tumor only										5	4			5	4			No	25	36.2869	No	intracellular;cytosol;proteincomplex; /// proteincomplex;cytosol;	26S PROTEASOME NON-ATPASE REGULATORY SUBUNIT 6.
ABCE1	IPI00303207	human	Tumor only										27	7	0.168123	0.04	27	7	0.184425	0.06	No	44	33.9895	Yes	mitochondrion;cytoplasm;"GO:0005737,IDA;GO:0005739,IDA"	ATP-BINDING CASSETTE SUB-FAMILY E MEMBER 1.
OPA1	IPI00006721 ; IPI00107749 ; IPI00107750 ; IPI00107751 ; IPI00107752 ; IPI00107753 ; IPI00375149 ; IPI00375150 ; IPI00789199 ; IPI00797488 ; IPI00873022	human	Tumor only										2	2			3	3			No	82.3333	43.7582	No	cell;mitochondrion;"GO:0005739,IDA;GO:0005739,IDA"	ISOFORM 1 OF DYNAMIN-LIKE 120 KDA PROTEIN, MITOCHONDRIAL PRECURSOR.
OPRS1	IPI00218268 ; IPI00376226	human	Tumor only										3	2			3	2			No	6.5	34.0206	No	lipidparticle;cell;plasmamembrane;nucleus;nuclearenvelope;organelle;endoplasmicreticulum;	ISOFORM 1 OF SIGMA 1-TYPE OPIOID RECEPTOR.
TCEB2	IPI00026670 ; IPI00410162	human	Tumor only										1	1	0.494109	0	8	2	0.184425	0.03	No	8	61.8398	No	nucleoplasm;cytosol;nucleus;"GO:0005654,EXP;GO:0005829,EXP;GO:0005829,EXP"	TRANSCRIPTION ELONGATION FACTOR B POLYPEPTIDE 2.
YWHAQ	IPI00018146	human	Tumor only										65	10	-0.275007	0.06	116	7	0.104697	0.12	No	21	47.7665	No	microtubuleorganizingcenter;cytoplasm;nucleus;"GO:0005634,IDA;GO:0005815,IDA"	14-3-3 PROTEIN THETA.
RPL11	IPI00647168	human	Tumor only										27	4	0	0.06					No	10	29.0153	Yes	intracellular;ribosome;	RIBOSOMAL PROTEIN L11.
ARF6	IPI00215920	human	Tumor only										4	2	0.836501	0	1	1	0.535332	0	No	14	24.3029	Yes	plasmamembrane;cell;intracellular;endosome;cytoplasm;Golgiapparatus;"GO:0005623,IDA;GO:0005886,IDA;GO:0005737,IDA"	ADP-RIBOSYLATION FACTOR 6.
XPO1	IPI00298961 ; IPI00893013	human	Tumor only										23	13	0.0892673	0.04	21	8	0.0892673	0.03	No	65	41.5226	No	nucleoplasm;cell;cytosol;proteincomplex;nucleus;nuclearenvelope;cytoplasm;"GO:0005623,IDA;GO:0005654,EXP;GO:0005654,EXP;GO:0005829,EXP"	EXPORTIN-1.
FYTTD1	IPI00289907 ; IPI00552700	human	Tumor only										7	4	1.47393	0					not annotated	23	49.072	No		FORTY-TWO-THREE DOMAIN-CONTAINING PROTEIN 1.
ATP6V0A1	IPI00743576 ; IPI00791716 ; IPI00796045 ; IPI00892784	human	Tumor only										6	5	0.234465	0	9	8	-0.0703893	0.04	No	32.6667	41.1567	No	cell;organelle;cytoplasm;cytoplasmicmembrane-boundedvesicle;	ISOFORM 2 OF VACUOLAR PROTON TRANSLOCATING ATPASE 116 KDA SUBUNIT A ISOFORM 1.
PDIA3	IPI00893541	human	Tumor only										18	6	-0.226509	0.19	32	6	0.415037	0.12	not annotated	9	33.7309	Yes		14 KDA PROTEIN.
DNAJA3	IPI00179187 ; IPI00294610	human	Tumor only										3	2			3	3			No	27	43.4823	No	mitochondrion;"GO:0005739,IDA"	ISOFORM 2 OF DNAJ HOMOLOG SUBFAMILY A MEMBER 3, MITOCHONDRIAL PRECURSOR.
UBXD7	IPI00742124	human	Tumor only										5	4	-0.0976108	0					not annotated	30	63.2661	No		ISOFORM 1 OF UBX DOMAIN-CONTAINING PROTEIN 7.
NONO	IPI00304596 ; IPI00645010	human	Tumor only										47	12	0.37707	0.01	37	8	0.577767	0.03	No	28	64.4363	No	nucleus;	NON-POU DOMAIN-CONTAINING OCTAMER-BINDING PROTEIN.
EIF4E	IPI00027485 ; IPI00788723 ; IPI00873680	human	Tumor only										6	2							No	15	49.7461	No	proteincomplex;cytosol;cytoplasm;"GO:0005829,EXP;GO:0005829,EXP;GO:0005829,EXP;GO:0005829,EXP" /// cytoplasm;	EUKARYOTIC TRANSLATION INITIATION FACTOR 4E.
SPTBN1	IPI00005614 ; IPI00328230 ; IPI00871932	human	Tumor only										45	31	0.643856	0.08	37	17			No	178	47.8515	No	plasmamembrane;cytoplasm;nucleolus;nucleus;cytoskeleton;"GO:0005730,IDA;GO:0005737,IDA" /// plasmamembrane;nucleolus;nucleus;cytoskeleton;cytoplasm;"GO:0005730,IDA;GO:0005737,IDA"	ISOFORM LONG OF SPECTRIN BETA CHAIN, BRAIN 1.
SLC25A5	IPI00007188	human	Tumor only										45	9	-0.111031	0.05	38	7	0	0.04	No	25	16.4037	Yes	cell;plasmamembrane;mitochondrion;"GO:0005739,EXP"	ADP/ATP TRANSLOCASE 2.
;SPCS2	IPI00452747 ; IPI00472939	human	Tumor only										2	1			2	2	-0.137504	0	No	14.5	29.1713	Yes	cell;proteincomplex;endoplasmicreticulum;	SIMILAR TO SIGNAL PEPTIDASE COMPLEX SUBUNIT 2.
HIST1H2AB;HIST1H2AE;HIST3H2A	IPI00026272 ; IPI00031562	human	Tumor only										180	6			148	6			No	7	48.8385	No	nucleus;chromosome;	HISTONE H2A TYPE 1-B.
PPP2CA;PPP2CB	IPI00008380 ; IPI00429689 ; IPI00815784	human	Tumor only										13	4	0.0439433	0.19	8	5	0.321928	0.02	No	21	32.9175	Yes	intracellular;plasmamembrane;cytoplasm;cell;cytosol;nucleus;proteincomplex;mitochondrion;cytoskeleton; /// proteincomplex;intracellular;cytoplasm; /// plasmamembrane;cytosol;cytoplasm;	SERINE/THREONINE-PROTEIN PHOSPHATASE 2A CATALYTIC SUBUNIT ALPHA ISOFORM.
AHCY	IPI00012007	human	Tumor only										25	8	-0.0703893	0	50	8	-0.0840643	0.04	No	24	30.8486	Yes	cytoplasm;cytosol;cytoplasmicmembrane-boundedvesicle;	ADENOSYLHOMOCYSTEINASE.
TNN	IPI00010814 ; IPI00872178	human	Tumor only										4	2							Yes	84.5	36.2678	Yes	cellular_component;proteinaceousextracellularmatrix;cell;	TENASCIN-N PRECURSOR.
ADA	IPI00296441 ; IPI00872639	human	Tumor only										2	2			4	2			No	24.5	38.8074	Yes	cell;plasmamembrane;cytosol;lysosome;cytoplasm;"GO:0005764,IDA;GO:0005829,EXP;GO:0005886,IDA;GO:0005886,IDA;GO:0005623,IDA"	ADENOSINE DEAMINASE.
EEF2	IPI00186290	human	Tumor only										264	27	0.251539	0.09	418	28	-0.0143553	0.12	No	61	35.5825	Yes	cytoplasm;	ELONGATION FACTOR 2.
YLPM1	IPI00165434 ; IPI00181641 ; IPI00514265	human	Tumor only										4	3							No	110.667	73.5304	No	nucleoplasm;nucleus;cellular_component;	YLP MOTIF CONTAINING 1.
CSDA;YBX2	IPI00031801 ; IPI00219148 ; IPI00250153 ; IPI00555698	human	Tumor only										14	5			36	5			No	17.6667	35.3112	No	nucleus;cytoplasm; /// nucleus;	ISOFORM 1 OF DNA-BINDING PROTEIN A.
PCYT1A;PCYT1B	IPI00329338 ; IPI00640025 ; IPI00790032 ; IPI00791947	human	Tumor only										6	3			3	2			No	18.75	10.8723	Yes	cell;cytoplasm;endoplasmicreticulum; /// cytoplasm;endoplasmicreticulum;	CHOLINE-PHOSPHATE CYTIDYLYLTRANSFERASE A.
RGS10	IPI00013454 ; IPI00216532 ; IPI00643554	human	Tumor only										2	2	2.94342	0	1	1			not annotated	11	67.3798	No		ISOFORM 1 OF REGULATOR OF G-PROTEIN SIGNALING 10.
TIAL1;TIA1	IPI00005615 ; IPI00291398 ; IPI00333996 ; IPI00642600 ; IPI00644708 ; IPI00647436	human	Tumor only										5	5	0.473931	0.1	1	1	0.358454	0	No	21.4	30.5347	Yes	lysosome; /// cellular_component;	NUCLEOLYSIN TIAR.
RHOG	IPI00017342	human	Tumor only										4	2	0.0892673	0.02	2	2			No	13	51.0157	No	intracellular;plasmamembrane;	RHO-RELATED GTP-BINDING PROTEIN RHOG PRECURSOR.
HSPA9	IPI00007765	human	Tumor only										50	16	0.340075	0	68	17	-0.201634	0.04	No	51	38.1672	Yes	cell;cytoplasm;mitochondrion;"GO:0005623,IDA"	STRESS-70 PROTEIN, MITOCHONDRIAL PRECURSOR.
TROVE2	IPI00019450 ; IPI00642416 ; IPI00646322 ; IPI00646813	human	Tumor only										4	2			2	2			No	35	30.2944	Yes	intracellular;cytoplasm;nucleus;"GO:0005634,IDA" /// nucleus;intracellular;cytoplasm;"GO:0005634,IDA;GO:0005737,IDA"	ISOFORM LONG OF 60 KDA SS-A/RO RIBONUCLEOPROTEIN.
HPCA;HPCAL1	IPI00219103 ; IPI00219344 ; IPI00894533	human	Tumor only										3	3			2	2			not annotated	11	36.0415	No		NEURON-SPECIFIC CALCIUM-BINDING PROTEIN HIPPOCALCIN.
ACO1	IPI00008485	human	Tumor only										16	6			17	4			No	59	36.511	Yes	cytoplasm;cytosol;endoplasmicreticulum;Golgiapparatus;"GO:0005783,IDA;GO:0005794,IDA;GO:0005829,IDA"	IRON-RESPONSIVE ELEMENT-BINDING PROTEIN 1.
NRD1	IPI00243221 ; IPI00478723 ; IPI00513946 ; IPI00889668	human	Tumor only										5	3	0.0439433	0.04	7	5	0.0144996	0.04	No	48.3333	40.6542	No	cell;cytosol;	NARDILYSIN (N-ARGININE DIBASIC CONVERTASE) ISOFORM A.
SMARCC2	IPI00150057 ; IPI00216047	human	Tumor only										8	6	0.200913	0					No	63.5	53.8936	No	nucleoplasm;proteincomplex;nucleus;chromosome;intracellular;"GO:0005654,IDA;GO:0043234,IDA;GO:0005654,IPI;GO:0043234,IPI"	ISOFORM 2 OF SWI/SNF-RELATED MATRIX-ASSOCIATED ACTIN-DEPENDENT REGULATOR OF CHROMATIN SUBFAMILY C MEMBER 2.
HIST1H1C	IPI00217465	human	Tumor only										26	4			10	4			No	18	21.5657	Yes	nucleus;chromosome;	HISTONE H1.2.
RUVBL1	IPI00021187 ; IPI00788942 ; IPI00797004 ; IPI00798367	human	Tumor only										13	8	-0.214125	0.1	12	6	-0.250962	0.04	No	20.6667	31.1854	Yes	nucleoplasm;cell;cytoplasm;proteincomplex;nucleus;"GO:0005634,IDA;GO:0005654,IDA;GO:0043234,IDA" /// nucleoplasm;cell;proteincomplex;nucleus;cytoplasm;"GO:0005634,IDA;GO:0005654,IDA;GO:0043234,IDA"	ISOFORM 1 OF RUVB-LIKE 1.
TOM1	IPI00023191 ; IPI00871543	human	Tumor only										5	3			7	6			No	24	53.6686	No	cell;cytosol;intracellular;endosome;microtubuleorganizingcenter;cytoplasm;"GO:0005768,IDA;GO:0005815,IDA;GO:0005829,IDA;GO:0005623,IDA"	TARGET OF MYB1.
RBMS1;RBMS3	IPI00033611 ; IPI00102991 ; IPI00237654 ; IPI00298424 ; IPI00456051 ; IPI00472404 ; IPI00477694 ; IPI00827856 ; IPI00872052 ; IPI00872869 ; IPI00873101 ; IPI00873940 ; IPI00878483	human	Tumor only										5	2	0.971431	0.07					No	18.5714	42.9003	No	nucleus;cellular_component; /// nucleus; /// cytoplasm;	ISOFORM 2 OF RNA-BINDING MOTIF, SINGLE-STRANDED-INTERACTING PROTEIN 1.
UTP14A;UTP14C	IPI00107113 ; IPI00550793 ; IPI00607550 ; IPI00872922	human	Tumor only										3	2							No	47.6667	62.111	No	nucleus;intracellular; /// intracellular;	ISOFORM 1 OF U3 SMALL NUCLEOLAR RNA-ASSOCIATED PROTEIN 14 HOMOLOG A.
EIF4A1	IPI00025491 ; IPI00871852	human	Tumor only										95	12			88	12			No	27	46.117	No	cytoplasm;proteincomplex;cytosol;"GO:0005829,EXP;GO:0005829,EXP"	EUKARYOTIC INITIATION FACTOR 4A-I.
PPIH	IPI00007346 ; IPI00643915 ; IPI00645020	human	Tumor only										4	3							No	12.3333	17.7708	Yes	nucleoplasm;cytoplasm;nucleus;	PEPTIDYL-PROLYL CIS-TRANS ISOMERASE H.
RPL14	IPI00002821 ; IPI00069693 ; IPI00555744 ; IPI00815843	human	Tumor only										27	4	0.577767	0.11	17	3	-0.443607	0.11	No	16	28.9048	Yes	intracellular;ribosome;cytoplasm;cytosol;"GO:0005737,IDA;GO:0005829,EXP" /// intracellular;ribosome;cytoplasm;"GO:0005737,IDA" /// intracellular;ribosome;	60S RIBOSOMAL PROTEIN L14.
CPNE1	IPI00018452 ; IPI00640313 ; IPI00642168 ; IPI00642736 ; IPI00642976 ; IPI00643325 ; IPI00643422 ; IPI00644561 ; IPI00645270 ; IPI00645385 ; IPI00645712 ; IPI00646121 ; IPI00647692 ; IPI00852917 ; IPI00892994 ; IPI00894409	human	Tumor only										25	5	0.136062	0.03	22	5	0.120294	0.05	not annotated	15.5	30.8204	Yes		COPINE-1.
DHX15	IPI00396435	human	Tumor only										13	5	-0.0703893	0.05	10	5	-0.925999	0	No	48	42.5404	No	nucleus;"GO:0005634,IDA"	PUTATIVE PRE-MRNA-SPLICING FACTOR ATP-DEPENDENT RNA HELICASE DHX15.
C11orf58	IPI00003419	human	Tumor only										10	2			10	2			No	11	58.653	No	cellular_component;	SMALL ACIDIC PROTEIN.
MRRF	IPI00061108 ; IPI00412392 ; IPI00514034 ; IPI00555800 ; IPI00556454 ; IPI00556600	human	Tumor only										5	4	0.234465	0	1	1			No	17.8	41.0168	No	mitochondrion;	ISOFORM 1 OF RIBOSOME RECYCLING FACTOR, MITOCHONDRIAL PRECURSOR.
MOBKL1B;MOBKL1A	IPI00301518 ; IPI00386961 ; IPI00514212 ; IPI00872556 ; IPI00873106 ; IPI00879358	human	Tumor only										8	3			2	2			No	10	32.6129	No	nucleus;cytoplasm;"GO:0005634,IDA;GO:0005737,IDA"	ISOFORM 1 OF MPS ONE BINDER KINASE ACTIVATOR-LIKE 1B.
ZYX	IPI00020513 ; IPI00871311	human	Tumor only										6	3			8	3			No	25	62.9921	No	plasmamembrane;cytoplasm;nucleus;cytoskeleton;"GO:0005856,IDA;GO:0005886,IDA;GO:0005886,IDA" /// plasmamembrane;cytoplasm;"GO:0005737,IDA;GO:0005886,IDA"	ZYXIN.
EIF4G3	IPI00328268 ; IPI00646377 ; IPI00874215	human	Tumor only														9	5	0.268817	0.03	No	105.333	55.0294	No	proteincomplex;cytoplasm;	EIF4G3 PROTEIN.
C1orf128	IPI00015351 ; IPI00643524	human	Tumor only										2	1			3	3			not annotated	19	41.7782	No		ISOFORM 1 OF UPF0424 PROTEIN C1ORF128.
TALDO1	IPI00744692	human	Tumor only										44	7	0.454032	0.06	32	7	0.286304	0.03	No	26	34.9588	Yes	cytosol;cytoplasm;"GO:0005829,EXP"	TRANSALDOLASE.
RPN2	IPI00028635 ; IPI00383680 ; IPI00552146 ; IPI00552307 ; IPI00552972 ; IPI00844076 ; IPI00872681	human	Tumor only										20	8			37	11			No	24.8333	27.0589	Yes	proteincomplex;endoplasmicreticulum; /// cell;proteincomplex;endoplasmicreticulum;	RIBOPHORIN II.
UBE2L6	IPI00329563 ; IPI00386520 ; IPI00873585	human	Tumor only										7	3	0.415037	0	2	1			No	8	32.8195	Yes	cytoplasm;"GO:0005737,IDA"	UBIQUITIN-CONJUGATING ENZYME E2L 6 ISOFORM 1.
VANGL1	IPI00031195 ; IPI00386349	human	Tumor only										3	2			4	4			No	33.5	46.3573	No	cell;	ISOFORM 1 OF VANG-LIKE PROTEIN 1.
KCTD5	IPI00004506	human	Tumor only										2	2	0.217591	0					No	16	37.344	Yes	cell;plasmamembrane;cytoplasm;proteincomplex;nucleus;	BTB/POZ DOMAIN-CONTAINING PROTEIN KCTD5.
PRPF3	IPI00005861 ; IPI00377152	human	Tumor only										4	3	0.340075	0	1	1			No	45	48.0027	No	nucleoplasm;nucleus;	ISOFORM 1 OF U4/U6 SMALL NUCLEAR RIBONUCLEOPROTEIN PRP3.
ABLIM1	IPI00329495 ; IPI00455786 ; IPI00456617 ; IPI00514685 ; IPI00515115 ; IPI00644747 ; IPI00747332	human	Tumor only										8	4							No	55.3333	58.5654	No	cytoskeleton;cytoplasm;	ISOFORM 1 OF ACTIN-BINDING LIM PROTEIN 1.
PHLDA1	IPI00025463	human	Tumor only										2	2	0.340075	0					No	25	82.8784	No	organelle;cell;cytoplasm;nucleus;cytoplasmicmembrane-boundedvesicle;	PLECKSTRIN HOMOLOGY-LIKE DOMAIN, FAMILY A, MEMBER 1.
TMEM111	IPI00020472 ; IPI00607849 ; IPI00789434 ; IPI00790620	human	Tumor only														3	2			No	9.5	35.4833	No	cellular_component;cell;cytoplasmicmembrane-boundedvesicle;Golgiapparatus; /// cell;cellular_component;cytoplasmicmembrane-boundedvesicle;Golgiapparatus;	ISOFORM 1 OF TRANSMEMBRANE PROTEIN 111.
GIGYF2	IPI00647635 ; IPI00784233 ; IPI00815848 ; IPI00856036	human	Tumor only										4	3							not annotated	70.3333	79.9277	No		ISOFORM 3 OF PERQ AMINO ACID-RICH WITH GYF DOMAIN-CONTAINING PROTEIN 2.
PRKRA	IPI00021167 ; IPI00718940 ; IPI00719567	human	Tumor only										4	4	0.304006	0	2	2			No	18.3333	47.299	No	intracellular;cytoplasm;"GO:0005737,IDA"	ISOFORM 1 OF INTERFERON-INDUCIBLE DOUBLE STRANDED RNA-DEPENDENT PROTEIN KINASE ACTIVATOR A.
2010-09-05	IPI00017731 ; IPI00383573 ; IPI00789164 ; IPI00792072 ; IPI00879616	human	Tumor only										2	2			3	1			No	25.5	40.7479	No	cytoplasm;cell;plasmamembrane;proteincomplex;cytoplasmicmembrane-boundedvesicle;cytoskeleton;"GO:0005886,IDA;GO:0016023,IDA" /// plasmamembrane;proteincomplex;cytoskeleton;cytoplasm;cytoplasmicmembrane-boundedvesicle; /// proteincomplex;cytoskeleton;cytop	SEPTIN-5.
ARPC1A	IPI00333068	human	Tumor only										14	4	1.68966	0	1	1			No	26	33.6662	Yes	cytoskeleton;cytoplasm;	ACTIN-RELATED PROTEIN 2/3 COMPLEX SUBUNIT 1A.
ANXA5	IPI00329801 ; IPI00872379	human	Tumor only										53	13			99	15			No	29	32.5778	Yes	intracellular;cytoplasm;"GO:0005622,IDA"	ANNEXIN A5.
BCL10	IPI00022477	human	Tumor only										3	2							No	13	59.8189	No	intracellular;cell;plasmamembrane;lysosome;cytoplasm;proteincomplex;cytosol;nucleus;"GO:0005634,IDA;GO:0005737,IDA;GO:0005737,IDA;GO:0005737,IDA;GO:0005737,IDA;GO:0005764,IDA;GO:0005829,IDA;GO:0005829,EXP;GO:0005829,EXP;GO:0005829,EXP;GO:0043234,IDA;GO:00	B-CELL LYMPHOMA/LEUKEMIA 10.
STX7	IPI00289876 ; IPI00552913	human	Tumor only										8	4			1	1			No	17	46.515	No	cell;endosome;	ISOFORM 1 OF SYNTAXIN-7.
EDF1	IPI00006362 ; IPI00021570 ; IPI00640567	human	Tumor only										5	2			6	2			No	14.5	24.2568	Yes	intracellular;cytoplasm;nucleoplasm;proteincomplex;nucleus;"GO:0005634,IMP;GO:0005634,IDA;GO:0005654,IDA;GO:0043234,IDA;GO:0005737,IMP;GO:0005737,IDA"	ISOFORM 2 OF ENDOTHELIAL DIFFERENTIATION-RELATED FACTOR 1.
TM9SF3	IPI00030847 ; IPI00644458	human	Tumor only										2	2	-0.201634	0	3	3			No	18.5	30.0784	Yes	cell;	TRANSMEMBRANE 9 SUPERFAMILY MEMBER 3 PRECURSOR.
SNRP70	IPI00290204	human	Tumor only										2	1	-0.505891	0	4	3	-1.21412	0.02	No	24	79.5096	No	nucleus;"GO:0005634,IDA"	ISOFORM 1 OF U1 SMALL NUCLEAR RIBONUCLEOPROTEIN 70 KDA.
KIF5B;KIF5C;KIF5A	IPI00012837 ; IPI00028561 ; IPI00029722	human	Tumor only										20	9	0.268817	0	22	8	0.168123	0	No	75.3333	40.9563	No	cell;cytoplasm;proteincomplex;cilium;cytoskeleton; /// cell;proteincomplex;cytoskeleton;cytoplasm;cilium; /// cell;proteincomplex;nucleus;cytoskeleton;cytoplasm;cilium;"GO:0005634,IDA"	KINESIN-1 HEAVY CHAIN.
HM13	IPI00152441 ; IPI00220687 ; IPI00220688 ; IPI00329296 ; IPI00552772	human	Tumor only										3	2			5	2			No	13.5	36.108	No	cell;endoplasmicreticulum;	ISOFORM 1 OF MINOR HISTOCOMPATIBILITY ANTIGEN H13.
SFRS5	IPI00012341 ; IPI00413654 ; IPI00555857 ; IPI00867672	human	Tumor only										5	2			3	2			No	20	88.8825	No	nucleus;	ISOFORM SRP40-1 OF SPLICING FACTOR, ARGININE/SERINE-RICH 5.
SNX1	IPI00183274	human	Tumor only										14	6	0.0291463	0					not annotated	29	48.6875	No		SORTING NEXIN 1 ISOFORM C.
ATP5A1	IPI00440493	human	Tumor only										99	16	0.286304	0.08	129	17			No	41	30.8186	Yes	cell;plasmamembrane;proteincomplex;mitochondrion;intracellular;"GO:0043234,IDA;GO:0005739,IDA;GO:0005739,EXP;GO:0005886,IDA"	ATP SYNTHASE SUBUNIT ALPHA, MITOCHONDRIAL PRECURSOR.
TGFB1I1	IPI00396399 ; IPI00761017	human	Tumor only										3	2			1	1			No	24.5	58.2106	No	plasmamembrane;nucleus;cytoskeleton;intracellular;cytoplasm;"GO:0005622,IDA;GO:0005856,IDA"	ISOFORM 2 OF TRANSFORMING GROWTH FACTOR BETA-1-INDUCED TRANSCRIPT 1 PROTEIN.
SF3A2	IPI00017341	human	Tumor only										9	6	0.152003	0	4	2			No	16	73.3857	No	intracellular;nucleus;"GO:0005634,IDA"	SF3A2 PROTEIN (FRAGMENT).
PPIL1	IPI00007019	human	Tumor only														3	2			No	9	12.0211	Yes	nucleus;	PEPTIDYL-PROLYL CIS-TRANS ISOMERASE-LIKE 1.
RPS8	IPI00216587 ; IPI00872430	human	Tumor only										75	7	0.340075	0.13	59	8	-0.485427	0.15	No	14.5	50.1832	No	cytosol;intracellular;ribosome;"GO:0005829,EXP;GO:0005840,IDA;GO:0005829,IDA;GO:0005840,IDA;GO:0005829,IDA"	40S RIBOSOMAL PROTEIN S8.
IGHG2;IGHG4	IPI00399007 ; IPI00426051 ; IPI00550640 ; IPI00829814 ; IPI00830132	human	Tumor only														2	2			Yes	20.25	42.9815	No	cell;extracellularregion;	PUTATIVE UNCHARACTERIZED PROTEIN DKFZP686I04196 (FRAGMENT).
NDUFAB1	IPI00022442	human	Tumor only										5	2	-0.0976108	0.01	3	1	0.217591	0.01	No	10	31.2622	Yes	proteincomplex;mitochondrion;	ACYL CARRIER PROTEIN, MITOCHONDRIAL PRECURSOR.
ANXA8;ANXA8L1;ANXA8L2	IPI00218835 ; IPI00471941 ; IPI00872295	human	Tumor only														23	7			not annotated	30	41.2012	No		ANNEXIN A8.
SAP18	IPI00011698	human	Tumor only										6	3			6	2			No	15	42.9987	No	nucleoplasm;proteincomplex;	HISTONE DEACETYLASE COMPLEX SUBUNIT SAP18.
CCT3	IPI00290770 ; IPI00552715 ; IPI00553185	human	Tumor only										62	17	-0.111031	0.07	68	16	0.168123	0.39	No	39.5	43.8163	No	plasmamembrane;nucleus;cytoplasm;"GO:0005634,IDA;GO:0005886,IDA" /// plasmamembrane;nucleus;cytoskeleton;cytoplasm;"GO:0005634,IDA;GO:0005886,IDA"	CHAPERONIN CONTAINING TCP1, SUBUNIT 3 ISOFORM B.
UBE2V2	IPI00019600 ; IPI00797889	human	Tumor only										7	3			1	1			No	12.5	40.5879	No	intracellular;cytoplasm;proteincomplex;nucleus;"GO:0005634,IDA;GO:0005622,IDA;GO:0043234,IDA"	UBIQUITIN-CONJUGATING ENZYME E2 VARIANT 2.
DYNC1I2	IPI00216348 ; IPI00302712 ; IPI00744015	human	Tumor only														13	2			No	30.5	51.8904	No	proteincomplex;cytoskeleton;cytoplasm;	ISOFORM 2C OF CYTOPLASMIC DYNEIN 1 INTERMEDIATE CHAIN 2.
PSMC2	IPI00021435	human	Tumor only										8	2			7	3			No	37	40.06	No	intracellular;cytoplasm;cytosol;nucleus;proteincomplex;"GO:0005622,IDA;GO:0043234,IDA"	26S PROTEASE REGULATORY SUBUNIT 7.
RAB6A	IPI00023526 ; IPI00217943 ; IPI00748927	human	Tumor only										3	2			1	1			No	12.5	48.5135	No	cell;Golgiapparatus;"GO:0005794,IDA"	ISOFORM 1 OF RAS-RELATED PROTEIN RAB-6A.
CCT2	IPI00297779 ; IPI00791487	human	Tumor only										56	18	-0.111031	0.16	100	20	-0.0143553	0.12	No	27	31.5907	Yes	proteincomplex;cytosol;nucleus;cytoplasm;"GO:0005634,IDA"	T-COMPLEX PROTEIN 1 SUBUNIT BETA.
EIF5A2;EIF5A;EIF5AL1	IPI00006935 ; IPI00376005 ; IPI00411704 ; IPI00855924	human	Tumor only										106	5	0.0892673	0.09	72	5	0.168123	0.09	No	13	31.4353	Yes	cellular_component;cytosol;"GO:0005829,EXP" /// cell;cytosol;proteincomplex;nucleus;nuclearenvelope;cytoplasm;"GO:0005634,IDA;GO:0005634,IDA;GO:0005623,IDA;GO:0005635,IDA;GO:0043234,IDA;GO:0005737,IDA;GO:0005737,IDA;GO:0005829,EXP"	EUKARYOTIC TRANSLATION INITIATION FACTOR 5A-2.
2010-09-09	IPI00748715 ; IPI00784614 ; IPI00784808 ; IPI00784936	human	Tumor only										16	8	-0.226509	0.11	15	4			not annotated	38	62.2256	No		SEPT9 PROTEIN (FRAGMENT).
BOLA3	IPI00412229	human	Tumor only										6	2	-0.298658	0.02					No	10	50.2626	No	cellular_component;	BOLA-LIKE PROTEIN 3.
NPM1	IPI00220740 ; IPI00549248	human	Tumor only										73	5			77	5			No	16.5	51.3061	No	nucleolus;nucleus;microtubuleorganizingcenter;cytoplasm;"GO:0005634,IDA;GO:0005730,IDA;GO:0005730,IDA;GO:0005737,IDA;GO:0005815,IDA"	ISOFORM 2 OF NUCLEOPHOSMIN.
SDF2L1	IPI00106642	human	Tumor only										10	8			20	9			No	37	26.2557	Yes	cell;endoplasmicreticulum;	DIHYDROPYRIMIDINASE-LIKE 2.
OLA1	IPI00216106 ; IPI00290416	human	Tumor only										21	7	1.51457	0	22	6			No	24	30.3717	Yes	intracellular;cytoplasm;"GO:0005737,IDA"	ISOFORM 3 OF OBG-LIKE ATPASE 1.
DLAT	IPI00021338 ; IPI00604707 ; IPI00788836	human	Tumor only										6	3			7	3			No	34	46.2924	No	cytoplasm;proteincomplex;mitochondrion; /// proteincomplex;mitochondrion;cytoplasm; /// mitochondrion;	DIHYDROLIPOYLLYSINE-RESIDUE ACETYLTRANSFERASE COMPONENT OF PYRUVATE DEHYDROGENASE COMPLEX, MITOCHONDRIAL PRECURSOR.
DLST	IPI00384016 ; IPI00420108	human	Tumor only										12	6			8	6			No	20.5	48.9426	No	proteincomplex;nucleus;mitochondrion;intracellular;cytoplasm;"GO:0005634,IDA;GO:0005737,IDA;GO:0005739,EXP"	FULL-LENGTH CDNA 5-PRIME END OF CLONE CS0DJ009YL13 OF T CELLS (JURKAT CELL LINE) OF HOMO SAPIENS (FRAGMENT).
SERBP1	IPI00410693 ; IPI00470497	human	Tumor only										67	12			71	8			No	26.5	45.1381	No	nucleus;cytoplasm;	ISOFORM 1 OF PLASMINOGEN ACTIVATOR INHIBITOR 1 RNA-BINDING PROTEIN.
EHD2	IPI00100980	human	Tumor only										32	15	0.0892673	0.07	16	12	0.234465	0.05	No	41	37.7746	Yes	plasmamembrane;cell;nucleus;	EH DOMAIN-CONTAINING PROTEIN 2.
ACAA2	IPI00001539 ; IPI00873829	human	Tumor only										12	8	0.268817	0.02	20	8	0.621488	0.03	No	26.5	41.2947	No	mitochondrion;	3-KETOACYL-COA THIOLASE, MITOCHONDRIAL.
SORBS1	IPI00002491 ; IPI00010554 ; IPI00010555 ; IPI00064591 ; IPI00186452 ; IPI00306791 ; IPI00334908 ; IPI00383430 ; IPI00426075 ; IPI00454950 ; IPI00454951 ; IPI00513917 ; IPI00514261 ; IPI00514576 ; IPI00646306 ; IPI00654848 ; IPI00807389 ; IPI00873648	human	Tumor only										2	2							No	60.7333	52.8016	No	cell;plasmamembrane;cytoplasm;nucleus;cytoskeleton;"GO:0005634,IDA" /// cell;plasmamembrane;nucleus;cytoskeleton;cytoplasm;"GO:0005634,IDA"	ISOFORM 9 OF SORBIN AND SH3 DOMAIN-CONTAINING PROTEIN 1.
HSP90AA1	IPI00382470 ; IPI00784295	human	Tumor only										219	23	0.0588937	0.05	287	27	-0.0565835	0.08	No	50	41.9448	No	cytosol;cytoplasm;cytoplasmicmembrane-boundedvesicle;"GO:0005829,EXP;GO:0005829,EXP"	HEAT SHOCK PROTEIN 90KDA ALPHA (CYTOSOLIC), CLASS A MEMBER 1 ISOFORM 1.
DST	IPI00008756 ; IPI00217992 ; IPI00217993 ; IPI00217994 ; IPI00816460	human	Tumor only														4	3			Yes	237.8	46.1753	No	proteinaceousextracellularmatrix;plasmamembrane;cytoplasm;cytoplasmicmembrane-boundedvesicle;cytoskeleton;"GO:0005737,IDA;GO:0016023,IDA" /// proteinaceousextracellularmatrix;plasmamembrane;cytoskeleton;cytoplasm;cytoplasmicmembrane-boundedvesicle;"GO:000	ISOFORM 1 OF BULLOUS PEMPHIGOID ANTIGEN 1, ISOFORMS 1/2/3/4/5/8 (FRAGMENT).
BAX	IPI00071059 ; IPI00443773 ; IPI00444945 ; IPI00845474 ; IPI00885203	human	Tumor only										2	1			10	3			No	14	33.6925	No	cell;cytosol;mitochondrion;cytoplasm;"GO:0005739,IDA;GO:0005739,EXP;GO:0005829,IDA;GO:0005829,EXP"	ISOFORM EPSILON OF APOPTOSIS REGULATOR BAX.
CUL4A	IPI00419273 ; IPI00549919	human	Tumor only										5	5	0.304006	0	3	2	0.340075	0	No	60	39.2447	No	proteincomplex;intracellular;	ISOFORM 1 OF CULLIN-4A.
RPL37A	IPI00414860	human	Tumor only										21	3	0.340075	0.09	52	3	0.136062	0.19	No	6	38.3815	Yes	intracellular;ribosome;	60S RIBOSOMAL PROTEIN L37A.
CDC73	IPI00300659	human	Tumor only										1	1			10	2			No	45	45.6256	No	nucleus;	PARAFIBROMIN.
EFHD2	IPI00060181	human	Tumor only										6	4	0.136062	0	5	2			not annotated	17	49.3533	No		EF-HAND DOMAIN-CONTAINING PROTEIN D2.
RPL28	IPI00182533	human	Tumor only										14	4			12	4	-0.389567	0.08	No	14	65.5372	No	cytosol;intracellular;ribosome;"GO:0005829,EXP"	60S RIBOSOMAL PROTEIN L28.
APPL1	IPI00015836 ; IPI00794130 ; IPI00794687	human	Tumor only														2	2			No	22.5	35.2322	No	endosome;nucleoplasm;cell;cytoplasm;proteincomplex;nucleus;"GO:0005634,IDA;GO:0005654,IDA;GO:0043234,IDA"	DCC-INTERACTING PROTEIN 13-ALPHA.
CNN3	IPI00216682 ; IPI00873410	human	Tumor only										19	7	1.12029	0	4	3			No	24.5	38.893	No	cellular_component;	CALPONIN-3.
MCM6	IPI00031517	human	Tumor only										8	3			1	1			No	62	46.2004	No	nucleoplasm;nucleus;"GO:0005654,EXP;GO:0005654,EXP;GO:0005654,EXP;GO:0005654,EXP;GO:0005654,EXP;GO:0005654,EXP;GO:0005654,EXP"	DNA REPLICATION LICENSING FACTOR MCM6.
ACTN1	IPI00013508 ; IPI00759776	human	Tumor only										283	36	-0.250962	0.14	244	39	-0.0285692	0.12	No	67	41.7217	No	cell;plasmamembrane;cytoplasm;nucleolus;cytoskeleton;"GO:0005730,IDA;GO:0005886,IMP" /// nucleolus;cytoskeleton;"GO:0005730,IDA;GO:0005856,IDA"	ALPHA-ACTININ-1.
NAPA	IPI00009253	human	Tumor only										18	6			14	6	-0.214125	0	No	23	47.338	No	cell;endoplasmicreticulum;Golgiapparatus;	ALPHA-SOLUBLE NSF ATTACHMENT PROTEIN.
GNG12	IPI00221232	human	Tumor only										1	1			3	2	0.454032	0	No	5	56.9903	No	plasmamembrane;proteincomplex;	GUANINE NUCLEOTIDE-BINDING PROTEIN G(I)/G(S)/G(O) SUBUNIT GAMMA-12 PRECURSOR.
SNX5	IPI00295209 ; IPI00513893 ; IPI00515089	human	Tumor only										5	4	1.2863	0.08					not annotated	21	48.2657	No		SORTING NEXIN-5.
RBM25	IPI00004273	human	Tumor only										4	1			6	2			No	44	59.3008	No	cellular_component;	RNA BINDING MOTIF PROTEIN 25.
SNRPD1	IPI00302850	human	Tumor only										15	4			26	3			No	6	14.4462	Yes	nucleoplasm;cytosol;nucleus;cytoplasm;"GO:0005654,EXP;GO:0005829,EXP"	SMALL NUCLEAR RIBONUCLEOPROTEIN SM D1.
ATAD1	IPI00171445	human	Tumor only										3	2			1	1			not annotated	24	40.7961	No		ATPASE FAMILY AAA DOMAIN-CONTAINING PROTEIN 1.
FABP4;PMP2	IPI00215746 ; IPI00219533 ; IPI00872136	human	Tumor only										7	3			3	1			No	13	22.2235	Yes	cell;nucleus;cytoplasm;	FATTY ACID-BINDING PROTEIN, ADIPOCYTE.
STX5	IPI00386786 ; IPI00744834 ; IPI00784899 ; IPI00788072	human	Tumor only										9	4			2	2			No	21.25	61.0606	No	cell;proteincomplex;nucleus;organelle;cytoplasm;Golgiapparatus;"GO:0005634,IDA;GO:0005634,IDA;GO:0005794,IDA;GO:0005794,IDA"	ISOFORM 2 OF SYNTAXIN-5.
	IPI00249304 ; IPI00249305 ; IPI00736631	human	Tumor only										2	2							No	153	50.778	No	nucleus;intracellular;	ISOFORM 1 OF PEROXISOMAL PROLIFERATOR-ACTIVATED RECEPTOR A-INTERACTING COMPLEX 285 KDA PROTEIN.
ARCN1	IPI00298520 ; IPI00439944 ; IPI00514053	human	Tumor only										4	4	-0.0976108	0	3	2			No	23.5	43.2265	No	proteincomplex;cytoplasm; /// cell;proteincomplex;cytosol;organelle;cytoplasm;cytoplasmicmembrane-boundedvesicle;Golgiapparatus;"GO:0005829,EXP;GO:0005829,EXP"	PUTATIVE UNCHARACTERIZED PROTEIN DKFZP686M09245.
SYNJ2BP	IPI00299193	human	Tumor only										3	2							No	9	27.1241	Yes	cell;mitochondrion;	SYNAPTOJANIN-2-BINDING PROTEIN.
PTGES3	IPI00015029 ; IPI00789101 ; IPI00789698 ; IPI00790462	human	Tumor only										43	4	0.184425	0.13	32	4	0.358454	0.18	No	9.75	44.9618	No	cytoplasm;nucleus;chromosome;"GO:0005634,IDA"	PROSTAGLANDIN E SYNTHASE 3.
CNBP	IPI00430813 ; IPI00430814	human	Tumor only										23	5	0.810966	0.06	20	6	0.168123	0.06	No	14.5	49.3922	No	cytoplasm;endoplasmicreticulum;	ISOFORM 2 OF CELLULAR NUCLEIC ACID-BINDING PROTEIN.
RBM14	IPI00013174 ; IPI00556514	human	Tumor only										28	8	-0.189034	0.02	8	3	0.621488	0.01	No	22.5	41.535	No	intracellular;nucleoplasm;nucleus;proteincomplex;"GO:0005654,IPI;GO:0043234,IPI;GO:0005654,IPI;GO:0043234,IPI"	ISOFORM 1 OF RNA-BINDING PROTEIN 14.
TOP1	IPI00413611	human	Tumor only										6	4	-0.137504	0	2	1			No	58	45.7387	No	cell;nucleolus;nucleoplasm;nucleus;chromosome;cytoplasm;"GO:0005634,IDA;GO:0005654,IDA;GO:0005694,IDA;GO:0005730,IDA"	DNA TOPOISOMERASE 1.
RAN	IPI00643041 ; IPI00792352 ; IPI00795109 ; IPI00795671 ; IPI00796462	human	Tumor only										62	6	-0.214125	0.11	66	6	-0.163499	0.13	No	11.5	23.1787	Yes	nucleoplasm;cytosol;proteincomplex;nucleus;nuclearenvelope;chromosome;cytoplasm;cytoplasmicmembrane-boundedvesicle;"GO:0005694,IDA;GO:0005654,EXP;GO:0005654,EXP;GO:0005737,IDA;GO:0005829,EXP"	GTP-BINDING NUCLEAR PROTEIN RAN.
EZR	IPI00746388 ; IPI00843975 ; IPI00872684	human	Tumor only										168	17	0.0144996	0.04	112	16	0.168123	0.05	No	47	53.6118	No	plasmamembrane;cell;cytoskeleton;microtubuleorganizingcenter;cytoplasm; /// plasmamembrane;cell;cytosol;cytoskeleton;cytoplasm;"GO:0005623,IDA;GO:0005829,IDA;GO:0005856,IDA;GO:0005623,IDA;GO:0005623,IDA"	EZRIN.
EHD1	IPI00017184 ; IPI00657915	human	Tumor only										21	14	0.37707	0	14	11	0.0588937	0.01	No	31.5	35.3206	Yes	cellular_component;endosome;plasmamembrane;cytoplasmicmembrane-boundedvesicle;	EH DOMAIN-CONTAINING PROTEIN 1.
RTN3	IPI00028946 ; IPI00398795 ; IPI00412154 ; IPI00743293	human	Tumor only										9	2	0	0	5	2	0.152003	0	Yes	23.6667	35.4585	No	extracellularspace;cell;endoplasmicreticulum;Golgiapparatus;	ISOFORM 3 OF RETICULON-3.
CKS1B	IPI00015104 ; IPI00413006 ; IPI00514250 ; IPI00787092	human	Tumor only														2	2			No	5.5	80.8924	No	nucleoplasm;"GO:0005654,EXP"	CYCLIN-DEPENDENT KINASES REGULATORY SUBUNIT 1.
PSMD7	IPI00019927	human	Tumor only										5	4			2	2			No	22	25.2605	Yes	intracellular;cytosol;proteincomplex;	26S PROTEASOME NON-ATPASE REGULATORY SUBUNIT 7.
HMG1L10	IPI00018755 ; IPI00742929 ; IPI00886941	human	Tumor only										35	2			30	5			No	12.5	40.2953	No	nucleus;chromosome;	HIGH MOBILITY GROUP PROTEIN 1-LIKE 10.
PDZD11	IPI00550841 ; IPI00641523	human	Tumor only										4	3							Yes	11.5	36.1307	Yes	plasmamembrane;cytosol;extracellularregion;"GO:0005829,IDA;GO:0005886,IDA"	ISOFORM 1 OF PDZ DOMAIN-CONTAINING PROTEIN 11.
ERO1L	IPI00386755 ; IPI00872773	human	Tumor only										15	6	-0.613532	0.06	29	10	0.862496	0.31	No	31.5	43.732	No	cell;endoplasmicreticulum;"GO:0005783,IDA" /// endoplasmicreticulum;	ERO1-LIKE PROTEIN ALPHA PRECURSOR.
RPL10A	IPI00412579 ; IPI00827508	human	Tumor only										26	4	0.0291463	0	23	4	-0.443607	0.42	No	17.5	29.8516	Yes	cytosol;intracellular;ribosome;"GO:0005829,EXP"	60S RIBOSOMAL PROTEIN L10A.
OCIAD1	IPI00016405 ; IPI00816371 ; IPI00816523	human	Tumor only										2	2	0.152003	0					No	12.6667	65.8433	No	endosome;	ISOFORM 1 OF OCIA DOMAIN-CONTAINING PROTEIN 1.
TMED2	IPI00016608 ; IPI00797864	human	Tumor only										19	3			17	2			No	11.5	29.5657	Yes	organelle;cytoplasm;cell;cytoplasmicmembrane-boundedvesicle;Golgiapparatus;"GO:0005737,IDA"	TRANSMEMBRANE EMP24 DOMAIN-CONTAINING PROTEIN 2 PRECURSOR.
EFNB2	IPI00005126 ; IPI00552558	human	Tumor only										2	2							No	13.5	45.2982	No	plasmamembrane;	EPHRIN-B2 PRECURSOR.
SFRS2	IPI00005978 ; IPI00385786 ; IPI00796848	human	Tumor only										5	3			4	1			No	12	132.075	No	nucleus;"GO:0005634,IDA"	SPLICING FACTOR, ARGININE/SERINE-RICH 2.
PAIP2	IPI00304483	human	Tumor only										5	2	0.621488	0.01	3	1	0.286304	0.02	No	5	78.3181	No	cytoplasm;"GO:0005737,IDA"	POLYADENYLATE-BINDING PROTEIN-INTERACTING PROTEIN 2.
ADSS	IPI00026833	human	Tumor only										9	5	0.514573	0.17	6	2			No	30	31.2904	Yes	cellular_component;cytoplasm;	ADENYLOSUCCINATE SYNTHETASE ISOZYME 2.
LSM14A	IPI00410590 ; IPI00478300	human	Tumor only										5	2							not annotated	26.5	53.6899	No		ISOFORM 2 OF LSM14 PROTEIN HOMOLOG A.
TPBG	IPI00009111	human	Tumor only										5	3			2	1			No	21	52.5905	No	cell;plasmamembrane;	TROPHOBLAST GLYCOPROTEIN PRECURSOR.
MICALL1	IPI00174962 ; IPI00878088 ; IPI00878263	human	Tumor only										4	4	0.810966	0	1	1			No	31.3333	47.5253	No	cytoskeleton;cytoplasm;	MICAL-LIKE PROTEIN 1.
PFKM	IPI00219585	human	Tumor only										8	4			2	2			No	42	32.4765	Yes	proteincomplex;cytosol;cytoplasm;endoplasmicreticulum;"GO:0005783,IDA;GO:0005829,EXP;GO:0005829,IDA;GO:0043234,IDA"	ISOFORM 2 OF 6-PHOSPHOFRUCTOKINASE, MUSCLE TYPE.
HNRNPA3	IPI00419373 ; IPI00455134	human	Tumor only										47	7	0.535332	0.03	56	9	0.321928	0.03	No	24.5	39.1233	No	nucleus;	ISOFORM 1 OF HETEROGENEOUS NUCLEAR RIBONUCLEOPROTEIN A3.
PAICS	IPI00217223 ; IPI00815732	human	Tumor only										54	11	-0.176323	0.25	60	9	0.104697	0.13	No	31	36.5451	Yes	proteincomplex;cytoplasm;	MULTIFUNCTIONAL PROTEIN ADE2.
	IPI00872387	human	Tumor only										19	3			14	5			No	18	44.7876	No	intracellular;ribosome;	UNCHARACTERIZED PROTEIN ENSP00000381447 (FRAGMENT).
	IPI00871908	human	Tumor only										24	3	-0.0703893	0.07	26	5	-0.15056	0.1	not annotated	19	47.1088	No		32 KDA PROTEIN.
MRPL23	IPI00293476 ; IPI00658024 ; IPI00853031 ; IPI00853201 ; IPI00871573 ; IPI00872806 ; IPI00894530	human	Tumor only										2	2							No	12.8	32.6246	No	mitochondrion;ribosome; /// ribosome;	MITOCHONDRIAL 39S RIBOSOMAL PROTEIN L23.
POR	IPI00470467 ; IPI00792395 ; IPI00880028 ; IPI00894547	human	Tumor only										9	5			7	4	-0.214125	0	No	41	40.7932	No	cell;endoplasmicreticulum; /// cell;	NADPH--CYTOCHROME P450 REDUCTASE.
PSMD4	IPI00022694 ; IPI00216247 ; IPI00853509 ; IPI00853609	human	Tumor only										2	1			5	3	-0.15056	0	No	11.75	29.7946	No	intracellular;cytosol;proteincomplex; /// cytosol;proteincomplex;intracellular; /// proteincomplex;cytosol;	ISOFORM RPN10A OF 26S PROTEASOME NON-ATPASE REGULATORY SUBUNIT 4.
CD109	IPI00152540 ; IPI00788676 ; IPI00795327 ; IPI00795801	human	Tumor only										10	5			5	3			Yes	66	31.7657	Yes	cell;plasmamembrane;extracellularregion;	ISOFORM 1 OF CD109 ANTIGEN PRECURSOR.
SEC23A	IPI00017375	human	Tumor only										14	6			27	8	0.68966	0.07	No	47	46.898	No	cytoplasm;cell;proteincomplex;cytosol;endoplasmicreticulum;cytoplasmicmembrane-boundedvesicle;Golgiapparatus;	PROTEIN TRANSPORT PROTEIN SEC23A.
PSMA1	IPI00016832 ; IPI00472442 ; IPI00871889	human	Tumor only										18	10	-0.201634	0.03	21	5	0	0.04	No	20.5	53.6509	No	intracellular;cytoplasm;proteincomplex;cytosol;nucleus; /// proteincomplex;cytosol;nucleus;intracellular;cytoplasm; /// proteincomplex;cytosol;intracellular;	ISOFORM SHORT OF PROTEASOME SUBUNIT ALPHA TYPE-1.
USP14	IPI00219913 ; IPI00640357 ; IPI00871297 ; IPI00872664	human	Tumor only										8	3	1	0.08	13	9	0.304006	0.04	No	37.5	56.7906	No	cell;cytoplasm;"GO:0005737,IDA" /// cytoplasm;"GO:0005737,IDA"	UBIQUITIN CARBOXYL-TERMINAL HYDROLASE 14.
RAB11B;RAB11A	IPI00020436 ; IPI00795676	human	Tumor only										7	3			5	4			No	18	31.6629	Yes	intracellular;plasmamembrane;	RAS-RELATED PROTEIN RAB-11B.
CUGBP1;CUGBP2	IPI00034015 ; IPI00218388 ; IPI00218389 ; IPI00410277 ; IPI00607544 ; IPI00845479 ; IPI00845480 ; IPI00853009 ; IPI00853320	human	Tumor only										2	1			2	2			No	23	42.1434	No	nucleus;intracellular;cytoplasm; /// cell;nucleus;cytoplasm;	ISOFORM 1 OF CUG-BP- AND ETR-3-LIKE FACTOR 1.
G3BP1	IPI00012442 ; IPI00442863	human	Tumor only										37	10	0.395929	0	29	7			No	21	56.3461	No	intracellular;plasmamembrane;cytoplasm;nucleus; /// intracellular;	RAS GTPASE-ACTIVATING PROTEIN-BINDING PROTEIN 1.
TBC1D9B	IPI00307257 ; IPI00640908	human	Tumor only										2	2							No	67	53.7746	No	cell;intracellular;	ISOFORM 1 OF TBC1 DOMAIN FAMILY MEMBER 9B.
SND1	IPI00140420	human	Tumor only										38	11	-3.57773	5.52	61	15			No	67	42.8664	No	nucleus;intracellular;cytoplasm;cytoplasmicmembrane-boundedvesicle;Golgiapparatus;"GO:0005794,IDA"	STAPHYLOCOCCAL NUCLEASE DOMAIN-CONTAINING PROTEIN 1.
TMED9	IPI00023542	human	Tumor only										8	3	0.0291463	0.03	14	2	0.104697	0.11	No	18	40.3247	No	cell;cytoplasm;endoplasmicreticulum;"GO:0005737,IDA"	TRANSMEMBRANE EMP24 PROTEIN TRANSPORT DOMAIN CONTAINING 9.
GRPEL1	IPI00029557	human	Tumor only										3	2			2	1			No	20	40.4503	No	mitochondrion;"GO:0005739,IDA"	GRPE PROTEIN HOMOLOG 1, MITOCHONDRIAL PRECURSOR.
RQCD1	IPI00023101 ; IPI00063902	human	Tumor only														2	2			No	18.5	47.186	No	nucleus;	CELL DIFFERENTIATION PROTEIN RCD1 HOMOLOG.
PPP3CB;PPP3CA	IPI00027809 ; IPI00179415 ; IPI00181738 ; IPI00218862 ; IPI00747748 ; IPI00748557 ; IPI00872209 ; IPI00872930	human	Tumor only										2	2			1	1			No	30.4	47.9731	No	proteincomplex;nucleus;intracellular;cytoplasm; /// proteincomplex;intracellular;"GO:0005622,IDA;GO:0043234,IDA"	SERINE/THREONINE PROTEIN PHOSPHATASE.
SKP1	IPI00301364	human	Tumor only										7	3			7	3			No	14	53.0331	No	nucleoplasm;proteincomplex;cytosol;intracellular;"GO:0005654,EXP;GO:0005829,EXP;GO:0005829,EXP;GO:0005829,EXP"	ISOFORM 1 OF S-PHASE KINASE-ASSOCIATED PROTEIN 1.
TUBB4	IPI00023598	human	Tumor only										293	16	0.268817	0.09					No	21	36.5991	Yes	proteincomplex;cilium;cytoskeleton;	TUBULIN BETA-4 CHAIN.
ACTL6A	IPI00003627 ; IPI00216622 ; IPI00792088	human	Tumor only										4	3			8	2			No	16.6667	45.2303	No	nucleoplasm;plasmamembrane;proteincomplex;nucleus;"GO:0005886,IDA;GO:0005654,IDA;GO:0043234,IDA"	ISOFORM 1 OF ACTIN-LIKE PROTEIN 6A.
SH3BGRL	IPI00025318 ; IPI00872670	human	Tumor only										21	6			3	2			No	8	49.8807	No	cytoplasm;nucleus;	SH3 DOMAIN-BINDING GLUTAMIC ACID-RICH-LIKE PROTEIN.
PSMB5	IPI00375704 ; IPI00479306	human	Tumor only										5	3			10	6	-0.298658	0	No	17	27.8887	Yes	proteincomplex;cytosol;nucleus;intracellular;cytoplasm;	29 KDA PROTEIN.
TUBA3C;TUBA3D	IPI00179709 ; IPI00871262	human	Tumor only										254	13	0.268817	0.25					No	23	34.9267	Yes	proteincomplex;cytoskeleton;	ISOFORM 1 OF TUBULIN ALPHA-3C/D CHAIN.
ATP6V1B2;ATP6V1B1	IPI00007812 ; IPI00304911 ; IPI00418418 ; IPI00848320	human	Tumor only										18	8	0.473931	0.03	19	4	0.268817	0.09	No	29.3333	32.7877	Yes	cell;cytoplasm;proteincomplex;cytoplasmicmembrane-boundedvesicle; /// plasmamembrane;cell;proteincomplex;cytoplasm;vacuole;"GO:0005773,IMP;GO:0043234,IMP" /// plasmamembrane;cell;proteincomplex;cytoplasm;"GO:0005773,IMP;GO:0043234,IMP"	VACUOLAR ATP SYNTHASE SUBUNIT B, BRAIN ISOFORM.
SHMT2	IPI00748411	human	Tumor only										12	6	0.0439433	0.09	12	7	2.05889	0	No	39	42.9169	No	mitochondrion;	SERINE HYDROXYMETHYLTRANSFERASE (FRAGMENT).
TUBGCP2	IPI00029705 ; IPI00384183	human	Tumor only										3	1			2	2			No	35.5	31.1195	Yes	cytoskeleton;microtubuleorganizingcenter;	GAMMA-TUBULIN COMPLEX COMPONENT 2.
FKBP2	IPI00002535	human	Tumor only										21	5	0.321928	0.03	11	5	-0.0285692	0	No	10	39.0063	Yes	cell;endoplasmicreticulum;	FK506-BINDING PROTEIN 2 PRECURSOR.
CHORDC1	IPI00015897 ; IPI00869333 ; IPI00885057	human	Tumor only										6	2	0.184425	0	6	4			No	22.6667	44.5109	No	cellular_component;	ISOFORM 1 OF CYSTEINE AND HISTIDINE-RICH DOMAIN-CONTAINING PROTEIN 1.
RPLP2	IPI00008529	human	Tumor only										48	5			79	6			No	5	53.6426	No	intracellular;ribosome;cytosol;"GO:0005829,EXP"	60S ACIDIC RIBOSOMAL PROTEIN P2.
UCHL5	IPI00219512 ; IPI00219513 ; IPI00299313 ; IPI00549253 ; IPI00549820 ; IPI00549849 ; IPI00641843 ; IPI00642374 ; IPI00643425	human	Tumor only										1	1	-0.454176	0	2	2			No	20	43.6564	No	proteincomplex;cytosol;intracellular; /// intracellular;	ISOFORM 2 OF UBIQUITIN CARBOXYL-TERMINAL HYDROLASE ISOZYME L5.
FTL	IPI00375676 ; IPI00738499 ; IPI00893729	human	Tumor only										2	2			1	1			No	12	22.3208	Yes	proteincomplex;intracellular;	FERRITIN LIGHT POLYPEPTIDE VARIANT.
CS	IPI00025366 ; IPI00383539 ; IPI00793839	human	Tumor only										17	10			5	4			No	22.3333	21.42	Yes	mitochondrion;"GO:0005739,IDA;GO:0005739,EXP"	CITRATE SYNTHASE, MITOCHONDRIAL PRECURSOR.
CSE1L	IPI00022744 ; IPI00219762 ; IPI00219994	human	Tumor only										27	15	-0.189034	0.01	43	19	-0.201634	0.02	No	61.3333	40.2199	No	cytoplasm;proteincomplex;nucleus;nuclearenvelope; /// proteincomplex;nucleus;nuclearenvelope;cytoplasm;	ISOFORM 1 OF EXPORTIN-2.
EEF1B2	IPI00178440 ; IPI00414723	human	Tumor only										32	4	0.0588937	0.15	31	4	0.168123	0.02	No	13	47.704	No	proteincomplex;cytosol;cytoplasm;"GO:0005829,EXP"	ELONGATION FACTOR 1-BETA.
PSMC1	IPI00011126	human	Tumor only										11	7	0.168123	0	15	6			No	30	36.5889	Yes	intracellular;cytoplasm;cytosol;nucleus;proteincomplex;	26S PROTEASE REGULATORY SUBUNIT 4.
	IPI00030877	human	Tumor only										6	4	-0.0703893	0	3	2			No	11	43.8152	No	intracellular;organelle;endoplasmicreticulum;"GO:0043226,IDA;GO:0005622,IDA"	15 KDA SELENOPROTEIN ISOFORM 1 PRECURSOR.
NDUFA10	IPI00029561 ; IPI00103509 ; IPI00555877 ; IPI00894154 ; IPI00894261 ; IPI00894559	human	Tumor only										4	2			2	1			No	19.6	34.7457	Yes	proteincomplex;mitochondrion; /// mitochondrion;	NADH DEHYDROGENASE [UBIQUINONE] 1 ALPHA SUBCOMPLEX SUBUNIT 10, MITOCHONDRIAL PRECURSOR.
GRHPR	IPI00037448 ; IPI00550682	human	Tumor only										9	6	0.251539	0	10	6	0.454032	0.01	No	20.5	39.6326	Yes	cellular_component;cytoplasm;"GO:0005737,IDA"	GLYOXYLATE REDUCTASE/HYDROXYPYRUVATE REDUCTASE.
BID	IPI00385121 ; IPI00413587 ; IPI00420084 ; IPI00871585	human	Tumor only										3	3			2	2			No	12.25	55.0343	No	cell;cytosol;mitochondrion;cytoplasm;"GO:0005739,EXP;GO:0005739,EXP;GO:0005739,EXP;GO:0005829,EXP;GO:0005829,EXP;GO:0005829,EXP;GO:0005829,EXP"	ISOFORM 3 OF BH3-INTERACTING DOMAIN DEATH AGONIST.
PGM1	IPI00217872 ; IPI00219526 ; IPI00844159	human	Tumor only										25	12			30	11	0.321928	0.01	No	42.6667	32.4822	Yes	cytosol;cytoplasm;"GO:0005829,EXP"	ISOFORM 2 OF PHOSPHOGLUCOMUTASE-1.
UBE2I	IPI00032957	human	Tumor only										3	2	0.268817	0.01	8	2			No	9	45.776	No	nucleoplasm;nucleus;nuclearchromosome;"GO:0005654,IDA"	SUMO-CONJUGATING ENZYME UBC9.
RAB7A	IPI00016342	human	Tumor only										38	7	-0.604071	0.19	26	7	-0.485427	0.13	No	18	27.6763	Yes	intracellular;organelle;endosome;lysosome;cytoplasm;cytoplasmicmembrane-boundedvesicle;Golgiapparatus;"GO:0005737,IDA;GO:0005764,IDA;GO:0005768,IDA"	RAS-RELATED PROTEIN RAB-7A.
PAFAH1B1	IPI00218728 ; IPI00873228	human	Tumor only										5	2	0.0291463	0.05	4	1			No	30.5	34.7059	Yes	cell;cytosol;nucleus;proteincomplex;nuclearenvelope;chromosome;cytoskeleton;microtubuleorganizingcenter;cytoplasm;cilium;"GO:0005856,IDA;GO:0005694,IDA;GO:0043234,IDA;GO:0005694,IDA;GO:0043234,IDA;GO:0005694,IDA;GO:0043234,IDA;GO:0005856,IDA;GO:0043234,ID	ISOFORM 1 OF PLATELET-ACTIVATING FACTOR ACETYLHYDROLASE IB SUBUNIT ALPHA.
ILF3	IPI00219330 ; IPI00298788 ; IPI00298789 ; IPI00414335 ; IPI00418313 ; IPI00556173 ; IPI00556364	human	Tumor only										21	9	-0.0565835	0	16	7	0.200913	0.01	No	44.2	39.7426	No	nucleus;mitochondrion;intracellular;"GO:0005634,IDA;GO:0005634,IDA;GO:0005739,IDA;GO:0005739,IDA"	ISOFORM 5 OF INTERLEUKIN ENHANCER-BINDING FACTOR 3.
PPP1R14B	IPI00398922	human	Tumor only										17	5	0.0588937	0.09	30	3	0.577767	0.03	No	8	52.2739	No	cytoplasm;	PROTEIN PHOSPHATASE 1 REGULATORY SUBUNIT 14B.
	IPI00032827	human	Tumor only										7	4	0.184425	0.01	5	2	0.217591	0	No	12	38.644	Yes	nucleus;	PRE-MRNA BRANCH SITE PROTEIN P14.
PCNA	IPI00021700	human	Tumor only										38	6	-0.0285692	0.05	22	4	-0.389567	0.12	No	19	45.154	No	intracellular;nucleoplasm;nucleus;proteincomplex;nuclearenvelope;chromosome;"GO:0005654,EXP;GO:0005654,EXP"	PROLIFERATING CELL NUCLEAR ANTIGEN.
HNRNPA0	IPI00011913	human	Tumor only										40	6	0.621488	0.04	23	6	0.434403	0.07	No	15	40.3459	No	nucleus;	HETEROGENEOUS NUCLEAR RIBONUCLEOPROTEIN A0.
WARS	IPI00295400 ; IPI00412737	human	Tumor only										13	8			5	3	0.184425	0.01	No	31.5	39.9358	No	cell;cytoplasm; /// cytoplasm;	TRYPTOPHANYL-TRNA SYNTHETASE, CYTOPLASMIC.
RPS12	IPI00013917	human	Tumor only										49	3	0.0740006	0.17	23	4	-0.0976108	0.05	No	10	20.2409	Yes	intracellular;ribosome;cytoplasm;cytosol;"GO:0005829,EXP;GO:0005840,IDA;GO:0005829,IDA;GO:0005840,IDA;GO:0005829,IDA"	40S RIBOSOMAL PROTEIN S12.
CD2AP	IPI00412771 ; IPI00872533	human	Tumor only										18	9	0.120294	0.06	5	4	0	0	No	46.5	44.4133	No	plasmamembrane;nucleolus;cell;proteincomplex;cytoskeleton;cytoplasm;"GO:0005623,IDA;GO:0005730,IDA;GO:0005886,IDA;GO:0005856,IDA;GO:0043234,IDA"	CD2-ASSOCIATED PROTEIN.
SLC25A11	IPI00219729 ; IPI00796094 ; IPI00797802	human	Tumor only										4	4							No	21	22.2252	Yes	cell;plasmamembrane;mitochondrion;"GO:0005739,EXP"	MITOCHONDRIAL 2-OXOGLUTARATE/MALATE CARRIER PROTEIN.
PSMA4	IPI00299155	human	Tumor only										13	6	0.0439433	0.1	14	4	-0.0143553	0.03	No	16	43.2288	No	proteincomplex;cytosol;nucleus;intracellular;cytoplasm;	PROTEASOME SUBUNIT ALPHA TYPE-4.
VAMP3	IPI00549343 ; IPI00871693	human	Tumor only										10	2			10	2			No	6	17.735	Yes	plasmamembrane;cell;cellular_component; /// cell;	VESICLE-ASSOCIATED MEMBRANE PROTEIN 3.
RPS10	IPI00008438	human	Tumor only										17	4			17	4			No	16	44.1903	No	ribosome;cytoplasm;cytosol;"GO:0005829,EXP;GO:0005840,IDA;GO:0005829,IDA;GO:0005840,IDA;GO:0005829,IDA"	40S RIBOSOMAL PROTEIN S10.
SORD	IPI00216057	human	Tumor only										13	5	-0.0840643	0.02	9	2			not annotated	26	30.5294	Yes		SORBITOL DEHYDROGENASE.
PDS5B	IPI00240812 ; IPI00845353 ; IPI00845446 ; IPI00845459 ; IPI00877614	human	Tumor only										2	2	-0.111031	0	2	2			No	56.6	42.4745	No	nucleus;	ISOFORM 1 OF SISTER CHROMATID COHESION PROTEIN PDS5 HOMOLOG B.
PHB2	IPI00027252	human	Tumor only										38	7			43	5			No	29	34.7124	Yes	cell;nucleus;mitochondrion;cytoplasm;	PROHIBITIN-2.
MDH1	IPI00291005	human	Tumor only										33	6	0.200913	0.03	23	7	0.120294	0.02	No	24	23.8791	Yes	cytosol;cytoplasm;"GO:0005829,EXP"	MALATE DEHYDROGENASE, CYTOPLASMIC.
BAT1	IPI00893920	human	Tumor only														7	3	0.168123	0.01	not annotated	17	41.6	No		HLA-B ASSOCIATED TRANSCRIPT 1.
CPOX	IPI00093057	human	Tumor only										8	5			2	2	2.73697	0	No	34	55.0863	No	mitochondrion;	COPROPORPHYRINOGEN III OXIDASE, MITOCHONDRIAL PRECURSOR.
MPZ	IPI00478921	human	Tumor only										5	2			3	1			No	17	47.0818	No	plasmamembrane;	MYELIN PROTEIN ZERO.
PCBP2	IPI00795754	human	Tumor only										13	5	-0.344828	0.46					not annotated	10	43.0674	No		24 KDA PROTEIN.
PA2G4	IPI00790307	human	Tumor only														11	4	-0.565597	0.39	not annotated	13	20.0963	Yes		20 KDA PROTEIN.
PFKM	IPI00796852	human	Tumor only										5	2							not annotated	7	28.5346	Yes		11 KDA PROTEIN.
BAT1	IPI00792043 ; IPI00892588	human	Tumor only														11	4	0.304006	0.03	not annotated	16	40.0542	No		HLA-B ASSOCIATED TRANSCRIPT 1.
BAT1	IPI00643815	human	Tumor only														23	6	0.152003	0.01	not annotated	20	35.9969	Yes		HLA-B ASSOCIATED TRANSCRIPT 1.
LAMA3	IPI00377045 ; IPI00790353 ; IPI00790908	human	Tumor only										26	11	-0.238787	0.3	123	25	-0.0976108	0.22	Yes	173.667	41.0271	No	proteinaceousextracellularmatrix;proteincomplex; /// proteinaceousextracellularmatrix;proteincomplex;extracellularregion;	LAMININ ALPHA-3 CHAIN VARIANT 1.
BAT1	IPI00792599	human	Tumor only														14	5	0.37707	0.03	not annotated	13	40.9	No		HLA-B ASSOCIATED TRANSCRIPT 1.
FAM83H	IPI00784320	human	Tumor only										68	19	0.415037	0.04	46	18	0.556393	0.03	not annotated	68	61.9452	No		PROTEIN FAM83H.
PCBP2	IPI00790019	human	Tumor only										8	2	-0.432959	0.52					not annotated	8	39.1174	Yes		20 KDA PROTEIN.
NME2	IPI00797082	human	Tumor only										20	3							not annotated	8	40.1183	No		10 KDA PROTEIN.
UNC84A	IPI00847194	human	Tumor only														8	4	-1.24489	0.09	not annotated	25	44	No		SIMILAR TO SAD1/UNC-84 PROTEIN-LIKE 1.
TPM3	IPI00643370	human	Tumor only										15	4	0.120294	0	35	6	1.47393	0.11	not annotated	16	47.0639	No		TROPOMYOSIN 3.
MRPL53	IPI00061531	human	Tumor only										5	2	-0.201634	0					No	9	28.5	Yes	mitochondrion;ribosome;	39S RIBOSOMAL PROTEIN L53, MITOCHONDRIAL PRECURSOR.
	IPI00787155	human	Tumor only										2	2			1	1			not annotated	10	56.4217	No		HYPOTHETICAL PROTEIN, PARTIAL.
HUWE1	IPI00640987	human	Tumor only										4	2	-0.226509	0					No	71	55.8	No	intracellular;	HECT, UBA AND WWE DOMAIN CONTAINING 1.
RAB2A	IPI00790570	human	Tumor only										3	2							not annotated	9	32.3	Yes		PROTEIN.
MYL6B	IPI00793089	human	Tumor only										38	5	0.915936	0.04	33	4	0.217591	0.06	not annotated	8	36.9887	Yes		13 KDA PROTEIN.
NME2	IPI00790856	human	Tumor only										21	4	0.535332	0.06	44	3			not annotated	6	21.0435	Yes		NUCLEOSIDE DIPHOSPHATE KINASE.
SHMT2	IPI00794549	human	Tumor only										4	3			9	5			not annotated	30	42.485	No		45 KDA PROTEIN.
ANXA4	IPI00793199 ; IPI00872780	human	Tumor only										52	8	0.37707	0.06	45	9	0.286304	0.03	No	27.5	35.1408	Yes	cytoskeleton;cytoplasm;"GO:0005856,IDA"	ANNEXIN IV.
2010-09-02	IPI00893658	human	Tumor only														12	3			not annotated	14	40.6745	No		22 KDA PROTEIN.
	IPI00307200	human	Tumor only										13	6			4	4	0.643856	0	No	47	51.8933	No	cell;plasmamembrane;nucleus;cytoplasm;	SWITCH-ASSOCIATED PROTEIN 70.
COL5A2	IPI00739099 ; IPI00852798	human	Tumor only										7	3			2	1			Yes	47	26.5976	Yes	proteinaceousextracellularmatrix;extracellularregion;	COLLAGEN ALPHA-2(V) CHAIN PRECURSOR.
HSD17B10	IPI00017726 ; IPI00336094	human	Tumor only										37	12	-0.0426443	0.04	71	10	0.286304	0.03	No	16.5	19.3816	Yes	plasmamembrane;cytoplasm;endoplasmicreticulum;mitochondrion; /// plasmamembrane;mitochondrion;cytoplasm;endoplasmicreticulum;	ISOFORM 1 OF 3-HYDROXYACYL-COA DEHYDROGENASE TYPE-2.
KLK14	IPI00000700 ; IPI00793215	human	Tumor only										9	5	0.888969	0.13	23	7	-0.275007	0.42	Yes	15.5	62.9832	No	extracellularregion;	KALLIKREIN-14 PRECURSOR.
NME2	IPI00791971	human	Tumor only										14	3	0.535332	0.06	34	2			not annotated	5	33.3694	Yes		9 KDA PROTEIN.
SEL1L	IPI00002790 ; IPI00555723	human	Tumor only										2	2							No	29.5	47.7835	No	cell;endoplasmicreticulum;	ISOFORM 1 OF PROTEIN SEL-1 HOMOLOG 1 PRECURSOR.
	IPI00740545	human	Tumor only														112	4			not annotated	70	45.1862	No		SIMILAR TO PROTEIN EXPRESSED IN PROSTATE, OVARY, TESTIS, AND PLACENTA 2 ISOFORM 2.
	IPI00871956	human	Tumor only										19	5	0.0439433	0.08					not annotated	18	21.4022	Yes		SIMILAR TO RIBOSOMAL PROTEIN S2.
ATP1B1	IPI00747849 ; IPI00871221	human	Tumor only										1	1			3	3	0.251539	0	No	19	30.9821	Yes	cell;plasmamembrane;proteincomplex;	ISOFORM 1 OF SODIUM/POTASSIUM-TRANSPORTING ATPASE SUBUNIT BETA-1.
COL1A2	IPI00304962 ; IPI00873137	human	Tumor only										11	3							Yes	80	23.3786	Yes	proteinaceousextracellularmatrix;plasmamembrane;extracellularregion;"GO:0005576,EXP;GO:0005576,EXP;GO:0005576,EXP;GO:0005576,EXP;GO:0005576,EXP;GO:0005886,EXP;GO:0005886,EXP;GO:0005886,EXP;GO:0005886,EXP;GO:0005886,EXP;GO:0005886,EXP"	COLLAGEN ALPHA-2(I) CHAIN PRECURSOR.
CCDC6	IPI00000634 ; IPI00807498 ; IPI00871951	human	Tumor only										4	3							No	28	66.2692	No	cellular_component;cytoplasm;cytoskeleton;	COILED-COIL DOMAIN-CONTAINING PROTEIN 6.
SPRR1A	IPI00017987 ; IPI00156829	human	Tumor only										57	6	0.888969	0.1	63	4	0.104697	0.16	No	8	93.8349	No	cytoplasm;cytoskeleton;"GO:0005856,IDA" /// cytoskeleton;cytoplasm;"GO:0005856,IDA"	CORNIFIN-A.
UNC45A	IPI00072534 ; IPI00735181	human	Tumor only										10	5	0.434403	0.05	10	5	0.761213	0	No	64	42.5132	No	nucleus;cytoplasm;	ISOFORM 1 OF UNC45 HOMOLOG A.
TMTC3	IPI00470924 ; IPI00829865	human	Tumor only										5	4	0.304006	0	5	3			No	58	38.4265	Yes	cell;	ISOFORM 2 OF TRANSMEMBRANE AND TPR REPEAT-CONTAINING PROTEIN 3.
TOX4	IPI00006586	human	Tumor only										2	2							No	19	65.9894	No	nucleus;chromosome;	TOX HIGH MOBILITY GROUP BOX FAMILY MEMBER 4.
COL6A2	IPI00073454 ; IPI00220613 ; IPI00304840	human	Tumor only										3	3							Yes	65	28.1388	Yes	proteinaceousextracellularmatrix;plasmamembrane;extracellularregion;cytoplasm;"GO:0005737,IDA;GO:0005737,IDA;GO:0005737,IDA;GO:0005886,IDA;GO:0005886,IDA;GO:0005886,IDA"	ISOFORM 2C2A' OF COLLAGEN ALPHA-2(VI) CHAIN PRECURSOR.
CSRP3	IPI00032164	human	Tumor only										4	1			6	2	-0.485427	0.14	No	15	38.7175	Yes	nucleus;cytoskeleton;cytoplasm;	CYSTEINE AND GLYCINE-RICH PROTEIN 3.
BICD2	IPI00178185 ; IPI00337667	human	Tumor only										7	6	0.358454	0	9	4			No	66	50.7144	No	cytoskeleton;cytoplasm;Golgiapparatus;	ISOFORM 1 OF PROTEIN BICAUDAL D HOMOLOG 2.
ATP6V1F	IPI00004488	human	Tumor only										3	3							No	9	39.4916	Yes	cell;proteincomplex;	VACUOLAR PROTON PUMP SUBUNIT F.
THOC6	IPI00301252 ; IPI00328985	human	Tumor only										1	1			3	3			not annotated	20.5	52.2874	No		ISOFORM 3 OF THO COMPLEX SUBUNIT 6 HOMOLOG.
IPO5	IPI00793443	human	Tumor only										28	15	0	0.05	25	16	-0.124328	0.03	No	58	44.6347	No	proteincomplex;nucleus;nuclearenvelope;cytoplasm;	RAN BINDING PROTEIN 5.
DDX3X	IPI00215637	human	Tumor only										66	12	0.68966	0.02	46	11	0.286304	0.03	No	45	49.3766	No	nucleoplasm;plasmamembrane;nucleus;cytoplasm;"GO:0005634,IDA;GO:0005737,IDA;GO:0005886,IDA"	ATP-DEPENDENT RNA HELICASE DDX3X.
SHMT2	IPI00794060	human	Tumor only										11	5	0.0439433	0.09	15	5	1.152	0.12	not annotated	14	41.0912	No		26 KDA PROTEIN.
	IPI00872032 ; IPI00888333	human	Tumor only														4	2	3.05889	0	not annotated	20	25.3525	Yes		SIMILAR TO TRANSLATION ELONGATION FACTOR 1 ALPHA 1-LIKE 14.
SVIL	IPI00018370 ; IPI00412650	human	Tumor only										5	3			3	2			No	139.5	55.2828	No	plasmamembrane;cytoplasm;nucleus;cytoskeleton;"GO:0005634,IDA;GO:0005737,IDA;GO:0005886,IDA;GO:0005737,IDA" /// plasmamembrane;nucleus;cytoskeleton;cytoplasm;"GO:0005634,IDA;GO:0005737,IDA;GO:0005886,IDA;GO:0005737,IDA"	ISOFORM 2 OF SUPERVILLIN.
HEBP1	IPI00148063	human	Tumor only										5	3			12	2			No	14	31.0439	Yes	cytosol;mitochondrion;cytoplasm;	HEME-BINDING PROTEIN 1.
	IPI00644968 ; IPI00879518	human	Tumor only										75	6	0.358454	0.04	107	8	0.217591	0.08	No	21	43.0547	No	nucleus;cytoplasm;	SIMILAR TO HETEROGENEOUS NUCLEAR RIBONUCLEOPROTEIN A1.
SLAIN2	IPI00853278	human	Tumor only										3	2							not annotated	38	85.2515	No		SLAIN MOTIF-CONTAINING PROTEIN 2.
HP1BP3	IPI00642238	human	Tumor only										8	2							No	41	51.6583	No	nucleus;chromosome;	HETEROCHROMATIN PROTEIN 1-BINDING PROTEIN 3.
	IPI00879531	human	Tumor only										2	2	0.556393	0	10	2	0.0439433	0	not annotated	6	60.0798	No		9 KDA PROTEIN.
COL14A1	IPI00176193 ; IPI00402215 ; IPI00550918 ; IPI00853230	human	Tumor only										2	2	1.55639	0.01	7	2	-0.0840643	0.01	Yes	70.6667	37.251	Yes	proteinaceousextracellularmatrix;extracellularregion;	ISOFORM 1 OF COLLAGEN ALPHA-1(XIV) CHAIN PRECURSOR.
LZIC	IPI00152900	human	Tumor only										12	7	0.184425	0	10	5			not annotated	15	31.2653	Yes		PROTEIN LZIC.
PYGB	IPI00004358	human	Tumor only										73	21	0.0439433	0.08	85	18	-0.344828	0.06	No	63	37.6368	Yes	cytoplasm;"GO:0005737,IDA"	GLYCOGEN PHOSPHORYLASE, BRAIN FORM.
SPCS1	IPI00794229	human	Tumor only										4	1			6	2			not annotated	4	42.7863	No		9 KDA PROTEIN.
GAGE1	IPI00783414	human	Tumor only										3	1			13	2	0.643856	0	not annotated	1	68.2817	No		GAGE1 PROTEIN (FRAGMENT).
DCTN1	IPI00029485 ; IPI00219114 ; IPI00872359 ; IPI00873712	human	Tumor only										15	6			18	15			No	81.6667	48.6064	No	proteincomplex;cytoskeleton;cytoplasm;"GO:0005856,IDA"	ISOFORM P150 OF DYNACTIN SUBUNIT 1.
ISOC2	IPI00003031 ; IPI00551022	human	Tumor only										4	3	-0.111031	0	7	3			No	10.5	60.3005	No	cytoplasm;nucleus;mitochondrion;"GO:0005634,IDA;GO:0005737,IDA" /// nucleus;mitochondrion;cytoplasm;"GO:0005634,IDA;GO:0005737,IDA"	ISOFORM 2 OF ISOCHORISMATASE DOMAIN-CONTAINING PROTEIN 2, MITOCHONDRIAL PRECURSOR.
HSDL2	IPI00031107 ; IPI00414384	human	Tumor only										4	3			1	1			No	26.5	27.4444	Yes	mitochondrion;	ISOFORM 2 OF HYDROXYSTEROID DEHYDROGENASE-LIKE PROTEIN 2.
	IPI00478114 ; IPI00844369	human	Tumor only														7	2	0.0439433	0.05	No	8	46.7452	No	intracellular;ribosome;	UNCHARACTERIZED PROTEIN ENSP00000352682.
NXN	IPI00304267	human	Tumor only										8	3			2	2			No	23	43.0428	No	nucleus;cytoplasm;	ISOFORM 1 OF NUCLEOREDOXIN.
TNNI2	IPI00216236 ; IPI00657955	human	Tumor only										6	1			7	2	-1.20163	0	No	18	70.5209	No	cell;proteincomplex;nucleus;cytoskeleton;cytoplasm;"GO:0005634,IDA;GO:0005856,IDA;GO:0005737,IDA;GO:0043234,IDA"	TROPONIN I, FAST SKELETAL MUSCLE.
PEX14	IPI00025346	human	Tumor only										4	3	0.434403	0	1	1			No	17	73.2512	No	cell;nucleus;peroxisome;"GO:0005777,IDA;GO:0005777,IDA"	PEROXISOMAL MEMBRANE PROTEIN PEX14.
ECHDC3	IPI00256376 ; IPI00477346 ; IPI00643058 ; IPI00892718	human	Tumor only										4	3			7	3	0.836501	0.02	No	14.25	40.2813	No	mitochondrion;	ISOFORM 1 OF ENOYL-COA HYDRATASE DOMAIN-CONTAINING PROTEIN 3, MITOCHONDRIAL PRECURSOR.
	IPI00796697	human	Tumor only										5	3							not annotated	23	56.4072	No		42 KDA PROTEIN.
PSMB4	IPI00555956	human	Tumor only										7	3			5	3			No	16	37.3489	Yes	proteincomplex;cytosol;nucleus;cytoskeleton;intracellular;microtubuleorganizingcenter;cytoplasm;"GO:0005815,IDA;GO:0005856,IDA"	PROTEASOME SUBUNIT BETA TYPE-4 PRECURSOR.
CALU	IPI00789155	human	Tumor only										28	9			68	8			Yes	20	38.4879	Yes	intracellular;organelle;extracellularregion;endoplasmicreticulum;cytoplasmicmembrane-boundedvesicle;Golgiapparatus;"GO:0005783,IDA"	CALUMENIN PRECURSOR.
NME2	IPI00790982	human	Tumor only										7	2			7	3			not annotated	8	34.1463	Yes		9 KDA PROTEIN.
SLC9A3R2	IPI00385034 ; IPI00398293 ; IPI00645815	human	Tumor only										2	2	-0.286881	0					No	23.5	52.9712	No	cell;plasmamembrane;nucleus;cytoplasm;"GO:0005737,IDA;GO:0005886,IDA"	ISOFORM 1 OF NA(+)/H(+) EXCHANGE REGULATORY COFACTOR NHE-RF2.
	IPI00398673	human	Tumor only														7	2			not annotated	16	51.4673	No		SIMILAR TO RIBOSOMAL PROTEIN S10.
WTAP	IPI00014150 ; IPI00220302	human	Tumor only										2	2							No	20	55.0411	No	nucleoplasm;nucleus;nuclearenvelope;"GO:0005634,IDA;GO:0005635,IDA"	ISOFORM 2 OF PRE-MRNA-SPLICING REGULATOR WTAP.
ATP5H	IPI00220487 ; IPI00456049	human	Tumor only										18	5			19	5			No	11.5	31.2781	Yes	cell;proteincomplex;mitochondrion;intracellular;"GO:0043234,IDA;GO:0005739,IDA"	ISOFORM 1 OF ATP SYNTHASE SUBUNIT D, MITOCHONDRIAL.
NDUFS3	IPI00025796	human	Tumor only										7	5			10	7			No	20	37.575	Yes	cell;proteincomplex;mitochondrion;"GO:0043234,IDA;GO:0005739,IDA"	NADH DEHYDROGENASE [UBIQUINONE] IRON-SULFUR PROTEIN 3, MITOCHONDRIAL PRECURSOR.
BCAR1	IPI00011998 ; IPI00641339 ; IPI00645994 ; IPI00646673 ; IPI00872386	human	Tumor only										3	3			1	1			No	48.6667	58.168	No	plasmamembrane;cytoplasm;cell; /// plasmamembrane;cell;cytoplasm; /// cell; /// plasmamembrane;cell;cytoplasm;"GO:0005623,IDA;GO:0005623,IDA;GO:0005737,IDA"	BREAST CANCER ANTI-ESTROGEN RESISTANCE 1.
RPSA	IPI00798361	human	Tumor only										16	5	-1.11103	0.77	49	7	-1.51096	1.07	not annotated	11	26.8436	Yes		17 KDA PROTEIN.
	IPI00797968	human	Tumor only										18	2			26	3			not annotated	5	33.2714	Yes		11 KDA PROTEIN.
TUBA4A	IPI00794009 ; IPI00797717	human	Tumor only										35	4	0.395929	0.05					not annotated	10	29.6177	Yes		22 KDA PROTEIN.
	IPI00878785	human	Tumor only										3	3							not annotated	28	61.1473	No		P40.
PRKCSH	IPI00026154 ; IPI00792916	human	Tumor only										14	8	-0.31034	0.01	30	10	0.0439433	0.05	No	24	61.3933	No	intracellular;proteincomplex;endoplasmicreticulum; /// proteincomplex;endoplasmicreticulum;	GLUCOSIDASE 2 SUBUNIT BETA PRECURSOR.
DNAJC13	IPI00307259 ; IPI00847695	human	Tumor only										2	2			1	1			No	146	40.48	No	cytoplasm;	DNAJ HOMOLOG SUBFAMILY C MEMBER 13.
LUZP1	IPI00296830 ; IPI00395737 ; IPI00744623	human	Tumor only										2	2							No	75.6667	58.173	No	nucleus;	ISOFORM 1 OF LEUCINE ZIPPER PROTEIN 1.
PTK7	IPI00168813	human	Tumor only										4	3	-0.970854	0	2	2			No	56	52.9696	No	cell;cytoplasm;"GO:0005737,IDA"	PTK7 PROTEIN TYROSINE KINASE 7 ISOFORM C PRECURSOR.
XPO5	IPI00640703	human	Tumor only										7	6			12	8	-0.226509	0.07	No	71	44.117	No	nucleus;cytoplasm;	ISOFORM 1 OF EXPORTIN-5.
RAB1A	IPI00185217	human	Tumor only										7	3							No	10	45.8109	No	endoplasmicreticulum;Golgiapparatus;	ISOFORM 3 OF RAS-RELATED PROTEIN RAB-1A.
FBLIM1	IPI00290638 ; IPI00291238 ; IPI00386562 ; IPI00647013	human	Tumor only										4	3	0.785875	0.02	1	1			No	16.6667	51.3051	No	plasmamembrane;cytoskeleton;cytoplasm;	ISOFORM 3 OF FILAMIN-BINDING LIM PROTEIN 1.
PIR	IPI00012575	human	Tumor only										9	6	0.0439433	0.01	2	1			No	20	42.261	No	nucleus;	PIRIN.
LAMB3	IPI00299404	human	Tumor only										95	32	-0.594549	0.32	273	37	-0.111031	0.13	Yes	83	57.8474	No	proteinaceousextracellularmatrix;extracellularregion;	LAMININ SUBUNIT BETA-3 PRECURSOR.
	IPI00328170	human	Tumor only										9	6			2	2			No	47	42.139	No	cell;endoplasmicreticulum;	MANNOSYL-OLIGOSACCHARIDE GLUCOSIDASE.
STAM	IPI00020178 ; IPI00607769 ; IPI00854835	human	Tumor only										4	3							No	19	33.023	No	cytoplasm;cytosol;"GO:0005829,EXP;GO:0005829,EXP;GO:0005829,EXP" /// cytosol;cytoplasm;"GO:0005829,EXP;GO:0005829,EXP;GO:0005829,EXP"	ISOFORM 1 OF SIGNAL TRANSDUCING ADAPTER MOLECULE 1.
AACS	IPI00217272 ; IPI00789348	human	Tumor only										1	1			3	2	0.340075	0	No	30.5	33.2938	Yes	cytoplasm;	ISOFORM 1 OF ACETOACETYL-COA SYNTHETASE.
TJP2	IPI00003843 ; IPI00216245 ; IPI00216246 ; IPI00291668 ; IPI00332453 ; IPI00797934	human	Tumor only										2	2							No	78.6	53.1728	No	plasmamembrane;cytoplasm;nucleus;"GO:0005737,IDA" /// plasmamembrane;nucleus;cytoplasm;"GO:0005737,IDA" /// plasmamembrane;cytoplasm;"GO:0005737,IDA;GO:0005886,IDA;GO:0005886,IDA"	ISOFORM A1 OF TIGHT JUNCTION PROTEIN ZO-2.
2010-09-02	IPI00014177 ; IPI00871851	human	Tumor only										21	8	-0.0426443	0	28	7	-0.632268	0	No	23.5	40.1685	No	cytoplasm;proteincomplex;nucleus;cytoskeleton;"GO:0005634,IDA;GO:0005737,IDA" /// proteincomplex;cytoskeleton;cytoplasm;	SEPTIN-2.
	IPI00479058	human	Tumor only										17	3			13	2			No	8	48.0716	No	nucleoplasm;cytosol;nucleus;intracellular;ribosome;"GO:0005829,EXP;GO:0005840,IDA;GO:0005829,IDA;GO:0005840,IDA;GO:0005829,IDA"	UNCHARACTERIZED PROTEIN ENSP00000260968.
FN1	IPI00411462	human	Tumor only										44	7	-0.0143553	0.1	54	9	-0.189034	0.12	Yes	32	40.0492	No	proteinaceousextracellularmatrix;plasmamembrane;extracellularregion;cytoplasm;cytoplasmicmembrane-boundedvesicle;"GO:0005576,EXP;GO:0005737,IDA;GO:0016023,EXP"	ISOFORM 2 OF FIBRONECTIN PRECURSOR.
RNPS1	IPI00033561 ; IPI00479871	human	Tumor only										5	3			7	2			No	18	128.06	No	nucleoplasm;nucleus;cytoplasm;	ISOFORM 1 OF RNA-BINDING PROTEIN WITH SERINE-RICH DOMAIN 1.
SMN1;SMN2	IPI00003394 ; IPI00009597 ; IPI00009598 ; IPI00219360 ; IPI00887083	human	Tumor only										4	3	-0.613532	0.56					No	11.5	45.2431	No	cytoplasm;nucleoplasm;cytosol;nucleus;"GO:0005654,EXP;GO:0005829,EXP" /// nucleoplasm;cytosol;nucleus;cytoplasm;"GO:0005654,EXP;GO:0005829,EXP"	ISOFORM SMN OF SURVIVAL MOTOR NEURON PROTEIN.
	IPI00455401	human	Tumor only														15	2	1.47393	0.11	not annotated	9	39.4674	Yes		TROPOMYOSIN 3 PSEUDOGENE.
HNRNPF	IPI00003881	human	Tumor only										78	8	0.599462	0.08	40	7	0.0892673	0	No	22	37.8839	Yes	nucleus;	HETEROGENEOUS NUCLEAR RIBONUCLEOPROTEIN F.
APOO	IPI00042580 ; IPI00797546 ; IPI00843886	human	Tumor only										3	2	-0.201634	0					Yes	13.5	45.835	No	cell;mitochondrion;extracellularregion;cytoplasm;"GO:0005737,IDA;GO:0005737,IDA;GO:0005739,IDA;GO:0005739,IDA"	ISOFORM 1 OF APOLIPOPROTEIN O PRECURSOR.
ZNF313	IPI00032955	human	Tumor only										3	2							No	18	50.8715	No	intracellular;	ZINC FINGER PROTEIN 313.
GLRX	IPI00219025	human	Tumor only										21	4	0.0291463	0.15	11	3	0.217591	0.07	No	8	43.7179	No	cytosol;cytoplasm;	GLUTAREDOXIN-1.
BIN1	IPI00186966 ; IPI00220586 ; IPI00220587 ; IPI00220996 ; IPI00220997 ; IPI00220998 ; IPI00220999 ; IPI00221000 ; IPI00221001 ; IPI00329733 ; IPI00395680	human	Tumor only										5	4			3	2			No	30	50.8934	No	nucleus;cytoskeleton;cytoplasm;"GO:0005737,IDA;GO:0005737,IDA;GO:0005737,IDA;GO:0005737,IDA;GO:0005737,IDA;GO:0005737,IDA;GO:0005737,IDA"	ISOFORM IIA OF MYC BOX-DEPENDENT-INTERACTING PROTEIN 1.
HTRA1	IPI00003176	human	Tumor only										6	3	0.736966	0	1	1			Yes	26	43.3029	No	extracellularspace;extracellularregion;	SERINE PROTEASE HTRA1 PRECURSOR.
RAB6B	IPI00016891	human	Tumor only										3	2							No	17	45.2284	No	cell;Golgiapparatus;	RAS-RELATED PROTEIN RAB-6B.
NUFIP1	IPI00017630	human	Tumor only										2	2							No	25	59.4426	No	intracellular;cellular_component;ribosome;nucleoplasm;nucleolus;cytosol;proteincomplex;nuclearchromosome;nucleus;"GO:0000228,IDA;GO:0005730,IDA;GO:0005654,IDA;GO:0043234,IDA;GO:0005634,IDA;GO:0005840,IDA;GO:0005829,IDA;GO:0005575,IDA"	NUCLEAR FRAGILE X MENTAL RETARDATION-INTERACTING PROTEIN 1.
TTC1	IPI00016912	human	Tumor only										7	3	0.168123	0.05	1	1			not annotated	21	62.7127	No		TETRATRICOPEPTIDE REPEAT PROTEIN 1.
RCN1	IPI00015842	human	Tumor only										22	6			20	6			No	15	36.313	Yes	intracellular;organelle;endoplasmicreticulum;	RETICULOCALBIN-1 PRECURSOR.
NCLN	IPI00470649 ; IPI00607732	human	Tumor only										5	4			1	1			No	29	41.219	No	cell;nucleus;endoplasmicreticulum;"GO:0005634,IDA"	ISOFORM 1 OF NICALIN PRECURSOR.
TRIM72	IPI00301028 ; IPI00789174	human	Tumor only										2	2			2	1			No	20	51.8439	No	intracellular;	ISOFORM 1 OF TRIPARTITE MOTIF-CONTAINING PROTEIN 72.
HMOX1	IPI00215893 ; IPI00877645	human	Tumor only										3	2			3	1			Yes	15.5	53.6947	No	extracellularspace;cell;nucleus;endoplasmicreticulum;	HEME OXYGENASE 1.
RAB27B	IPI00010491	human	Tumor only										3	2			1	1			No	17	22.7468	Yes	cell;Golgiapparatus;	RAS-RELATED PROTEIN RAB-27B.
CALU	IPI00045396	human	Tumor only										27	9			62	8			Yes	19	35.8429	Yes	intracellular;organelle;extracellularregion;endoplasmicreticulum;cytoplasmicmembrane-boundedvesicle;Golgiapparatus;"GO:0005783,IDA"	ISOFORM 2 OF CALUMENIN PRECURSOR.
CNN1	IPI00021264	human	Tumor only										2	2	1.4344	0					not annotated	21	39.5613	Yes		CALPONIN-1.
MRPL4	IPI00023334 ; IPI00107137	human	Tumor only														4	3			No	20.5	51.1833	No	intracellular;ribosome;mitochondrion; /// mitochondrion;intracellular;ribosome;	ISOFORM 1 OF MITOCHONDRIAL 39S RIBOSOMAL PROTEIN L4.
PAWR	IPI00001871	human	Tumor only										6	3			2	1			No	19	61.5073	No	cytoplasm;nucleus;	PRKC APOPTOSIS WT1 REGULATOR PROTEIN.
PSMC4	IPI00020042	human	Tumor only										22	11	0.234465	0.02	18	9	0.120294	0	No	23	35.5526	Yes	intracellular;cytoplasm;cytosol;nucleus;proteincomplex;	ISOFORM 1 OF 26S PROTEASE REGULATORY SUBUNIT 6B.
C11orf31	IPI00218054	human	Tumor only										3	2			2	2			not annotated	7	47.2467	No		SELENOPROTEIN H.
FHL2	IPI00396967 ; IPI00743342	human	Tumor only										4	3	-0.189034	0.06					No	28	45.7151	No	nucleus; /// plasmamembrane;nucleus;cytoskeleton;cytoplasm;"GO:0005856,IDA;GO:0005886,IDA"	FHL2 ISOFORM 5.
NDUFA5	IPI00412545 ; IPI00554681	human	Tumor only										10	5	-0.485427	0	13	3	-0.0840643	0.01	No	9.5	37.7345	Yes	mitochondrion; /// cell;proteincomplex;mitochondrion;	PUTATIVE UNCHARACTERIZED PROTEIN DKFZP781K1356.
PPP2R1A	IPI00554737	human	Tumor only										62	14	0.0740006	0.06	56	14	0.120294	0.04	No	42	43.3063	No	cell;cytosol;nucleus;proteincomplex;mitochondrion;cytoskeleton;intracellular;	SERINE/THREONINE-PROTEIN PHOSPHATASE 2A 65 KDA REGULATORY SUBUNIT A ALPHA ISOFORM.
MAT2A	IPI00010157	human	Tumor only										5	4	0.785875	0	6	3			not annotated	25	38.4137	Yes		S-ADENOSYLMETHIONINE SYNTHETASE ISOFORM TYPE-2.
SNRP70	IPI00219483 ; IPI00219484	human	Tumor only										2	1	-0.505891	0	4	3	-1.21412	0.02	No	19	59.9205	No	nucleus;"GO:0005634,IDA"	ISOFORM 2 OF U1 SMALL NUCLEAR RIBONUCLEOPROTEIN 70 KDA.
TGM2	IPI00294578 ; IPI00871843	human	Tumor only														34	7	-0.163499	0.09	not annotated	38.5	43.5073	No		ISOFORM 1 OF PROTEIN-GLUTAMINE GAMMA-GLUTAMYLTRANSFERASE 2.
DBT	IPI00003944 ; IPI00644810	human	Tumor only														2	2			No	30.5	31.535	Yes	proteincomplex;mitochondrion; /// mitochondrion;	LIPOAMIDE ACYLTRANSFERASE COMPONENT OF BRANCHED-CHAIN ALPHA-KETO ACID DEHYDROGENASE COMPLEX, MITOCHONDRIAL PRECURSOR.
TWF1	IPI00183508 ; IPI00385754 ; IPI00815767 ; IPI00878175	human	Tumor only										10	5			3	2			No	24.75	42.7426	No	cytoskeleton;intracellular;cytoplasm;	TWINFILIN 1.
SGTA	IPI00013949	human	Tumor only										3	2	0.535332	0.03	1	1			No	14	53.9827	No	cellular_component;cytoplasm;"GO:0005737,IDA"	SMALL GLUTAMINE-RICH TETRATRICOPEPTIDE REPEAT-CONTAINING PROTEIN ALPHA.
TBCB	IPI00293126 ; IPI00798211	human	Tumor only										7	4	0.0291463	0	2	1			No	16.5	48.1844	No	cytoskeleton;cytoplasm;	TUBULIN FOLDING COFACTOR B.
HNRNPM	IPI00171903 ; IPI00383296	human	Tumor only										60	14	0.217591	0.02	33	8			No	57	38.8051	Yes	plasmamembrane;nucleus;"GO:0005634,IDA"	ISOFORM 1 OF HETEROGENEOUS NUCLEAR RIBONUCLEOPROTEIN M.
PROSC	IPI00016346	human	Tumor only										6	4							No	22	33.9604	Yes	intracellular;cytoplasm;"GO:0005622,IDA"	PROLINE SYNTHETASE CO-TRANSCRIBED BACTERIAL HOMOLOG PROTEIN.
PALMD	IPI00015578 ; IPI00807440	human	Tumor only										3	2							No	30	62.1581	No	cell;cytoplasm;	ISOFORM 1 OF PALMDELPHIN.
AVEN	IPI00006904	human	Tumor only										2	2							No	24	57.5975	No	intracellular;cell;"GO:0005622,IDA;GO:0005623,IDA"	CELL DEATH REGULATOR AVEN.
GSTK1	IPI00219673 ; IPI00440703	human	Tumor only										3	2			8	6			No	18.5	46.1876	No	intracellular;cellenvelope;peroxisome;"GO:0005622,IDA" /// mitochondrion;cellenvelope;	GLUTATHIONE S-TRANSFERASE KAPPA 1.
	IPI00062151	human	Tumor only										24	2			33	2			No	18	47.1912	No	intracellular;ribosome;	SIMILAR TO 60S RIBOSOMAL PROTEIN L15.
TFG	IPI00294619 ; IPI00788849	human	Tumor only										19	4			10	3			No	13	59.7887	No	cytoplasm;	PROTEIN TFG.
ITGB4	IPI00027422 ; IPI00220845 ; IPI00220846 ; IPI00220847	human	Tumor only										147	36	-0.62293	0.24	159	39	-0.189034	0.27	No	108	44.4376	No	cell;plasmamembrane;proteincomplex;	ISOFORM BETA-4C OF INTEGRIN BETA-4 PRECURSOR.
COL5A1	IPI00477611 ; IPI00552815 ; IPI00844090	human	Tumor only										5	3			2	2			Yes	69	33.0885	Yes	proteinaceousextracellularmatrix; /// proteinaceousextracellularmatrix;extracellularregion;	184 KDA PROTEIN.
IFI16	IPI00003443 ; IPI00217474 ; IPI00217475 ; IPI00384836 ; IPI00642094 ; IPI00643081	human	Tumor only										5	3			10	4			No	39	25.3858	Yes	cytoplasm;nucleolus;nucleoplasm;nucleus;"GO:0005634,IDA;GO:0005634,IDA;GO:0005634,IDA;GO:0005634,IDA;GO:0005654,IDA;GO:0005730,IDA;GO:0005730,IDA;GO:0005730,IDA;GO:0005730,IDA;GO:0005737,IDA;GO:0005737,IDA;GO:0005737,IDA;GO:0005737,IDA" /// nucleolus;nucl	ISOFORM 1 OF GAMMA-INTERFERON-INDUCIBLE PROTEIN IFI-16.
FIP1L1	IPI00008449 ; IPI00395337 ; IPI00657863 ; IPI00658114	human	Tumor only										4	2							No	23.6667	61.3211	No	nucleus;	ISOFORM 3 OF PRE-MRNA 3'-END-PROCESSING FACTOR FIP1.
RAP1GDS1	IPI00607591 ; IPI00855727 ; IPI00855767	human	Tumor only										10	5	0.168123	0	8	4	0.104697	0.01	No	42	34.1586	Yes	cellular_component;	ISOFORM 1 OF RAP1 GTPASE-GDP DISSOCIATION STIMULATOR 1.
NUP155	IPI00026625 ; IPI00376609	human	Tumor only														4	3			No	71.5	46.3267	No	cell;proteincomplex;nucleus;nuclearenvelope;	ISOFORM 1 OF NUCLEAR PORE COMPLEX PROTEIN NUP155.
ANXA3	IPI00024095 ; IPI00745868	human	Tumor only										27	10	-0.226509	0.14	39	10	0.0588937	0.06	No	30	31.9208	Yes	cytoplasm;	ANNEXIN A3.
ACBD3	IPI00009315	human	Tumor only										4	2			10	1			No	29	75.5515	No	cell;mitochondrion;Golgiapparatus;	GOLGI RESIDENT PROTEIN GCP60.
KIAA1598	IPI00448751 ; IPI00854567 ; IPI00854700 ; IPI00854856 ; IPI00873465	human	Tumor only										4	4	0.217591	0					No	41.6	60.4123	No	cell;	ISOFORM 3 OF SHOOTIN-1.
WDR42A	IPI00290071 ; IPI00640954 ; IPI00854775	human	Tumor only										2	2	1.2863	0					not annotated	25.3333	55.7635	No		ISOFORM 1 OF WD REPEAT-CONTAINING PROTEIN 42A.
API5	IPI00006684 ; IPI00554742 ; IPI00555572 ; IPI00555743 ; IPI00855856	human	Tumor only										16	7			11	5			No	33.6667	37.6894	Yes	nucleus;cytoplasm;	58 KDA PROTEIN.
DIABLO	IPI00008418 ; IPI00148255 ; IPI00219865 ; IPI00789460 ; IPI00794003	human	Tumor only														2	2			No	14.8	45.5626	No	cytosol;mitochondrion;"GO:0005829,EXP" /// mitochondrion;	DIABLO HOMOLOG, MITOCHONDRIAL PRECURSOR.
DERA	IPI00219677	human	Tumor only										2	2							No	26	37.4135	Yes	cytoplasm;	PUTATIVE DEOXYRIBOSE-PHOSPHATE ALDOLASE.
PC	IPI00299402	human	Tumor only										16	10			34	15	0.286304	0	No	80	39.0218	Yes	mitochondrion;cytoplasm;"GO:0005739,IDA;GO:0005739,EXP"	PYRUVATE CARBOXYLASE, MITOCHONDRIAL PRECURSOR.
FAM98B	IPI00167572 ; IPI00760837	human	Tumor only										12	6	-0.137504	0	3	3	0.251539	0	not annotated	29	45.2833	No		PROTEIN FAM98B.
PPM1F	IPI00291412 ; IPI00877996 ; IPI00878160 ; IPI00878193	human	Tumor only										2	2			5	3			No	15.25	48.3422	No	cell;proteincomplex;	PROTEIN PHOSPHATASE 1F.
GPC1	IPI00015688 ; IPI00556267 ; IPI00892532 ; IPI00892648 ; IPI00892905 ; IPI00893155	human	Tumor only										11	7	-0.189034	0	23	8	0.0892673	0.03	Yes	22	35.7328	No	extracellularspace;extracellularregion;proteinaceousextracellularmatrix;cell;plasmamembrane;	GLYPICAN-1 PRECURSOR.
CDIPT	IPI00645518 ; IPI00647250	human	Tumor only										3	3							No	8	33.3189	Yes	cell;plasmamembrane;endoplasmicreticulum;Golgiapparatus;	ISOFORM 1 OF CDP-DIACYLGLYCEROL--INOSITOL 3-PHOSPHATIDYLTRANSFERASE.
LAMA1	IPI00375294	human	Tumor only										4	2							Yes	172	41.2104	No	proteinaceousextracellularmatrix;proteincomplex;extracellularregion;	LAMININ SUBUNIT ALPHA-1 PRECURSOR.
SRA1	IPI00102313	human	Tumor only										2	2							No	15	73.4712	No	cell;nucleoplasm;proteincomplex;nucleus;intracellular;cytoplasm;"GO:0005634,IDA;GO:0005622,IPI"	ISOFORM 1 OF STEROID RECEPTOR RNA ACTIVATOR 1.
DCUN1D1	IPI00291893 ; IPI00749447	human	Tumor only										2	1			2	2	0.643856	0	No	16	35.988	Yes	cellular_component;	DCN1-LIKE PROTEIN 1.
LYCAT	IPI00419643 ; IPI00456786	human	Tumor only										4	2			3	2			No	24.5	48.6053	No	cell;endoplasmicreticulum; /// endoplasmicreticulum;	ISOFORM 1 OF LYSOCARDIOLIPIN ACYLTRANSFERASE.
	IPI00888595	human	Tumor only										14	3							not annotated	21	33.3994	Yes		SIMILAR TO MCG50656.
MRPL55	IPI00419626 ; IPI00472663 ; IPI00640399	human	Tumor only										3	1			8	2			No	13	65.3024	No	mitochondrion;ribosome;	ISOFORM 2 OF 39S RIBOSOMAL PROTEIN L55, MITOCHONDRIAL PRECURSOR.
RHOA	IPI00478231	human	Tumor only										17	5	0.268817	0.08	23	6	0.184425	0.01	No	15	51.7332	No	plasmamembrane;cytosol;nucleus;cytoskeleton;intracellular;cytoplasm;	TRANSFORMING PROTEIN RHOA PRECURSOR.
IAH1	IPI00419194 ; IPI00432867 ; IPI00871678	human	Tumor only										1	1			2	2			not annotated	14.5	33.4073	Yes		ISOAMYL ACETATE-HYDROLYZING ESTERASE 1 HOMOLOG.
ITPR2;ITPR1	IPI00031545 ; IPI00218658 ; IPI00218659 ; IPI00218660 ; IPI00218661 ; IPI00218662 ; IPI00218663 ; IPI00218664 ; IPI00333753	human	Tumor only										2	2	0.785875	0					No	179.8	40.1933	No	cell;plasmamembrane;endoplasmicreticulum; /// cell;plasmamembrane;intracellular;organelle;endoplasmicreticulum;"GO:0043226,EXP;GO:0005622,EXP;GO:0043226,EXP;GO:0005622,EXP"	ISOFORM LONG OF INOSITOL 1,4,5-TRISPHOSPHATE RECEPTOR TYPE 2.
MARCKSL1	IPI00641181	human	Tumor only										2	2			11	3			No	7	64.5477	No	plasmamembrane;"GO:0005886,IDA"	MARCKS-RELATED PROTEIN.
GRIPAP1	IPI00423384	human	Tumor only										3	3							No	43	67.3056	No	cellular_component;endosome;	ISOFORM 3 OF GRIP1-ASSOCIATED PROTEIN 1.
TCOF1	IPI00165041 ; IPI00298696 ; IPI00555853 ; IPI00815713 ; IPI00815731 ; IPI00815944	human	Tumor only										4	3	-0.226509	0	3	2			No	86.6	63.2231	No	nucleolus;nucleus;"GO:0005730,IDA"	TREACHER COLLINS-FRANCESCHETTI SYNDROME 1 ISOFORM A.
CTSB	IPI00295741	human	Tumor only										35	6	1.152	0.03	24	4	0.862496	0.04	No	16	31.2466	Yes	mitochondrion;intracellular;lysosome;cytoplasmicmembrane-boundedvesicle;	CATHEPSIN B PRECURSOR.
HINT2	IPI00000335	human	Tumor only										5	3	0.217591	0.04	2	2			Yes	13	42.8976	No	extracellularregion;mitochondrion;	HISTIDINE TRIAD NUCLEOTIDE-BINDING PROTEIN 2.
AIP	IPI00010460 ; IPI00847662	human	Tumor only										4	2	0.251539	0	2	2			No	28	37.4033	No	cytoplasm;cell;cytosol;nucleus;"GO:0005634,IDA" /// cell;"GO:0005634,IDA"	AH RECEPTOR-INTERACTING PROTEIN.
HNRNPR	IPI00856038	human	Tumor only										22	11	0.0740006	0.02	15	7	0.168123	0	No	43	39.9324	Yes	intracellular;	HETEROGENEOUS NUCLEAR RIBONUCLEOPROTEIN-R2.
TPP1	IPI00298237 ; IPI00554538 ; IPI00554617	human	Tumor only										8	4			8	4			No	16.5	41.5356	No	cell;mitochondrion;lysosome;cytoplasmicmembrane-boundedvesicle;"GO:0005623,IDA;GO:0005764,IDA;GO:0005764,IMP"	ISOFORM 1 OF TRIPEPTIDYL-PEPTIDASE 1 PRECURSOR.
PGM3	IPI00030116 ; IPI00643166	human	Tumor only										8	5	0.454032	0	2	2			No	30.5	33.9443	Yes	cellular_component;	ISOFORM 1 OF PHOSPHOACETYLGLUCOSAMINE MUTASE.
	IPI00478002	human	Tumor only										16	4	0.0439433	0.08	12	4	-0.226509	0.06	No	23	17.7835	Yes	intracellular;ribosome;	UNCHARACTERIZED PROTEIN ENSP00000353405.
IARS	IPI00013234 ; IPI00644127 ; IPI00877938	human	Tumor only										13	9	1.32193	0.13	18	8	0.514573	0.09	No	71	37.2235	Yes	cell;cytoplasm; /// cytoplasm;	IARS PROTEIN.
SFXN3	IPI00793874 ; IPI00871988	human	Tumor only										3	3			5	5			No	20	42.5397	No	cell;mitochondrion; /// cell;mitochondrion;"GO:0005739,IDA"	SIDEROFLEXIN 3.
TXNDC17	IPI00646689 ; IPI00789285 ; IPI00797323	human	Tumor only										18	5	-1.61353	1.87	14	4	-0.545968	0.89	No	7.66667	23.575	Yes	cytosol;cytoplasm;"GO:0005829,IDA"	THIOREDOXIN DOMAIN-CONTAINING PROTEIN 17.
EIF3F	IPI00654777	human	Tumor only										20	7			11	4			No	17	48.8102	No	proteincomplex;cytosol;cytoplasm;"GO:0005829,EXP"	EUKARYOTIC TRANSLATION INITIATION FACTOR 3 SUBUNIT 5.
PPP1R2	IPI00220402 ; IPI00410126 ; IPI00789386 ; IPI00794579	human	Tumor only										5	2			1	1			not annotated	9.33333	38.3753	No		PROTEIN PHOSPHATASE INHIBITOR 2.
ANXA6	IPI00002459 ; IPI00221226	human	Tumor only										20	8	0.836501	0.07	17	8			No	58	36.5909	Yes	cytoplasm;"GO:0005737,IDA" /// cytoplasm;cytoplasmicmembrane-boundedvesicle;	ANNEXIN VI ISOFORM 2.
MTX1	IPI00013678 ; IPI00394889	human	Tumor only										2	2			2	2			No	35	67.6492	No	cell;mitochondrion;	METAXIN 1 ISOFORM 1.
CDC37	IPI00013122	human	Tumor only										10	2			12	2			No	30	49.436	No	cytoplasm;cytosol;	HSP90 CO-CHAPERONE CDC37.
UMPS	IPI00003923 ; IPI00398067	human	Tumor only										2	2			2	2	0.104697	0	No	26	27.0421	Yes	cytosol;"GO:0005829,EXP"	ISOFORM 1 OF URIDINE 5'-MONOPHOSPHATE SYNTHASE.
DYNC1LI1	IPI00007675	human	Tumor only										2	2	-0.189034	0	5	3	-0.111031	0	No	39	43.2803	No	proteincomplex;cytoskeleton;	CYTOPLASMIC DYNEIN 1 LIGHT INTERMEDIATE CHAIN 1.
GALE	IPI00030229 ; IPI00553131 ; IPI00641123 ; IPI00644339 ; IPI00644364	human	Tumor only										3	1			12	4			No	14.25	21.1225	Yes	cytosol;nucleus;cytoplasm;"GO:0005634,IDA;GO:0005737,IDA;GO:0005829,EXP"	UDP-GALACTOSE-4-EPIMERASE.
PGLS	IPI00029997	human	Tumor only										7	5			10	7	0.415037	0.04	not annotated	15	51.6287	No		6-PHOSPHOGLUCONOLACTONASE.
SNAP23	IPI00010438 ; IPI00216231	human	Tumor only										5	2			2	2			No	14	42.8953	No	cellular_component;plasmamembrane;cell;cytoplasm;nucleus;"GO:0005634,IDA;GO:0005737,IDA" /// plasmamembrane;cell;nucleus;cellular_component;cytoplasm;"GO:0005634,IDA;GO:0005737,IDA"	ISOFORM SNAP-23A OF SYNAPTOSOMAL-ASSOCIATED PROTEIN 23.
PSAP	IPI00012503 ; IPI00219825 ; IPI00744835 ; IPI00873020 ; IPI00873201	human	Tumor only										21	6	0.713119	0.07	37	7	0.251539	0.05	Yes	34	46.5946	No	extracellularspace;cell;lysosome;Golgiapparatus;"GO:0005794,IDA;GO:0005794,IDA" /// mitochondrion;lysosome;Golgiapparatus;"GO:0005794,IDA" /// lysosome;Golgiapparatus;"GO:0005794,IDA"	ISOFORM SAP-MU-0 OF PROACTIVATOR POLYPEPTIDE PRECURSOR.
EPPK1	IPI00010951	human	Tumor only										242	49	0.358454	0.05	449	52	0.168123	0.12	No	336	41.8926	No	cytoplasm;cytoskeleton;	EPIPLAKIN.
CKM	IPI00027487	human	Tumor only										18	7			53	5			No	28	33.3811	Yes	cytosol;cytoplasm;"GO:0005829,EXP"	CREATINE KINASE M-TYPE.
TSNAX	IPI00293350	human	Tumor only										5	5	0.862496	0	3	3			No	23	41.811	No	nucleus;cytoplasm;	TRANSLIN-ASSOCIATED PROTEIN X.
PYGL	IPI00783313	human	Tumor only										74	18	0.234465	0.05	64	19	0.251539	0.06	No	63	33.9302	Yes	plasmamembrane;cell;nucleus;cytoplasm;"GO:0005634,IDA;GO:0005737,IDA;GO:0005886,IDA"	GLYCOGEN PHOSPHORYLASE, LIVER FORM.
	IPI00886871	human	Tumor only										15	3	0.200913	0.01	10	2	0.0439433	0.09	not annotated	26	58.1426	No		SIMILAR TO RIBOSOMAL PROTEIN L12.
FAM83H	IPI00886907	human	Tumor only														35	15	0.736966	0	not annotated	57	65.1239	No		PROTEIN OF UNKNOWN FUNCTION DUF1669 FAMILY PROTEIN.
SPRR3	IPI00082931 ; IPI00642247	human	Tumor only										2	2							No	18	87.1539	No	cytoplasm;	SMALL PROLINE-RICH PROTEIN 3.
MRPS7	IPI00006440	human	Tumor only										3	3			2	2	-0.176323	0	No	22	62.0236	No	intracellular;ribosome;cytosol;mitochondrion;	28S RIBOSOMAL PROTEIN S7, MITOCHONDRIAL PRECURSOR.
NQO1	IPI00012069 ; IPI00619898 ; IPI00619966	human	Tumor only										7	4			12	4			No	14.6667	34.4829	Yes	cytoplasm;	NAD.
	IPI00023532 ; IPI00103027	human	Tumor only										3	2	1.39593	0					No	42	52.8054	No	proteincomplex;"GO:0043234,IDA"	ISOFORM 1 OF SPATS2-LIKE PROTEIN.
	IPI00006379	human	Tumor only										14	7			2	2			No	33	37.965	Yes	nucleolus;nucleus;	NUCLEOLAR PROTEIN 5.
FER1L3	IPI00021048 ; IPI00645867	human	Tumor only										45	20	-0.0976108	0.08	55	25	0.0439433	0.05	No	145	40.5547	No	cell;plasmamembrane;nucleus;nuclearenvelope;	ISOFORM 1 OF MYOFERLIN.
GOLGA2	IPI00413895 ; IPI00747042	human	Tumor only										2	2							No	52.5	52.8649	No	cell;Golgiapparatus;"GO:0005794,IDA"	GOLGIN SUBFAMILY A MEMBER 2.
CDH1	IPI00000513 ; IPI00025861 ; IPI00744889	human	Tumor only										26	5			20	6			No	29	35.427	Yes	cell;plasmamembrane;cytoplasm;Golgiapparatus;"GO:0005737,IDA;GO:0005794,IDA;GO:0005886,IDA;GO:0005886,IDA;GO:0005886,IDA" /// cell;plasmamembrane;cytoplasm;cytoskeleton;Golgiapparatus;"GO:0005737,IDA;GO:0005794,IDA;GO:0005886,EXP;GO:0005886,IDA;GO:0005886	E-CADHERIN.
CCT6A	IPI00027626	human	Tumor only										38	8	-0.201634	0.12	44	11	-0.0143553	0.06	No	37	31.393	Yes	proteincomplex;cytosol;cytoplasm;	T-COMPLEX PROTEIN 1 SUBUNIT ZETA.
MTCH2	IPI00003833	human	Tumor only										16	7	-0.0285692	0.14	18	6	-0.0426443	0.06	No	18	44.1419	No	cell;mitochondrion;	MITOCHONDRIAL CARRIER HOMOLOG 2.
PLS1	IPI00032304 ; IPI00789401	human	Tumor only										6	3			20	4			No	37	34.8469	Yes	cytoplasm;	PLASTIN-1.
MFAP2	IPI00022621 ; IPI00644827	human	Tumor only										16	2	0.577767	0.08	12	3	0.514573	0.08	Yes	8	65.8374	No	extracellularregion;proteinaceousextracellularmatrix; /// proteinaceousextracellularmatrix;	MICROFIBRILLAR-ASSOCIATED PROTEIN 2 PRECURSOR.
C1orf123	IPI00016605 ; IPI00514522	human	Tumor only										3	2			2	2			No	10	33.4094	No	cellular_component;	UNCHARACTERIZED PROTEIN C1ORF123.
P4HB	IPI00010796	human	Tumor only										65	16	-0.111031	0	99	16			Yes	44	41.2319	No	intracellular;organelle;extracellularregion;plasmamembrane;cytoplasm;cell;endoplasmicreticulum;cytoplasmicmembrane-boundedvesicle;"GO:0005737,IDA;GO:0005623,IDA"	PROTEIN DISULFIDE-ISOMERASE PRECURSOR.
DYNC1LI2	IPI00011592	human	Tumor only										7	7	-0.0703893	0.04	7	5	0.217591	0.09	No	33	49.5961	No	proteincomplex;cytoskeleton;	CYTOPLASMIC DYNEIN 1 LIGHT INTERMEDIATE CHAIN 2.
AK3L1;AK3L2	IPI00016568 ; IPI00738805 ; IPI00787868	human	Tumor only										1	1			11	5			No	15	40.87	No	mitochondrion;	ADENYLATE KINASE ISOENZYME 4, MITOCHONDRIAL.
	IPI00443534	human	Tumor only										6	2			3	2			not annotated	9	57.7923	No		CDNA FLJ46889 FIS, CLONE UTERU3017995, HIGHLY SIMILAR TO HOMO SAPIENS LIKELY ORTHOLOG OF RAT P47.
PITRM1	IPI00219613 ; IPI00553109 ; IPI00787827	human	Tumor only										9	3	0.514573	0	8	6	0.104697	0	No	42.5	40.0594	No	nucleus;mitochondrion;"GO:0005634,IDA;GO:0005739,IDA"	ISOFORM 1 OF PRESEQUENCE PROTEASE, MITOCHONDRIAL PRECURSOR.
GSTP1	IPI00219757 ; IPI00793319	human	Tumor only										116	8	-0.0565835	0	207	7	0.0892673	0.05	No	11.5	32.5972	Yes	cytoplasm;	GLUTATHIONE S-TRANSFERASE P.
CTPS	IPI00290142	human	Tumor only										9	4	-0.378512	0	13	4	-0.163499	0	No	36	40.8254	No	cytosol;cellular_component;"GO:0005829,EXP"	CTP SYNTHASE 1.
GLOD4	IPI00007102 ; IPI00032575 ; IPI00745272	human	Tumor only										4	3	0.358454	0	3	2			No	27.6667	30.3572	Yes	mitochondrion;	UNCHARACTERIZED PROTEIN C17ORF25.
NOL6	IPI00152890 ; IPI00157845 ; IPI00291903 ; IPI00556218	human	Tumor only														2	2			No	47.6667	45.8871	No	nucleolus;nucleus;intracellular;nuclearchromosome;	ISOFORM 1 OF NUCLEOLAR PROTEIN 6.
HARS	IPI00021808	human	Tumor only										9	5	-1.79909	0	4	4	-0.9855	0	No	43	35.6497	Yes	cytoplasm;	HISTIDYL-TRNA SYNTHETASE, CYTOPLASMIC.
HINT1	IPI00239077	human	Tumor only										31	4	0.268817	0.04	24	5	0.251539	0.03	No	9	38.9992	Yes	nucleus;cytoskeleton;cytoplasm;	HISTIDINE TRIAD NUCLEOTIDE-BINDING PROTEIN 1.
DBNL	IPI00101968 ; IPI00396437 ; IPI00456925	human	Tumor only										21	7	0.434403	0.09	7	4			No	26	63.7498	No	cell;cytoskeleton;intracellular;cytoplasm;	ISOFORM 3 OF DREBRIN-LIKE PROTEIN.
ATP1B3	IPI00008167 ; IPI00787965 ; IPI00788784 ; IPI00789521	human	Tumor only										7	4			7	4			No	10.3333	30.6796	Yes	cell;plasmamembrane;cytoplasm;proteincomplex;cytoplasmicmembrane-boundedvesicle;	SODIUM/POTASSIUM-TRANSPORTING ATPASE SUBUNIT BETA-3.
C20orf3	IPI00031131 ; IPI00791304	human	Tumor only										18	5			26	8			No	22.5	39.9653	No	cell;cellular_component;	ADIPOCYTE PLASMA MEMBRANE-ASSOCIATED PROTEIN.
COL6A1	IPI00291136	human	Tumor only										7	3	0.836501	0.09	1	1			Yes	63	28.5195	Yes	proteinaceousextracellularmatrix;extracellularregion;	COLLAGEN ALPHA-1(VI) CHAIN PRECURSOR.
PDCD5	IPI00023640	human	Tumor only										11	3			4	2			not annotated	12	51.0168	No		PROGRAMMED CELL DEATH PROTEIN 5.
MYH4	IPI00001753	human	Tumor only										198	36	1.2863	0.05	435	40	-0.823749	0.17	No	150	46.7932	No	cytoplasm;proteincomplex;cytoskeleton;	MYOSIN-4.
H1FX	IPI00021924	human	Tumor only										11	4			2	2			No	16	36.2972	Yes	nucleus;chromosome;	HISTONE H1X.
PKP3	IPI00026952	human	Tumor only										73	20	0.473931	0.02	63	23	0.577767	0.03	No	55	56.3348	No	plasmamembrane;nucleus;	PLAKOPHILIN-3.
ACOT7	IPI00010415 ; IPI00219452 ; IPI00395469 ; IPI00395748 ; IPI00746126 ; IPI00883762	human	Tumor only										27	5			5	3			No	17.6667	37.0057	No	cytoplasm;mitochondrion; /// mitochondrion;cytoplasm;	ISOFORM 1 OF CYTOSOLIC ACYL COENZYME A THIOESTER HYDROLASE.
QSOX1	IPI00003590 ; IPI00465016 ; IPI00872013	human	Tumor only										1	1			2	2			Yes	49.5	48.0503	No	extracellularspace;extracellularregion;cell;Golgiapparatus;"GO:0005615,IDA;GO:0005794,IDA" /// extracellularspace;cell;extracellularregion;Golgiapparatus;"GO:0005615,IDA;GO:0005794,IDA"	ISOFORM 1 OF SULFHYDRYL OXIDASE 1 PRECURSOR.
CACYBP	IPI00395627 ; IPI00552308	human	Tumor only										10	6			18	5			No	14.5	28.4405	Yes	nucleus;cytoplasm; /// nuclearenvelope;cytoplasm;	ISOFORM 1 OF CALCYCLIN-BINDING PROTEIN.
GSS	IPI00010706	human	Tumor only										12	8			7	6	0.556393	0	not annotated	37	54.7787	No		GLUTATHIONE SYNTHETASE.
MAT2B	IPI00002324 ; IPI00181717 ; IPI00845294 ; IPI00845510	human	Tumor only										2	2							No	19.3333	41.0982	No	intracellular;proteincomplex;nucleus;"GO:0005634,IDA;GO:0005622,IDA;GO:0043234,IDA" /// proteincomplex;nucleus;intracellular;"GO:0005634,IDA;GO:0005622,IDA;GO:0043234,IDA"	ISOFORM 1 OF METHIONINE ADENOSYLTRANSFERASE 2 SUBUNIT BETA.
TRADD	IPI00018744 ; IPI00374856	human	Tumor only										3	3			1	1			No	19	53.4596	No	cytoplasm;cytosol;cytoskeleton;"GO:0005737,IDA;GO:0005829,EXP;GO:0005829,EXP"	TUMOR NECROSIS FACTOR RECEPTOR TYPE 1-ASSOCIATED DEATH DOMAIN PROTEIN.
DNTTIP2	IPI00290410	human	Tumor only														3	2			No	54	56.7008	No	nucleus;	DEOXYNUCLEOTIDYLTRANSFERASE TERMINAL-INTERACTING PROTEIN 2.
TBCE	IPI00018402	human	Tumor only										4	4			6	4			No	41	40.1972	No	cytoplasm;cytoskeleton;	TUBULIN-SPECIFIC CHAPERONE E.
SAFB2	IPI00005648 ; IPI00872777	human	Tumor only														5	3			No	49	55.2406	No	cytoplasm;nucleus;	SCAFFOLD ATTACHMENT FACTOR B2.
PPFIA1	IPI00163496 ; IPI00219754	human	Tumor only										17	8	0.152003	0.04	18	10	0.888969	0.27	No	89.5	57.5448	No	cytoplasm;	ISOFORM 1 OF LIPRIN-ALPHA-1.
SPTBN2	IPI00012645 ; IPI00218207	human	Tumor only										16	11	1.21759	0	3	3			No	183	47.5945	No	cytoplasm;cytoskeleton;"GO:0005856,IDA;GO:0005737,IDA" /// cytoskeleton;cytoplasm;"GO:0005856,IDA;GO:0005737,IDA"	ISOFORM 1 OF SPECTRIN BETA CHAIN, BRAIN 2.
SYNE2	IPI00239405 ; IPI00239406 ; IPI00239413 ; IPI00412276	human	Tumor only										1	1			3	3			No	409	55.3507	No	cell;nucleus;nuclearenvelope;cytoskeleton;cytoplasm;	ISOFORM 1 OF NESPRIN-2.
DDX39	IPI00166874	human	Tumor only														19	4	0.136062	0.01	not annotated	20	47.1099	No		DDX39 PROTEIN.
FAM110A	IPI00027758	human	Tumor only										3	2	0.37707	0.01					No	21	76.6173	No	microtubuleorganizingcenter;cytoplasm;	PROTEIN FAM110A.
TM9SF4	IPI00021985 ; IPI00885106	human	Tumor only										5	2	-0.201634	0	6	4	0.321928	0.07	No	27.5	44.5204	No	cell;	ISOFORM 1 OF TRANSMEMBRANE 9 SUPERFAMILY MEMBER 4 PRECURSOR.
SCARB2	IPI00217766	human	Tumor only										5	2			9	4			No	27	34.4155	Yes	plasmamembrane;cell;lysosome;	LYSOSOME MEMBRANE PROTEIN 2.
NAMPT	IPI00018873 ; IPI00472879	human	Tumor only										9	4			9	5			No	33.5	34.8642	Yes	cytoplasm;cytosol;"GO:0005829,EXP" /// cytoplasm;	ISOFORM 1 OF NICOTINAMIDE PHOSPHORIBOSYLTRANSFERASE.
APOA1	IPI00853525	human	Tumor only										3	2			1	1			Yes	25	49.3245	No	extracellularregion;	APOLIPOPROTEIN A1.
COX6A1	IPI00021793 ; IPI00176681	human	Tumor only										10	2			2	1			No	5	36.4624	Yes	cell;mitochondrion;	CYTOCHROME C OXIDASE POLYPEPTIDE VIA-LIVER, MITOCHONDRIAL PRECURSOR.
CYB5R1	IPI00470674 ; IPI00643530	human	Tumor only										2	2	1.51457	0	9	5	-0.863938	0	No	18.5	38.1509	Yes	cell;nucleolus;cytoplasm;"GO:0005730,IDA;GO:0005737,IDA"	NADH-CYTOCHROME B5 REDUCTASE 1.
MRPL54	IPI00332157	human	Tumor only										3	2	0.340075	0.01	1	1	0.785875	0	No	8	46.6065	No	mitochondrion;ribosome;	39S RIBOSOMAL PROTEIN 54, MITOCHONDRIAL PRECURSOR.
RAP2B	IPI00018364	human	Tumor only										5	3	-0.0285692	0	2	2			No	13	38.459	Yes	intracellular;plasmamembrane;	RAS-RELATED PROTEIN RAP-2B PRECURSOR.
HIST1H1A	IPI00217469	human	Tumor only										15	3			6	2			No	16	19.6377	Yes	nucleus;chromosome;	HISTONE H1.1.
LPP	IPI00023704 ; IPI00797120	human	Tumor only										24	6	1.12029	0.02					No	20.5	58.1298	No	cellular_component;plasmamembrane;cytoplasm;nucleus;	LIPOMA-PREFERRED PARTNER.
IGBP1	IPI00019148	human	Tumor only										2	2							No	28	51.0165	No	cytoplasm;cytoskeleton;"GO:0005856,IDA"	IMMUNOGLOBULIN-BINDING PROTEIN 1.
IDE	IPI00220373	human	Tumor only										23	12			4	3			Yes	67	41.6514	No	extracellularspace;cell;cytoplasm;peroxisome;	INSULIN-DEGRADING ENZYME.
NT5C	IPI00005573 ; IPI00386083 ; IPI00790117	human	Tumor only										5	3			6	2			No	12	39.0594	No	cytoplasm;cytosol;nucleus;"GO:0005634,IDA;GO:0005737,IDA;GO:0005829,EXP" /// cytosol;nucleus;cytoplasm;"GO:0005634,IDA;GO:0005737,IDA;GO:0005829,EXP"	ISOFORM 1 OF 5'(3')-DEOXYRIBONUCLEOTIDASE, CYTOSOLIC TYPE.
FST	IPI00021081 ; IPI00217070 ; IPI00217071	human	Tumor only										5	3	-0.83996	0.18	3	2	-0.367371	0	Yes	21.5	41.1439	No	extracellularregion;	ISOFORM 1 OF FOLLISTATIN PRECURSOR.
FLNA	IPI00302592 ; IPI00333541 ; IPI00644576	human	Tumor only										442	76	-0.250962	0.17	437	68	0.304006	0.14	No	153.5	36.2696	Yes	cytoskeleton;cytoplasm;"GO:0005737,IDA;GO:0005856,IDA" /// nucleus;cytoskeleton;cytoplasm;Golgiapparatus;"GO:0005634,IDA;GO:0005737,IDA"	FILAMIN A, ALPHA ISOFORM 1.
FGFBP1	IPI00021399	human	Tumor only										14	3	-1.26303	0.3	50	4	-0.887525	0.16	Yes	14	36.5252	Yes	extracellularspace;extracellularregion;plasmamembrane;	FIBROBLAST GROWTH FACTOR-BINDING PROTEIN 1 PRECURSOR.
SC4MOL	IPI00019899 ; IPI00556210	human	Tumor only										5	2			4	2			No	7	37.2881	Yes	cell;plasmamembrane;endoplasmicreticulum;"GO:0005783,EXP"	C-4 METHYLSTEROL OXIDASE.
ASPH	IPI00294834	human	Tumor only										10	7	0.666576	0.02	15	7			No	37	51.0908	No	cell;endoplasmicreticulum;	ASPARTYL/ASPARAGINYL BETA-HYDROXYLASE.
ITGB1	IPI00645194	human	Tumor only										24	5			54	11	-0.799087	0.17	No	41	41.1242	No	cell;plasmamembrane;proteincomplex;cellular_component;endoplasmicreticulum;"GO:0005783,IDA"	INTEGRIN BETA 1 ISOFORM 1A PRECURSOR.
;BLVRB	IPI00219910 ; IPI00783862	human	Tumor only										8	4	0.358454	0.02	13	4	0.556393	0.04	No	11.5	42.944	No	cytoplasm;	22 KDA PROTEIN.
SAP30BP	IPI00333699 ; IPI00549296 ; IPI00792209 ; IPI00794827	human	Tumor only										4	3	0.454032	0					No	14	40.2072	No	nucleus;"GO:0005634,IDA"	ISOFORM 2 OF SAP30-BINDING PROTEIN.
ATP6V1A	IPI00007682	human	Tumor only										31	10	0.666576	0	35	10	-0.0285692	0	No	42	34.3814	Yes	cell;plasmamembrane;proteincomplex;mitochondrion;	VACUOLAR ATP SYNTHASE CATALYTIC SUBUNIT A.
SDF2	IPI00293167 ; IPI00791622	human	Tumor only										6	3			2	1			Yes	10	16.8924	Yes	extracellularspace;cell;extracellularregion;	STROMAL CELL-DERIVED FACTOR 2 PRECURSOR.
	IPI00746221	human	Tumor only										7	2							not annotated	10	70.9474	No		HYPOTHETICAL PROTEIN LOC348262.
BPGM	IPI00215979	human	Tumor only										2	2			2	1	-0.0976108	0.01	not annotated	18	51.5896	No		BISPHOSPHOGLYCERATE MUTASE.
SNX3	IPI00029740	human	Tumor only										6	2							No	9	40.969	No	cytoplasm;"GO:0005737,IDA"	ISOFORM 3 OF SORTING NEXIN-3.
MGST3	IPI00024266 ; IPI00639812 ; IPI00647044	human	Tumor only										7	3			5	4	0.643856	0.04	No	8	20.3046	Yes	cell;endoplasmicreticulum;	MICROSOMAL GLUTATHIONE S-TRANSFERASE 3.
C6orf125	IPI00031617 ; IPI00514293	human	Tumor only										3	1			2	2	-0.0426443	0	not annotated	9	39.1644	No		UNCHARACTERIZED PROTEIN C6ORF125.
BGN	IPI00010790 ; IPI00643384	human	Tumor only										65	8			68	10	0.514573	0.08	Yes	24.5	38.3408	Yes	extracellularregion;proteinaceousextracellularmatrix;cytoplasm;cytoplasmicmembrane-boundedvesicle;"GO:0005737,IDA;GO:0016023,IDA"	BIGLYCAN PRECURSOR.
RBM3	IPI00024320 ; IPI00604407	human	Tumor only										20	3			13	3			not annotated	7	30.3484	Yes		PUTATIVE RNA-BINDING PROTEIN 3.
PEA15	IPI00014850 ; IPI00643342	human	Tumor only										14	4			10	3			No	9	65.4992	No	cytoplasm;proteincomplex;cytoskeleton;	ASTROCYTIC PHOSPHOPROTEIN PEA-15.
	IPI00743305	human	Tumor only														9	2	0.0439433	0.05	not annotated	12	52.1538	No		SIMILAR TO 40S RIBOSOMAL PROTEIN S17.
RPL6	IPI00329389 ; IPI00735235 ; IPI00742225 ; IPI00790342 ; IPI00867533	human	Tumor only										20	6			12	5			No	23.5	27.4602	Yes	cytosol;intracellular;ribosome;"GO:0005829,EXP" /// intracellular;ribosome;	60S RIBOSOMAL PROTEIN L6.
KLK5	IPI00032464	human	Tumor only										4	2			5	2			Yes	11	43.7696	No	extracellularspace;extracellularregion;	KALLIKREIN-5 PRECURSOR.
MRPS35	IPI00073779 ; IPI00168292 ; IPI00789140	human	Tumor only										3	2			3	2			No	21.3333	44.0177	No	mitochondrion;ribosome;	ISOFORM 1 OF 28S RIBOSOMAL PROTEIN S35, MITOCHONDRIAL PRECURSOR.
LPGAT1	IPI00022447	human	Tumor only										1	1			2	2			No	24	41.0357	No	cell;cytoplasm;endoplasmicreticulum;"GO:0005737,IDA"	ACYL-COA:LYSOPHOSPHATIDYLGLYCEROL ACYLTRANSFERASE 1.
	IPI00002352	human	Tumor only										23	4	1.39593	0.02	44	5	-1.12433	0.18	No	12	29.7302	Yes	cytoplasm;proteincomplex;cytoskeleton;	MYOSIN REGULATORY LIGHT CHAIN 2, SKELETAL MUSCLE ISOFORM.
	IPI00829914	human	Tumor only										4	1	0.340075	0.03	3	2			not annotated	8	63.3973	No		PUTATIVE UNCHARACTERIZED PROTEIN.
FER1L3	IPI00385318	human	Tumor only										38	15	-0.0565835	0.08	36	15	0.152003	0.05	No	109	38.601	Yes	cell;plasmamembrane;nucleus;nuclearenvelope;	ISOFORM 5 OF MYOFERLIN.
C15orf38	IPI00074225	human	Tumor only										6	3							not annotated	15	37.8283	Yes		UPF0552 PROTEIN C15ORF38.
C20orf27	IPI00101095 ; IPI00552634 ; IPI00552996	human	Tumor only														5	2			not annotated	12.6667	36.1914	Yes		UNCHARACTERIZED PROTEIN C20ORF27.
LRRFIP1	IPI00006207 ; IPI00382733 ; IPI00386687 ; IPI00785113 ; IPI00852682	human	Tumor only										6	3	-0.584963	0	11	6	0.0291463	0.05	No	41.8	49.8362	No	cytoplasm;nucleus;cytoskeleton;"GO:0005737,IDA" /// nucleus;cytoskeleton;cytoplasm;"GO:0005737,IDA" /// cellular_component;	ISOFORM 2 OF LEUCINE-RICH REPEAT FLIGHTLESS-INTERACTING PROTEIN 1.
PIGO	IPI00181620 ; IPI00217421	human	Tumor only										2	2			1	1			No	38.5	43.6558	No	cell;endoplasmicreticulum;	ISOFORM 2 OF GPI ETHANOLAMINE PHOSPHATE TRANSFERASE 3.
CES2	IPI00332828 ; IPI00419920	human	Tumor only														5	5			No	26.5	50.5981	No	intracellular;organelle;endoplasmicreticulum;	CARBOXYLESTERASE 2 ISOFORM 1.
SYNPO	IPI00027258 ; IPI00413058 ; IPI00413060	human	Tumor only										3	2							No	44	78.1929	No	cell;plasmamembrane;cytoskeleton;cellular_component;cytoplasm;	ISOFORM 2 OF SYNAPTOPODIN.
TPPP3	IPI00306413	human	Tumor only										5	2	-0.0285692	0.04	3	2	1.51457	0	not annotated	16	13.8591	Yes		TUBULIN POLYMERIZATION-PROMOTING PROTEIN FAMILY MEMBER 3.
EPRS	IPI00013452	human	Tumor only										43	14	0.152003	0.06	54	16	0.340075	0.05	No	107	38.1163	Yes	cytoplasm;cell;	BIFUNCTIONAL AMINOACYL-TRNA SYNTHETASE.
PITPNA	IPI00216048	human	Tumor only										7	3			1	1			No	27	40.1959	No	nucleus;intracellular;cytoplasm;"GO:0005634,IDA"	PHOSPHATIDYLINOSITOL TRANSFER PROTEIN ALPHA ISOFORM.
ACTN2	IPI00019884	human	Tumor only										129	13	-0.226509	0.06	87	18	-0.15056	0.17	No	67	43.1822	No	cell;plasmamembrane;cytoplasm;nucleolus;cytoskeleton;"GO:0005730,IDA;GO:0005886,IMP;GO:0005623,IDA"	ALPHA-ACTININ-2.
MYL1	IPI00216070 ; IPI00220332	human	Tumor only										8	2			10	3			No	12.5	33.9887	No	proteincomplex;cytoskeleton;cytoplasm;	MYOSIN LIGHT CHAIN 1, SKELETAL MUSCLE ISOFORM.
NMI	IPI00012450	human	Tumor only										2	2	0.494109	0					No	28	40.0381	No	cytoplasm;nucleus;"GO:0005634,IDA;GO:0005737,IDA"	N-MYC-INTERACTOR.
DUOX1	IPI00185038 ; IPI00719817	human	Tumor only										5	3							No	91	47.8291	No	cell;plasmamembrane;	ISOFORM 1 OF DUAL OXIDASE 1 PRECURSOR.
XRN2	IPI00100151 ; IPI00788157	human	Tumor only										10	5	-0.275007	0.07	6	2			No	58.5	50.6475	No	nucleolus;nucleus;intracellular;"GO:0005730,IDA"	ISOFORM 1 OF 5'-3' EXORIBONUCLEASE 2.
TAGLN2	IPI00550363 ; IPI00644531 ; IPI00647915	human	Tumor only										88	10	0.286304	0.09	116	9	0.454032	0.02	not annotated	15	30.0134	Yes		TRANSGELIN-2.
MCM5	IPI00018350 ; IPI00877948 ; IPI00878310	human	Tumor only										3	3							No	53.5	42.8169	No	nucleoplasm;nucleus;"GO:0005654,EXP;GO:0005654,EXP;GO:0005654,EXP;GO:0005654,EXP;GO:0005654,EXP;GO:0005654,EXP;GO:0005654,EXP" /// nucleus;	DNA REPLICATION LICENSING FACTOR MCM5.
COL6A3	IPI00022200 ; IPI00072917 ; IPI00072918 ; IPI00220701 ; IPI00376964 ; IPI00871621	human	Tumor only										17	4			19	6			Yes	198.167	39.2465	No	extracellularregion;proteinaceousextracellularmatrix; /// proteinaceousextracellularmatrix;extracellularregion;	ALPHA 3 TYPE VI COLLAGEN ISOFORM 1 PRECURSOR.
SMS	IPI00005102 ; IPI00642393 ; IPI00643452	human	Tumor only										6	5	2	0.14	2	2			not annotated	23.3333	39.9115	No		SPERMINE SYNTHASE.
SRP72	IPI00215888 ; IPI00794961	human	Tumor only										1	1			6	3			No	28.5	45.8317	No	cytoplasm; /// nucleolus;cytoplasm;"GO:0005730,IDA"	SIGNAL RECOGNITION PARTICLE 72 KDA PROTEIN.
C15orf24	IPI00024551 ; IPI00791140 ; IPI00791879 ; IPI00793489 ; IPI00795993	human	Tumor only										1	1			2	2			No	10.4	36.0759	No	cell;cytoplasm;mitochondrion;"GO:0005739,IDA"	UPF0480 PROTEIN C15ORF24 PRECURSOR.
CRIP2	IPI00006034	human	Tumor only										17	4	-0.250962	0.1	16	5	-0.176323	0.05	not annotated	11	32.3486	Yes		CYSTEINE-RICH PROTEIN 2.
UQCRC1	IPI00013847	human	Tumor only										43	11	-0.238787	0.14	55	10	0.251539	0.18	No	29	45.6742	No	cell;mitochondrion;	CYTOCHROME B-C1 COMPLEX SUBUNIT 1, MITOCHONDRIAL PRECURSOR.
RRBP1	IPI00215743 ; IPI00220967 ; IPI00744135 ; IPI00856098	human	Tumor only										33	16	0.268817	0.13	31	14	0.304006	0.05	No	109	33.587	No	cell;ribosome;endoplasmicreticulum; /// endoplasmicreticulum;	ISOFORM 3 OF RIBOSOME-BINDING PROTEIN 1.
SERPINE1	IPI00007118	human	Tumor only										2	2			4	3			Yes	21	35.3316	Yes	extracellularregion;plasmamembrane;"GO:0005576,EXP;GO:0005576,EXP;GO:0005886,EXP"	PLASMINOGEN ACTIVATOR INHIBITOR 1 PRECURSOR.
SNW1	IPI00013830	human	Tumor only										10	4			4	1			No	45	51.4526	No	nucleus;"GO:0005634,IDA"	SNW DOMAIN-CONTAINING PROTEIN 1.
SPAG9	IPI00748244	human	Tumor only										3	3							No	36	43.4196	No	cell;cytoplasm;cytoplasmicmembrane-boundedvesicle;	ISOFORM 7 OF C-JUN-AMINO-TERMINAL KINASE-INTERACTING PROTEIN 4.
WIPF2	IPI00435947 ; IPI00552647	human	Tumor only										6	3							No	28	83.5371	No	cytoskeleton;cytoplasm;	ISOFORM 1 OF WAS/WASL-INTERACTING PROTEIN FAMILY MEMBER 2.
MRPL34	IPI00028390	human	Tumor only										3	2							No	7	65.4218	No	mitochondrion;intracellular;ribosome;	39S RIBOSOMAL PROTEIN L34, MITOCHONDRIAL PRECURSOR.
PPID	IPI00003927	human	Tumor only										5	4	0.395929	0.01	1	1			No	31	28.4184	Yes	cytoplasm;	40 KDA PEPTIDYL-PROLYL CIS-TRANS ISOMERASE.
LOR	IPI00011673 ; IPI00384560	human	Tumor only										11	2	-0.0976108	0.32					No	4.5	66.4626	No	plasmamembrane;cytoplasm;cell;nucleus;cytoskeleton;"GO:0005856,IDA"	LORICRIN.
OGDH	IPI00098902	human	Tumor only										10	5			11	8			No	62	45.1662	No	mitochondrion;"GO:0005739,EXP"	2-OXOGLUTARATE DEHYDROGENASE E1 COMPONENT, MITOCHONDRIAL PRECURSOR.
	IPI00479509	human	Tumor only										25	4			27	4			not annotated	22	63.211	No		RCNSEP1 (FRAGMENT).
GSTO1	IPI00019755 ; IPI00642936	human	Tumor only										4	4			1	1			No	15.5	36.7995	No	cytoplasm;	GLUTATHIONE TRANSFERASE OMEGA-1.
HMGCL	IPI00293564 ; IPI00514742	human	Tumor only										9	4	0.0439433	0.01	3	2	0.321928	0	No	16.5	35.0221	Yes	mitochondrion;"GO:0005739,EXP"	HYDROXYMETHYLGLUTARYL-COA LYASE, MITOCHONDRIAL PRECURSOR.
TOM1L2	IPI00446294	human	Tumor only										3	3							No	27	58.1722	No	intracellular;	ISOFORM 1 OF TOM1-LIKE PROTEIN 2.
ALDH4A1	IPI00217871 ; IPI00647328	human	Tumor only										5	3			6	4			No	37	40.8927	No	mitochondrion;	DELTA-1-PYRROLINE-5-CARBOXYLATE DEHYDROGENASE, MITOCHONDRIAL PRECURSOR.
GBP1	IPI00028564	human	Tumor only										13	9	0.434403	0	5	4	0.785875	0	No	41	45.4169	No	plasmamembrane;	INTERFERON-INDUCED GUANYLATE-BINDING PROTEIN 1.
AFAP1L2	IPI00181905 ; IPI00382615 ; IPI00455138	human	Tumor only										5	4							No	36	51.3295	No	cytoplasm;"GO:0005737,IDA"	ISOFORM 1 OF ACTIN FILAMENT-ASSOCIATED PROTEIN 1-LIKE 2.
ST13	IPI00032826 ; IPI00793211 ; IPI00847961 ; IPI00892521 ; IPI00892883	human	Tumor only										10	3	0.136062	0.04	24	3	0.286304	0.1	No	14.75	43.6644	No	cytoplasm;	HSC70-INTERACTING PROTEIN.
TTLL3	IPI00386354	human	Tumor only														5	2			No	10	56.1436	No	cytoskeleton;	CDNA FLJ14048 FIS, CLONE HEMBA1006650, WEAKLY SIMILAR TO ARP2/3 COMPLEX 20 KD SUBUNIT.
CYP51A1	IPI00295772	human	Tumor only														3	2			not annotated	31	42.8479	No		CYTOCHROME P450, FAMILY 51.
MYH11	IPI00020501 ; IPI00024870 ; IPI00743857 ; IPI00744256 ; IPI00873792 ; IPI00873982	human	Tumor only										41	11	0.184425	0					No	159	48.6531	No	cytoplasm;proteincomplex;cytoplasmicmembrane-boundedvesicle;cytoskeleton; /// proteincomplex;cytoskeleton;	MYOSIN-11.
SH3GL1	IPI00019169	human	Tumor only										5	3	-0.214125	0	2	1			No	25	53.2508	No	cytoplasm;	ENDOPHILIN-A2.
MRPL9	IPI00307409 ; IPI00514545	human	Tumor only										5	4	0.434403	0					No	18.5	40.9476	No	mitochondrion;intracellular;ribosome;	39S RIBOSOMAL PROTEIN L9, MITOCHONDRIAL PRECURSOR.
TXLNA	IPI00470779	human	Tumor only										4	3			2	2			Yes	43	61.7127	No	extracellularregion;cytoplasm;"GO:0005737,IDA"	ALPHA-TAXILIN.
KPNB1	IPI00001639	human	Tumor only										63	18	-0.0840643	0.11	63	20	-0.0143553	0.05	No	41	43.275	No	cytoplasm;nucleoplasm;cytosol;proteincomplex;nucleus;nuclearenvelope;"GO:0005654,EXP;GO:0005654,EXP;GO:0005654,EXP;GO:0005829,EXP;GO:0005829,EXP;GO:0005829,EXP"	IMPORTIN SUBUNIT BETA-1.
PSMD5	IPI00002134	human	Tumor only										15	7			17	8	0.358454	0	No	34	38.1329	Yes	intracellular;cytoplasm;cytosol;nucleus;proteincomplex;"GO:0005634,IDA;GO:0005737,IDA"	26S PROTEASOME NON-ATPASE REGULATORY SUBUNIT 5.
TF	IPI00022463 ; IPI00798430	human	Tumor only										12	1	-0.333424	0.13	35	2	0.0144996	0.11	Yes	52	34.9129	Yes	extracellularregion;endosome;cytoplasmicmembrane-boundedvesicle;mitochondrion;"GO:0005739,IDA;GO:0016023,IDA;GO:0016023,IDA" /// extracellularregion;endosome;cytoplasmicmembrane-boundedvesicle;	SEROTRANSFERRIN PRECURSOR.
ZNF622	IPI00056499	human	Tumor only										2	2							No	36	46.5172	No	nucleus;intracellular;cytoplasm;	ZINC FINGER PROTEIN 622.
SNX12	IPI00438170 ; IPI00743822 ; IPI00844112	human	Tumor only										7	3	0.577767	0	1	1			not annotated	13.5	52.6901	No		ISOFORM 1 OF SORTING NEXIN-12.
RPL36	IPI00216237	human	Tumor only										7	3	0.599462	0	7	2	-0.31034	0	No	6	46.6229	No	nucleolus;cytosol;intracellular;ribosome;"GO:0005730,IDA;GO:0005829,EXP"	60S RIBOSOMAL PROTEIN L36.
OXCT1	IPI00026516	human	Tumor only										2	2			2	1			No	31	25.426	Yes	mitochondrion;"GO:0005739,IDA;GO:0005739,EXP"	SUCCINYL-COA:3-KETOACID-COENZYME A TRANSFERASE 1, MITOCHONDRIAL PRECURSOR.
A2ML1	IPI00550964	human	Tumor only														6	4			not annotated	52	42.7518	No		105 KDA PROTEIN.
;CSDE1	IPI00442103 ; IPI00470891 ; IPI00844264 ; IPI00873244	human	Tumor only														2	2			No	47.5	30.7551	Yes	mitochondrion;cytoplasm;	CDNA FLJ16692 FIS, CLONE TRACH3002561, MODERATELY SIMILAR TO UNR PROTEIN.
AHNAK2	IPI00856045 ; IPI00884904	human	Tumor only										197	71	-0.15056	0.08	67	31			No	405.5	41.4162	No	nucleus;cytoplasm;	ISOFORM 1 OF PROTEIN AHNAK2.
CSNK2A2	IPI00020602	human	Tumor only										1	1			5	3			not annotated	25	45.6343	No		CASEIN KINASE II SUBUNIT ALPHA'.
ACO2	IPI00017855 ; IPI00790739	human	Tumor only										33	16	0.120294	0.05	48	13	0.104697	0.1	No	48.5	34.7009	Yes	nucleus;mitochondrion;"GO:0005634,IDA;GO:0005739,EXP" /// nucleus;mitochondrion;"GO:0005634,IDA;GO:0005739,IDA"	ACONITATE HYDRATASE, MITOCHONDRIAL PRECURSOR.
MAP3K7IP1	IPI00019459 ; IPI00395625	human	Tumor only										3	3							No	26	43.5327	No	cytosol;"GO:0005829,EXP;GO:0005829,EXP;GO:0005829,EXP;GO:0005829,EXP"	MITOGEN-ACTIVATED PROTEIN KINASE KINASE KINASE 7-INTERACTING PROTEIN 1.
SEC63	IPI00218922 ; IPI00852625	human	Tumor only										8	5			2	2			No	28	23.7491	Yes	cell;endoplasmicreticulum;	TRANSLOCATION PROTEIN SEC63 HOMOLOG.
	IPI00401819	human	Tumor only														4	2			No	8	47.1139	No	intracellular;ribosome;	PUTATIVE UNCHARACTERIZED PROTEIN RPS26.
FN1	IPI00556632	human	Tumor only										110	22	0	0.1	134	32	-0.176323	0.11	Yes	93	40.365	No	proteinaceousextracellularmatrix;plasmamembrane;extracellularregion;cytoplasm;cytoplasmicmembrane-boundedvesicle;"GO:0005576,EXP;GO:0005737,IDA;GO:0016023,EXP"	ISOFORM 12 OF FIBRONECTIN PRECURSOR.
SUGT1	IPI00791573 ; IPI00828150	human	Tumor only										4	3			2	1			No	24	36.1072	Yes	proteincomplex;chromosome;intracellular;	ISOFORM 2 OF SUPPRESSOR OF G2 ALLELE OF SKP1 HOMOLOG.
BAT1	IPI00893580	human	Tumor only														18	7	0.304006	0.03	not annotated	26	46.4	No		HLA-B ASSOCIATED TRANSCRIPT 1.
	IPI00791157	human	Tumor only										7	4	-0.62293	0	23	5	0.0439433	0.05	not annotated	10	54.0596	No		16 KDA PROTEIN.
SLC25A13	IPI00007084 ; IPI00873334	human	Tumor only										8	3			12	6	0.358454	0	No	42	34.851	Yes	cell;plasmamembrane;mitochondrion;"GO:0005739,IDA;GO:0005739,IDA"	MITOCHONDRIAL ASPARTATE-GLUTAMATE CARRIER PROTEIN.
SPATA5	IPI00329583 ; IPI00890727	human	Tumor only										2	2			1	1			No	53	39.0186	Yes	mitochondrion;cytoplasm;	ISOFORM 1 OF SPERMATOGENESIS-ASSOCIATED PROTEIN 5.
BBS1;DPP3	IPI00020672 ; IPI00645171	human	Tumor only										12	7			11	3			No	35	40.8022	No	cytoplasm;	ISOFORM 1 OF DIPEPTIDYL-PEPTIDASE 3.
ADK	IPI00234368 ; IPI00290279	human	Tumor only										7	5	-1.09085	0	2	2			not annotated	24.5	37.3185	Yes		ISOFORM SHORT OF ADENOSINE KINASE.
2010-09-02	IPI00893645	human	Tumor only														5	2	-0.632268	0	not annotated	14	47.2169	No		21 KDA PROTEIN.
C1orf116	IPI00028392 ; IPI00845438	human	Tumor only										36	8	0.304006	0	19	9	0.577767	0	No	36	60.1879	No	cytoplasm;	ISOFORM 1 OF SPECIFICALLY ANDROGEN-REGULATED GENE PROTEIN.
	IPI00745789	human	Tumor only										10	4			13	5			No	16	35.2735	Yes	intracellular;ribosome;	SIMILAR TO 40S RIBOSOMAL PROTEIN SA (P40) (34/67 KDA LAMININ RECEPTOR) (COLON CARCINOMA LAMININ-BINDING PROTEIN) (NEM/1CHD4) (MULTIDRUG RESISTANCE-ASSOCIATED PROTEIN MGR1-AG) ISOFORM 1.
CD59	IPI00011302	human	Tumor only										21	3	0.577767	0.14	20	2	0.473931	0.06	Yes	6	28.4	Yes	extracellularregion;plasmamembrane;cell;	CD59 GLYCOPROTEIN PRECURSOR.
BPNT1	IPI00410214 ; IPI00410215 ; IPI00784360	human	Tumor only										1	1	0.556393	0	4	3	0.415037	0	No	24	36.7609	Yes	cytosol;"GO:0005829,EXP"	ISOFORM 1 OF 3'(2'),5'-BISPHOSPHATE NUCLEOTIDASE 1.
	IPI00889080	human	Tumor only										9	4	0.395929	0					not annotated	17	41.2727	No		SIMILAR TO HCG1997137 ISOFORM 1.
HSPD1	IPI00784154	human	Tumor only										205	23	-0.378512	0.06	353	25	-0.189034	0.04	Yes	40	30.1939	Yes	extracellularspace;cell;plasmamembrane;proteincomplex;nucleus;cytosol;mitochondrion;endosome;cytoplasmicmembrane-boundedvesicle;"GO:0005615,IDA;GO:0005739,IDA;GO:0005768,IDA;GO:0005829,IDA;GO:0005886,IDA;GO:0005623,IDA;GO:0005634,IDA;GO:0043234,IDA;GO:001	60 KDA HEAT SHOCK PROTEIN, MITOCHONDRIAL PRECURSOR.
ATP6V0D1	IPI00034159	human	Tumor only										1	1	0.395929	0	3	2	-0.111031	0	No	20	38.0148	Yes	cell;proteincomplex;vacuole;	VACUOLAR PROTON PUMP SUBUNIT D 1.
MYO1B	IPI00376344 ; IPI00414980 ; IPI00795618	human	Tumor only										11	3	-0.176323	0.02	34	10	0.251539	0.11	No	81	38.5525	Yes	proteincomplex;cytoskeleton;	ISOFORM 1 OF MYOSIN-IB.
MCTS1	IPI00179026 ; IPI00604785 ; IPI00645446	human	Tumor only										7	4	0.168123	0	7	4	-0.124328	0	No	10.5	54.6	No	cytoplasm;	MALIGNANT T CELL AMPLIFIED SEQUENCE 1.
SLC25A24	IPI00337494 ; IPI00412742	human	Tumor only										9	4			8	6	0.304006	0	No	30	27.1515	Yes	cell;mitochondrion;	ISOFORM 1 OF CALCIUM-BINDING MITOCHONDRIAL CARRIER PROTEIN SCAMC-1.
ALDH1A1	IPI00218914	human	Tumor only										4	4	0.454032	0					No	28	29.599	Yes	cytosol;nucleus;cytoplasm;"GO:0005634,IDA;GO:0005829,EXP"	RETINAL DEHYDROGENASE 1.
PRDX3	IPI00024919 ; IPI00374151	human	Tumor only										11	5	-0.298658	0	10	4	0.340075	0.01	No	14.5	26.6882	Yes	cytoplasm;proteincomplex;cytosol;mitochondrion;"GO:0005737,IDA;GO:0005739,IDA;GO:0005829,IPI;GO:0043234,IPI" /// mitochondrion;	THIOREDOXIN-DEPENDENT PEROXIDE REDUCTASE, MITOCHONDRIAL PRECURSOR.
NDUFS4	IPI00011217	human	Tumor only										8	3			9	2			No	14	50.2663	No	cell;proteincomplex;mitochondrion;"GO:0043234,IMP;GO:0005739,IMP;GO:0043234,IMP;GO:0005739,IMP"	NADH DEHYDROGENASE [UBIQUINONE] IRON-SULFUR PROTEIN 4, MITOCHONDRIAL PRECURSOR.
MCM3	IPI00013214 ; IPI00385434	human	Tumor only										9	5			4	4			No	42	50.8668	No	cytoplasm;nucleoplasm;proteincomplex;nuclearchromosome;nucleus;"GO:0005654,EXP;GO:0005654,EXP;GO:0005654,EXP;GO:0005654,EXP;GO:0005654,EXP;GO:0005654,EXP;GO:0005654,EXP;GO:0005737,IDA" /// nucleus;"GO:0005634,IDA"	DNA REPLICATION LICENSING FACTOR MCM3.
BANF1	IPI00026087 ; IPI00186338	human	Tumor only										16	2			37	3			No	6.5	20.6337	Yes	cytoplasm;cytosol;nucleus;chromosome;"GO:0005829,EXP;GO:0005829,EXP"	BARRIER-TO-AUTOINTEGRATION FACTOR.
DCTN2	IPI00220503 ; IPI00789792	human	Tumor only										13	10	-0.0426443	0	17	9	0.251539	0	No	26.5	31.8542	Yes	cell;proteincomplex;cytoskeleton;chromosome;microtubuleorganizingcenter;cytoplasm;"GO:0005694,IDA;GO:0043234,IDA;GO:0005815,IDA;GO:0005856,IDA;GO:0043234,IDA" /// cell;proteincomplex;cytoskeleton;	DYNACTIN 2.
PPP2R5C	IPI00012834 ; IPI00185637 ; IPI00220145 ; IPI00442098 ; IPI00845251	human	Tumor only														8	7	0.217591	0.05	No	32.25	43.0931	No	intracellular;nucleus;proteincomplex;"GO:0005634,IDA" /// nucleus;proteincomplex;intracellular;"GO:0005634,IDA" /// proteincomplex;intracellular; /// cell;proteincomplex;intracellular;"GO:0005623,IDA"	ISOFORM GAMMA-3 OF SERINE/THREONINE-PROTEIN PHOSPHATASE 2A 56 KDA REGULATORY SUBUNIT GAMMA ISOFORM.
DNAJA1	IPI00012535	human	Tumor only										10	6	0.251539	0.03	10	5	-0.918386	0.08	No	29	31.566	Yes	cell;cytoplasm;cytoskeleton;"GO:0005737,IDA;GO:0005856,IDA"	DNAJ HOMOLOG SUBFAMILY A MEMBER 1.
LAMP2	IPI00009030 ; IPI00216172 ; IPI00739827 ; IPI00894494	human	Tumor only										10	2							No	19	25.0785	Yes	endosome;plasmamembrane;lysosome;cell;cytoplasmicmembrane-boundedvesicle;"GO:0005623,IDA;GO:0005764,IDA;GO:0005768,IDA;GO:0005886,EXP;GO:0016023,EXP;GO:0016023,IDA" /// cell;endosome;lysosome; /// plasmamembrane;cell;endosome;lysosome;cytoplasmicmembrane-	ISOFORM LAMP-2A OF LYSOSOME-ASSOCIATED MEMBRANE GLYCOPROTEIN 2 PRECURSOR.
FARSB	IPI00300074	human	Tumor only										3	3			7	3			No	47	43.5896	No	cell;cytoplasm;	PHENYLALANYL-TRNA SYNTHETASE BETA CHAIN.
BCKDHA	IPI00025100 ; IPI00444329 ; IPI00470386	human	Tumor only										4	2			1	1			No	25.6667	35.4052	No	proteincomplex;mitochondrion;"GO:0043234,IDA;GO:0005739,IDA" /// mitochondrion;	2-OXOISOVALERATE DEHYDROGENASE SUBUNIT ALPHA, MITOCHONDRIAL PRECURSOR.
CYFIP1	IPI00644231	human	Tumor only										9	5			13	10	0.104697	0.02	No	81	47.1271	No	plasmamembrane;cell;cellular_component;cytoplasm;	ISOFORM 1 OF CYTOPLASMIC FMR1-INTERACTING PROTEIN 1.
ACOT9	IPI00220710 ; IPI00646015 ; IPI00748985	human	Tumor only										1	1	-0.111031	0	5	3			No	32	53.954	No	mitochondrion;	ACYL-COENZYME A THIOESTERASE 2, MITOCHONDRIAL ISOFORM B.
MMP14	IPI00218398	human	Tumor only										5	3			1	1			Yes	34	47.7497	No	proteinaceousextracellularmatrix;cell;plasmamembrane;cytoplasmicmembrane-boundedvesicle;	MATRIX METALLOPROTEINASE-14 PRECURSOR.
MTDH	IPI00328715	human	Tumor only										16	6			15	6			No	32	50.0586	No	cell;plasmamembrane;nucleolus;nucleus;nuclearenvelope;endoplasmicreticulum;"GO:0005730,IDA"	PROTEIN LYRIC.
LUM	IPI00020986 ; IPI00794403 ; IPI00796888	human	Tumor only										2	2							Yes	14.3333	40.4421	No	extracellularregion;proteinaceousextracellularmatrix;"GO:0005578,IDA"	LUMICAN PRECURSOR.
UBQLN4	IPI00024502 ; IPI00878595	human	Tumor only										5	3			7	6			No	15.5	58.18	No	cytoplasm;cytosol;endoplasmicreticulum;nucleus;"GO:0005634,IDA;GO:0005737,IDA"	UBIQUILIN-4.
TPP2	IPI00020416 ; IPI00640197	human	Tumor only										3	2							No	76.5	37.0782	Yes	cytoplasm;	TRIPEPTIDYL-PEPTIDASE 2.
RBP1	IPI00219718	human	Tumor only										21	7	0.454032	0.07	21	7	0.943416	0.09	No	15	41.5518	No	cytoplasm;	RETINOL-BINDING PROTEIN I, CELLULAR.
IMPA2	IPI00023635 ; IPI00448781 ; IPI00555726	human	Tumor only										1	1			2	2			not annotated	15	32.8674	No		ISOFORM 1 OF INOSITOL MONOPHOSPHATASE 2.
TPR	IPI00742682	human	Tumor only										36	29			8	3			No	179	57.2107	No	cell;nucleoplasm;proteincomplex;nucleus;nuclearenvelope;cytoplasm;"GO:0005654,EXP"	NUCLEAR PORE COMPLEX-ASSOCIATED PROTEIN TPR.
MAP4	IPI00411375	human	Tumor only										28	11							No	64	52.3557	No	proteincomplex;cytoskeleton;	ISOFORM 4 OF MICROTUBULE-ASSOCIATED PROTEIN 4.
SLK	IPI00022827 ; IPI00247439	human	Tumor only										4	4			4	3			No	88.5	57.5764	No	cytoplasm;	ISOFORM 1 OF STE20-LIKE SERINE/THREONINE-PROTEIN KINASE.
NEDD4	IPI00009322	human	Tumor only										4	2							No	62	58.0804	No	intracellular;cytoplasm;cytosol;proteincomplex;	E3 UBIQUITIN-PROTEIN LIGASE NEDD4.
COL1A1	IPI00297646	human	Tumor only										20	7	1.8365	0.04	20	6	0.473931	0.02	Yes	83	30.617	Yes	proteinaceousextracellularmatrix;plasmamembrane;extracellularregion;"GO:0005576,EXP;GO:0005576,EXP;GO:0005576,EXP;GO:0005576,EXP;GO:0005576,EXP;GO:0005886,EXP;GO:0005886,EXP;GO:0005886,EXP;GO:0005886,EXP;GO:0005886,EXP;GO:0005886,EXP"	COLLAGEN ALPHA-1(I) CHAIN PRECURSOR.
CHCHD6	IPI00031622 ; IPI00789915 ; IPI00796105	human	Tumor only										5	3	0.473931	0.07	1	1	0.304006	0	not annotated	15.3333	48.2853	No		COILED-COIL-HELIX-COILED-COIL-HELIX DOMAIN-CONTAINING PROTEIN 6.
PPP2R1B	IPI00294178 ; IPI00335449 ; IPI00874039	human	Tumor only										22	5	0.0740006	0.06					not annotated	43.5	38.2084	Yes		SERINE/THREONINE-PROTEIN PHOSPHATASE 2A 65 KDA REGULATORY SUBUNIT A BETA ISOFORM.
	IPI00011916 ; IPI00893242 ; IPI00893993	human	Tumor only										2	1			7	2	0.234465	0	not annotated	17.3333	36.5281	No		MULTISYNTHETASE COMPLEX AUXILIARY COMPONENT P38.
EXOC1	IPI00019427 ; IPI00215762	human	Tumor only										2	1			4	4	0.304006	0	No	58	44.3232	No	cytoplasm;proteincomplex; /// proteincomplex;cytoplasm;	ISOFORM 1 OF EXOCYST COMPLEX COMPONENT 1.
	IPI00176692	human	Tumor only										24	3			57	5			not annotated	22	56.5238	No		32 KDA PROTEIN.
ALDH9A1	IPI00479877 ; IPI00873817	human	Tumor only										3	3	0.321928	0.02	3	3			No	32.5	32.0745	Yes	cytosol;nucleus;cytoskeleton;cytoplasm;"GO:0005634,IDA;GO:0005856,IDA"	ALDEHYDE DEHYDROGENASE 9A1.
TCEA1	IPI00218106 ; IPI00333215	human	Tumor only										2	2			1	1			No	22.5	43.6546	No	nucleoplasm;nucleus;"GO:0005654,EXP;GO:0005654,EXP"	ISOFORM 2 OF TRANSCRIPTION ELONGATION FACTOR A PROTEIN 1.
NEBL	IPI00418240	human	Tumor only										5	3							not annotated	19	50.6671	No		LIM-NEBULETTE.
C9orf23	IPI00166873	human	Tumor only										2	2							not annotated	10	76.716	No		ALBA-LIKE PROTEIN C9ORF23.
UQCRFS1	IPI00026964 ; IPI00883602 ; IPI00886920 ; IPI00889196	human	Tumor only										8	3			3	2			No	17	45.5728	No	cell;proteincomplex;mitochondrion; /// cell;mitochondrion; /// cell;	CYTOCHROME B-C1 COMPLEX SUBUNIT RIESKE, MITOCHONDRIAL PRECURSOR.
MEMO1	IPI00032426 ; IPI00514619 ; IPI00878843 ; IPI00893200 ; IPI00893861	human	Tumor only										12	7	0.340075	0.06	2	2			No	14.8	54.9178	No	nucleus;cytoplasm;"GO:0005634,IDA;GO:0005737,IDA"	PROTEIN MEMO1.
GSK3B	IPI00028570 ; IPI00216190	human	Tumor only														2	2	-2.848	0	No	29.5	29.1917	Yes	proteincomplex;cytosol;nucleus;cytoplasm;"GO:0005634,IDA;GO:0005737,IDA;GO:0005829,EXP;GO:0005829,EXP;GO:0005829,EXP;GO:0005829,EXP;GO:0005829,EXP;GO:0005829,EXP;GO:0005737,IDA;GO:0043234,IDA;GO:0005737,IDA;GO:0043234,IDA"	ISOFORM 1 OF GLYCOGEN SYNTHASE KINASE-3 BETA.
NRM	IPI00217557 ; IPI00645046 ; IPI00791698 ; IPI00855976	human	Tumor only										2	2			1	1			No	13	40.8382	No	cell;nucleus;nuclearenvelope;"GO:0005635,IDA"	ISOFORM 1 OF NURIM.
EIF3B	IPI00396370 ; IPI00719752 ; IPI00893301	human	Tumor only										24	10	0.0740006	0	19	5			No	37.6667	45.8343	No	proteincomplex;cytosol;cytoplasm;"GO:0005829,EXP"	ISOFORM 1 OF EUKARYOTIC TRANSLATION INITIATION FACTOR 3 SUBUNIT B.
NDRG1	IPI00022078 ; IPI00183085	human	Tumor only										181	13	-0.704872	0.15	193	11	0.304006	0.08	No	16	49.2985	No	plasmamembrane;cytoplasm;nucleus;cytoskeleton;"GO:0005856,IDA"	PROTEIN NDRG1.
MRPL14	IPI00418290	human	Tumor only										4	4			2	1			No	11	23.2862	Yes	mitochondrion;intracellular;ribosome;	39S RIBOSOMAL PROTEIN L14, MITOCHONDRIAL PRECURSOR.
ITGA5	IPI00306604	human	Tumor only										1	1	-1.09761	0	4	3	-0.201634	0	No	42	46.8063	No	plasmamembrane;cell;proteincomplex;nucleus;cytoplasm;Golgiapparatus;"GO:0005634,IDA;GO:0005737,IDA;GO:0005794,IDA"	INTEGRIN ALPHA-5 PRECURSOR.
GRSF1	IPI00383460 ; IPI00444704 ; IPI00478657	human	Tumor only										4	4	-0.31034	0	3	2			No	32.3333	55.5156	No	cytoplasm;	G-RICH RNA SEQUENCE BINDING FACTOR 1 ISOFORM 1.
STXBP2	IPI00019971 ; IPI00642310	human	Tumor only										2	2							No	45.5	45.143	No	cellular_component;	SYNTAXIN-BINDING PROTEIN 2.
LYPLA1	IPI00007321 ; IPI00398727 ; IPI00797535	human	Tumor only										12	5	0.200913	0.02	12	3	0.340075	0.02	No	12	43.0793	No	cytoplasm;	ISOFORM 1 OF ACYL-PROTEIN THIOESTERASE 1.
	IPI00029091	human	Tumor only										50	5	0.535332	0.06	60	4			not annotated	12	32.5226	Yes		PUTATIVE NUCLEOSIDE DIPHOSPHATE KINASE.
MAX	IPI00018214 ; IPI00219929	human	Tumor only										4	2							No	10.5	79.2709	No	nucleus;	ISOFORM 1 OF PROTEIN MAX.
CPA4	IPI00008894	human	Tumor only										2	2			3	3	0.785875	0	Yes	23	34.324	Yes	extracellularregion;	CARBOXYPEPTIDASE A4 PRECURSOR.
P4HA2	IPI00003128 ; IPI00182373	human	Tumor only										8	7			9	5			No	38.5	40.8413	No	intracellular;organelle;endoplasmicreticulum;	ISOFORM IIB OF PROLYL 4-HYDROXYLASE SUBUNIT ALPHA-2 PRECURSOR.
SPRR2E	IPI00386597	human	Tumor only														16	4	0.666576	0.04	No	6	112.157	No	cytoskeleton;cytoplasm;"GO:0005737,IDA"	SMALL PROLINE-RICH PROTEIN 2E.
DDT	IPI00293867 ; IPI00878984	human	Tumor only										9	2			10	3	0.340075	0.01	No	7	35.6305	Yes	cytoplasm;	D-DOPACHROME DECARBOXYLASE.
MMS19	IPI00154451 ; IPI00178649 ; IPI00640677 ; IPI00647775	human	Tumor only										2	2			4	2			No	43	34.0669	No	nucleoplasm;proteincomplex;nucleus;	ISOFORM 1 OF MMS19 NUCLEOTIDE EXCISION REPAIR PROTEIN HOMOLOG.
PTN	IPI00412264 ; IPI00873594	human	Tumor only										4	2	2.18442	0.02					Yes	12	22.9887	Yes	extracellularspace;extracellularregion;endoplasmicreticulum;"GO:0005783,IDA"	PLEIOTROPHIN PRECURSOR.
UBAP2	IPI00053288 ; IPI00171127	human	Tumor only										8	6							not annotated	26	52.4451	No		60 KDA PROTEIN.
PCMT1	IPI00411680 ; IPI00828189	human	Tumor only										16	6	-0.0143553	0.02	15	5			No	13	48.0689	No	cellular_component;cytoplasm;endoplasmicreticulum;"GO:0005737,IDA"	ISOFORM 1 OF PROTEIN-L-ISOASPARTATE(D-ASPARTATE) O-METHYLTRANSFERASE.
ARD1A	IPI00013184 ; IPI00440719 ; IPI00641919 ; IPI00791664 ; IPI00793465	human	Tumor only										3	3			4	3			No	12.5	48.1059	No	intracellular;cytoplasm;nucleus;"GO:0005622,IDA;GO:0005634,IDA;GO:0005737,IDA"	N-TERMINAL ACETYLTRANSFERASE COMPLEX ARD1 SUBUNIT HOMOLOG A.
PDK3	IPI00014849	human	Tumor only														2	2			No	28	46.4643	No	mitochondrion;	[PYRUVATE DEHYDROGENASE [LIPOAMIDE]] KINASE ISOZYME 3, MITOCHONDRIAL PRECURSOR.
UBA5	IPI00015736 ; IPI00383579 ; IPI00791004	human	Tumor only										6	2			4	3			No	13.3333	44.1066	No	cytoplasm;"GO:0005737,IDA"	UBIQUITIN-LIKE MODIFIER-ACTIVATING ENZYME 5.
FH	IPI00296053 ; IPI00759715	human	Tumor only										25	12	-0.201634	0	27	10			No	34	25.4259	Yes	proteincomplex;mitochondrion;cytoplasm;"GO:0005739,EXP"	ISOFORM MITOCHONDRIAL OF FUMARATE HYDRATASE, MITOCHONDRIAL PRECURSOR.
NT5C3	IPI00100192 ; IPI00619911 ; IPI00647805 ; IPI00807412	human	Tumor only										3	2							No	24.3333	37.4393	Yes	cytoplasm;endoplasmicreticulum;"GO:0005737,IDA;GO:0005783,IDA"	ISOFORM 3 OF CYTOSOLIC 5'-NUCLEOTIDASE 3.
H2AFV	IPI00398798	human	Tumor only										25	3			21	3			No	7	31.9608	Yes	nucleus;chromosome;	H2A HISTONE FAMILY, MEMBER V ISOFORM 3.
ATP2B4	IPI00012490 ; IPI00217164 ; IPI00217165 ; IPI00217166 ; IPI00217168 ; IPI00217169 ; IPI00217170 ; IPI00217171 ; IPI00856079	human	Tumor only										15	6	0.494109	0.03	14	8	0.152003	0.07	No	72.5	41.3382	No	plasmamembrane; /// cell;	ISOFORM XD OF PLASMA MEMBRANE CALCIUM-TRANSPORTING ATPASE 4.
DSG3	IPI00031547	human	Tumor only										128	19	0.304006	0.16	149	19	0.713119	0.07	No	55	33.9017	Yes	cell;plasmamembrane;cytosol;"GO:0005829,EXP;GO:0005886,EXP"	DESMOGLEIN-3 PRECURSOR.
GNAI3	IPI00220578	human	Tumor only										17	4	0.514573	0	5	3	-0.0976108	0	No	22	42.6508	No	cytoplasm;Golgiapparatus;	GUANINE NUCLEOTIDE-BINDING PROTEIN G.
DAK	IPI00551024	human	Tumor only										14	10	0.395929	0	8	5	0.577767	0.05	not annotated	32	33.6889	Yes		DIHYDROXYACETONE KINASE.
SPRR2A	IPI00017993	human	Tumor only										5	3	1.68966	0.05					No	6	113.663	No	cytoplasm;cytoskeleton;"GO:0005737,IDA"	SMALL PROLINE-RICH PROTEIN 2A.
CAP1	IPI00008274 ; IPI00514858 ; IPI00643567 ; IPI00645789	human	Tumor only										63	10	-0.0285692	0.01	130	13	-0.0143553	0.05	No	15.75	37.6206	No	plasmamembrane;cytoplasm;cytoskeleton; /// cytoskeleton;cytoplasm;	ADENYLYL CYCLASE-ASSOCIATED PROTEIN 1.
PML	IPI00022348 ; IPI00303999 ; IPI00304000 ; IPI00332110 ; IPI00337754 ; IPI00382504 ; IPI00395707 ; IPI00395893 ; IPI00744329 ; IPI00876842	human	Tumor only										7	5			4	1			No	42.3333	58.2785	No	intracellular;cytoplasm;nucleolus;nucleoplasm;cell;nucleus;nuclearenvelope;"GO:0005623,IDA;GO:0005634,IDA;GO:0005634,IDA;GO:0005634,IDA;GO:0005654,IDA;GO:0005730,IDA;GO:0005730,IDA;GO:0005737,IDA;GO:0005737,IDA;GO:0005737,IDA;GO:0005737,IDA;GO:0005737,IDA	ISOFORM PML-1 OF PROBABLE TRANSCRIPTION FACTOR PML.
FAM114A1	IPI00031670	human	Tumor only										5	4	0.0291463	0	7	6			No	27	50.3068	No	cytoplasm;	PROTEIN NOXP20.
HSPA5	IPI00003362	human	Tumor only										236	25			227	21			No	43	32.1247	Yes	intracellular;organelle;cell;cytoplasm;proteincomplex;cytosol;endoplasmicreticulum;nucleus;cytoplasmicmembrane-boundedvesicle;"GO:0005634,IDA;GO:0005737,IDA;GO:0005829,IDA;GO:0043234,IDA;GO:0005623,IDA;GO:0005783,IDA;GO:0005737,IDA"	HSPA5 PROTEIN.
CUL4B	IPI00179057 ; IPI00480142 ; IPI00643885 ; IPI00644450	human	Tumor only										2	2			3	2			No	54	41.6141	No	proteincomplex;intracellular;cellular_component; /// proteincomplex;intracellular;	ISOFORM 1 OF CULLIN-4B.
LIMA1	IPI00008918 ; IPI00220466 ; IPI00883896	human	Tumor only										39	12	0.321928	0.06	40	13	0.200913	0.05	No	55.3333	61.24	No	plasmamembrane;cytoplasm;cytoskeleton;"GO:0005856,IDA;GO:0005886,IDA;GO:0005856,IDA" /// plasmamembrane;cytoskeleton;cytoplasm;"GO:0005856,IDA;GO:0005886,IDA;GO:0005856,IDA"	ISOFORM BETA OF LIM DOMAIN AND ACTIN-BINDING PROTEIN 1.
NDUFB10	IPI00074489 ; IPI00479905	human	Tumor only										4	3			5	3			No	15.5	59.382	No	mitochondrion; /// cell;proteincomplex;mitochondrion;	NDUFB10 PROTEIN.
KTN1	IPI00328753 ; IPI00337736 ; IPI00783726	human	Tumor only										42	20	1	0.05	25	16	1.35845	0	No	108.333	49.6648	No	plasmamembrane;cell;endoplasmicreticulum; /// endoplasmicreticulum;"GO:0005783,IDA"	ISOFORM 1 OF KINECTIN.
HNRNPUL2	IPI00456887	human	Tumor only										32	10	0.514573	0.07	9	5	0.152003	0	No	50	56.3831	No	nucleus;	HETEROGENEOUS NUCLEAR RIBONUCLEOPROTEIN U-LIKE PROTEIN 2.
PTGES2	IPI00303568 ; IPI00514138	human	Tumor only										8	7			3	2			No	23.5	46.2095	No	cell;cytosol;nucleus;mitochondrion;cytoplasm;Golgiapparatus;"GO:0005739,IDA"	PROSTAGLANDIN E SYNTHASE 2.
LYNX1	IPI00218851 ; IPI00219827	human	Tumor only										5	2	0.915936	0.02	4	2	0.217591	0	Yes	4	42.5344	No	extracellularregion;	LY-6 NEUROTOXIN-LIKE PROTEIN 1 ISOFORM A.
LRBA	IPI00002255	human	Tumor only										3	2							No	176	45.1352	No	cellular_component;cytoplasmicmembrane-boundedvesicle;	LIPOPOLYSACCHARIDE-RESPONSIVE AND BEIGE-LIKE ANCHOR PROTEIN.
EEF1D	IPI00023048 ; IPI00642971	human	Tumor only										24	10	0	0.11	28	7	0.0588937	0	No	32.5	45.7153	No	cytoplasm;proteincomplex;cytosol;"GO:0005829,EXP" /// proteincomplex;cytoplasm;	ELONGATION FACTOR 1-DELTA.
GALNS	IPI00029605 ; IPI00645888	human	Tumor only										2	2			1	1			No	17.5	27.9005	Yes	lysosome;	N-ACETYLGALACTOSAMINE-6-SULFATASE PRECURSOR.
EIF2A	IPI00012462	human	Tumor only										2	2	0.104697	0	3	3			No	41	40.8218	No	cytoplasm;proteincomplex;"GO:0005737,IDA;GO:0005737,IDA;GO:0043234,IDA"	EUKARYOTIC TRANSLATION INITIATION FACTOR 2A.
PPL	IPI00298057	human	Tumor only										60	28	1.02915	0.06	37	15	1.39593	0.17	No	155	59.7416	No	plasmamembrane;nucleus;mitochondrion;cytoskeleton;cytoplasm;	PERIPLAKIN.
FAM134C	IPI00254338	human	Tumor only										2	2			2	2			No	22	53.2431	No	cell;	PROTEIN FAM134C.
HCLS1	IPI00026156	human	Tumor only										3	1			4	2			No	29	56.508	No	cell;cytoplasm;nucleoplasm;proteincomplex;nucleus;mitochondrion;	HEMATOPOIETIC LINEAGE CELL-SPECIFIC PROTEIN.
ARHGAP17	IPI00064767 ; IPI00386947 ; IPI00829657 ; IPI00829687 ; IPI00830043	human	Tumor only										4	4	0.358454	0	2	2	0.494109	0	No	34.8	44.4451	No	cell;plasmamembrane;intracellular;cytoplasm;	ISOFORM 1 OF RHO GTPASE-ACTIVATING PROTEIN 17.
ARHGDIA	IPI00791180	human	Tumor only										17	4			22	2			not annotated	7	14.5468	Yes		9 KDA PROTEIN.
TMED5	IPI00294472	human	Tumor only														2	2	-0.0565835	0	No	12	49.7341	No	cell;cytoplasm;endoplasmicreticulum;"GO:0005737,IDA"	TRANSMEMBRANE EMP24 DOMAIN-CONTAINING PROTEIN 5 PRECURSOR.
CNPY2	IPI00443909	human	Tumor only										5	3	0.0588937	0	14	4	0.0892673	0.03	No	12	47.2451	No	plasmamembrane;endoplasmicreticulum;	ISOFORM 1 OF PROTEIN CANOPY HOMOLOG 2 PRECURSOR.
PIN4	IPI00006658	human	Tumor only										21	3							No	12	36.2109	Yes	mitochondrion;	PROTEIN (PEPTIDYL-PROLYL CIS/TRANS ISOMERASE) NIMA-INTERACTING, 4.
RAB14	IPI00291928 ; IPI00646415	human	Tumor only										12	4			16	6	0.136062	0	No	14.5	32.0464	Yes	plasmamembrane;cell;cytosol;intracellular;endosome;cytoplasm;lysosome;endoplasmicreticulum;cytoplasmicmembrane-boundedvesicle;Golgiapparatus;"GO:0005622,IDA"	RAS-RELATED PROTEIN RAB-14.
SLC16A1	IPI00024650	human	Tumor only														11	3			No	15	36.686	Yes	plasmamembrane;cell;	MONOCARBOXYLATE TRANSPORTER 1.
PGK1	IPI00169383	human	Tumor only										294	17	-0.344828	0.1	259	18	0.251539	0.04	No	36	27.2616	Yes	cytoplasm;	PHOSPHOGLYCERATE KINASE 1.
PDS5A	IPI00303063 ; IPI00854642	human	Tumor only														4	3			No	101	48.0947	No	nucleus;	ISOFORM 2 OF SISTER CHROMATID COHESION PROTEIN PDS5 HOMOLOG A.
SART3	IPI00006025	human	Tumor only										2	2			5	5	0.577767	0	No	67	45.4563	No	intracellular;nucleoplasm;cytoplasm;nucleus;	ISOFORM 1 OF SQUAMOUS CELL CARCINOMA ANTIGEN RECOGNIZED BY T-CELLS 3.
POLR2E	IPI00291093	human	Tumor only										3	2			9	3			No	17	44.5024	No	nucleoplasm;proteincomplex;nucleus;"GO:0005654,EXP;GO:0005654,EXP;GO:0005654,EXP;GO:0005654,EXP;GO:0005654,EXP;GO:0005654,EXP;GO:0005654,EXP"	DNA-DIRECTED RNA POLYMERASES I, II, AND III SUBUNIT RPABC1.
GRIPAP1	IPI00414215 ; IPI00873340	human	Tumor only										4	4							No	47	60.3546	No	cellular_component;endosome;	ISOFORM 2 OF GRIP1-ASSOCIATED PROTEIN 1.
ARF4	IPI00215918 ; IPI00792330	human	Tumor only										16	4							No	11.5	29.228	Yes	plasmamembrane;intracellular;cytoplasm;Golgiapparatus;	ADP-RIBOSYLATION FACTOR 4.
SLPI	IPI00008580	human	Tumor only										3	3	0.599462	0.03	2	2	0.454032	0.05	Yes	9	40.4015	No	extracellularregion;	ANTILEUKOPROTEINASE PRECURSOR.
APEH	IPI00337741	human	Tumor only										11	2			3	1			No	37	43.2004	No	cytoplasm;	ACYLAMINO-ACID-RELEASING ENZYME.
UQCRB	IPI00220416 ; IPI00643836 ; IPI00790644 ; IPI00798386	human	Tumor only										6	1			7	4			No	10.5	35.2296	Yes	cell;mitochondrion;	CYTOCHROME B-C1 COMPLEX SUBUNIT 7.
NDRG2	IPI00008994 ; IPI00218108 ; IPI00218109 ; IPI00382995 ; IPI00384121 ; IPI00759789	human	Tumor only										3	2			6	2	0.200913	0.08	No	15	49.9469	No	microtubuleorganizingcenter;cytoplasm;cytosol;nucleus;"GO:0005634,IDA;GO:0005634,IDA;GO:0005634,IDA;GO:0005634,IDA;GO:0005737,IDA;GO:0005737,IDA;GO:0005737,IDA;GO:0005815,IDA;GO:0005815,IDA;GO:0005815,IDA;GO:0005815,IDA" /// cytosol;nucleus;microtubuleorg	ISOFORM 1 OF PROTEIN NDRG2.
MAN1B1	IPI00008207	human	Tumor only										3	2			2	2			No	42	53.1002	No	cell;endoplasmicreticulum;	ENDOPLASMIC RETICULUM MANNOSYL-OLIGOSACCHARIDE 1,2-ALPHA-MANNOSIDASE.
WDR18	IPI00032533	human	Tumor only														2	2			not annotated	21	39.2451	Yes		WD REPEAT-CONTAINING PROTEIN 18.
ERBB2IP	IPI00438286 ; IPI00438287 ; IPI00438288 ; IPI00438289 ; IPI00438290 ; IPI00438291 ; IPI00438292	human	Tumor only										2	2							Yes	93.25	53.9183	No	proteinaceousextracellularmatrix;plasmamembrane;nucleus;cytoplasm;"GO:0005634,IDA;GO:0005737,IDA;GO:0005886,IDA"	ISOFORM 1 OF PROTEIN LAP2.
NCKAP1	IPI00031982 ; IPI00409684	human	Tumor only										1	1	0.304006	0	7	3	1.12029	0.07	No	70.5	50.4772	No	cell;plasmamembrane;	NCK-ASSOCIATED PROTEIN 1.
DR1	IPI00008991	human	Tumor only										3	3	-0.0285692	0	6	1			No	10	66.3619	No	intracellular;nucleus;	PROTEIN DR1.
NSDHL	IPI00019407	human	Tumor only										13	7	-0.124328	0.05	22	8	0	0.01	No	28	45.2734	No	cell;endoplasmicreticulum;"GO:0005783,IDA;GO:0005783,IDA;GO:0005783,EXP"	STEROL-4-ALPHA-CARBOXYLATE 3-DEHYDROGENASE, DECARBOXYLATING.
PPA1	IPI00015018	human	Tumor only										34	8	-0.0143553	0.1	47	8	-0.0976108	0.03	No	22	27.2436	Yes	cytoplasm;cytosol;"GO:0005829,EXP"	INORGANIC PYROPHOSPHATASE.
SCAMP3	IPI00306382 ; IPI00306383 ; IPI00453116 ; IPI00607640	human	Tumor only										8	6			8	5			No	13.3333	52.1869	No	cell;Golgiapparatus; /// cell;	ISOFORM 1 OF SECRETORY CARRIER-ASSOCIATED MEMBRANE PROTEIN 3.
NT5E	IPI00009456 ; IPI00647259	human	Tumor only										2	2			1	1			No	28	29.2913	Yes	plasmamembrane;cell;"GO:0005886,EXP"	5'-NUCLEOTIDASE PRECURSOR.
EGFR	IPI00018274 ; IPI00221347 ; IPI00221348	human	Tumor only										182	26	-0.15056	0.21	116	19	0.104697	0.08	Yes	53.6667	37.7382	No	intracellular;extracellularspace;extracellularregion;endosome;cell;plasmamembrane;cytoplasm;proteincomplex;endoplasmicreticulum;nucleus;cytoplasmicmembrane-boundedvesicle;"GO:0005634,IDA;GO:0005737,IDA;GO:0005768,IDA;GO:0005783,IDA;GO:0005886,EXP;GO:00058	ISOFORM 1 OF EPIDERMAL GROWTH FACTOR RECEPTOR PRECURSOR.
TIMM44	IPI00306516	human	Tumor only										4	3			2	2			No	37	44.9934	No	cell;proteincomplex;mitochondrion;	IMPORT INNER MEMBRANE TRANSLOCASE SUBUNIT TIM44, MITOCHONDRIAL PRECURSOR.
MRPL50	IPI00329036	human	Tumor only										3	3			8	2			No	12	56.7601	No	mitochondrion;ribosome;	MITOCHONDRIAL 39S RIBOSOMAL PROTEIN L50.
H2AFV	IPI00141938	human	Tumor only										29	3			23	3			No	7	39.8798	Yes	nucleus;chromosome;	H2A HISTONE FAMILY, MEMBER V ISOFORM 2.
HNRNPUL1	IPI00013070 ; IPI00167147	human	Tumor only										6	4	0.136062	0	2	2	0.340075	0	No	55	54.89	No	nucleus;	ISOFORM 1 OF HETEROGENEOUS NUCLEAR RIBONUCLEOPROTEIN U-LIKE PROTEIN 1.
CST3	IPI00032293	human	Tumor only										2	2	0.358454	0	1	1			Yes	11	48.9986	No	extracellularspace;extracellularregion;"GO:0005615,IDA"	CYSTATIN-C PRECURSOR.
PFDN5	IPI00015361	human	Tumor only										10	3			5	1			No	13	37.1513	Yes	cytoplasm;proteincomplex;cytosol;nucleus;cytoskeleton;"GO:0005856,IDA"	PREFOLDIN SUBUNIT 5.
DDX39	IPI00062206 ; IPI00892920	human	Tumor only														16	3	0.136062	0.01	not annotated	20	45.156	No		DDX39 PROTEIN.
TPM4	IPI00010779	human	Tumor only										26	8	0.415037	0.01	50	10	-0.0840643	0.21	No	25	42.352	No	cytoplasm;proteincomplex;cytoskeleton;	ISOFORM 1 OF TROPOMYOSIN ALPHA-4 CHAIN.
LDHB	IPI00219217	human	Tumor only										32	8	-0.298658	0.09	128	9	0.0291463	0.04	No	23	26.8719	Yes	cytoplasm;	L-LACTATE DEHYDROGENASE B CHAIN.
PSMB10	IPI00027933	human	Tumor only										3	2							No	15	24.8681	Yes	proteincomplex;cytosol;nucleus;intracellular;cytoplasm;	PROTEASOME SUBUNIT BETA TYPE-10 PRECURSOR.
S100A6	IPI00027463	human	Tumor only										4	2			7	1			No	7	30.66	Yes	cell;nucleus;nuclearenvelope;cytoplasm;"GO:0005623,IDA;GO:0005634,IDA;GO:0005737,IDA"	PROTEIN S100-A6.
PCBP2	IPI00798126	human	Tumor only										4	2	0.304006	0					not annotated	7	30.7448	Yes		12 KDA PROTEIN.
ASPN	IPI00418431 ; IPI00647693	human	Tumor only										3	3	1.47393	0	2	1			Yes	20	38.8492	Yes	proteinaceousextracellularmatrix; /// cell;	ASPN PROTEIN.
HOOK3	IPI00031768	human	Tumor only										5	4			2	2			No	55	54.9985	No	cytoskeleton;cytoplasm;Golgiapparatus;"GO:0005794,IDA"	PROTEIN HOOK HOMOLOG 3.
ATP5L	IPI00027448	human	Tumor only										3	3			7	2			No	10	29.0728	Yes	cell;proteincomplex;mitochondrion;intracellular;"GO:0043234,IDA;GO:0005739,IDA"	ATP SYNTHASE SUBUNIT G, MITOCHONDRIAL.
RPS21	IPI00017448 ; IPI00387084	human	Tumor only										18	3	0.395929	0.03	11	3	0.184425	0	No	7.5	8.43374	Yes	intracellular;ribosome;cytoplasm;cytosol;"GO:0005737,IDA;GO:0005829,EXP;GO:0005840,IDA;GO:0005829,IDA;GO:0005840,IDA;GO:0005829,IDA" /// intracellular;ribosome;	40S RIBOSOMAL PROTEIN S21.
S100A16	IPI00062120	human	Tumor only										34	5			28	5			not annotated	8	30.8864	Yes		PROTEIN S100-A16.
GPKOW	IPI00024255	human	Tumor only										8	7							No	39	48.2231	No	intracellular;cellular_component;nucleus;	G PATCH DOMAIN AND KOW MOTIFS-CONTAINING PROTEIN.
VDAC1	IPI00216308	human	Tumor only										33	10	-0.275007	0.16	33	6	-0.111031	0.02	No	19	17.476	Yes	cell;plasmamembrane;mitochondrion;	VOLTAGE-DEPENDENT ANION-SELECTIVE CHANNEL PROTEIN 1.
RNH1	IPI00550069 ; IPI00783491	human	Tumor only										130	16	0.200913	0.13	137	14	0.234465	0.08	Yes	28.5	43.7894	No	proteincomplex;extracellularregion;cytoplasm;"GO:0043234,IPI;GO:0005576,IPI"	RIBONUCLEASE INHIBITOR.
TPM1	IPI00000230	human	Tumor only										14	5			40	7			No	30	47.4292	No	cytoplasm;nucleus;cytoskeleton;"GO:0005634,IDA;GO:0005737,IDA;GO:0005856,IDA"	TROPOMYOSIN 1 ALPHA CHAIN ISOFORM 2.
HUWE1	IPI00642197	human	Tumor only										3	2							not annotated	94	46.3247	No		HECT, UBA AND WWE DOMAIN CONTAINING 1.
	IPI00738655	human	Tumor only														88	3			not annotated	68	45.331	No		SIMILAR TO PROTEIN EXPRESSED IN PROSTATE, OVARY, TESTIS, AND PLACENTA 2.
	IPI00644171	human	Tumor only										38	5	0.358454	0.03	26	4	0.621488	0.01	No	14	65.1435	No	intracellular;ribosome;	UNCHARACTERIZED PROTEIN ENSP00000375160.
RPL35	IPI00412607	human	Tumor only										8	2			8	2			No	8	36.6911	Yes	nucleolus;cytosol;intracellular;ribosome;cytoplasm;"GO:0005737,IDA;GO:0005829,EXP"	60S RIBOSOMAL PROTEIN L35.
PDHX	IPI00298423	human	Tumor only										2	2			1	1			No	37	49.7393	No	mitochondrion;	PYRUVATE DEHYDROGENASE PROTEIN X COMPONENT, MITOCHONDRIAL PRECURSOR.
PTRF	IPI00176903	human	Tumor only										29	7			29	7			No	23	40.7546	No	plasmamembrane;cell;nucleoplasm;nucleus;mitochondrion;cytoplasm;endoplasmicreticulum;"GO:0005634,IDA;GO:0005654,EXP;GO:0005737,IDA;GO:0005739,IDA;GO:0005886,IDA"	ISOFORM 1 OF POLYMERASE I AND TRANSCRIPT RELEASE FACTOR.
CKMT1A;CKMT1B	IPI00658109	human	Tumor only										32	8	0.152003	0.07	24	7	0.0892673	0.06	No	30	42.7499	No	cell;mitochondrion;	CREATINE KINASE, UBIQUITOUS MITOCHONDRIAL PRECURSOR.
NT5DC1	IPI00177965	human	Tumor only										4	3			4	4	0.358454	0	not annotated	28	39.9644	Yes		5'-NUCLEOTIDASE DOMAIN-CONTAINING PROTEIN 1.
FAM3C	IPI00334282	human	Tumor only										4	3			1	1			Yes	20	32.0247	Yes	extracellularregion;	PROTEIN FAM3C PRECURSOR.
PVRL4	IPI00043992	human	Tumor only										3	3							Yes	32	52.648	No	cell;plasmamembrane;extracellularregion;	POLIOVIRUS RECEPTOR-RELATED PROTEIN 4 PRECURSOR.
TPX2	IPI00008477 ; IPI00102661	human	Tumor only										2	2							No	58	61.5785	No	nucleus;cytoskeleton;"GO:0005856,IDA"	TARGETING PROTEIN FOR XKLP2.
PFDN4	IPI00015891	human	Tumor only										4	3							No	9	61.6007	No	proteincomplex;cytosol;	PREFOLDIN SUBUNIT 4.
KLK10	IPI00480121	human	Tumor only										36	5	-0.536053	0.2	47	7	-0.422233	0.31	Yes	13	41.7996	No	extracellularregion;	KALLIKREIN-10 PRECURSOR.
LAMP1	IPI00004503 ; IPI00884105	human	Tumor only										7	3	0.599462	0					No	22.5	37.2782	Yes	endosome;cell;plasmamembrane;lysosome;cytoplasmicmembrane-boundedvesicle; /// plasmamembrane;cell;endosome;lysosome;cytoplasmicmembrane-boundedvesicle;	LYSOSOMAL-ASSOCIATED MEMBRANE PROTEIN 1.
	IPI00418184	human	Tumor only										41	2							No	13	32.5592	Yes	nucleus;chromosome;	WUGSC:H_NH0244E06.1 PROTEIN.
NDUFAF2	IPI00031109	human	Tumor only										2	1			2	2			No	12	51.2858	No	cell;mitochondrion;	MIMITIN, MITOCHONDRIAL PRECURSOR.
NDUFS6	IPI00025344	human	Tumor only										12	4	0.120294	0.08	4	3	-0.238787	0	No	10	30.9121	Yes	cell;proteincomplex;mitochondrion;	NADH DEHYDROGENASE [UBIQUINONE] IRON-SULFUR PROTEIN 6, MITOCHONDRIAL PRECURSOR.
EIF3M	IPI00102069	human	Tumor only										6	4							not annotated	28	34.557	Yes		EUKARYOTIC TRANSLATION INITIATION FACTOR 3 SUBUNIT M.
PRPS1;PRPS2	IPI00219616 ; IPI00219617 ; IPI00552495 ; IPI00718888 ; IPI00816572	human	Tumor only										1	1			5	2			No	18.3333	32.4573	Yes	cytosol;"GO:0005829,EXP"	RIBOSE-PHOSPHATE PYROPHOSPHOKINASE 1.
HLA-B;HLA-C;MICA;MICB	IPI00642409 ; IPI00657976 ; IPI00788914 ; IPI00789567 ; IPI00789627 ; IPI00790240 ; IPI00797359 ; IPI00797861 ; IPI00873869	human	Tumor only														18	5	0.168123	0.15	No	26	38.467	No	plasmamembrane;cell;proteincomplex;	HLA CLASS I HISTOCOMPATIBILITY ANTIGEN, CW-7 ALPHA CHAIN PRECURSOR.
DNAJA2	IPI00032406	human	Tumor only										9	8	0.0892673	0.01	14	4			No	30	39.2124	Yes	cell;	DNAJ HOMOLOG SUBFAMILY A MEMBER 2.
VASP	IPI00301058	human	Tumor only										10	7	-0.0565835	0.04	14	7			No	19	78.9598	No	cell;plasmamembrane;cytoskeleton;cytoplasm;	VASODILATOR-STIMULATED PHOSPHOPROTEIN.
TCIRG1	IPI00299719 ; IPI00328181	human	Tumor only										4	3							No	44	49.1981	No	plasmamembrane;	ISOFORM LONG OF VACUOLAR PROTON TRANSLOCATING ATPASE 116 KDA SUBUNIT A ISOFORM 3.
LY6D	IPI00029510	human	Tumor only										56	3	0.761213	0.06	5	2	0.514573	0.01	No	7	44.7242	No	plasmamembrane;cell;	LYMPHOCYTE ANTIGEN 6D PRECURSOR.
ARL6IP2	IPI00169267 ; IPI00845387 ; IPI00893779 ; IPI00894553	human	Tumor only										5	4			16	8	-0.545968	0.08	No	27.3333	37.6738	No	cell;	ISOFORM 1 OF ATLASTIN-2.
FAT2	IPI00302641	human	Tumor only										3	2			2	1			No	211	38.206	Yes	cell;plasmamembrane;cellular_component;	PROTOCADHERIN FAT 2 PRECURSOR.
C1QBP	IPI00014230 ; IPI00796075	human	Tumor only										18	6	-0.238787	0.02	23	4	-0.0285692	0.02	No	13.5	38.5652	No	plasmamembrane;mitochondrion;	COMPLEMENT COMPONENT 1 Q SUBCOMPONENT-BINDING PROTEIN, MITOCHONDRIAL PRECURSOR.
IDI1	IPI00220014	human	Tumor only										2	2			3	2			No	21	37.3018	Yes	cytosol;peroxisome;"GO:0005829,EXP"	ISOPENTENYL-DIPHOSPHATE DELTA ISOMERASE.
MCM4	IPI00018349	human	Tumor only										3	2			18	9	-0.0143553	0.04	No	63	52.4689	No	nucleoplasm;nucleus;"GO:0005654,EXP;GO:0005654,EXP;GO:0005654,EXP;GO:0005654,EXP;GO:0005654,EXP;GO:0005654,EXP;GO:0005654,EXP"	DNA REPLICATION LICENSING FACTOR MCM4.
EDC4	IPI00376317 ; IPI00477242 ; IPI00641449	human	Tumor only										2	2			2	2			No	56.3333	56.3086	No	nucleus;cytoplasm;"GO:0005634,IDA"	ISOFORM 1 OF ENHANCER OF MRNA-DECAPPING PROTEIN 4.
DST	IPI00074148 ; IPI00293251 ; IPI00642259 ; IPI00654639	human	Tumor only										2	2							No	434.5	46.2631	No	cytoskeleton;cytoplasm;	DYSTONIN ISOFORM 1.
RRM1	IPI00013871	human	Tumor only										3	2	0.0439433	0	2	1			No	51	42.6955	No	cytoplasm;proteincomplex;cytosol;"GO:0005829,EXP"	RIBONUCLEOSIDE-DIPHOSPHATE REDUCTASE LARGE SUBUNIT.
CPNE3	IPI00024403	human	Tumor only										9	5	0.340075	0.02	23	6	0.268817	0.05	No	31	37.8	Yes	cytoplasm;cytosol;"GO:0005829,IDA"	COPINE-3.
PREP	IPI00008164 ; IPI00747355	human	Tumor only										15	4	0.0740006	0.07	7	2			No	51.5	37.2186	Yes	cytoplasm;	PROLYL ENDOPEPTIDASE.
ALDH3A2	IPI00333619 ; IPI00394758	human	Tumor only										7	5	-0.163499	0	2	2			No	30	38.5004	Yes	cell;mitochondrion;endoplasmicreticulum;	ISOFORM 1 OF FATTY ALDEHYDE DEHYDROGENASE.
RIC8A	IPI00100106 ; IPI00749304	human	Tumor only										5	3			10	6	0.395929	0.04	No	34.5	50.6726	No	cytoplasm;	RESISTANCE TO INHIBITORS OF CHOLINESTERASE 8 HOMOLOG A.
SNAP29	IPI00032831 ; IPI00877836	human	Tumor only										3	2							No	18.5	37.5713	No	cell;plasmamembrane;cellular_component;cytoplasm;	SYNAPTOSOMAL-ASSOCIATED PROTEIN 29.
RUVBL2	IPI00009104	human	Tumor only										10	6			13	6			No	31	37.4499	Yes	intracellular;nucleoplasm;cell;cytoplasm;proteincomplex;cytosol;nucleus;"GO:0005622,IDA;GO:0005634,IDA;GO:0005654,IDA;GO:0043234,IDA"	RUVB-LIKE 2.
COPG2	IPI00002557	human	Tumor only														10	8	0.0892673	0	No	56	46.0314	No	organelle;cell;cytoplasm;proteincomplex;cytoplasmicmembrane-boundedvesicle;Golgiapparatus;"GO:0016023,IDA;GO:0005794,IDA;GO:0043234,IDA"	COATOMER SUBUNIT GAMMA-2.
TXNDC12	IPI00026328	human	Tumor only										4	2			4	3			No	15	40.5093	No	intracellular;organelle;endoplasmicreticulum;	THIOREDOXIN DOMAIN-CONTAINING PROTEIN 12 PRECURSOR.
BOLA2;BOLA2B	IPI00301434 ; IPI00410226 ; IPI00747913 ; IPI00873049	human	Tumor only										3	2	0.358454	0.01	6	2	0.415037	0.01	not annotated	9.33333	37.279	No		BOLA-LIKE PROTEIN 2.
PHLDA3	IPI00329599	human	Tumor only										6	2	0.136062	0.04					not annotated	12	47.4961	No		PLECKSTRIN HOMOLOGY-LIKE DOMAIN FAMILY A MEMBER 3.
PGRMC2	IPI00005202	human	Tumor only										5	2	-0.137504	0	8	5	0.340075	0	No	15	44.0138	No	cell;	MEMBRANE-ASSOCIATED PROGESTERONE RECEPTOR COMPONENT 2.
FAM25A;FAM25B;FAM25C;FAM25G	IPI00413368	human	Tumor only										19	3			7	3			not annotated	8	18.1854	Yes		PROTEIN FAM25.
COL7A1	IPI00025418 ; IPI00795118	human	Tumor only										26	12	-0.176323	0.05	52	10			Yes	182.5	32.0257	Yes	extracellularregion;proteinaceousextracellularmatrix; /// proteinaceousextracellularmatrix;extracellularregion;	ISOFORM 1 OF COLLAGEN ALPHA-1(VII) CHAIN PRECURSOR.
CARHSP1	IPI00304409	human	Tumor only										12	4			6	2			No	8	65.1048	No	cytoplasm;	CALCIUM-REGULATED HEAT STABLE PROTEIN 1.
SCAMP2	IPI00218850	human	Tumor only										6	2			4	2			No	8	43.2192	No	cell;	SECRETORY CARRIER-ASSOCIATED MEMBRANE PROTEIN 2.
	IPI00013290 ; IPI00885081	human	Tumor only										5	2	0.217591	0					not annotated	49	65.8871	No		ISOFORM 1 OF HEPATOMA-DERIVED GROWTH FACTOR-RELATED PROTEIN 2.
ATP5J	IPI00002521 ; IPI00456008 ; IPI00794158	human	Tumor only										4	1			15	3			No	10.5	50.4695	No	intracellular;cell;proteincomplex;mitochondrion;"GO:0043234,IDA;GO:0005739,IDA" /// cell;proteincomplex;mitochondrion;	ATP SYNTHASE-COUPLING FACTOR 6, MITOCHONDRIAL PRECURSOR.
USP10	IPI00291946	human	Tumor only										2	2	-0.124328	0	4	4	0.68966	0	not annotated	44	46.611	No		UBIQUITIN CARBOXYL-TERMINAL HYDROLASE 10.
IMMT	IPI00009960 ; IPI00554469	human	Tumor only										11	6			14	7			No	56.5	52.5964	No	cell;mitochondrion;"GO:0005739,IDA"	ISOFORM 1 OF MITOCHONDRIAL INNER MEMBRANE PROTEIN.
CTAGE5	IPI00006122 ; IPI00218139 ; IPI00401163 ; IPI00402229 ; IPI00515009 ; IPI00872345	human	Tumor only										2	1			3	2			No	53.5	56.4749	No	cytoplasm;mitochondrion;"GO:0005737,IDA;GO:0005739,IDA" /// mitochondrion;cytoplasm;"GO:0005737,IDA;GO:0005739,IDA"	ISOFORM MEA6 OF CUTANEOUS T-CELL LYMPHOMA-ASSOCIATED ANTIGEN 5.
F3	IPI00010338 ; IPI00384454	human	Tumor only										1	1			13	3	-0.687061	0.09	No	17	32.2173	Yes	cell;plasmamembrane;"GO:0005886,EXP;GO:0005886,EXP;GO:0005886,EXP;GO:0005886,EXP" /// cell;	TISSUE FACTOR PRECURSOR.
	IPI00020719	human	Tumor only										3	2							No	16	57.3909	No	cell;mitochondrion;	ISOFORM 1 OF MITOCHONDRIAL ANTIVIRAL-SIGNALING PROTEIN.
NOLA3	IPI00032853 ; IPI00798039	human	Tumor only										6	1			18	3	0.321928	0.02	No	4	38.3828	No	nucleus;intracellular;	H/ACA RIBONUCLEOPROTEIN COMPLEX SUBUNIT 3.
CCDC58	IPI00046828	human	Tumor only										3	2			3	2			not annotated	10	34.1319	Yes		COILED-COIL DOMAIN-CONTAINING PROTEIN 58.
SERPINH1	IPI00032140	human	Tumor only										67	13	0.736966	0	121	12			No	30	42.8165	No	intracellular;organelle;cytoplasm;endoplasmicreticulum;"GO:0005737,IDA"	SERPIN H1 PRECURSOR.
LSP1	IPI00013260 ; IPI00554652 ; IPI00657664	human	Tumor only										13	5			17	6			No	19.3333	66.8516	No	plasmamembrane;cytoskeleton;	LYMPHOCYTE-SPECIFIC PROTEIN 1.
C1orf144	IPI00470594 ; IPI00855711 ; IPI00855815 ; IPI00855947	human	Tumor only										6	3			2	2			not annotated	9	82.2441	No		ISOFORM 1 OF UPF0485 PROTEIN C1ORF144.
NSUN2	IPI00306369	human	Tumor only										4	3			8	5	0.577767	0.11	No	54	52.1106	No	nucleolus;nucleus;cytoplasm;"GO:0005730,IDA;GO:0005737,IDA"	TRNA.
ADH5	IPI00746777	human	Tumor only										24	4	-0.31034	0.18	25	4	-0.0285692	0.12	No	21	30.4989	Yes	cytoplasm;	ALCOHOL DEHYDROGENASE CLASS-3.
CLCA2	IPI00299094	human	Tumor only										9	4			21	4			Yes	44	32.1496	Yes	cell;plasmamembrane;extracellularregion;	CALCIUM-ACTIVATED CHLORIDE CHANNEL REGULATOR 2 PRECURSOR.
HSPA14	IPI00292499	human	Tumor only										1	1			2	2			not annotated	35	42.388	No		HEAT SHOCK 70 KDA PROTEIN 14.
NDUFA7	IPI00452731	human	Tumor only										6	2			4	1			No	10	76.085	No	cell;proteincomplex;mitochondrion;	NADH DEHYDROGENASE [UBIQUINONE] 1 ALPHA SUBCOMPLEX SUBUNIT 7.
AGR2	IPI00007427 ; IPI00893607 ; IPI00893881	human	Tumor only										3	2			1	1			Yes	13.6667	23.8286	Yes	extracellularregion;cytoplasm;"GO:0005737,IDA"	AGR2.
TINAGL1	IPI00005563	human	Tumor only										2	2	0.251539	0	11	3	0.321928	0.01	Yes	23	37.4296	Yes	extracellularregion;	ISOFORM 1 OF TUBULOINTERSTITIAL NEPHRITIS ANTIGEN-LIKE PRECURSOR.
A2ML1	IPI00419215	human	Tumor only														6	4			Yes	75	38.0279	Yes	extracellularspace;extracellularregion;"GO:0005615,IDA"	ALPHA-2-MACROGLOBULIN-LIKE PROTEIN 1 PRECURSOR.
NPM3	IPI00026496	human	Tumor only										8	2	-0.201634	0.1					No	9	72.5309	No	nucleolus;nucleus;	NUCLEOPLASMIN-3.
TTC35	IPI00014149	human	Tumor only										4	3			3	3			No	18	40.5805	No	endoplasmicreticulum;nucleus;"GO:0005783,IDA"	TETRATRICOPEPTIDE REPEAT PROTEIN 35.
MRPL1	IPI00549381	human	Tumor only										1	1			2	2	-0.111031	0	No	26	48.1117	No	mitochondrion;intracellular;ribosome;	MITOCHONDRIAL RIBOSOMAL PROTEIN L1 PRECURSOR.
	IPI00436518	human	Tumor only										16	2			7	2			not annotated	8	24.177	Yes		BENZODIAZEPINE RECEPTOR LIGAND.
S100A12	IPI00218131	human	Tumor only										20	2			7	3			No	5	22.4489	Yes	plasmamembrane;nucleolus;cell;cytosol;nucleus;cytoplasm;"GO:0005634,IDA;GO:0005730,IDA;GO:0005737,IDA;GO:0005886,IDA"	PROTEIN S100-A12.
	IPI00445750	human	Tumor only										2	2							not annotated	17	53.0905	No		CDNA FLJ43142 FIS, CLONE CTONG3007870.
NOL5A	IPI00411937 ; IPI00552225 ; IPI00642697	human	Tumor only										7	5	0.415037	0.01	4	3			No	30.5	34.5488	No	nucleolus;nucleus;	NUCLEOLAR PROTEIN 5A.
PPP3R1;WDR92	IPI00027464 ; IPI00556286	human	Tumor only										2	2	0.104697	0					No	11	24.0953	Yes	proteincomplex;cytosol;intracellular;"GO:0005829,EXP"	CALCINEURIN SUBUNIT B TYPE 1.
[truncated: 1,096 more rows]

## Sheet: Sheet1
IPI00465436	1
IPI00024284	1
IPI00291419	1
[truncated: 61 more rows]
